# Supplementary material for: Proteomic Profile of Mouse Brain Aging Contributions to Mitochondrial Dysfunction, DNA Oxidative Damage, Loss of Neurotrophic Factor, and Synaptic and Ribosomal Proteins
Source: Oxid Med Cell Longev. 2020 Jun 9;2020:5408452. doi: 10.1155/2020/5408452 (PMC7301248; doi:10.1155/2020/5408452)
Supplement: Supplementary 1 — Supplementary Excel 1: all the proteins of the hippocampus and cerebral cortex identified by the mass spectra. [file 5408452.f1.xls]

## Sheet: hippocampus-proteins
Protein Group	Protein ID	Accession	Significance	-10lgP	Intensity Young	Intensity Aged	Ratio Young	Ratio Aged	Intensity Young	Intensity Aged	Ratio Young	Ratio Aged	SD Young	SD Aged	Coverage (%)	#Peptides	#Unique	PTM	Avg. Mass	Description
21	15	Q62261|SPTB2_MOUSE	1.88	434.46	260000	239000	1	0.92	260000	239000	1	0.92	-	-	49	127	101	Carbamidomethylation; TMT6plex; Oxidation (M); Deamidation (NQ)	274221	Spectrin beta chain non-erythrocytic 1 OS=Mus musculus GN=Sptbn1 PE=1 SV=2
26	17	Q68FD5|CLH1_MOUSE	1.96	424.12	291000	264000	1	0.91	291000	264000	1	0.91	-	-	54	91	82	Carbamidomethylation; TMT6plex; Oxidation (M); Deamidation (NQ)	191555	Clathrin heavy chain 1 OS=Mus musculus GN=Cltc PE=1 SV=3
26	18	tr|Q5SXR6|Q5SXR6_MOUSE	1.96	424.12	291000	264000	1	0.91	291000	264000	1	0.91	-	-	53	91	82	Carbamidomethylation; TMT6plex; Oxidation (M); Deamidation (NQ)	191985	Clathrin heavy chain OS=Mus musculus GN=Cltc PE=1 SV=1
38	108	Q9JHU4|DYHC1_MOUSE	1.48	395.38	102000	93900	1	0.92	102000	93900	1	0.92	-	-	26	130	118	Carbamidomethylation; TMT6plex; Deamidation (NQ)	532050	Cytoplasmic dynein 1 heavy chain 1 OS=Mus musculus GN=Dync1h1 PE=1 SV=2
40	107	Q9QYR6|MAP1A_MOUSE	3.35	390.23	155000	133000	1	0.86	155000	133000	1	0.86	-	-	33	78	70	Carbamidomethylation; TMT6plex; Oxidation (M); Deamidation (NQ)	300139	Microtubule-associated protein 1A OS=Mus musculus GN=Map1a PE=1 SV=2
40	112	tr|A2ARP8|A2ARP8_MOUSE	3.35	390.23	155000	133000	1	0.86	155000	133000	1	0.86	-	-	30	78	70	Carbamidomethylation; TMT6plex; Oxidation (M); Deamidation (NQ)	325886	Microtubule-associated protein 1A OS=Mus musculus GN=Map1a PE=1 SV=1
5	20	Q6PIC6|AT1A3_MOUSE	2.21	388.68	467000	417000	1	0.89	467000	417000	1	0.89	-	-	34	66	38	Carbamidomethylation; TMT6plex; Oxidation (M); Deamidation (NQ)	111691	Sodium/potassium-transporting ATPase subunit alpha-3 OS=Mus musculus GN=Atp1a3 PE=1 SV=1
5	21	tr|A0A0G2JGX4|A0A0G2JGX4_MOUSE	2.21	388.68	467000	417000	1	0.89	467000	417000	1	0.89	-	-	33	66	38	Carbamidomethylation; TMT6plex; Oxidation (M); Deamidation (NQ)	112988	Sodium/potassium-transporting ATPase subunit alpha OS=Mus musculus GN=Atp1a3 PE=1 SV=1
46	76	tr|Q68FG2|Q68FG2_MOUSE	2.51	378.12	80800	69900	1	0.86	80800	69900	1	0.86	-	-	28	79	62	Carbamidomethylation; TMT6plex; Oxidation (M); Deamidation (NQ)	270921	Spectrin beta chain OS=Mus musculus GN=Sptbn2 PE=1 SV=1
61	103	P14873|MAP1B_MOUSE	1.95	377.97	92000	83600	1	0.91	92000	83600	1	0.91	-	-	30	71	60	Carbamidomethylation; TMT6plex; Oxidation (M); Deamidation (NQ)	270252	Microtubule-associated protein 1B OS=Mus musculus GN=Map1b PE=1 SV=2
24	11	O08553|DPYL2_MOUSE	0.55	376.73	277000	281000	1	1.02	277000	281000	1	1.02	-	-	60	37	29	Carbamidomethylation; TMT6plex; Oxidation (M); Deamidation (NQ)	62278	Dihydropyrimidinase-related protein 2 OS=Mus musculus GN=Dpysl2 PE=1 SV=2
3	43	P68372|TBB4B_MOUSE	0.52	374.87	20500	20900	1	1.02	20500	20900	1	1.02	-	-	3	59	1	TMT6plex; Deamidation (NQ)	49831	Tubulin beta-4B chain OS=Mus musculus GN=Tubb4b PE=1 SV=1
1	30	Q7TMM9|TBB2A_MOUSE	0.99	374.57	68700	65900	1	0.96	68700	65900	1	0.96	-	-	3	58	1	TMT6plex; Deamidation (NQ)	49907	Tubulin beta-2A chain OS=Mus musculus GN=Tubb2a PE=1 SV=1
6	45	Q9D6F9|TBB4A_MOUSE	0.64	372.79	39900	41100	1	1.03	39900	41100	1	1.03	-	-	16	58	6	TMT6plex; Oxidation (M); Deamidation (NQ)	49586	Tubulin beta-4A chain OS=Mus musculus GN=Tubb4a PE=1 SV=3
2	48	Q9CWF2|TBB2B_MOUSE	5.26	372.58	6370	4390	1	0.69	6370	4390	1	0.69	-	-	3	58	1	TMT6plex; Deamidation (NQ)	49953	Tubulin beta-2B chain OS=Mus musculus GN=Tubb2b PE=1 SV=1
4	46	P99024|TBB5_MOUSE	0.58	372.48	74000	72500	1	0.98	74000	72500	1	0.98	-	-	16	55	4	TMT6plex; Oxidation (M); Deamidation (NQ)	49671	Tubulin beta-5 chain OS=Mus musculus GN=Tubb5 PE=1 SV=1
16	3	P68373|TBA1C_MOUSE	1.19	369.27	1070	905.009	1	0.84	1070	905.009	1	0.84	-	-	5	48	1	Carbamidomethylation; TMT6plex; Deamidation (NQ)	49909	Tubulin alpha-1C chain OS=Mus musculus GN=Tuba1c PE=1 SV=1
17	94	Q6PIE5|AT1A2_MOUSE	1.32	367.99	115000	108000	1	0.94	115000	108000	1	0.94	-	-	26	55	28	Carbamidomethylation; TMT6plex; Oxidation (M); Deamidation (NQ)	112217	Sodium/potassium-transporting ATPase subunit alpha-2 OS=Mus musculus GN=Atp1a2 PE=1 SV=1
15	2	P68368|TBA4A_MOUSE	2.14	366.18	182000	208000	1	1.14	182000	208000	1	1.14	-	-	13	47	5	Carbamidomethylation; TMT6plex; Deamidation (NQ)	49924	Tubulin alpha-4A chain OS=Mus musculus GN=Tuba4a PE=1 SV=1
15	4	tr|A0A0A0MQA5|A0A0A0MQA5_MOUSE	2.14	366.18	182000	208000	1	1.14	182000	208000	1	1.14	-	-	12	47	5	Carbamidomethylation; TMT6plex; Deamidation (NQ)	52912	Tubulin alpha chain (Fragment) OS=Mus musculus GN=Tuba4a PE=1 SV=1
41	81	P20357|MTAP2_MOUSE	6.85	365.87	177000	129000	1	0.73	177000	129000	1	0.73	-	-	27	69	43	Carbamidomethylation; TMT6plex; Oxidation (M); Deamidation (NQ)	199130	Microtubule-associated protein 2 OS=Mus musculus GN=Map2 PE=1 SV=2
30	16	Q03265|ATPA_MOUSE	3.36	362.64	267000	309000	1	1.16	267000	309000	1	1.16	-	-	59	40	35	Carbamidomethylation; TMT6plex; Oxidation (M); Deamidation (NQ)	59753	ATP synthase subunit alpha mitochondrial OS=Mus musculus GN=Atp5a1 PE=1 SV=1
32	13	P56480|ATPB_MOUSE	2.55	360.23	410000	465000	1	1.14	410000	465000	1	1.14	-	-	69	36	35	TMT6plex; Oxidation (M); Deamidation (NQ)	56301	ATP synthase subunit beta mitochondrial OS=Mus musculus GN=Atp5b PE=1 SV=2
33	55	P63017|HSP7C_MOUSE	3.13	359.3	310000	273000	1	0.88	310000	273000	1	0.88	-	-	43	48	27	Carbamidomethylation; TMT6plex; Oxidation (M); Deamidation (NQ)	70871	Heat shock cognate 71 kDa protein OS=Mus musculus GN=Hspa8 PE=1 SV=1
48	10	O88935|SYN1_MOUSE	2.51	358.41	186000	204000	1	1.1	186000	204000	1	1.1	-	-	41	27	21	Carbamidomethylation; TMT6plex; Oxidation (M); Deamidation (NQ)	74097	Synapsin-1 OS=Mus musculus GN=Syn1 PE=1 SV=2
19	93	Q8VDN2|AT1A1_MOUSE	1.72	356.28	91800	85600	1	0.93	91800	85600	1	0.93	-	-	28	51	27	Carbamidomethylation; TMT6plex; Oxidation (M); Deamidation (NQ)	112982	Sodium/potassium-transporting ATPase subunit alpha-1 OS=Mus musculus GN=Atp1a1 PE=1 SV=1
31	1	P05064|ALDOA_MOUSE	5.95	356.17	33300	29700	1	0.89	33300	29700	1	0.89	-	-	23	37	4	TMT6plex; Oxidation (M)	39356	Fructose-bisphosphate aldolase A OS=Mus musculus GN=Aldoa PE=1 SV=2
31	5	tr|A6ZI44|A6ZI44_MOUSE	5.95	356.17	33300	29700	1	0.89	33300	29700	1	0.89	-	-	20	37	4	TMT6plex; Oxidation (M)	45120	Fructose-bisphosphate aldolase OS=Mus musculus GN=Aldoa PE=1 SV=1
35	50	tr|A0A0J9YUN4|A0A0J9YUN4_MOUSE	1.12	351.82	8780	8490	1	0.97	8780	8490	1	0.97	-	-	4	51	2	TMT6plex	97295	Dynamin-1 OS=Mus musculus GN=Dnm1 PE=1 SV=1
36	57	P39053|DYN1_MOUSE	4.54	347.24	1110	1440	1	1.3	1110	1440	1	1.3	-	-	2	49	1	TMT6plex; Oxidation (M)	97803	Dynamin-1 OS=Mus musculus GN=Dnm1 PE=1 SV=2
70	249	Q9QXS1|PLEC_MOUSE	1.67	346.25	41100	38100	1	0.93	41100	38100	1	0.93	-	-	16	84	73	Carbamidomethylation; TMT6plex	534193	Plectin OS=Mus musculus GN=Plec PE=1 SV=3
14	33	Q9ERD7|TBB3_MOUSE	0.78	344.98	28000	27700	1	0.99	28000	27700	1	0.99	-	-	18	43	4	TMT6plex; Oxidation (M); Deamidation (NQ)	50419	Tubulin beta-3 chain OS=Mus musculus GN=Tubb3 PE=1 SV=1
25	211	tr|S4R1W1|S4R1W1_MOUSE	3.14	343.48	8050	9100	1	1.13	8050	9100	1	1.13	-	-	5	37	1	Carbamidomethylation; TMT6plex; Deamidation (NQ)	35812	Glyceraldehyde-3-phosphate dehydrogenase OS=Mus musculus GN=Gm3839 PE=1 SV=1
43	19	Q99KI0|ACON_MOUSE	1.11	342.93	299000	293000	1	0.98	299000	293000	1	0.98	-	-	58	45	40	Carbamidomethylation; TMT6plex; Oxidation (M); Deamidation (NQ)	85464	Aconitate hydratase mitochondrial OS=Mus musculus GN=Aco2 PE=1 SV=1
39	32	P46460|NSF_MOUSE	1.6	339.3	274000	248000	1	0.91	274000	248000	1	0.91	-	-	65	52	44	Carbamidomethylation; TMT6plex; Oxidation (M); Deamidation (NQ)	82613	Vesicle-fusing ATPase OS=Mus musculus GN=Nsf PE=1 SV=2
42	40	O08599|STXB1_MOUSE	2.19	335.95	251000	242000	1	0.97	251000	242000	1	0.97	-	-	69	49	42	Carbamidomethylation; TMT6plex; Oxidation (M); Deamidation (NQ)	67569	Syntaxin-binding protein 1 OS=Mus musculus GN=Stxbp1 PE=1 SV=2
34	52	P52480|KPYM_MOUSE	3.44	333.77	360000	401000	1	1.11	360000	401000	1	1.11	-	-	58	36	29	Carbamidomethylation; TMT6plex; Oxidation (M); Deamidation (NQ)	57845	Pyruvate kinase PKM OS=Mus musculus GN=Pkm PE=1 SV=4
13	36	P60710|ACTB_MOUSE	5.87	333.52	294000	294000	1	1	294000	294000	1	1	-	-	30	37	11	Carbamidomethylation; TMT6plex; Oxidation (M); Deamidation (NQ)	41737	Actin cytoplasmic 1 OS=Mus musculus GN=Actb PE=1 SV=1
13	37	P63260|ACTG_MOUSE	5.87	333.52	294000	294000	1	1	294000	294000	1	1	-	-	30	37	11	Carbamidomethylation; TMT6plex; Oxidation (M); Deamidation (NQ)	41793	Actin cytoplasmic 2 OS=Mus musculus GN=Actg1 PE=1 SV=1
86	89	P17710|HXK1_MOUSE	0.53	332.17	110000	107000	1	0.97	110000	107000	1	0.97	-	-	40	45	34	Carbamidomethylation; TMT6plex; Oxidation (M); Deamidation (NQ)	108303	Hexokinase-1 OS=Mus musculus GN=Hk1 PE=1 SV=3
86	100	tr|G3UVV4|G3UVV4_MOUSE	0.53	332.17	110000	107000	1	0.97	110000	107000	1	0.97	-	-	42	45	34	Carbamidomethylation; TMT6plex; Oxidation (M); Deamidation (NQ)	101873	Hexokinase 1 isoform CRA_f OS=Mus musculus GN=Hk1 PE=1 SV=1
23	8	P17182|ENOA_MOUSE	2.42	330.89	338000	384000	1	1.14	338000	384000	1	1.14	-	-	54	34	19	Carbamidomethylation; TMT6plex; Oxidation (M); Deamidation (NQ)	47141	Alpha-enolase OS=Mus musculus GN=Eno1 PE=1 SV=3
132	23	Q8BYI9|TENR_MOUSE	1.26	329.41	50600	49000	1	0.97	50600	49000	1	0.97	-	-	25	29	26	Carbamidomethylation; TMT6plex; Oxidation (M); Deamidation (NQ)	149589	Tenascin-R OS=Mus musculus GN=Tnr PE=1 SV=2
69	9	P62814|VATB2_MOUSE	0.89	328.6	68800	66400	1	0.96	68800	66400	1	0.96	-	-	41	23	16	Carbamidomethylation; TMT6plex; Deamidation (NQ)	56551	V-type proton ATPase subunit B brain isoform OS=Mus musculus GN=Atp6v1b2 PE=1 SV=1
29	12	P17183|ENOG_MOUSE	3.35	328.06	216000	203000	1	0.94	216000	203000	1	0.94	-	-	52	32	17	Carbamidomethylation; TMT6plex; Oxidation (M); Deamidation (NQ)	47297	Gamma-enolase OS=Mus musculus GN=Eno2 PE=1 SV=2
50	63	P07901|HS90A_MOUSE	3.06	327.34	122000	103000	1	0.85	122000	103000	1	0.85	-	-	30	44	22	Carbamidomethylation; TMT6plex; Oxidation (M); Deamidation (NQ)	84788	Heat shock protein HSP 90-alpha OS=Mus musculus GN=Hsp90aa1 PE=1 SV=4
52	147	P11499|HS90B_MOUSE	3.99	326.43	78700	66000	1	0.84	78700	66000	1	0.84	-	-	29	44	19	Carbamidomethylation; TMT6plex	83281	Heat shock protein HSP 90-beta OS=Mus musculus GN=Hsp90ab1 PE=1 SV=3
37	264	Q9JJZ2|TBA8_MOUSE	4.97	326.12	988	1210	1	1.23	988	1210	1	1.23	-	-	10	32	3	TMT6plex	50052	Tubulin alpha-8 chain OS=Mus musculus GN=Tuba8 PE=1 SV=1
113	110	tr|Q3UHH0|Q3UHH0_MOUSE	1.91	325.79	367	475.189	1	1.29	367	475.189	1	1.29	-	-	1	45	1	TMT6plex	132106	Calcium-transporting ATPase OS=Mus musculus GN=Atp2b2 PE=1 SV=1
113	111	Q9R0K7|AT2B2_MOUSE	1.91	325.79	367	475.189	1	1.29	367	475.189	1	1.29	-	-	1	45	1	TMT6plex	132587	Plasma membrane calcium-transporting ATPase 2 OS=Mus musculus GN=Atp2b2 PE=1 SV=2
113	113	tr|F8WHB1|F8WHB1_MOUSE	1.91	325.79	367	475.189	1	1.29	367	475.189	1	1.29	-	-	1	45	1	TMT6plex	136783	Calcium-transporting ATPase OS=Mus musculus GN=Atp2b2 PE=1 SV=1
95	114	G5E829|AT2B1_MOUSE	2.05	324.8	29800	26400	1	0.89	29800	26400	1	0.89	-	-	15	47	16	Carbamidomethylation; TMT6plex; Oxidation (M); Deamidation (NQ)	134747	Plasma membrane calcium-transporting ATPase 1 OS=Mus musculus GN=Atp2b1 PE=1 SV=1
27	28	Q04447|KCRB_MOUSE	2.39	323.81	282000	318000	1	1.13	282000	318000	1	1.13	-	-	72	28	20	Carbamidomethylation; TMT6plex; Oxidation (M); Deamidation (NQ)	42713	Creatine kinase B-type OS=Mus musculus GN=Ckb PE=1 SV=1
56	34	P50516|VATA_MOUSE	1.45	323.8	169000	177000	1	1.05	169000	177000	1	1.05	-	-	62	34	33	Carbamidomethylation; TMT6plex; Oxidation (M); Acetylation (Protein N-term); Deamidation (NQ)	68326	V-type proton ATPase catalytic subunit A OS=Mus musculus GN=Atp6v1a PE=1 SV=2
130	170	Q61879|MYH10_MOUSE	4.33	322.78	11300	8790	1	0.77	11300	8790	1	0.77	-	-	13	37	21	Carbamidomethylation; TMT6plex; Deamidation (NQ)	228994	Myosin-10 OS=Mus musculus GN=Myh10 PE=1 SV=2
130	171	tr|Q3UH59|Q3UH59_MOUSE	4.33	322.78	11300	8790	1	0.77	11300	8790	1	0.77	-	-	13	37	21	Carbamidomethylation; TMT6plex; Deamidation (NQ)	233447	Myosin-10 OS=Mus musculus GN=Myh10 PE=1 SV=1
110	77	P17427|AP2A2_MOUSE	1.09	322.11	43700	41100	1	0.94	43700	41100	1	0.94	-	-	30	38	24	Carbamidomethylation; TMT6plex; Oxidation (M); Deamidation (NQ)	104016	AP-2 complex subunit alpha-2 OS=Mus musculus GN=Ap2a2 PE=1 SV=2
73	96	tr|A0A0R4J036|A0A0R4J036_MOUSE	2.65	322.03	106000	106000	1	1.01	106000	106000	1	1.01	-	-	40	36	29	Carbamidomethylation; TMT6plex; Oxidation (M); Deamidation (NQ)	95941	Neurofilament 3 medium OS=Mus musculus GN=Nefm PE=1 SV=1
73	101	P08553|NFM_MOUSE	2.65	322.03	106000	106000	1	1.01	106000	106000	1	1.01	-	-	40	36	29	Carbamidomethylation; TMT6plex; Oxidation (M); Deamidation (NQ)	95916	Neurofilament medium polypeptide OS=Mus musculus GN=Nefm PE=1 SV=4
121	102	Q02053|UBA1_MOUSE	1.44	321.41	35500	35200	1	0.99	35500	35200	1	0.99	-	-	26	30	19	Carbamidomethylation; TMT6plex; Oxidation (M)	117809	Ubiquitin-like modifier-activating enzyme 1 OS=Mus musculus GN=Uba1 PE=1 SV=1
177	209	O88737|BSN_MOUSE	1.71	319.67	16100	14700	1	0.91	16100	14700	1	0.91	-	-	8	31	26	Carbamidomethylation; TMT6plex; Deamidation (NQ)	418848	Protein bassoon OS=Mus musculus GN=Bsn PE=1 SV=4
96	189	Q8CHC4|SYNJ1_MOUSE	1.62	319.5	67400	60600	1	0.9	67400	60600	1	0.9	-	-	34	51	44	Carbamidomethylation; TMT6plex; Oxidation (M); Deamidation (NQ)	172616	Synaptojanin-1 OS=Mus musculus GN=Synj1 PE=1 SV=3
94	65	Q01853|TERA_MOUSE	1.66	318.99	62100	57800	1	0.93	62100	57800	1	0.93	-	-	45	43	34	Carbamidomethylation; TMT6plex; Oxidation (M); Deamidation (NQ)	89322	Transitional endoplasmic reticulum ATPase OS=Mus musculus GN=Vcp PE=1 SV=4
78	54	P07724|ALBU_MOUSE	7.36	318.44	157000	176000	1	1.12	157000	176000	1	1.12	-	-	59	38	31	Carbamidomethylation; TMT6plex; Oxidation (M); Deamidation (NQ)	68693	Serum albumin OS=Mus musculus GN=Alb PE=1 SV=3
51	26	P08249|MDHM_MOUSE	3.32	318.42	397000	453000	1	1.14	397000	453000	1	1.14	-	-	63	22	21	Carbamidomethylation; TMT6plex; Oxidation (M); Deamidation (NQ)	35611	Malate dehydrogenase mitochondrial OS=Mus musculus GN=Mdh2 PE=1 SV=3
92	158	Q9DBG3|AP2B1_MOUSE	1.29	318.27	49700	45400	1	0.91	49700	45400	1	0.91	-	-	25	45	19	Carbamidomethylation; TMT6plex; Oxidation (M); Deamidation (NQ)	104583	AP-2 complex subunit beta OS=Mus musculus GN=Ap2b1 PE=1 SV=1
151	154	O35643|AP1B1_MOUSE	1.12	317.37	12900	12500	1	0.97	12900	12500	1	0.97	-	-	19	38	13	Carbamidomethylation; TMT6plex; Deamidation (NQ)	103935	AP-1 complex subunit beta-1 OS=Mus musculus GN=Ap1b1 PE=1 SV=2
22	137	Q922F4|TBB6_MOUSE	2.17	316.48	15100	15800	1	1.05	15100	15800	1	1.05	-	-	20	43	5	TMT6plex; Oxidation (M); Deamidation (NQ)	50090	Tubulin beta-6 chain OS=Mus musculus GN=Tubb6 PE=1 SV=1
71	59	P63038|CH60_MOUSE	2.05	316.26	140000	131000	1	0.93	140000	131000	1	0.93	-	-	53	37	30	Carbamidomethylation; TMT6plex; Oxidation (M); Deamidation (NQ)	60956	60 kDa heat shock protein mitochondrial OS=Mus musculus GN=Hspd1 PE=1 SV=1
55	29	P09411|PGK1_MOUSE	3.92	315.19	186000	197000	1	1.06	186000	197000	1	1.06	-	-	67	36	24	Carbamidomethylation; TMT6plex; Oxidation (M); Deamidation (NQ)	44550	Phosphoglycerate kinase 1 OS=Mus musculus GN=Pgk1 PE=1 SV=4
162	84	P58252|EF2_MOUSE	1.98	315.18	56200	50900	1	0.9	56200	50900	1	0.9	-	-	49	37	36	Carbamidomethylation; TMT6plex; Oxidation (M); Deamidation (NQ)	95314	Elongation factor 2 OS=Mus musculus GN=Eef2 PE=1 SV=2
103	152	Q8CI94|PYGB_MOUSE	0.93	314.95	49600	49700	1	1	49600	49700	1	1	-	-	31	37	25	Carbamidomethylation; TMT6plex; Oxidation (M)	96730	Glycogen phosphorylase brain form OS=Mus musculus GN=Pygb PE=1 SV=3
149	64	tr|Q3U2G2|Q3U2G2_MOUSE	1.74	314.5	43700	39800	1	0.91	43700	39800	1	0.91	-	-	46	45	36	Carbamidomethylation; TMT6plex; Oxidation (M)	94209	Heat shock 70 kDa protein 4 OS=Mus musculus GN=Hspa4 PE=1 SV=1
120	69	Q9Z0E0|NCDN_MOUSE	3.03	312.93	75200	67200	1	0.89	75200	67200	1	0.89	-	-	42	28	26	Carbamidomethylation; TMT6plex	78895	Neurochondrin OS=Mus musculus GN=Ncdn PE=1 SV=1
84	25	P05063|ALDOC_MOUSE	2.11	312.89	71700	74800	1	1.04	71700	74800	1	1.04	-	-	61	27	20	Carbamidomethylation; TMT6plex; Oxidation (M); Deamidation (NQ)	39395	Fructose-bisphosphate aldolase C OS=Mus musculus GN=Aldoc PE=1 SV=4
44	213	P16330|CN37_MOUSE	7.13	311.92	382000	455000	1	1.19	382000	455000	1	1.19	-	-	58	34	28	Carbamidomethylation; TMT6plex; Oxidation (M); Deamidation (NQ)	47123	2' 3'-cyclic-nucleotide 3'-phosphodiesterase OS=Mus musculus GN=Cnp PE=1 SV=3
178	259	P19096|FAS_MOUSE	1.41	311.7	23600	21500	1	0.91	23600	21500	1	0.91	-	-	14	37	32	Carbamidomethylation; TMT6plex; Deamidation (NQ)	272426	Fatty acid synthase OS=Mus musculus GN=Fasn PE=1 SV=2
114	24	P05201|AATC_MOUSE	2.19	311.26	86700	91000	1	1.05	86700	91000	1	1.05	-	-	77	33	31	Carbamidomethylation; TMT6plex; Oxidation (M); Deamidation (NQ)	46248	Aspartate aminotransferase cytoplasmic OS=Mus musculus GN=Got1 PE=1 SV=3
90	126	P05202|AATM_MOUSE	1.41	309.1	186000	194000	1	1.04	186000	194000	1	1.04	-	-	69	32	30	Carbamidomethylation; TMT6plex; Oxidation (M); Deamidation (NQ)	47411	Aspartate aminotransferase mitochondrial OS=Mus musculus GN=Got2 PE=1 SV=1
156	80	P40142|TKT_MOUSE	1.15	307.77	57900	62300	1	1.08	57900	62300	1	1.08	-	-	47	32	27	Carbamidomethylation; TMT6plex; Oxidation (M); Acetylation (Protein N-term)	67631	Transketolase OS=Mus musculus GN=Tkt PE=1 SV=1
77	70	Q64332|SYN2_MOUSE	4.51	307.1	89700	100000	1	1.12	89700	100000	1	1.12	-	-	45	26	19	TMT6plex; Oxidation (M); Deamidation (NQ)	63373	Synapsin-2 OS=Mus musculus GN=Syn2 PE=1 SV=2
136	191	Q80TJ1|CAPS1_MOUSE	2.7	306.96	33300	30000	1	0.9	33300	30000	1	0.9	-	-	22	32	24	Carbamidomethylation; TMT6plex; Oxidation (M); Deamidation (NQ)	153112	Calcium-dependent secretion activator 1 OS=Mus musculus GN=Cadps PE=1 SV=3
99	53	P46660|AINX_MOUSE	3.94	306.76	74700	91200	1	1.22	74700	91200	1	1.22	-	-	43	28	19	Carbamidomethylation; TMT6plex; Deamidation (NQ)	55383	Alpha-internexin OS=Mus musculus GN=Ina PE=1 SV=3
143	218	Q7TSJ2|MAP6_MOUSE	1.55	306.53	60100	54200	1	0.9	60100	54200	1	0.9	-	-	48	39	38	TMT6plex; Oxidation (M); Deamidation (NQ)	96450	Microtubule-associated protein 6 OS=Mus musculus GN=Map6 PE=1 SV=2
211	66	Q8BH59|CMC1_MOUSE	2.6	305.94	35100	36900	1	1.05	35100	36900	1	1.05	-	-	43	33	23	Carbamidomethylation; TMT6plex; Deamidation (NQ)	74570	Calcium-binding mitochondrial carrier protein Aralar1 OS=Mus musculus GN=Slc25a12 PE=1 SV=1
102	104	tr|A0A0A6YY91|A0A0A6YY91_MOUSE	1.18	305.81	5130	4870	1	0.95	5130	4870	1	0.95	-	-	5	36	3	TMT6plex	116375	Neural cell adhesion molecule 1 (Fragment) OS=Mus musculus GN=Ncam1 PE=1 SV=1
173	293	Q8BPN8|DMXL2_MOUSE	1.3	305.41	18800	17100	1	0.91	18800	17100	1	0.91	-	-	12	38	29	Carbamidomethylation; TMT6plex; Deamidation (NQ)	338209	DmX-like protein 2 OS=Mus musculus GN=Dmxl2 PE=1 SV=3
173	295	tr|B0V2P5|B0V2P5_MOUSE	1.3	305.41	18800	17100	1	0.91	18800	17100	1	0.91	-	-	12	38	29	Carbamidomethylation; TMT6plex; Deamidation (NQ)	340696	DmX-like protein 2 OS=Mus musculus GN=Dmxl2 PE=1 SV=1
93	140	P26443|DHE3_MOUSE	2.36	303.56	118000	135000	1	1.14	118000	135000	1	1.14	-	-	54	29	27	Carbamidomethylation; TMT6plex; Oxidation (M); Deamidation (NQ)	61337	Glutamate dehydrogenase 1 mitochondrial OS=Mus musculus GN=Glud1 PE=1 SV=1
82	133	tr|Q6P1J1|Q6P1J1_MOUSE	2.62	303.27	2720	2690	1	0.99	2720	2690	1	0.99	-	-	6	29	3	TMT6plex	74221	Crmp1 protein OS=Mus musculus GN=Crmp1 PE=1 SV=1
144	169	P08551|NFL_MOUSE	1.76	303.09	88000	97500	1	1.11	88000	97500	1	1.11	-	-	42	30	25	Carbamidomethylation; TMT6plex; Oxidation (M)	61509	Neurofilament light polypeptide OS=Mus musculus GN=Nefl PE=1 SV=5
104	58	P50396|GDIA_MOUSE	1.47	302.98	60400	57800	1	0.96	60400	57800	1	0.96	-	-	56	26	20	Carbamidomethylation; TMT6plex; Oxidation (M); Deamidation (NQ)	50522	Rab GDP dissociation inhibitor alpha OS=Mus musculus GN=Gdi1 PE=1 SV=3
147	228	tr|A1BN54|A1BN54_MOUSE	4.46	302.63	17100	13200	1	0.78	17100	13200	1	0.78	-	-	23	32	16	Carbamidomethylation; TMT6plex	102720	Alpha actinin 1a OS=Mus musculus GN=Actn1 PE=1 SV=1
125	219	P17426|AP2A1_MOUSE	0.39	301.27	36100	35000	1	0.97	36100	35000	1	0.97	-	-	30	39	24	Carbamidomethylation; TMT6plex; Oxidation (M); Deamidation (NQ)	107664	AP-2 complex subunit alpha-1 OS=Mus musculus GN=Ap2a1 PE=1 SV=1
171	182	Q6ZQ38|CAND1_MOUSE	1.82	300.77	38800	35800	1	0.92	38800	35800	1	0.92	-	-	31	41	33	Carbamidomethylation; TMT6plex; Deamidation (NQ)	136331	Cullin-associated NEDD8-dissociated protein 1 OS=Mus musculus GN=Cand1 PE=1 SV=2
140	196	O55143|AT2A2_MOUSE	2.79	299.71	27600	24600	1	0.89	27600	24600	1	0.89	-	-	19	30	16	Carbamidomethylation; TMT6plex	114858	Sarcoplasmic/endoplasmic reticulum calcium ATPase 2 OS=Mus musculus GN=Atp2a2 PE=1 SV=2
87	72	P06745|G6PI_MOUSE	3.24	299.54	68200	65900	1	0.97	68200	65900	1	0.97	-	-	41	30	18	Carbamidomethylation; TMT6plex; Oxidation (M); Deamidation (NQ)	62767	Glucose-6-phosphate isomerase OS=Mus musculus GN=Gpi PE=1 SV=4
83	98	P17156|HSP72_MOUSE	1.38	299.4	8120	7400	1	0.91	8120	7400	1	0.91	-	-	18	30	9	TMT6plex; Deamidation (NQ)	69642	Heat shock-related 70 kDa protein 2 OS=Mus musculus GN=Hspa2 PE=1 SV=2
167	68	O88342|WDR1_MOUSE	1.63	298.3	64500	59600	1	0.92	64500	59600	1	0.92	-	-	51	29	29	Carbamidomethylation; TMT6plex; Deamidation (NQ)	66407	WD repeat-containing protein 1 OS=Mus musculus GN=Wdr1 PE=1 SV=3
169	153	P48722|HS74L_MOUSE	1.89	297.99	24600	22200	1	0.9	24600	22200	1	0.9	-	-	30	28	22	Carbamidomethylation; TMT6plex; Deamidation (NQ)	94382	Heat shock 70 kDa protein 4L OS=Mus musculus GN=Hspa4l PE=1 SV=2
179	168	Q9Z1B3|PLCB1_MOUSE	2.01	297.55	23900	20900	1	0.87	23900	20900	1	0.87	-	-	23	33	25	Carbamidomethylation; TMT6plex	138396	1-phosphatidylinositol 4 5-bisphosphate phosphodiesterase beta-1 OS=Mus musculus GN=Plcb1 PE=1 SV=2
150	119	tr|K3W4T3|K3W4T3_MOUSE	2.93	296.55	66100	55500	1	0.84	66100	55500	1	0.84	-	-	30	27	23	Carbamidomethylation; TMT6plex; Oxidation (M); Deamidation (NQ)	96427	V-type proton ATPase subunit a OS=Mus musculus GN=Atp6v0a1 PE=1 SV=1
150	122	Q9Z1G4|VPP1_MOUSE	2.93	296.55	66100	55500	1	0.84	66100	55500	1	0.84	-	-	30	27	23	Carbamidomethylation; TMT6plex; Oxidation (M); Deamidation (NQ)	96467	V-type proton ATPase 116 kDa subunit a isoform 1 OS=Mus musculus GN=Atp6v0a1 PE=1 SV=3
223	186	Q60597|ODO1_MOUSE	1.51	296.54	17600	16800	1	0.96	17600	16800	1	0.96	-	-	22	28	20	Carbamidomethylation; TMT6plex; Deamidation (NQ)	116449	2-oxoglutarate dehydrogenase mitochondrial OS=Mus musculus GN=Ogdh PE=1 SV=3
264	200	Q8VDD5|MYH9_MOUSE	1.79	296.39	3570	3610	1	1.01	3570	3610	1	1.01	-	-	3	21	7	TMT6plex	226370	Myosin-9 OS=Mus musculus GN=Myh9 PE=1 SV=4
101	302	P18872|GNAO_MOUSE	5.18	296	141000	136000	1	0.96	141000	136000	1	0.96	-	-	50	22	19	Carbamidomethylation; TMT6plex; Oxidation (M); Deamidation (NQ)	40085	Guanine nucleotide-binding protein G(o) subunit alpha OS=Mus musculus GN=Gnao1 PE=1 SV=3
194	127	Q61598|GDIB_MOUSE	2.39	295.79	36100	35500	1	0.98	36100	35500	1	0.98	-	-	55	25	20	Carbamidomethylation; TMT6plex; Deamidation (NQ)	50537	Rab GDP dissociation inhibitor beta OS=Mus musculus GN=Gdi2 PE=1 SV=1
163	146	P38647|GRP75_MOUSE	0.99	294.9	41500	39800	1	0.96	41500	39800	1	0.96	-	-	39	30	25	Carbamidomethylation; TMT6plex; Oxidation (M); Deamidation (NQ)	73461	Stress-70 protein mitochondrial OS=Mus musculus GN=Hspa9 PE=1 SV=3
118	90	tr|A0A0A6YY47|A0A0A6YY47_MOUSE	1.26	294.82	558	467.429	1	0.84	558	467.429	1	0.84	-	-	2	31	1	TMT6plex	93492	Neural cell adhesion molecule 1 OS=Mus musculus GN=Ncam1 PE=1 SV=1
215	51	P97807|FUMH_MOUSE	2.74	294.35	56100	60400	1	1.08	56100	60400	1	1.08	-	-	47	22	22	TMT6plex; Oxidation (M)	54357	Fumarate hydratase mitochondrial OS=Mus musculus GN=Fh PE=1 SV=3
170	71	Q76MZ3|2AAA_MOUSE	1.11	294.35	32800	31600	1	0.96	32800	31600	1	0.96	-	-	32	24	15	Carbamidomethylation; TMT6plex; Oxidation (M)	65323	Serine/threonine-protein phosphatase 2A 65 kDa regulatory subunit A alpha isoform OS=Mus musculus GN=Ppp2r1a PE=1 SV=3
195	149	Q8CAQ8|MIC60_MOUSE	1.96	294.32	1080	1100	1	1.02	1080	1100	1	1.02	-	-	3	29	2	TMT6plex	83900	MICOS complex subunit Mic60 OS=Mus musculus GN=Immt PE=1 SV=1
145	217	Q64521|GPDM_MOUSE	0.71	293.57	52600	51200	1	0.97	52600	51200	1	0.97	-	-	50	33	32	Carbamidomethylation; TMT6plex; Oxidation (M); Deamidation (NQ)	80954	Glycerol-3-phosphate dehydrogenase mitochondrial OS=Mus musculus GN=Gpd2 PE=1 SV=2
145	222	tr|A2AQR0|A2AQR0_MOUSE	0.71	293.57	52600	51200	1	0.97	52600	51200	1	0.97	-	-	49	33	32	Carbamidomethylation; TMT6plex; Oxidation (M); Deamidation (NQ)	82830	Glycerol-3-phosphate dehydrogenase OS=Mus musculus GN=Gpd2 PE=1 SV=1
166	236	P12960|CNTN1_MOUSE	6.86	293.37	34000	33200	1	0.98	34000	33200	1	0.98	-	-	30	31	27	Carbamidomethylation; TMT6plex; Oxidation (M); Deamidation (NQ)	113388	Contactin-1 OS=Mus musculus GN=Cntn1 PE=1 SV=1
85	130	P16125|LDHB_MOUSE	5.52	292.78	178000	187000	1	1.05	178000	187000	1	1.05	-	-	50	24	20	Carbamidomethylation; TMT6plex; Oxidation (M); Deamidation (NQ)	36572	L-lactate dehydrogenase B chain OS=Mus musculus GN=Ldhb PE=1 SV=2
252	178	Q99P72|RTN4_MOUSE	3.66	292.12	23000	19500	1	0.85	23000	19500	1	0.85	-	-	31	24	22	Carbamidomethylation; TMT6plex; Oxidation (M)	126613	Reticulon-4 OS=Mus musculus GN=Rtn4 PE=1 SV=2
66	138	P63328|PP2BA_MOUSE	2.87	291.99	80000	75500	1	0.94	80000	75500	1	0.94	-	-	35	24	11	Carbamidomethylation; TMT6plex; Oxidation (M); Deamidation (NQ)	58644	Serine/threonine-protein phosphatase 2B catalytic subunit alpha isoform OS=Mus musculus GN=Ppp3ca PE=1 SV=1
116	99	tr|Q5SVJ0|Q5SVJ0_MOUSE	5.91	291.67	34300	26900	1	0.78	34300	26900	1	0.78	-	-	26	24	13	Carbamidomethylation; TMT6plex; Deamidation (NQ)	72903	Calcium/calmodulin-dependent protein kinase II beta isoform CRA_b OS=Mus musculus GN=Camk2b PE=1 SV=1
254	83	P47857|PFKAM_MOUSE	3.38	290.92	24000	23200	1	0.97	24000	23200	1	0.97	-	-	28	25	19	Carbamidomethylation; TMT6plex; Oxidation (M); Deamidation (NQ)	85269	ATP-dependent 6-phosphofructokinase muscle type OS=Mus musculus GN=Pfkm PE=1 SV=3
231	78	D3Z7P3|GLSK_MOUSE	1.48	290.53	37400	36100	1	0.96	37400	36100	1	0.96	-	-	44	23	22	Carbamidomethylation; TMT6plex; Oxidation (M); Deamidation (NQ)	73964	Glutaminase kidney isoform mitochondrial OS=Mus musculus GN=Gls PE=1 SV=1
160	136	Q91VD9|NDUS1_MOUSE	3.81	289.72	44000	44300	1	1.01	44000	44300	1	1.01	-	-	41	30	28	Carbamidomethylation; TMT6plex; Oxidation (M); Deamidation (NQ)	79777	NADH-ubiquinone oxidoreductase 75 kDa subunit mitochondrial OS=Mus musculus GN=Ndufs1 PE=1 SV=2
75	363	Q60932|VDAC1_MOUSE	3.07	289.54	166000	178000	1	1.07	166000	178000	1	1.07	-	-	65	24	20	Carbamidomethylation; TMT6plex; Deamidation (NQ)	32351	Voltage-dependent anion-selective channel protein 1 OS=Mus musculus GN=Vdac1 PE=1 SV=3
220	143	Q8K0U4|HS12A_MOUSE	2.36	289.5	50500	48500	1	0.96	50500	48500	1	0.96	-	-	41	25	23	Carbamidomethylation; TMT6plex; Deamidation (NQ)	74871	Heat shock 70 kDa protein 12A OS=Mus musculus GN=Hspa12a PE=1 SV=1
100	124	tr|Q3TT92|Q3TT92_MOUSE	3.27	288.97	23400	20300	1	0.87	23400	20300	1	0.87	-	-	35	21	14	Carbamidomethylation; TMT6plex; Oxidation (M); Deamidation (NQ)	61780	Dihydropyrimidinase-related protein 3 OS=Mus musculus GN=Dpysl3 PE=1 SV=1
100	125	Q62188|DPYL3_MOUSE	3.27	288.97	23400	20300	1	0.87	23400	20300	1	0.87	-	-	35	21	14	Carbamidomethylation; TMT6plex; Oxidation (M); Deamidation (NQ)	61936	Dihydropyrimidinase-related protein 3 OS=Mus musculus GN=Dpysl3 PE=1 SV=1
100	141	tr|E9PWE8|E9PWE8_MOUSE	3.27	288.97	23400	20300	1	0.87	23400	20300	1	0.87	-	-	29	21	14	Carbamidomethylation; TMT6plex; Oxidation (M); Deamidation (NQ)	73884	Dihydropyrimidinase-related protein 3 OS=Mus musculus GN=Dpysl3 PE=1 SV=1
209	299	Q9QYX7|PCLO_MOUSE	1.55	288.6	11900	10600	1	0.9	11900	10600	1	0.9	-	-	6	30	22	TMT6plex; Deamidation (NQ)	550842	Protein piccolo OS=Mus musculus GN=Pclo PE=1 SV=4
298	244	Q11011|PSA_MOUSE	2	287.99	36300	33300	1	0.92	36300	33300	1	0.92	-	-	35	32	27	Carbamidomethylation; TMT6plex	103325	Puromycin-sensitive aminopeptidase OS=Mus musculus GN=Npepps PE=1 SV=2
172	129	P61922|GABT_MOUSE	1.18	287.77	34500	33700	1	0.98	34500	33700	1	0.98	-	-	53	21	18	Carbamidomethylation; TMT6plex; Oxidation (M)	56452	4-aminobutyrate aminotransferase mitochondrial OS=Mus musculus GN=Abat PE=1 SV=1
214	327	tr|B1ARU4|B1ARU4_MOUSE	1.48	287.58	520	422.656	1	0.81	520	422.656	1	0.81	-	-	0	23	1	TMT6plex; Oxidation (M)	831666	Microtubule-actin cross-linking factor 1 OS=Mus musculus GN=Macf1 PE=1 SV=1
214	328	tr|E9PVY8|E9PVY8_MOUSE	1.48	287.58	520	422.656	1	0.81	520	422.656	1	0.81	-	-	0	23	1	TMT6plex; Oxidation (M)	831893	Microtubule-actin cross-linking factor 1 OS=Mus musculus GN=Macf1 PE=1 SV=2
381	60	P80314|TCPB_MOUSE	1.04	286.35	17200	17500	1	1.01	17200	17500	1	1.01	-	-	38	21	18	Carbamidomethylation; TMT6plex; Oxidation (M)	57477	T-complex protein 1 subunit beta OS=Mus musculus GN=Cct2 PE=1 SV=4
62	603	P43006|EAA2_MOUSE	6.96	286.13	95300	95100	1	1	95300	95100	1	1	-	-	17	18	9	Carbamidomethylation; TMT6plex; Deamidation (NQ)	62030	Excitatory amino acid transporter 2 OS=Mus musculus GN=Slc1a2 PE=1 SV=1
380	199	P12382|PFKAL_MOUSE	1.24	285.55	14000	13000	1	0.93	14000	13000	1	0.93	-	-	16	17	11	Carbamidomethylation; TMT6plex	85360	ATP-dependent 6-phosphofructokinase liver type OS=Mus musculus GN=Pfkl PE=1 SV=4
124	226	tr|E9Q1G8|E9Q1G8_MOUSE	2.48	285.14	355	353.407	1	1	355	353.407	1	1	-	-	3	25	1	Carbamidomethylation; TMT6plex	50649	Septin-7 OS=Mus musculus GN=Sept7 PE=1 SV=2
54	1177	tr|A8DUK4|A8DUK4_MOUSE	17.09	284.72	131000	234000	1	1.79	131000	234000	1	1.79	-	-	31	23	7	TMT6plex; Deamidation (NQ)	15748	Beta-globin OS=Mus musculus GN=Hbbt1 PE=1 SV=1
229	316	tr|D3YZ62|D3YZ62_MOUSE	2.72	284.35	13500	11300	1	0.83	13500	11300	1	0.83	-	-	11	39	21	Carbamidomethylation; TMT6plex	212334	Unconventional myosin-Va OS=Mus musculus GN=Myo5a PE=1 SV=1
229	318	tr|D3Z4J3|D3Z4J3_MOUSE	2.72	284.35	13500	11300	1	0.83	13500	11300	1	0.83	-	-	11	39	21	Carbamidomethylation; TMT6plex	215523	Unconventional myosin-Va OS=Mus musculus GN=Myo5a PE=1 SV=1
106	142	P03995|GFAP_MOUSE	2.54	284.25	62400	66300	1	1.06	62400	66300	1	1.06	-	-	52	26	21	Carbamidomethylation; TMT6plex; Deamidation (NQ)	49900	Glial fibrillary acidic protein OS=Mus musculus GN=Gfap PE=1 SV=4
216	88	P63318|KPCG_MOUSE	2.31	284.18	33100	29200	1	0.88	33100	29200	1	0.88	-	-	34	28	21	Carbamidomethylation; TMT6plex	78358	Protein kinase C gamma type OS=Mus musculus GN=Prkcg PE=1 SV=1
129	82	P20029|GRP78_MOUSE	3.64	283.63	35900	30000	1	0.83	35900	30000	1	0.83	-	-	45	31	26	TMT6plex; Oxidation (M); Deamidation (NQ)	72422	78 kDa glucose-regulated protein OS=Mus musculus GN=Hspa5 PE=1 SV=3
76	238	P11798|KCC2A_MOUSE	5.24	283.57	151000	116000	1	0.77	151000	116000	1	0.77	-	-	30	25	15	Carbamidomethylation; TMT6plex; Oxidation (M); Deamidation (NQ)	54115	Calcium/calmodulin-dependent protein kinase type II subunit alpha OS=Mus musculus GN=Camk2a PE=1 SV=2
76	240	tr|F8WIS9|F8WIS9_MOUSE	5.24	283.57	151000	116000	1	0.77	151000	116000	1	0.77	-	-	30	25	15	Carbamidomethylation; TMT6plex; Oxidation (M); Deamidation (NQ)	55347	Calcium/calmodulin-dependent protein kinase type II subunit alpha OS=Mus musculus GN=Camk2a PE=1 SV=1
272	183	Q61699|HS105_MOUSE	3.33	283.11	18200	14700	1	0.81	18200	14700	1	0.81	-	-	20	18	15	Carbamidomethylation; TMT6plex	96407	Heat shock protein 105 kDa OS=Mus musculus GN=Hsph1 PE=1 SV=2
111	391	P15105|GLNA_MOUSE	2.49	282.97	168000	172000	1	1.03	168000	172000	1	1.03	-	-	54	22	22	Carbamidomethylation; TMT6plex; Oxidation (M); Deamidation (NQ)	42120	Glutamine synthetase OS=Mus musculus GN=Glul PE=1 SV=6
199	301	P28663|SNAB_MOUSE	4.26	282.96	34200	33200	1	0.97	34200	33200	1	0.97	-	-	52	19	13	Carbamidomethylation; TMT6plex	33557	Beta-soluble NSF attachment protein OS=Mus musculus GN=Napb PE=1 SV=2
265	214	P27773|PDIA3_MOUSE	1.94	282.93	49200	44100	1	0.9	49200	44100	1	0.9	-	-	49	26	25	TMT6plex; Oxidation (M); Deamidation (NQ)	56678	Protein disulfide-isomerase A3 OS=Mus musculus GN=Pdia3 PE=1 SV=2
400	177	tr|E9QPD7|E9QPD7_MOUSE	1.22	282.66	9500	10200	1	1.07	9500	10200	1	1.07	-	-	12	17	14	Carbamidomethylation; TMT6plex	129832	Pyruvate carboxylase OS=Mus musculus GN=Pcx PE=1 SV=1
400	180	tr|G5E8R3|G5E8R3_MOUSE	1.22	282.66	9500	10200	1	1.07	9500	10200	1	1.07	-	-	12	17	14	Carbamidomethylation; TMT6plex	129701	Pyruvate carboxylase OS=Mus musculus GN=Pcx PE=1 SV=1
400	181	Q05920|PYC_MOUSE	1.22	282.66	9500	10200	1	1.07	9500	10200	1	1.07	-	-	12	17	14	Carbamidomethylation; TMT6plex	129684	Pyruvate carboxylase mitochondrial OS=Mus musculus GN=Pc PE=1 SV=1
139	201	tr|Q0VF55|Q0VF55_MOUSE	2.18	282.4	12000	10400	1	0.86	12000	10400	1	0.86	-	-	14	35	13	Carbamidomethylation; TMT6plex; Deamidation (NQ)	134360	Calcium-transporting ATPase OS=Mus musculus GN=Atp2b3 PE=1 SV=1
187	231	Q9CZ13|QCR1_MOUSE	4.26	281.55	48600	54200	1	1.11	48600	54200	1	1.11	-	-	42	20	18	Carbamidomethylation; TMT6plex; Oxidation (M); Deamidation (NQ)	52852	Cytochrome b-c1 complex subunit 1 mitochondrial OS=Mus musculus GN=Uqcrc1 PE=1 SV=2
203	247	Q9WV92|E41L3_MOUSE	0.73	281.5	25000	23700	1	0.95	25000	23700	1	0.95	-	-	28	32	25	Carbamidomethylation; TMT6plex	103338	Band 4.1-like protein 3 OS=Mus musculus GN=Epb41l3 PE=1 SV=1
228	190	Q4KMM3|OXR1_MOUSE	1.58	281.48	26000	23400	1	0.9	26000	23400	1	0.9	-	-	28	23	21	TMT6plex; Oxidation (M)	95912	Oxidation resistance protein 1 OS=Mus musculus GN=Oxr1 PE=1 SV=3
248	61	tr|A0A0A6YX18|A0A0A6YX18_MOUSE	1.55	281.05	35000	31800	1	0.91	35000	31800	1	0.91	-	-	40	20	17	Carbamidomethylation; TMT6plex; Oxidation (M)	54109	V-type proton ATPase subunit H OS=Mus musculus GN=Atp6v1h PE=1 SV=1
248	75	Q8BVE3|VATH_MOUSE	1.55	281.05	35000	31800	1	0.91	35000	31800	1	0.91	-	-	39	20	17	Carbamidomethylation; TMT6plex; Oxidation (M)	55855	V-type proton ATPase subunit H OS=Mus musculus GN=Atp6v1h PE=1 SV=1
28	304	P68033|ACTC_MOUSE	16.13	280.88	84000	85600	1	1.02	84000	85600	1	1.02	-	-	21	26	5	Carbamidomethylation; TMT6plex; Oxidation (M); Deamidation (NQ)	42019	Actin alpha cardiac muscle 1 OS=Mus musculus GN=Actc1 PE=1 SV=1
251	421	Q5SQX6|CYFP2_MOUSE	2.1	280.8	12200	10700	1	0.88	12200	10700	1	0.88	-	-	12	33	15	Carbamidomethylation; TMT6plex	145659	Cytoplasmic FMR1-interacting protein 2 OS=Mus musculus GN=Cyfip2 PE=1 SV=2
340	253	tr|A0A1W2P7Y9|A0A1W2P7Y9_MOUSE	4.82	280.55	2500	2070	1	0.83	2500	2070	1	0.83	-	-	2	22	2	TMT6plex	125513	Neuronal cell adhesion molecule OS=Mus musculus GN=Nrcam PE=1 SV=1
326	184	Q9WUA3|PFKAP_MOUSE	1.33	279.91	13300	12800	1	0.96	13300	12800	1	0.96	-	-	18	23	11	Carbamidomethylation; TMT6plex	85455	ATP-dependent 6-phosphofructokinase platelet type OS=Mus musculus GN=Pfkp PE=1 SV=1
326	185	tr|Q8C605|Q8C605_MOUSE	1.33	279.91	13300	12800	1	0.96	13300	12800	1	0.96	-	-	18	23	11	Carbamidomethylation; TMT6plex	85547	ATP-dependent 6-phosphofructokinase OS=Mus musculus GN=Pfkp PE=1 SV=1
259	150	Q8K2B3|SDHA_MOUSE	2.1	279.72	40200	40900	1	1.02	40200	40900	1	1.02	-	-	36	22	21	Carbamidomethylation; TMT6plex; Oxidation (M); Deamidation (NQ)	72585	Succinate dehydrogenase [ubiquinone] flavoprotein subunit mitochondrial OS=Mus musculus GN=Sdha PE=1 SV=1
235	333	tr|A0A1L1SV25|A0A1L1SV25_MOUSE	9.06	279.14	2540	2270	1	0.89	2540	2270	1	0.89	-	-	5	25	4	TMT6plex	107108	Alpha-actinin-4 OS=Mus musculus GN=Actn4 PE=1 SV=1
275	242	P58281|OPA1_MOUSE	5.36	279.08	21300	25600	1	1.2	21300	25600	1	1.2	-	-	23	28	22	Carbamidomethylation; TMT6plex	111339	Dynamin-like 120 kDa protein mitochondrial OS=Mus musculus GN=Opa1 PE=1 SV=1
357	258	Q810U4|NRCAM_MOUSE	0.44	278.85	304	309.231	1	1.02	304	309.231	1	1.02	-	-	1	22	1	TMT6plex; Deamidation (NQ)	138521	Neuronal cell adhesion molecule OS=Mus musculus GN=Nrcam PE=1 SV=2
133	305	Q9CZU6|CISY_MOUSE	2.24	278.5	85200	94100	1	1.1	85200	94100	1	1.1	-	-	25	23	12	TMT6plex; Oxidation (M)	51737	Citrate synthase mitochondrial OS=Mus musculus GN=Cs PE=1 SV=1
204	216	Q8QZT1|THIL_MOUSE	2.37	278.06	57200	56600	1	0.99	57200	56600	1	0.99	-	-	50	22	16	Carbamidomethylation; TMT6plex; Oxidation (M)	44816	Acetyl-CoA acetyltransferase mitochondrial OS=Mus musculus GN=Acat1 PE=1 SV=1
185	286	Q7TQF7|AMPH_MOUSE	1.82	277.76	66500	60400	1	0.91	66500	60400	1	0.91	-	-	33	22	21	Carbamidomethylation; TMT6plex; Oxidation (M); Deamidation (NQ)	75013	Amphiphysin OS=Mus musculus GN=Amph PE=1 SV=1
185	287	tr|A0A0G2JEG8|A0A0G2JEG8_MOUSE	1.82	277.76	66500	60400	1	0.91	66500	60400	1	0.91	-	-	33	22	21	Carbamidomethylation; TMT6plex; Oxidation (M); Deamidation (NQ)	75340	Amphiphysin OS=Mus musculus GN=Amph PE=1 SV=1
250	445	tr|S4R2K9|S4R2K9_MOUSE	1.22	276.83	3100	3240	1	1.05	3100	3240	1	1.05	-	-	3	24	7	TMT6plex	284642	Ankyrin-3 (Fragment) OS=Mus musculus GN=Ank3 PE=1 SV=1
197	173	Q8BMF4|ODP2_MOUSE	1.69	276.64	72400	79500	1	1.1	72400	79500	1	1.1	-	-	38	20	19	Carbamidomethylation; TMT6plex; Oxidation (M); Deamidation (NQ)	67942	Dihydrolipoyllysine-residue acetyltransferase component of pyruvate dehydrogenase complex mitochondrial OS=Mus musculus GN=Dlat PE=1 SV=2
81	332	P48962|ADT1_MOUSE	3.7	276.58	105000	107000	1	1.02	105000	107000	1	1.02	-	-	26	22	7	Carbamidomethylation; TMT6plex; Deamidation (NQ)	32904	ADP/ATP translocase 1 OS=Mus musculus GN=Slc25a4 PE=1 SV=4
258	131	tr|Q3TMU8|Q3TMU8_MOUSE	1.28	276.3	14000	13200	1	0.94	14000	13200	1	0.94	-	-	28	17	13	Carbamidomethylation; TMT6plex; Deamidation (NQ)	61928	Dihydropyrimidinase-like 4 OS=Mus musculus GN=Dpysl4 PE=1 SV=1
258	132	O35098|DPYL4_MOUSE	1.28	276.3	14000	13200	1	0.94	14000	13200	1	0.94	-	-	28	17	13	Carbamidomethylation; TMT6plex; Deamidation (NQ)	61962	Dihydropyrimidinase-related protein 4 OS=Mus musculus GN=Dpysl4 PE=1 SV=1
258	134	tr|A0A0R4J1N0|A0A0R4J1N0_MOUSE	1.28	276.3	14000	13200	1	0.94	14000	13200	1	0.94	-	-	27	17	13	Carbamidomethylation; TMT6plex; Deamidation (NQ)	64303	Dihydropyrimidinase-related protein 4 OS=Mus musculus GN=Dpysl4 PE=1 SV=1
141	371	P30275|KCRU_MOUSE	2.67	276.28	56000	61400	1	1.1	56000	61400	1	1.1	-	-	38	19	13	Carbamidomethylation; TMT6plex; Deamidation (NQ)	47004	Creatine kinase U-type mitochondrial OS=Mus musculus GN=Ckmt1 PE=1 SV=1
183	165	O08749|DLDH_MOUSE	2.49	275.49	76800	87200	1	1.14	76800	87200	1	1.14	-	-	48	21	20	Carbamidomethylation; TMT6plex; Oxidation (M); Deamidation (NQ)	54272	Dihydrolipoyl dehydrogenase mitochondrial OS=Mus musculus GN=Dld PE=1 SV=2
64	1180	P02088|HBB1_MOUSE	58.95	274.96	14700	23400	1	1.59	14700	23400	1	1.59	-	-	15	19	2	Carbamidomethylation; TMT6plex; Deamidation (NQ)	15840	Hemoglobin subunit beta-1 OS=Mus musculus GN=Hbb-b1 PE=1 SV=2
286	205	tr|E9Q7L0|E9Q7L0_MOUSE	1.25	274.23	5170	5330	1	1.03	5170	5330	1	1.03	-	-	10	17	8	Carbamidomethylation; TMT6plex	116600	Oxoglutarate dehydrogenase-like OS=Mus musculus GN=Ogdhl PE=1 SV=1
225	151	Q8BFR5|EFTU_MOUSE	1.88	274.07	37500	33200	1	0.89	37500	33200	1	0.89	-	-	52	23	21	Carbamidomethylation; TMT6plex; Oxidation (M)	49508	Elongation factor Tu mitochondrial OS=Mus musculus GN=Tufm PE=1 SV=1
168	738	O54983|CRYM_MOUSE	3.09	273.72	64600	61400	1	0.95	64600	61400	1	0.95	-	-	51	17	16	Carbamidomethylation; TMT6plex; Oxidation (M)	33523	Ketimine reductase mu-crystallin OS=Mus musculus GN=Crym PE=1 SV=1
266	269	P14824|ANXA6_MOUSE	1.18	273.59	17400	17500	1	1.01	17400	17500	1	1.01	-	-	36	24	21	Carbamidomethylation; TMT6plex	75885	Annexin A6 OS=Mus musculus GN=Anxa6 PE=1 SV=3
401	179	Q3UHJ0|AAK1_MOUSE	2.15	273.34	14200	12700	1	0.89	14200	12700	1	0.89	-	-	22	17	14	Carbamidomethylation; TMT6plex	103346	AP2-associated protein kinase 1 OS=Mus musculus GN=Aak1 PE=1 SV=2
74	401	P62259|1433E_MOUSE	2.42	272.96	57100	50500	1	0.88	57100	50500	1	0.88	-	-	42	22	9	TMT6plex; Oxidation (M); Acetylation (Protein N-term); Deamidation (NQ)	29174	14-3-3 protein epsilon OS=Mus musculus GN=Ywhae PE=1 SV=1
115	659	P17751|TPIS_MOUSE	1.73	272.95	235000	223000	1	0.95	235000	223000	1	0.95	-	-	56	13	13	Carbamidomethylation; TMT6plex; Oxidation (M); Deamidation (NQ)	32192	Triosephosphate isomerase OS=Mus musculus GN=Tpi1 PE=1 SV=4
89	370	P14152|MDHC_MOUSE	0.3	272.77	203000	202000	1	1	203000	202000	1	1	-	-	47	19	16	Carbamidomethylation; TMT6plex; Oxidation (M); Deamidation (NQ)	36511	Malate dehydrogenase cytoplasmic OS=Mus musculus GN=Mdh1 PE=1 SV=3
263	235	Q921I1|TRFE_MOUSE	1.45	272.72	991	1150	1	1.16	991	1150	1	1.16	-	-	1	28	2	Carbamidomethylation; TMT6plex	76724	Serotransferrin OS=Mus musculus GN=Tf PE=1 SV=1
334	263	P11983|TCPA_MOUSE	0.94	272.45	23500	22300	1	0.95	23500	22300	1	0.95	-	-	38	24	19	Carbamidomethylation; TMT6plex	60449	T-complex protein 1 subunit alpha OS=Mus musculus GN=Tcp1 PE=1 SV=3
367	251	tr|B1AQX9|B1AQX9_MOUSE	2.98	272.31	10100	9320	1	0.92	10100	9320	1	0.92	-	-	17	23	18	Carbamidomethylation; TMT6plex	130609	SRC kinase-signaling inhibitor 1 OS=Mus musculus GN=Srcin1 PE=1 SV=1
198	262	Q9D051|ODPB_MOUSE	3.06	271.39	79900	89900	1	1.12	79900	89900	1	1.12	-	-	58	19	17	Carbamidomethylation; TMT6plex; Oxidation (M); Deamidation (NQ)	38937	Pyruvate dehydrogenase E1 component subunit beta mitochondrial OS=Mus musculus GN=Pdhb PE=1 SV=1
358	245	Q61301|CTNA2_MOUSE	3.96	271.22	7780	6520	1	0.84	7780	6520	1	0.84	-	-	13	15	10	TMT6plex; Oxidation (M); Deamidation (NQ)	105286	Catenin alpha-2 OS=Mus musculus GN=Ctnna2 PE=1 SV=3
358	246	tr|E0CXB9|E0CXB9_MOUSE	3.96	271.22	7780	6520	1	0.84	7780	6520	1	0.84	-	-	13	15	10	TMT6plex; Oxidation (M); Deamidation (NQ)	106730	Catenin alpha-2 OS=Mus musculus GN=Ctnna2 PE=1 SV=1
315	135	Q8BWF0|SSDH_MOUSE	2.22	271.06	31200	34000	1	1.09	31200	34000	1	1.09	-	-	36	16	16	Carbamidomethylation; TMT6plex; Deamidation (NQ)	55968	Succinate-semialdehyde dehydrogenase mitochondrial OS=Mus musculus GN=Aldh5a1 PE=1 SV=1
63	390	P63101|1433Z_MOUSE	1.95	271.05	284000	270000	1	0.95	284000	270000	1	0.95	-	-	49	25	15	Carbamidomethylation; TMT6plex; Oxidation (M); Deamidation (NQ)	27771	14-3-3 protein zeta/delta OS=Mus musculus GN=Ywhaz PE=1 SV=1
134	337	Q8BZ98|DYN3_MOUSE	0.88	270.39	5780	5370	1	0.93	5780	5370	1	0.93	-	-	9	24	8	Carbamidomethylation; TMT6plex	97190	Dynamin-3 OS=Mus musculus GN=Dnm3 PE=1 SV=1
134	339	tr|E9QLL2|E9QLL2_MOUSE	0.88	270.39	5780	5370	1	0.93	5780	5370	1	0.93	-	-	9	24	8	Carbamidomethylation; TMT6plex	97274	Dynamin-3 OS=Mus musculus GN=Dnm3 PE=1 SV=1
91	1843	tr|Q91VB8|Q91VB8_MOUSE	21.94	269.97	331000	594000	1	1.79	331000	594000	1	1.79	-	-	89	16	15	Carbamidomethylation; TMT6plex; Oxidation (M); Deamidation (NQ)	15112	Alpha globin 1 OS=Mus musculus GN=Hba-a1 PE=1 SV=1
238	207	tr|F7AAP4|F7AAP4_MOUSE	4.79	269.91	7850	6580	1	0.84	7850	6580	1	0.84	-	-	7	24	8	Carbamidomethylation; TMT6plex	128562	Calcium-transporting ATPase OS=Mus musculus GN=Atp2b4 PE=1 SV=1
238	208	tr|E9Q828|E9Q828_MOUSE	4.79	269.91	7850	6580	1	0.84	7850	6580	1	0.84	-	-	7	24	8	Carbamidomethylation; TMT6plex	129256	Calcium-transporting ATPase OS=Mus musculus GN=Atp2b4 PE=1 SV=1
105	758	P62874|GBB1_MOUSE	1.66	268.09	39600	42600	1	1.08	39600	42600	1	1.08	-	-	25	16	5	Carbamidomethylation; TMT6plex; Oxidation (M); Deamidation (NQ)	37377	Guanine nucleotide-binding protein G(I)/G(S)/G(T) subunit beta-1 OS=Mus musculus GN=Gnb1 PE=1 SV=3
316	326	P19246|NFH_MOUSE	2.84	267.02	20000	22200	1	1.11	20000	22200	1	1.11	-	-	15	22	15	Carbamidomethylation; TMT6plex; Deamidation (NQ)	116994	Neurofilament heavy polypeptide OS=Mus musculus GN=Nefh PE=1 SV=3
109	276	P46096|SYT1_MOUSE	3.07	266.91	110000	94100	1	0.86	110000	94100	1	0.86	-	-	37	21	14	Carbamidomethylation; TMT6plex; Oxidation (M); Deamidation (NQ)	47418	Synaptotagmin-1 OS=Mus musculus GN=Syt1 PE=1 SV=1
108	446	P61982|1433G_MOUSE	4.81	266.83	79300	62800	1	0.79	79300	62800	1	0.79	-	-	50	18	9	Carbamidomethylation; TMT6plex; Deamidation (NQ)	28303	14-3-3 protein gamma OS=Mus musculus GN=Ywhag PE=1 SV=2
212	303	Q9Z2Q6|SEPT5_MOUSE	1.75	266.7	48400	46200	1	0.95	48400	46200	1	0.95	-	-	47	20	15	Carbamidomethylation; TMT6plex; Oxidation (M); Deamidation (NQ)	42748	Septin-5 OS=Mus musculus GN=Sept5 PE=1 SV=2
122	722	Q9DBJ1|PGAM1_MOUSE	1.66	266.56	73800	74600	1	1.01	73800	74600	1	1.01	-	-	58	20	15	Carbamidomethylation; TMT6plex; Oxidation (M)	28832	Phosphoglycerate mutase 1 OS=Mus musculus GN=Pgam1 PE=1 SV=3
127	701	P68254|1433T_MOUSE	4.5	266.43	45700	45400	1	0.99	45700	45400	1	0.99	-	-	40	20	9	Carbamidomethylation; TMT6plex; Oxidation (M); Deamidation (NQ)	27778	14-3-3 protein theta OS=Mus musculus GN=Ywhaq PE=1 SV=1
127	712	tr|F6YY69|F6YY69_MOUSE	4.5	266.43	45700	45400	1	0.99	45700	45400	1	0.99	-	-	34	20	9	Carbamidomethylation; TMT6plex; Oxidation (M); Deamidation (NQ)	32341	14-3-3 protein theta (Fragment) OS=Mus musculus GN=Ywhaq PE=1 SV=1
127	723	tr|F6VW30|F6VW30_MOUSE	4.5	266.43	45700	45400	1	0.99	45700	45400	1	0.99	-	-	32	20	9	Carbamidomethylation; TMT6plex; Oxidation (M); Deamidation (NQ)	34349	14-3-3 protein theta (Fragment) OS=Mus musculus GN=Ywhaq PE=1 SV=1
337	283	Q8K310|MATR3_MOUSE	1.3	266.29	11400	10400	1	0.91	11400	10400	1	0.91	-	-	19	20	16	Carbamidomethylation; TMT6plex; Deamidation (NQ)	94630	Matrin-3 OS=Mus musculus GN=Matr3 PE=1 SV=1
276	241	Q9ES97|RTN3_MOUSE	2.07	266.26	24600	21400	1	0.87	24600	21400	1	0.87	-	-	26	26	21	Carbamidomethylation; TMT6plex	103879	Reticulon-3 OS=Mus musculus GN=Rtn3 PE=1 SV=2
420	187	Q8BMS1|ECHA_MOUSE	0.97	266.07	15100	15100	1	1	15100	15100	1	1	-	-	25	21	17	Carbamidomethylation; TMT6plex	82670	Trifunctional enzyme subunit alpha mitochondrial OS=Mus musculus GN=Hadha PE=1 SV=1
324	233	tr|E9Q912|E9Q912_MOUSE	5.31	265.92	367	204.164	1	0.56	367	204.164	1	0.56	-	-	3	23	1	TMT6plex	66077	RAP1 GTP-GDP dissociation stimulator 1 OS=Mus musculus GN=Rap1gds1 PE=1 SV=1
394	351	tr|E9Q586|E9Q586_MOUSE	1.26	265.53	15900	15800	1	0.99	15900	15800	1	0.99	-	-	16	25	18	TMT6plex; Deamidation (NQ)	136848	Dynactin subunit 1 OS=Mus musculus GN=Dctn1 PE=1 SV=1
155	432	Q9D6R2|IDH3A_MOUSE	0.64	265.39	77400	79500	1	1.03	77400	79500	1	1.03	-	-	46	16	14	Carbamidomethylation; TMT6plex; Oxidation (M)	39639	Isocitrate dehydrogenase [NAD] subunit alpha mitochondrial OS=Mus musculus GN=Idh3a PE=1 SV=1
155	433	tr|A0A1L1STE6|A0A1L1STE6_MOUSE	0.64	265.39	77400	79500	1	1.03	77400	79500	1	1.03	-	-	43	16	14	Carbamidomethylation; TMT6plex; Oxidation (M)	41520	Isocitrate dehydrogenase [NAD] subunit mitochondrial OS=Mus musculus GN=Idh3a PE=1 SV=1
291	296	Q91V14|S12A5_MOUSE	2.61	265.39	26900	23400	1	0.87	26900	23400	1	0.87	-	-	13	22	13	Carbamidomethylation; TMT6plex	126271	Solute carrier family 12 member 5 OS=Mus musculus GN=Slc12a5 PE=1 SV=2
97	466	P51881|ADT2_MOUSE	4.78	265.25	63600	68900	1	1.08	63600	68900	1	1.08	-	-	26	23	8	Carbamidomethylation; TMT6plex; Deamidation (NQ)	32931	ADP/ATP translocase 2 OS=Mus musculus GN=Slc25a5 PE=1 SV=3
318	319	F6SEU4|SYGP1_MOUSE	6.78	264.78	12100	8960	1	0.74	12100	8960	1	0.74	-	-	16	23	19	Carbamidomethylation; TMT6plex; Oxidation (M)	148238	Ras/Rap GTPase-activating protein SynGAP OS=Mus musculus GN=Syngap1 PE=1 SV=2
392	352	tr|E9PUM4|E9PUM4_MOUSE	1.25	264.49	7170	6490	1	0.91	7170	6490	1	0.91	-	-	7	23	14	Carbamidomethylation; TMT6plex; Deamidation (NQ)	271665	Talin-2 OS=Mus musculus GN=Tln2 PE=1 SV=1
392	353	tr|A0A1L1SQ51|A0A1L1SQ51_MOUSE	1.25	264.49	7170	6490	1	0.91	7170	6490	1	0.91	-	-	7	23	14	Carbamidomethylation; TMT6plex; Deamidation (NQ)	271924	Talin-2 OS=Mus musculus GN=Tln2 PE=1 SV=1
280	160	Q9D0K2|SCOT1_MOUSE	5.83	264.23	39500	39200	1	0.99	39500	39200	1	0.99	-	-	36	15	15	Carbamidomethylation; TMT6plex; Deamidation (NQ)	55989	Succinyl-CoA:3-ketoacid coenzyme A transferase 1 mitochondrial OS=Mus musculus GN=Oxct1 PE=1 SV=1
374	197	P70168|IMB1_MOUSE	1.7	263.93	16000	14300	1	0.89	16000	14300	1	0.89	-	-	25	18	18	Carbamidomethylation; TMT6plex; Oxidation (M)	97184	Importin subunit beta-1 OS=Mus musculus GN=Kpnb1 PE=1 SV=2
241	275	O08539|BIN1_MOUSE	0.47	263.42	38300	38300	1	1	38300	38300	1	1	-	-	38	20	17	Carbamidomethylation; TMT6plex; Oxidation (M); Deamidation (NQ)	64470	Myc box-dependent-interacting protein 1 OS=Mus musculus GN=Bin1 PE=1 SV=1
153	851	Q9R0P9|UCHL1_MOUSE	2.04	263.37	160000	151000	1	0.94	160000	151000	1	0.94	-	-	67	13	12	Carbamidomethylation; TMT6plex; Oxidation (M); Deamidation (NQ)	24838	Ubiquitin carboxyl-terminal hydrolase isozyme L1 OS=Mus musculus GN=Uchl1 PE=1 SV=1
59	1412	P17742|PPIA_MOUSE	1.86	263.28	369000	363000	1	0.98	369000	363000	1	0.98	-	-	78	17	14	Carbamidomethylation; TMT6plex; Oxidation (M); Deamidation (NQ)	17971	Peptidyl-prolyl cis-trans isomerase A OS=Mus musculus GN=Ppia PE=1 SV=2
138	467	P10126|EF1A1_MOUSE	1.7	263.11	52200	50000	1	0.96	52200	50000	1	0.96	-	-	25	15	9	Carbamidomethylation; TMT6plex; Oxidation (M)	50114	Elongation factor 1-alpha 1 OS=Mus musculus GN=Eef1a1 PE=1 SV=3
196	407	Q61696|HS71A_MOUSE	2.2	262.33	1790	1820	1	1.02	1790	1820	1	1.02	-	-	6	19	4	TMT6plex; Deamidation (NQ)	70079	Heat shock 70 kDa protein 1A OS=Mus musculus GN=Hspa1a PE=1 SV=2
459	257	Q9EQH3|VPS35_MOUSE	3.12	261.98	12500	10500	1	0.84	12500	10500	1	0.84	-	-	19	17	16	Carbamidomethylation; TMT6plex	91713	Vacuolar protein sorting-associated protein 35 OS=Mus musculus GN=Vps35 PE=1 SV=1
693	256	Q8CGY8|OGT1_MOUSE	2.93	261.11	7720	6550	1	0.85	7720	6550	1	0.85	-	-	12	11	11	TMT6plex	116952	UDP-N-acetylglucosamine--peptide N-acetylglucosaminyltransferase 110 kDa subunit OS=Mus musculus GN=Ogt PE=1 SV=2
273	307	tr|B2M1R6|B2M1R6_MOUSE	1.76	261.08	479	457.28	1	0.95	479	457.28	1	0.95	-	-	3	20	1	TMT6plex	48562	Heterogeneous nuclear ribonucleoprotein K OS=Mus musculus GN=Hnrnpk PE=1 SV=1
501	237	P80316|TCPE_MOUSE	1.15	261.03	16600	17200	1	1.04	16600	17200	1	1.04	-	-	31	18	15	Carbamidomethylation; TMT6plex; Deamidation (NQ)	59624	T-complex protein 1 subunit epsilon OS=Mus musculus GN=Cct5 PE=1 SV=1
226	376	tr|Q3UYN2|Q3UYN2_MOUSE	3.74	260.19	38000	34900	1	0.92	38000	34900	1	0.92	-	-	31	17	15	Carbamidomethylation; TMT6plex; Oxidation (M)	61653	Copine-6 OS=Mus musculus GN=Cpne6 PE=1 SV=1
226	377	Q9Z140|CPNE6_MOUSE	3.74	260.19	38000	34900	1	0.92	38000	34900	1	0.92	-	-	31	17	15	Carbamidomethylation; TMT6plex; Oxidation (M)	61781	Copine-6 OS=Mus musculus GN=Cpne6 PE=1 SV=1
385	306	Q9EQF6|DPYL5_MOUSE	4.56	260.17	27700	22000	1	0.79	27700	22000	1	0.79	-	-	41	19	19	Carbamidomethylation; TMT6plex; Deamidation (NQ)	61516	Dihydropyrimidinase-related protein 5 OS=Mus musculus GN=Dpysl5 PE=1 SV=1
303	289	tr|A2AS98|A2AS98_MOUSE	1.39	259.82	20000	18200	1	0.91	20000	18200	1	0.91	-	-	21	25	21	Carbamidomethylation; TMT6plex; Deamidation (NQ)	129511	Nck-associated protein 1 OS=Mus musculus GN=Nckap1 PE=1 SV=1
303	292	P28660|NCKP1_MOUSE	1.39	259.82	20000	18200	1	0.91	20000	18200	1	0.91	-	-	21	25	21	Carbamidomethylation; TMT6plex; Deamidation (NQ)	128784	Nck-associated protein 1 OS=Mus musculus GN=Nckap1 PE=1 SV=2
308	313	Q80SW1|SAHH2_MOUSE	1.17	259.09	5280	4810	1	0.91	5280	4810	1	0.91	-	-	8	20	5	Carbamidomethylation; TMT6plex	58952	S-adenosylhomocysteine hydrolase-like protein 1 OS=Mus musculus GN=Ahcyl1 PE=1 SV=1
262	281	P23819|GRIA2_MOUSE	1	258.92	582	672.19	1	1.15	582	672.19	1	1.15	-	-	2	26	1	TMT6plex	98662	Glutamate receptor 2 OS=Mus musculus GN=Gria2 PE=1 SV=3
135	367	P35486|ODPA_MOUSE	1.31	258.46	74200	81200	1	1.09	74200	81200	1	1.09	-	-	55	24	24	Carbamidomethylation; TMT6plex; Oxidation (M); Deamidation (NQ)	43232	Pyruvate dehydrogenase E1 component subunit alpha somatic form mitochondrial OS=Mus musculus GN=Pdha1 PE=1 SV=1
158	543	tr|Q6GT24|Q6GT24_MOUSE	3.64	258.29	883	1100	1	1.24	883	1100	1	1.24	-	-	4	17	1	TMT6plex	24827	Peroxiredoxin 6 OS=Mus musculus GN=Prdx6 PE=1 SV=1
354	255	Q9QXS6|DREB_MOUSE	1.27	258.19	2260	2020	1	0.89	2260	2020	1	0.89	-	-	4	14	2	Carbamidomethylation; TMT6plex	77287	Drebrin OS=Mus musculus GN=Dbn1 PE=1 SV=4
148	436	P48453|PP2BB_MOUSE	1.69	258.17	7700	6940	1	0.9	7700	6940	1	0.9	-	-	14	17	6	Carbamidomethylation; TMT6plex	59174	Serine/threonine-protein phosphatase 2B catalytic subunit beta isoform OS=Mus musculus GN=Ppp3cb PE=1 SV=2
148	438	tr|E0CZ78|E0CZ78_MOUSE	1.69	258.17	7700	6940	1	0.9	7700	6940	1	0.9	-	-	14	17	6	Carbamidomethylation; TMT6plex	59074	Serine/threonine-protein phosphatase OS=Mus musculus GN=Ppp3cb PE=1 SV=1
356	378	Q8R0Y6|AL1L1_MOUSE	0.7	258.06	10300	10000	1	0.97	10300	10000	1	0.97	-	-	24	21	17	Carbamidomethylation; TMT6plex	98709	Cytosolic 10-formyltetrahydrofolate dehydrogenase OS=Mus musculus GN=Aldh1l1 PE=1 SV=1
159	365	P06151|LDHA_MOUSE	2.69	257.72	80300	67900	1	0.85	80300	67900	1	0.85	-	-	46	21	14	Carbamidomethylation; TMT6plex; Oxidation (M); Deamidation (NQ)	36499	L-lactate dehydrogenase A chain OS=Mus musculus GN=Ldha PE=1 SV=3
159	366	tr|Q564E2|Q564E2_MOUSE	2.69	257.72	80300	67900	1	0.85	80300	67900	1	0.85	-	-	46	21	14	Carbamidomethylation; TMT6plex; Oxidation (M); Deamidation (NQ)	36499	L-lactate dehydrogenase OS=Mus musculus GN=Ldha PE=1 SV=1
159	368	tr|A0A1B0GSX0|A0A1B0GSX0_MOUSE	2.69	257.72	80300	67900	1	0.85	80300	67900	1	0.85	-	-	42	21	14	Carbamidomethylation; TMT6plex; Oxidation (M); Deamidation (NQ)	39758	L-lactate dehydrogenase OS=Mus musculus GN=Ldha PE=1 SV=1
413	220	P47738|ALDH2_MOUSE	1.5	257.59	15400	17000	1	1.11	15400	17000	1	1.11	-	-	33	17	13	Carbamidomethylation; TMT6plex	56538	Aldehyde dehydrogenase mitochondrial OS=Mus musculus GN=Aldh2 PE=1 SV=1
277	372	P61979|HNRPK_MOUSE	1.11	257.57	329	280.577	1	0.85	329	280.577	1	0.85	-	-	8	20	1	Carbamidomethylation; TMT6plex	50976	Heterogeneous nuclear ribonucleoprotein K OS=Mus musculus GN=Hnrnpk PE=1 SV=1
174	373	Q61644|PACN1_MOUSE	2.31	257.1	56900	51700	1	0.91	56900	51700	1	0.91	-	-	52	26	19	Carbamidomethylation; TMT6plex; Deamidation (NQ)	50575	Protein kinase C and casein kinase substrate in neurons protein 1 OS=Mus musculus GN=Pacsin1 PE=1 SV=1
363	297	tr|A0A0R4IZX5|A0A0R4IZX5_MOUSE	3.3	256.97	18000	20100	1	1.12	18000	20100	1	1.12	-	-	12	13	13	Carbamidomethylation; TMT6plex	137175	Neurocan core protein OS=Mus musculus GN=Ncan PE=1 SV=1
363	298	P55066|NCAN_MOUSE	3.3	256.97	18000	20100	1	1.12	18000	20100	1	1.12	-	-	12	13	13	Carbamidomethylation; TMT6plex	137200	Neurocan core protein OS=Mus musculus GN=Ncan PE=1 SV=1
192	382	P10637|TAU_MOUSE	5.35	256.95	544	303.859	1	0.56	544	303.859	1	0.56	-	-	1	16	1	TMT6plex	76243	Microtubule-associated protein tau OS=Mus musculus GN=Mapt PE=1 SV=3
192	383	tr|A0A0A0MQC7|A0A0A0MQC7_MOUSE	5.35	256.95	544	303.859	1	0.56	544	303.859	1	0.56	-	-	1	16	1	TMT6plex	76259	Microtubule-associated protein OS=Mus musculus GN=Mapt PE=1 SV=1
192	386	tr|A2A5Y6|A2A5Y6_MOUSE	5.35	256.95	544	303.859	1	0.56	544	303.859	1	0.56	-	-	1	16	1	TMT6plex	78086	Microtubule-associated protein OS=Mus musculus GN=Mapt PE=1 SV=1
193	415	Q9Z1G3|VATC1_MOUSE	1.24	256.93	77100	72100	1	0.94	77100	72100	1	0.94	-	-	50	24	22	Carbamidomethylation; TMT6plex; Oxidation (M); Deamidation (NQ)	43888	V-type proton ATPase subunit C 1 OS=Mus musculus GN=Atp6v1c1 PE=1 SV=4
310	227	Q9DB77|QCR2_MOUSE	3.2	256.7	33000	32600	1	0.99	33000	32600	1	0.99	-	-	43	16	15	TMT6plex; Oxidation (M); Deamidation (NQ)	48235	Cytochrome b-c1 complex subunit 2 mitochondrial OS=Mus musculus GN=Uqcrc2 PE=1 SV=1
486	277	P80317|TCPZ_MOUSE	1.38	256.68	7310	7670	1	1.05	7310	7670	1	1.05	-	-	16	18	8	TMT6plex	58004	T-complex protein 1 subunit zeta OS=Mus musculus GN=Cct6a PE=1 SV=3
384	359	tr|Q3V117|Q3V117_MOUSE	1.04	255.89	10600	9810	1	0.93	10600	9810	1	0.93	-	-	17	16	14	Carbamidomethylation; TMT6plex	120795	ATP-citrate synthase OS=Mus musculus GN=Acly PE=1 SV=1
384	360	Q91V92|ACLY_MOUSE	1.04	255.89	10600	9810	1	0.93	10600	9810	1	0.93	-	-	17	16	14	Carbamidomethylation; TMT6plex	119728	ATP-citrate synthase OS=Mus musculus GN=Acly PE=1 SV=1
333	273	P40124|CAP1_MOUSE	2.18	255.87	19500	17000	1	0.87	19500	17000	1	0.87	-	-	42	17	16	Carbamidomethylation; TMT6plex; Oxidation (M); Deamidation (NQ)	51565	Adenylyl cyclase-associated protein 1 OS=Mus musculus GN=Cap1 PE=1 SV=4
439	480	Q9R1T4|SEPT6_MOUSE	3.24	255.78	5660	5550	1	0.98	5660	5550	1	0.98	-	-	21	16	4	Carbamidomethylation; TMT6plex	49620	Septin-6 OS=Mus musculus GN=Sept6 PE=1 SV=4
67	1113	tr|F6RT34|F6RT34_MOUSE	27.58	255.5	31600	38000	1	1.2	31600	38000	1	1.2	-	-	13	20	4	TMT6plex	23205	Myelin basic protein (Fragment) OS=Mus musculus GN=Mbp PE=1 SV=1
352	265	Q91YT0|NDUV1_MOUSE	4.73	255.41	21100	22400	1	1.06	21100	22400	1	1.06	-	-	46	20	17	Carbamidomethylation; TMT6plex; Oxidation (M)	50834	NADH dehydrogenase [ubiquinone] flavoprotein 1 mitochondrial OS=Mus musculus GN=Ndufv1 PE=1 SV=1
352	268	tr|D3YUM1|D3YUM1_MOUSE	4.73	255.41	21100	22400	1	1.06	21100	22400	1	1.06	-	-	47	20	17	Carbamidomethylation; TMT6plex; Oxidation (M)	49913	NADH dehydrogenase [ubiquinone] flavoprotein 1 mitochondrial OS=Mus musculus GN=Ndufv1 PE=1 SV=1
349	308	tr|A0A0U1RP81|A0A0U1RP81_MOUSE	2.38	254.84	633	540.259	1	0.85	633	540.259	1	0.85	-	-	5	16	1	TMT6plex	53717	MICOS complex subunit MIC60 OS=Mus musculus GN=Immt PE=1 SV=1
176	1635	Q91XV3|BASP1_MOUSE	16.67	254.65	152000	96500	1	0.64	152000	96500	1	0.64	-	-	80	13	13	TMT6plex; Deamidation (NQ)	22087	Brain acid soluble protein 1 OS=Mus musculus GN=Basp1 PE=1 SV=3
606	331	Q9DB05|SNAA_MOUSE	0.88	254.17	3310	3340	1	1.01	3310	3340	1	1.01	-	-	32	13	7	Carbamidomethylation; TMT6plex	33190	Alpha-soluble NSF attachment protein OS=Mus musculus GN=Napa PE=1 SV=1
343	343	Q9WUB3|PYGM_MOUSE	1.47	254.17	6750	7550	1	1.12	6750	7550	1	1.12	-	-	14	23	11	TMT6plex	97286	Glycogen phosphorylase muscle form OS=Mus musculus GN=Pygm PE=1 SV=3
361	338	tr|Q3U4W8|Q3U4W8_MOUSE	1.66	253.97	18000	18000	1	1	18000	18000	1	1	-	-	28	20	18	Carbamidomethylation; TMT6plex; Deamidation (NQ)	93355	Ubiquitinyl hydrolase 1 OS=Mus musculus GN=Usp5 PE=1 SV=1
361	340	P56399|UBP5_MOUSE	1.66	253.97	18000	18000	1	1	18000	18000	1	1	-	-	27	20	18	Carbamidomethylation; TMT6plex; Deamidation (NQ)	95833	Ubiquitin carboxyl-terminal hydrolase 5 OS=Mus musculus GN=Usp5 PE=1 SV=1
370	450	tr|B1AQZ0|B1AQZ0_MOUSE	1.54	253.27	14300	14000	1	0.98	14300	14000	1	0.98	-	-	34	19	12	Carbamidomethylation; TMT6plex; Deamidation (NQ)	55874	Septin-8 OS=Mus musculus GN=Sept8 PE=1 SV=1
245	429	tr|Q91VA7|Q91VA7_MOUSE	1.05	252.66	57100	61200	1	1.07	57100	61200	1	1.07	-	-	43	17	14	Carbamidomethylation; TMT6plex; Oxidation (M)	42195	Isocitrate dehydrogenase [NAD] subunit mitochondrial OS=Mus musculus GN=Idh3b PE=1 SV=1
79	928	P14094|AT1B1_MOUSE	2.04	252.36	556000	501000	1	0.9	556000	501000	1	0.9	-	-	45	21	16	Carbamidomethylation; TMT6plex; Oxidation (M); Deamidation (NQ)	35195	Sodium/potassium-transporting ATPase subunit beta-1 OS=Mus musculus GN=Atp1b1 PE=1 SV=1
65	975	P60202|MYPR_MOUSE	29.11	251.97	472000	896000	1	1.9	472000	896000	1	1.9	-	-	33	20	17	Carbamidomethylation; TMT6plex; Oxidation (M); Deamidation (NQ)	30077	Myelin proteolipid protein OS=Mus musculus GN=Plp1 PE=1 SV=2
112	729	Q9CQV8|1433B_MOUSE	1.43	251.86	35000	32000	1	0.91	35000	32000	1	0.91	-	-	35	18	6	TMT6plex; Deamidation (NQ)	28086	14-3-3 protein beta/alpha OS=Mus musculus GN=Ywhab PE=1 SV=3
255	2336	Q91ZZ3|SYUB_MOUSE	0.33	251.83	40300	40200	1	1	40300	40200	1	1	-	-	31	12	6	TMT6plex	14052	Beta-synuclein OS=Mus musculus GN=Sncb PE=1 SV=1
267	312	Q60864|STIP1_MOUSE	2.38	251.69	56400	48300	1	0.86	56400	48300	1	0.86	-	-	44	26	25	Carbamidomethylation; TMT6plex; Oxidation (M); Deamidation (NQ)	62582	Stress-induced-phosphoprotein 1 OS=Mus musculus GN=Stip1 PE=1 SV=1
313	476	P31938|MP2K1_MOUSE	1.22	251.64	37800	39500	1	1.05	37800	39500	1	1.05	-	-	30	15	11	Carbamidomethylation; TMT6plex; Oxidation (M); Deamidation (NQ)	43474	Dual specificity mitogen-activated protein kinase kinase 1 OS=Mus musculus GN=Map2k1 PE=1 SV=2
383	529	tr|A0A0J9YTY0|A0A0J9YTY0_MOUSE	1.64	251.43	2370	2180	1	0.92	2370	2180	1	0.92	-	-	12	17	4	Carbamidomethylation; TMT6plex	48979	Septin-11 OS=Mus musculus GN=Sept11 PE=1 SV=1
383	530	Q8C1B7|SEP11_MOUSE	1.64	251.43	2370	2180	1	0.92	2370	2180	1	0.92	-	-	11	17	4	Carbamidomethylation; TMT6plex	49695	Septin-11 OS=Mus musculus GN=Sept11 PE=1 SV=4
383	531	tr|A0A0J9YUL3|A0A0J9YUL3_MOUSE	1.64	251.43	2370	2180	1	0.92	2370	2180	1	0.92	-	-	11	17	4	Carbamidomethylation; TMT6plex	49782	Septin 11 isoform CRA_b OS=Mus musculus GN=Sept11 PE=1 SV=1
221	425	P08752|GNAI2_MOUSE	3.82	250.87	5340	4250	1	0.8	5340	4250	1	0.8	-	-	16	17	4	Carbamidomethylation; TMT6plex	40489	Guanine nucleotide-binding protein G(i) subunit alpha-2 OS=Mus musculus GN=Gnai2 PE=1 SV=5
293	1613	P99029|PRDX5_MOUSE	2.09	250.44	77900	87700	1	1.13	77900	87700	1	1.13	-	-	57	11	11	Carbamidomethylation; TMT6plex; Deamidation (NQ)	21897	Peroxiredoxin-5 mitochondrial OS=Mus musculus GN=Prdx5 PE=1 SV=2
311	334	Q3UHL1|CAMKV_MOUSE	3.13	250.3	43900	36300	1	0.83	43900	36300	1	0.83	-	-	43	17	16	Carbamidomethylation; TMT6plex; Deamidation (NQ)	54819	CaM kinase-like vesicle-associated protein OS=Mus musculus GN=Camkv PE=1 SV=2
257	323	tr|A2AUK5|A2AUK5_MOUSE	4.23	250.15	5420	4720	1	0.87	5420	4720	1	0.87	-	-	7	22	5	TMT6plex	98315	Band 4.1-like protein 1 OS=Mus musculus GN=Epb41l1 PE=1 SV=1
369	440	Q61361|PGCB_MOUSE	2.04	249.86	25600	24700	1	0.96	25600	24700	1	0.96	-	-	24	20	19	Carbamidomethylation; TMT6plex	95815	Brevican core protein OS=Mus musculus GN=Bcan PE=1 SV=2
154	872	tr|A2ALV3|A2ALV3_MOUSE	4.27	249.74	62700	62700	1	1	62700	62700	1	1	-	-	28	16	11	Carbamidomethylation; TMT6plex; Oxidation (M)	48296	Endophilin-A1 OS=Mus musculus GN=Sh3gl2 PE=1 SV=1
154	879	Q62420|SH3G2_MOUSE	4.27	249.74	62700	62700	1	1	62700	62700	1	1	-	-	35	16	11	Carbamidomethylation; TMT6plex; Oxidation (M)	39955	Endophilin-A1 OS=Mus musculus GN=Sh3gl2 PE=1 SV=2
190	777	P61264|STX1B_MOUSE	1.59	249.28	97500	88200	1	0.91	97500	88200	1	0.91	-	-	39	13	12	TMT6plex; Deamidation (NQ)	33245	Syntaxin-1B OS=Mus musculus GN=Stx1b PE=1 SV=1
338	583	Q7TMB8|CYFP1_MOUSE	2.48	249.19	1350	1220	1	0.9	1350	1220	1	0.9	-	-	3	23	4	TMT6plex; Deamidation (NQ)	145241	Cytoplasmic FMR1-interacting protein 1 OS=Mus musculus GN=Cyfip1 PE=1 SV=1
268	428	Q9R111|GUAD_MOUSE	2.19	248.99	40900	35900	1	0.88	40900	35900	1	0.88	-	-	48	23	20	Carbamidomethylation; TMT6plex; Deamidation (NQ)	51013	Guanine deaminase OS=Mus musculus GN=Gda PE=1 SV=1
131	786	P62880|GBB2_MOUSE	1.39	248.46	11700	12400	1	1.07	11700	12400	1	1.07	-	-	29	16	6	Carbamidomethylation; TMT6plex; Oxidation (M); Deamidation (NQ)	37331	Guanine nucleotide-binding protein G(I)/G(S)/G(T) subunit beta-2 OS=Mus musculus GN=Gnb2 PE=1 SV=3
468	379	Q8BGQ7|SYAC_MOUSE	1.14	248.46	7140	6550	1	0.92	7140	6550	1	0.92	-	-	17	16	14	Carbamidomethylation; TMT6plex	106908	Alanine--tRNA ligase cytoplasmic OS=Mus musculus GN=Aars PE=1 SV=1
206	690	tr|B1AQW2|B1AQW2_MOUSE	1.83	248.44	532	615.478	1	1.16	532	615.478	1	1.16	-	-	6	16	1	TMT6plex	40892	Microtubule-associated protein OS=Mus musculus GN=Mapt PE=1 SV=1
377	424	P67778|PHB_MOUSE	1.92	248.31	20900	22800	1	1.09	20900	22800	1	1.09	-	-	57	16	13	Carbamidomethylation; TMT6plex	29820	Prohibitin OS=Mus musculus GN=Phb PE=1 SV=1
306	392	tr|Q3TWV4|Q3TWV4_MOUSE	4.26	248.25	44500	37100	1	0.83	44500	37100	1	0.83	-	-	38	18	17	Carbamidomethylation; TMT6plex; Oxidation (M)	49389	AP-2 complex subunit mu OS=Mus musculus GN=Ap2m1 PE=1 SV=1
306	393	P84091|AP2M1_MOUSE	4.26	248.25	44500	37100	1	0.83	44500	37100	1	0.83	-	-	37	18	17	Carbamidomethylation; TMT6plex; Oxidation (M)	49655	AP-2 complex subunit mu OS=Mus musculus GN=Ap2m1 PE=1 SV=1
182	517	P10649|GSTM1_MOUSE	12.92	247.69	39600	64200	1	1.62	39600	64200	1	1.62	-	-	41	21	11	Carbamidomethylation; TMT6plex; Oxidation (M)	25970	Glutathione S-transferase Mu 1 OS=Mus musculus GN=Gstm1 PE=1 SV=2
321	282	tr|A0A0A6YW90|A0A0A6YW90_MOUSE	11.51	247.42	3310	1310	1	0.4	3310	1310	1	0.4	-	-	1	22	1	TMT6plex	87152	Glutamate receptor 2 OS=Mus musculus GN=Gria2 PE=1 SV=1
312	361	Q8K596|NAC2_MOUSE	1.37	247.08	14100	13500	1	0.95	14100	13500	1	0.95	-	-	12	12	9	TMT6plex; Deamidation (NQ)	100711	Sodium/calcium exchanger 2 OS=Mus musculus GN=Slc8a2 PE=1 SV=1
674	290	Q8VDM4|PSMD2_MOUSE	3.2	246.67	6230	6350	1	1.02	6230	6350	1	1.02	-	-	11	10	9	TMT6plex	100203	26S proteasome non-ATPase regulatory subunit 2 OS=Mus musculus GN=Psmd2 PE=1 SV=1
224	465	O88569|ROA2_MOUSE	5.69	246.27	41500	31100	1	0.75	41500	31100	1	0.75	-	-	35	16	12	Carbamidomethylation; TMT6plex; Deamidation (NQ)	37403	Heterogeneous nuclear ribonucleoproteins A2/B1 OS=Mus musculus GN=Hnrnpa2b1 PE=1 SV=2
157	1053	P02089|HBB2_MOUSE	41.25	246.08	11900	17600	1	1.48	11900	17600	1	1.48	-	-	50	17	6	Carbamidomethylation; TMT6plex; Oxidation (M)	15878	Hemoglobin subunit beta-2 OS=Mus musculus GN=Hbb-b2 PE=1 SV=2
205	1681	P70296|PEBP1_MOUSE	3.55	246.05	85800	71700	1	0.84	85800	71700	1	0.84	-	-	45	12	5	Carbamidomethylation; TMT6plex	20830	Phosphatidylethanolamine-binding protein 1 OS=Mus musculus GN=Pebp1 PE=1 SV=3
146	566	Q8VEM8|MPCP_MOUSE	2.08	245.73	4930	4900	1	0.99	4930	4900	1	0.99	-	-	11	21	3	Carbamidomethylation; TMT6plex; Oxidation (M)	39632	Phosphate carrier protein mitochondrial OS=Mus musculus GN=Slc25a3 PE=1 SV=1
472	498	Q99JY9|ARP3_MOUSE	0.93	245.56	15100	14300	1	0.94	15100	14300	1	0.94	-	-	30	12	8	Carbamidomethylation; TMT6plex	47357	Actin-related protein 3 OS=Mus musculus GN=Actr3 PE=1 SV=3
287	474	tr|Q3UGX2|Q3UGX2_MOUSE	1.19	245.51	4140	3860	1	0.93	4140	3860	1	0.93	-	-	5	22	11	TMT6plex	268089	Spectrin beta chain OS=Mus musculus GN=Sptb PE=1 SV=1
353	898	P47754|CAZA2_MOUSE	1.3	245.03	23300	21400	1	0.92	23300	21400	1	0.92	-	-	60	14	11	Carbamidomethylation; TMT6plex; Deamidation (NQ)	32967	F-actin-capping protein subunit alpha-2 OS=Mus musculus GN=Capza2 PE=1 SV=3
278	545	Q60930|VDAC2_MOUSE	4.51	244.02	77300	90800	1	1.17	77300	90800	1	1.17	-	-	57	15	13	Carbamidomethylation; TMT6plex; Deamidation (NQ)	31733	Voltage-dependent anion-selective channel protein 2 OS=Mus musculus GN=Vdac2 PE=1 SV=2
412	278	Q9JLM8|DCLK1_MOUSE	3.42	243.35	9320	7780	1	0.83	9320	7780	1	0.83	-	-	17	17	10	Carbamidomethylation; TMT6plex	84153	Serine/threonine-protein kinase DCLK1 OS=Mus musculus GN=Dclk1 PE=1 SV=1
412	280	tr|A0A0G2JGQ6|A0A0G2JGQ6_MOUSE	3.42	243.35	9320	7780	1	0.83	9320	7780	1	0.83	-	-	17	17	10	Carbamidomethylation; TMT6plex	82105	Serine/threonine-protein kinase DCLK1 OS=Mus musculus GN=Dclk1 PE=1 SV=1
391	527	Q9QYG0|NDRG2_MOUSE	1.63	243.32	25300	23800	1	0.94	25300	23800	1	0.94	-	-	44	13	12	Carbamidomethylation; TMT6plex; Oxidation (M)	40789	Protein NDRG2 OS=Mus musculus GN=Ndrg2 PE=1 SV=1
1010	819	Q99LC5|ETFA_MOUSE	2.18	242.64	12800	13100	1	1.02	12800	13100	1	1.02	-	-	34	11	9	Carbamidomethylation; TMT6plex	35009	Electron transfer flavoprotein subunit alpha mitochondrial OS=Mus musculus GN=Etfa PE=1 SV=2
519	384	Q9QYB5|ADDG_MOUSE	1.38	242.26	5860	5600	1	0.96	5860	5600	1	0.96	-	-	20	15	11	Carbamidomethylation; TMT6plex; Deamidation (NQ)	78777	Gamma-adducin OS=Mus musculus GN=Add3 PE=1 SV=2
461	387	Q8K0T0|RTN1_MOUSE	3.56	242.24	18100	15200	1	0.84	18100	15200	1	0.84	-	-	16	14	9	TMT6plex	83572	Reticulon-1 OS=Mus musculus GN=Rtn1 PE=1 SV=1
319	562	Q9D6M3|GHC1_MOUSE	5.76	242.12	7120	5090	1	0.71	7120	5090	1	0.71	-	-	20	14	3	Carbamidomethylation; TMT6plex	34670	Mitochondrial glutamate carrier 1 OS=Mus musculus GN=Slc25a22 PE=1 SV=1
126	714	tr|Q3TCR7|Q3TCR7_MOUSE	1.46	241.98	291	309.231	1	1.06	291	309.231	1	1.06	-	-	2	24	1	TMT6plex	97987	Dynamin-2 OS=Mus musculus GN=Dnm2 PE=1 SV=1
126	715	tr|G3X9G4|G3X9G4_MOUSE	1.46	241.98	291	309.231	1	1.06	291	309.231	1	1.06	-	-	2	24	1	TMT6plex	98074	Dynamin-2 OS=Mus musculus GN=Dnm2 PE=1 SV=1
709	314	Q8VD37|SGIP1_MOUSE	1.83	241.73	3650	3200	1	0.88	3650	3200	1	0.88	-	-	11	10	7	TMT6plex; Deamidation (NQ)	86063	SH3-containing GRB2-like protein 3-interacting protein 1 OS=Mus musculus GN=Sgip1 PE=1 SV=1
585	532	tr|Q8K1M3|Q8K1M3_MOUSE	2.15	241.39	9190	9020	1	0.98	9190	9020	1	0.98	-	-	21	11	7	TMT6plex	45589	Protein kinase cAMP dependent regulatory type II alpha OS=Mus musculus GN=Prkar2a PE=1 SV=1
117	525	P68510|1433F_MOUSE	2.73	241.3	37100	31500	1	0.85	37100	31500	1	0.85	-	-	37	18	8	Carbamidomethylation; TMT6plex; Oxidation (M); Deamidation (NQ)	28212	14-3-3 protein eta OS=Mus musculus GN=Ywhah PE=1 SV=2
434	593	Q9CWS0|DDAH1_MOUSE	2.37	241.23	23200	22500	1	0.97	23200	22500	1	0.97	-	-	63	17	16	Carbamidomethylation; TMT6plex; Oxidation (M)	31381	N(G) N(G)-dimethylarginine dimethylaminohydrolase 1 OS=Mus musculus GN=Ddah1 PE=1 SV=3
200	496	Q9Z2I9|SUCB1_MOUSE	1.55	241.22	62900	69900	1	1.11	62900	69900	1	1.11	-	-	41	21	18	Carbamidomethylation; TMT6plex; Oxidation (M); Deamidation (NQ)	50114	Succinate--CoA ligase [ADP-forming] subunit beta mitochondrial OS=Mus musculus GN=Sucla2 PE=1 SV=2
217	624	P62631|EF1A2_MOUSE	2.11	241.08	34400	33400	1	0.97	34400	33400	1	0.97	-	-	22	13	7	TMT6plex; Oxidation (M); Deamidation (NQ)	50454	Elongation factor 1-alpha 2 OS=Mus musculus GN=Eef1a2 PE=1 SV=1
142	1231	P18760|COF1_MOUSE	4.53	240.91	212000	170000	1	0.8	212000	170000	1	0.8	-	-	55	16	11	Carbamidomethylation; TMT6plex; Oxidation (M); Deamidation (NQ)	18560	Cofilin-1 OS=Mus musculus GN=Cfl1 PE=1 SV=3
142	1243	tr|F8WGL3|F8WGL3_MOUSE	4.53	240.91	212000	170000	1	0.8	212000	170000	1	0.8	-	-	40	16	11	Carbamidomethylation; TMT6plex; Oxidation (M); Deamidation (NQ)	24576	Cofilin-1 OS=Mus musculus GN=Cfl1 PE=1 SV=1
502	503	Q60625|ICAM5_MOUSE	1.11	240.85	15000	14500	1	0.97	15000	14500	1	0.97	-	-	20	17	16	Carbamidomethylation; TMT6plex	96946	Intercellular adhesion molecule 5 OS=Mus musculus GN=Icam5 PE=1 SV=2
583	437	Q9Z2I0|LETM1_MOUSE	0.66	240.53	7060	6870	1	0.97	7060	6870	1	0.97	-	-	17	16	11	Carbamidomethylation; TMT6plex; Deamidation (NQ)	82989	Mitochondrial proton/calcium exchanger protein OS=Mus musculus GN=Letm1 PE=1 SV=1
213	526	B2RSH2|GNAI1_MOUSE	2.17	240.52	6960	6190	1	0.89	6960	6190	1	0.89	-	-	14	19	5	Carbamidomethylation; TMT6plex; Deamidation (NQ)	40361	Guanine nucleotide-binding protein G(i) subunit alpha-1 OS=Mus musculus GN=Gnai1 PE=1 SV=1
541	553	Q9CZC8|SCRN1_MOUSE	3.18	240.51	20000	18900	1	0.94	20000	18900	1	0.94	-	-	26	12	11	Carbamidomethylation; TMT6plex	46326	Secernin-1 OS=Mus musculus GN=Scrn1 PE=1 SV=1
538	409	tr|E9PZ43|E9PZ43_MOUSE	3.38	240.49	7530	6630	1	0.88	7530	6630	1	0.88	-	-	12	15	9	Carbamidomethylation; TMT6plex	97796	Microtubule-associated protein OS=Mus musculus GN=Map4 PE=1 SV=3
411	451	Q3UNH4|GRIN1_MOUSE	2.99	240.32	14300	11700	1	0.82	14300	11700	1	0.82	-	-	18	16	16	Carbamidomethylation; TMT6plex; Deamidation (NQ)	95496	G protein-regulated inducer of neurite outgrowth 1 OS=Mus musculus GN=Gprin1 PE=1 SV=2
387	485	Q9CZW5|TOM70_MOUSE	1.19	240.18	36000	33200	1	0.92	36000	33200	1	0.92	-	-	36	23	19	Carbamidomethylation; TMT6plex	67590	Mitochondrial import receptor subunit TOM70 OS=Mus musculus GN=Tomm70 PE=1 SV=2
403	579	tr|A0A140LHL5|A0A140LHL5_MOUSE	2.72	239.94	21200	21000	1	0.99	21200	21000	1	0.99	-	-	34	12	10	Carbamidomethylation; TMT6plex	39425	NAD-dependent protein deacetylase sirtuin-2 OS=Mus musculus GN=Sirt2 PE=1 SV=1
470	394	P80315|TCPD_MOUSE	1.66	239.66	13000	12000	1	0.92	13000	12000	1	0.92	-	-	25	15	12	Carbamidomethylation; TMT6plex	58066	T-complex protein 1 subunit delta OS=Mus musculus GN=Cct4 PE=1 SV=3
246	544	tr|E9PZF0|E9PZF0_MOUSE	4.55	239.2	10300	12100	1	1.18	10300	12100	1	1.18	-	-	21	16	5	Carbamidomethylation; TMT6plex	30200	Nucleoside diphosphate kinase OS=Mus musculus GN=Gm20390 PE=3 SV=1
556	406	Q8BMF3|MAON_MOUSE	3.67	238.82	9080	9580	1	1.05	9080	9580	1	1.05	-	-	19	11	10	Carbamidomethylation; TMT6plex	67098	NADP-dependent malic enzyme mitochondrial OS=Mus musculus GN=Me3 PE=1 SV=2
208	447	P63085|MK01_MOUSE	3.03	238.66	32500	27000	1	0.83	32500	27000	1	0.83	-	-	44	20	11	Carbamidomethylation; TMT6plex; Deamidation (NQ)	41276	Mitogen-activated protein kinase 1 OS=Mus musculus GN=Mapk1 PE=1 SV=3
244	500	tr|E9QQ05|E9QQ05_MOUSE	2.85	238.28	55400	46500	1	0.84	55400	46500	1	0.84	-	-	22	18	15	TMT6plex; Oxidation (M); Deamidation (NQ)	88842	Clathrin coat assembly protein AP180 OS=Mus musculus GN=Snap91 PE=1 SV=2
244	501	tr|E9Q9A3|E9Q9A3_MOUSE	2.85	238.28	55400	46500	1	0.84	55400	46500	1	0.84	-	-	23	18	15	TMT6plex; Oxidation (M); Deamidation (NQ)	86056	Clathrin coat assembly protein AP180 OS=Mus musculus GN=Snap91 PE=1 SV=2
244	502	tr|E9QLK9|E9QLK9_MOUSE	2.85	238.28	55400	46500	1	0.84	55400	46500	1	0.84	-	-	21	18	15	TMT6plex; Oxidation (M); Deamidation (NQ)	91864	Clathrin coat assembly protein AP180 OS=Mus musculus GN=Snap91 PE=1 SV=2
244	504	Q61548|AP180_MOUSE	2.85	238.28	55400	46500	1	0.84	55400	46500	1	0.84	-	-	21	18	15	TMT6plex; Oxidation (M); Deamidation (NQ)	91851	Clathrin coat assembly protein AP180 OS=Mus musculus GN=Snap91 PE=1 SV=1
260	488	P14211|CALR_MOUSE	4.29	238.24	92300	73900	1	0.8	92300	73900	1	0.8	-	-	46	18	18	Carbamidomethylation; TMT6plex; Deamidation (NQ)	47995	Calreticulin OS=Mus musculus GN=Calr PE=1 SV=1
416	342	Q61553|FSCN1_MOUSE	2.67	238.11	23200	21500	1	0.92	23200	21500	1	0.92	-	-	28	11	11	Carbamidomethylation; TMT6plex	54508	Fascin OS=Mus musculus GN=Fscn1 PE=1 SV=4
582	468	P42932|TCPQ_MOUSE	1.68	238.08	5750	5200	1	0.9	5750	5200	1	0.9	-	-	20	18	8	Carbamidomethylation; TMT6plex	59556	T-complex protein 1 subunit theta OS=Mus musculus GN=Cct8 PE=1 SV=3
496	405	P06801|MAOX_MOUSE	1.47	237.6	8540	7660	1	0.9	8540	7660	1	0.9	-	-	26	16	14	Carbamidomethylation; TMT6plex	63954	NADP-dependent malic enzyme OS=Mus musculus GN=Me1 PE=1 SV=2
344	435	P68404|KPCB_MOUSE	1.53	237.37	17300	15500	1	0.89	17300	15500	1	0.89	-	-	15	19	9	Carbamidomethylation; TMT6plex; Oxidation (M); Deamidation (NQ)	76751	Protein kinase C beta type OS=Mus musculus GN=Prkcb PE=1 SV=4
757	423	O54774|AP3D1_MOUSE	2.34	237.03	7530	7120	1	0.95	7530	7120	1	0.95	-	-	11	11	11	Carbamidomethylation; TMT6plex	135081	AP-3 complex subunit delta-1 OS=Mus musculus GN=Ap3d1 PE=1 SV=1
80	1434	tr|F6TYB7|F6TYB7_MOUSE	26.64	236.81	12900	28700	1	2.22	12900	28700	1	2.22	-	-	3	17	1	TMT6plex	21188	Myelin basic protein (Fragment) OS=Mus musculus GN=Mbp PE=1 SV=1
47	1396	Q9WV27|AT1A4_MOUSE	0.35	236.67	767	799.942	1	1.04	767	799.942	1	1.04	-	-	1	16	1	TMT6plex	114887	Sodium/potassium-transporting ATPase subunit alpha-4 OS=Mus musculus GN=Atp1a4 PE=1 SV=3
430	395	tr|G5E884|G5E884_MOUSE	2.57	236.56	7180	6800	1	0.95	7180	6800	1	0.95	-	-	19	16	8	Carbamidomethylation; TMT6plex	60608	Serine/threonine-protein kinase PAK 1 OS=Mus musculus GN=Pak1 PE=1 SV=1
643	763	Q8R366|IGSF8_MOUSE	2.1	236.52	13600	13400	1	0.98	13600	13400	1	0.98	-	-	21	10	10	Carbamidomethylation; TMT6plex	65011	Immunoglobulin superfamily member 8 OS=Mus musculus GN=Igsf8 PE=1 SV=2
561	449	Q9QUP5|HPLN1_MOUSE	7.32	236.45	18300	25700	1	1.41	18300	25700	1	1.41	-	-	27	12	10	Carbamidomethylation; TMT6plex; Deamidation (NQ)	40478	Hyaluronan and proteoglycan link protein 1 OS=Mus musculus GN=Hapln1 PE=1 SV=1
53	2180	tr|Q3UKW2|Q3UKW2_MOUSE	4.69	236.24	334000	304000	1	0.91	334000	304000	1	0.91	-	-	28	12	6	TMT6plex; Oxidation (M); Deamidation (NQ)	21560	Calmodulin-1 OS=Mus musculus GN=Calm1 PE=1 SV=1
53	2184	P0DP28|CALM3_MOUSE	4.69	236.24	334000	304000	1	0.91	334000	304000	1	0.91	-	-	37	12	6	TMT6plex; Oxidation (M); Deamidation (NQ)	16838	Calmodulin-3 OS=Mus musculus GN=Calm3 PE=1 SV=1
53	2185	P0DP27|CALM2_MOUSE	4.69	236.24	334000	304000	1	0.91	334000	304000	1	0.91	-	-	37	12	6	TMT6plex; Oxidation (M); Deamidation (NQ)	16838	Calmodulin-2 OS=Mus musculus GN=Calm2 PE=1 SV=1
53	2186	P0DP26|CALM1_MOUSE	4.69	236.24	334000	304000	1	0.91	334000	304000	1	0.91	-	-	37	12	6	TMT6plex; Oxidation (M); Deamidation (NQ)	16838	Calmodulin-1 OS=Mus musculus GN=Calm1 PE=1 SV=1
487	463	Q9CPV4|GLOD4_MOUSE	2.62	236.16	13400	15800	1	1.18	13400	15800	1	1.18	-	-	52	14	14	Carbamidomethylation; TMT6plex	33317	Glyoxalase domain-containing protein 4 OS=Mus musculus GN=Glod4 PE=1 SV=1
290	452	O89053|COR1A_MOUSE	2.52	236.1	33800	28700	1	0.85	33800	28700	1	0.85	-	-	37	16	14	Carbamidomethylation; TMT6plex; Oxidation (M)	50989	Coronin-1A OS=Mus musculus GN=Coro1a PE=1 SV=5
230	930	P60879|SNP25_MOUSE	2.55	235.74	38200	35100	1	0.92	38200	35100	1	0.92	-	-	54	15	14	Carbamidomethylation; TMT6plex; Oxidation (M); Deamidation (NQ)	23315	Synaptosomal-associated protein 25 OS=Mus musculus GN=Snap25 PE=1 SV=1
503	655	Q3UM45|PP1R7_MOUSE	2.54	235.58	14700	14600	1	0.99	14700	14600	1	0.99	-	-	35	12	12	TMT6plex	41292	Protein phosphatase 1 regulatory subunit 7 OS=Mus musculus GN=Ppp1r7 PE=1 SV=2
368	494	Q920I9|WDR7_MOUSE	0.98	235.55	10400	9640	1	0.93	10400	9640	1	0.93	-	-	17	26	20	Carbamidomethylation; TMT6plex	163449	WD repeat-containing protein 7 OS=Mus musculus GN=Wdr7 PE=1 SV=3
247	646	Q923T9|KCC2G_MOUSE	3.78	235.38	5410	4220	1	0.78	5410	4220	1	0.78	-	-	15	16	6	Carbamidomethylation; TMT6plex	59607	Calcium/calmodulin-dependent protein kinase type II subunit gamma OS=Mus musculus GN=Camk2g PE=1 SV=1
180	2518	O55042|SYUA_MOUSE	3.04	235.27	77500	72000	1	0.93	77500	72000	1	0.93	-	-	36	10	5	TMT6plex	14485	Alpha-synuclein OS=Mus musculus GN=Snca PE=1 SV=2
243	1192	Q9DB20|ATPO_MOUSE	8.27	235.27	42500	59500	1	1.4	42500	59500	1	1.4	-	-	28	15	6	Carbamidomethylation; TMT6plex; Oxidation (M); Deamidation (NQ)	23364	ATP synthase subunit O mitochondrial OS=Mus musculus GN=Atp5o PE=1 SV=1
562	374	Q9CZ30|OLA1_MOUSE	3.82	235.23	5380	5970	1	1.11	5380	5970	1	1.11	-	-	23	17	8	TMT6plex	44730	Obg-like ATPase 1 OS=Mus musculus GN=Ola1 PE=1 SV=1
613	381	Q91XM9|DLG2_MOUSE	2.56	235.22	10900	9310	1	0.85	10900	9310	1	0.85	-	-	15	15	10	TMT6plex	94880	Disks large homolog 2 OS=Mus musculus GN=Dlg2 PE=1 SV=2
528	486	P26039|TLN1_MOUSE	2.87	235.16	1560	1400	1	0.9	1560	1400	1	0.9	-	-	1	13	3	TMT6plex	269819	Talin-1 OS=Mus musculus GN=Tln1 PE=1 SV=2
351	411	P80318|TCPG_MOUSE	0.73	235.13	25800	25200	1	0.98	25800	25200	1	0.98	-	-	41	25	20	Carbamidomethylation; TMT6plex; Deamidation (NQ)	60630	T-complex protein 1 subunit gamma OS=Mus musculus GN=Cct3 PE=1 SV=1
460	630	P80313|TCPH_MOUSE	1.11	234.99	8380	7910	1	0.94	8380	7910	1	0.94	-	-	24	19	13	Carbamidomethylation; TMT6plex; Deamidation (NQ)	59652	T-complex protein 1 subunit eta OS=Mus musculus GN=Cct7 PE=1 SV=1
537	657	tr|A0A1D5RLK2|A0A1D5RLK2_MOUSE	1.23	234.83	742	710.993	1	0.96	742	710.993	1	0.96	-	-	2	18	2	TMT6plex; Deamidation (NQ)	114536	PH and SEC7 domain-containing protein 3 OS=Mus musculus GN=Psd3 PE=1 SV=1
537	658	tr|F6Z9E6|F6Z9E6_MOUSE	1.23	234.83	742	710.993	1	0.96	742	710.993	1	0.96	-	-	2	18	2	TMT6plex; Deamidation (NQ)	111296	PH and SEC7 domain-containing protein 3 OS=Mus musculus GN=Psd3 PE=1 SV=2
537	666	Q2PFD7|PSD3_MOUSE	1.23	234.83	742	710.993	1	0.96	742	710.993	1	0.96	-	-	2	18	2	TMT6plex; Deamidation (NQ)	114722	PH and SEC7 domain-containing protein 3 OS=Mus musculus GN=Psd3 PE=1 SV=2
537	680	tr|A0A1D5RMH7|A0A1D5RMH7_MOUSE	1.23	234.83	742	710.993	1	0.96	742	710.993	1	0.96	-	-	2	18	2	TMT6plex; Deamidation (NQ)	142027	PH and SEC7 domain-containing protein 3 OS=Mus musculus GN=Psd3 PE=1 SV=1
539	416	Q9D394|RUFY3_MOUSE	1.22	234.72	1040	1050	1	1	1040	1050	1	1	-	-	3	17	1	Carbamidomethylation; TMT6plex	53007	Protein RUFY3 OS=Mus musculus GN=Rufy3 PE=1 SV=1
549	396	Q61753|SERA_MOUSE	0.11	234.28	17000	17000	1	1.01	17000	17000	1	1.01	-	-	29	13	12	Carbamidomethylation; TMT6plex; Deamidation (NQ)	56586	D-3-phosphoglycerate dehydrogenase OS=Mus musculus GN=Phgdh PE=1 SV=3
342	1176	Q99LX0|PARK7_MOUSE	2.72	234.24	40000	39700	1	0.99	40000	39700	1	0.99	-	-	69	11	11	Carbamidomethylation; TMT6plex; Oxidation (M); Deamidation (NQ)	20021	Protein DJ-1 OS=Mus musculus GN=Park7 PE=1 SV=1
489	637	Q61990|PCBP2_MOUSE	1.58	233.98	5120	4560	1	0.89	5120	4560	1	0.89	-	-	14	9	4	Carbamidomethylation; TMT6plex	38222	Poly(rC)-binding protein 2 OS=Mus musculus GN=Pcbp2 PE=1 SV=1
426	522	O70318|E41L2_MOUSE	0.68	233.81	6920	6820	1	0.99	6920	6820	1	0.99	-	-	11	15	9	Carbamidomethylation; TMT6plex	109940	Band 4.1-like protein 2 OS=Mus musculus GN=Epb41l2 PE=1 SV=2
520	768	Q9Z218|DPP6_MOUSE	2.33	233.78	14500	12800	1	0.88	14500	12800	1	0.88	-	-	16	18	12	TMT6plex; Oxidation (M)	91260	Dipeptidyl aminopeptidase-like protein 6 OS=Mus musculus GN=Dpp6 PE=1 SV=1
1044	493	Q9CWJ9|PUR9_MOUSE	1.12	233.73	2580	2480	1	0.96	2580	2480	1	0.96	-	-	8	5	5	Carbamidomethylation; TMT6plex	64217	Bifunctional purine biosynthesis protein PURH OS=Mus musculus GN=Atic PE=1 SV=2
642	599	Q8CGK3|LONM_MOUSE	1.11	233.72	4290	3950	1	0.92	4290	3950	1	0.92	-	-	9	14	8	Carbamidomethylation; TMT6plex; Deamidation (NQ)	105843	Lon protease homolog mitochondrial OS=Mus musculus GN=Lonp1 PE=1 SV=2
568	1054	P49312|ROA1_MOUSE	5.52	233.61	9910	7130	1	0.72	9910	7130	1	0.72	-	-	26	13	8	TMT6plex; Deamidation (NQ)	34196	Heterogeneous nuclear ribonucleoprotein A1 OS=Mus musculus GN=Hnrnpa1 PE=1 SV=2
568	1060	tr|Q5EBP8|Q5EBP8_MOUSE	5.52	233.61	9910	7130	1	0.72	9910	7130	1	0.72	-	-	23	13	8	TMT6plex; Deamidation (NQ)	38834	Heterogeneous nuclear ribonucleoprotein A1 OS=Mus musculus GN=Hnrnpa1 PE=1 SV=1
524	845	P62141|PP1B_MOUSE	0.48	233.49	1190	1210	1	1.02	1190	1210	1	1.02	-	-	7	13	2	Carbamidomethylation; TMT6plex	37187	Serine/threonine-protein phosphatase PP1-beta catalytic subunit OS=Mus musculus GN=Ppp1cb PE=1 SV=3
521	397	P29341|PABP1_MOUSE	0.94	233.29	4830	4500	1	0.93	4830	4500	1	0.93	-	-	16	19	9	TMT6plex; Oxidation (M)	70671	Polyadenylate-binding protein 1 OS=Mus musculus GN=Pabpc1 PE=1 SV=2
665	490	Q9WV34|MPP2_MOUSE	2.77	233.15	8450	7870	1	0.93	8450	7870	1	0.93	-	-	26	14	12	Carbamidomethylation; TMT6plex	61555	MAGUK p55 subfamily member 2 OS=Mus musculus GN=Mpp2 PE=1 SV=1
476	542	Q8VEK3|HNRPU_MOUSE	3.09	233.1	19800	16200	1	0.82	19800	16200	1	0.82	-	-	17	15	14	Carbamidomethylation; TMT6plex; Oxidation (M); Deamidation (NQ)	87918	Heterogeneous nuclear ribonucleoprotein U OS=Mus musculus GN=Hnrnpu PE=1 SV=1
498	623	P21279|GNAQ_MOUSE	3.78	232.93	5590	5050	1	0.9	5590	5050	1	0.9	-	-	18	12	5	Carbamidomethylation; TMT6plex	42158	Guanine nucleotide-binding protein G(q) subunit alpha OS=Mus musculus GN=Gnaq PE=1 SV=4
350	417	Q9QYB8|ADDB_MOUSE	1.87	232.91	14400	13200	1	0.92	14400	13200	1	0.92	-	-	14	14	9	TMT6plex	80642	Beta-adducin OS=Mus musculus GN=Add2 PE=1 SV=4
436	453	Q9D0F9|PGM1_MOUSE	1.22	232.83	1420	1190	1	0.84	1420	1190	1	0.84	-	-	3	23	1	TMT6plex	61418	Phosphoglucomutase-1 OS=Mus musculus GN=Pgm1 PE=1 SV=4
304	704	P70404|IDHG1_MOUSE	0.69	232.65	27800	28800	1	1.03	27800	28800	1	1.03	-	-	39	12	12	Carbamidomethylation; TMT6plex	42785	Isocitrate dehydrogenase [NAD] subunit gamma 1 mitochondrial OS=Mus musculus GN=Idh3g PE=1 SV=1
578	561	Q9EPN1|NBEA_MOUSE	2.53	232.58	4110	3530	1	0.86	4110	3530	1	0.86	-	-	3	11	8	Carbamidomethylation; TMT6plex	326742	Neurobeachin OS=Mus musculus GN=Nbea PE=1 SV=1
697	700	Q9D819|IPYR_MOUSE	2.89	232.21	20600	18600	1	0.9	20600	18600	1	0.9	-	-	58	14	13	Carbamidomethylation; TMT6plex	32667	Inorganic pyrophosphatase OS=Mus musculus GN=Ppa1 PE=1 SV=1
404	755	P51863|VA0D1_MOUSE	2.78	232.08	37800	33000	1	0.87	37800	33000	1	0.87	-	-	41	12	12	Carbamidomethylation; TMT6plex	40301	V-type proton ATPase subunit d 1 OS=Mus musculus GN=Atp6v0d1 PE=1 SV=2
485	539	Q99KJ8|DCTN2_MOUSE	1.97	232.03	19700	18400	1	0.93	19700	18400	1	0.93	-	-	37	15	13	TMT6plex	44117	Dynactin subunit 2 OS=Mus musculus GN=Dctn2 PE=1 SV=3
467	644	Q99LC3|NDUAA_MOUSE	4.18	231.93	16400	19300	1	1.18	16400	19300	1	1.18	-	-	39	15	12	Carbamidomethylation; TMT6plex; Deamidation (NQ)	40603	NADH dehydrogenase [ubiquinone] 1 alpha subcomplex subunit 10 mitochondrial OS=Mus musculus GN=Ndufa10 PE=1 SV=1
801	585	Q9DC69|NDUA9_MOUSE	4.03	231.85	6910	7220	1	1.04	6910	7220	1	1.04	-	-	23	10	8	TMT6plex	42525	NADH dehydrogenase [ubiquinone] 1 alpha subcomplex subunit 9 mitochondrial OS=Mus musculus GN=Ndufa9 PE=1 SV=2
801	587	tr|A0A0R3P9C8|A0A0R3P9C8_MOUSE	4.03	231.85	6910	7220	1	1.04	6910	7220	1	1.04	-	-	23	10	8	TMT6plex	42122	NADH dehydrogenase [ubiquinone] 1 alpha subcomplex subunit 9 mitochondrial OS=Mus musculus GN=Ndufa9 PE=1 SV=1
161	688	tr|E9PZ00|E9PZ00_MOUSE	7.96	231.76	109000	134000	1	1.23	109000	134000	1	1.23	-	-	26	19	19	Carbamidomethylation; TMT6plex; Oxidation (M)	60672	Prosaposin OS=Mus musculus GN=Psap PE=1 SV=1
161	689	tr|Q8BFQ1|Q8BFQ1_MOUSE	7.96	231.76	109000	134000	1	1.23	109000	134000	1	1.23	-	-	26	19	19	Carbamidomethylation; TMT6plex; Oxidation (M)	61051	Prosaposin OS=Mus musculus GN=Psap PE=1 SV=1
161	692	Q61207|SAP_MOUSE	7.96	231.76	109000	134000	1	1.23	109000	134000	1	1.23	-	-	26	19	19	Carbamidomethylation; TMT6plex; Oxidation (M)	61422	Prosaposin OS=Mus musculus GN=Psap PE=1 SV=2
161	693	tr|J3QPG5|J3QPG5_MOUSE	7.96	231.76	109000	134000	1	1.23	109000	134000	1	1.23	-	-	26	19	19	Carbamidomethylation; TMT6plex; Oxidation (M)	61363	Prosaposin OS=Mus musculus GN=Psap PE=1 SV=1
161	694	tr|K3W4L3|K3W4L3_MOUSE	7.96	231.76	109000	134000	1	1.23	109000	134000	1	1.23	-	-	26	19	19	Carbamidomethylation; TMT6plex; Oxidation (M)	61292	Prosaposin OS=Mus musculus GN=Psap PE=1 SV=1
336	550	Q9CWZ7|SNAG_MOUSE	1.69	231.75	36500	32600	1	0.89	36500	32600	1	0.89	-	-	51	20	17	Carbamidomethylation; TMT6plex; Oxidation (M); Deamidation (NQ)	34732	Gamma-soluble NSF attachment protein OS=Mus musculus GN=Napg PE=1 SV=1
455	564	Q9Z0P4|PALM_MOUSE	3.66	231.72	11200	9160	1	0.82	11200	9160	1	0.82	-	-	18	11	5	TMT6plex	41614	Paralemmin-1 OS=Mus musculus GN=Palm PE=1 SV=1
504	1093	P42669|PURA_MOUSE	2.18	231.2	24900	21500	1	0.86	24900	21500	1	0.86	-	-	36	16	13	Carbamidomethylation; TMT6plex; Oxidation (M); Deamidation (NQ)	34884	Transcriptional activator protein Pur-alpha OS=Mus musculus GN=Pura PE=1 SV=1
305	412	P20152|VIME_MOUSE	2.75	231.16	9580	9170	1	0.96	9580	9170	1	0.96	-	-	21	16	9	TMT6plex	53688	Vimentin OS=Mus musculus GN=Vim PE=1 SV=3
302	1633	Q7TQD2|TPPP_MOUSE	1.3	231.11	56300	56700	1	1.01	56300	56700	1	1.01	-	-	28	6	6	Carbamidomethylation; TMT6plex	23575	Tubulin polymerization-promoting protein OS=Mus musculus GN=Tppp PE=1 SV=1
529	1007	P63087|PP1G_MOUSE	1.88	231.07	405	337.886	1	0.83	405	337.886	1	0.83	-	-	3	13	1	TMT6plex	36984	Serine/threonine-protein phosphatase PP1-gamma catalytic subunit OS=Mus musculus GN=Ppp1cc PE=1 SV=1
375	1842	tr|Q91YH6|Q91YH6_MOUSE	2.97	230.97	475	327.14	1	0.69	475	327.14	1	0.69	-	-	2	8	1	TMT6plex	56791	ATPase H+ transporting lysosomal V1 subunit B1 OS=Mus musculus GN=Atp6v1b1 PE=1 SV=1
335	578	tr|E9PV14|E9PV14_MOUSE	2.46	230.9	317	262.071	1	0.83	317	262.071	1	0.83	-	-	2	18	1	TMT6plex	117172	Band 4.1-like protein 1 (Fragment) OS=Mus musculus GN=Epb41l1 PE=1 SV=1
446	510	tr|Q4VA93|Q4VA93_MOUSE	1.5	230.77	913	1010	1	1.11	913	1010	1	1.11	-	-	2	17	1	TMT6plex	76824	Protein kinase C OS=Mus musculus GN=Prkca PE=1 SV=1
438	441	P28738|KIF5C_MOUSE	4.56	230.66	3280	2560	1	0.78	3280	2560	1	0.78	-	-	6	16	6	TMT6plex	109275	Kinesin heavy chain isoform 5C OS=Mus musculus GN=Kif5c PE=1 SV=3
295	640	P61161|ARP2_MOUSE	1.94	230.39	25800	23300	1	0.9	25800	23300	1	0.9	-	-	35	17	13	Carbamidomethylation; TMT6plex; Oxidation (M); Deamidation (NQ)	44761	Actin-related protein 2 OS=Mus musculus GN=Actr2 PE=1 SV=1
647	511	Q91ZA3|PCCA_MOUSE	0.99	229.65	6590	6230	1	0.94	6590	6230	1	0.94	-	-	17	14	11	TMT6plex; Deamidation (NQ)	79922	Propionyl-CoA carboxylase alpha chain mitochondrial OS=Mus musculus GN=Pcca PE=1 SV=2
570	537	Q61838|PZP_MOUSE	6.89	229.6	5490	6980	1	1.27	5490	6980	1	1.27	-	-	11	19	12	Carbamidomethylation; TMT6plex; Deamidation (NQ)	165852	Pregnancy zone protein OS=Mus musculus GN=Pzp PE=1 SV=3
933	703	Q64727|VINC_MOUSE	4.55	229.29	5490	5320	1	0.97	5490	5320	1	0.97	-	-	8	8	8	TMT6plex	116717	Vinculin OS=Mus musculus GN=Vcl PE=1 SV=4
774	497	O88685|PRS6A_MOUSE	1.55	229.19	6910	6670	1	0.97	6910	6670	1	0.97	-	-	18	9	7	TMT6plex	49549	26S proteasome regulatory subunit 6A OS=Mus musculus GN=Psmc3 PE=1 SV=2
253	926	P00920|CAH2_MOUSE	4.57	228.56	79800	98400	1	1.23	79800	98400	1	1.23	-	-	65	13	13	TMT6plex; Oxidation (M); Deamidation (NQ)	29033	Carbonic anhydrase 2 OS=Mus musculus GN=Ca2 PE=1 SV=4
846	559	tr|Q6PGJ3|Q6PGJ3_MOUSE	6.5	228.56	672	651.296	1	0.97	672	651.296	1	0.97	-	-	4	14	2	TMT6plex	140916	L1 cell adhesion molecule OS=Mus musculus GN=L1cam PE=1 SV=1
846	560	tr|A2AFG8|A2AFG8_MOUSE	6.5	228.56	672	651.296	1	0.97	672	651.296	1	0.97	-	-	4	14	2	TMT6plex	140431	Neural cell adhesion molecule L1 OS=Mus musculus GN=L1cam PE=1 SV=1
433	546	Q9JII6|AK1A1_MOUSE	3.73	228.37	12100	14300	1	1.18	12100	14300	1	1.18	-	-	38	15	12	Carbamidomethylation; TMT6plex	36587	Alcohol dehydrogenase [NADP(+)] OS=Mus musculus GN=Akr1a1 PE=1 SV=3
184	1178	P63011|RAB3A_MOUSE	1.03	228.26	67900	65900	1	0.97	67900	65900	1	0.97	-	-	24	11	4	Carbamidomethylation; TMT6plex; Oxidation (M); Deamidation (NQ)	24970	Ras-related protein Rab-3A OS=Mus musculus GN=Rab3a PE=1 SV=1
1164	478	Q91VI7|RINI_MOUSE	3.71	228.13	5020	4580	1	0.91	5020	4580	1	0.91	-	-	26	9	9	Carbamidomethylation; TMT6plex	49817	Ribonuclease inhibitor OS=Mus musculus GN=Rnh1 PE=1 SV=1
1164	479	tr|A0A1B0GSG5|A0A1B0GSG5_MOUSE	3.71	228.13	5020	4580	1	0.91	5020	4580	1	0.91	-	-	24	9	9	Carbamidomethylation; TMT6plex	53926	Ribonuclease inhibitor OS=Mus musculus GN=Rnh1 PE=1 SV=1
348	662	Q9JKK7|TMOD2_MOUSE	3.29	227.93	10500	10200	1	0.97	10500	10200	1	0.97	-	-	28	14	8	TMT6plex; Deamidation (NQ)	39511	Tropomodulin-2 OS=Mus musculus GN=Tmod2 PE=1 SV=2
641	419	Q6R891|NEB2_MOUSE	3.34	227.76	4210	3350	1	0.8	4210	3350	1	0.8	-	-	11	8	6	TMT6plex	89520	Neurabin-2 OS=Mus musculus GN=Ppp1r9b PE=1 SV=1
589	418	Q9CPY7|AMPL_MOUSE	1.27	227.55	5190	5110	1	0.99	5190	5110	1	0.99	-	-	25	13	10	Carbamidomethylation; TMT6plex	56141	Cytosol aminopeptidase OS=Mus musculus GN=Lap3 PE=1 SV=3
1076	536	Q6P9K8|CSKI1_MOUSE	1.81	227.34	4890	4290	1	0.88	4890	4290	1	0.88	-	-	7	10	9	Carbamidomethylation; TMT6plex; Deamidation (NQ)	150495	Caskin-1 OS=Mus musculus GN=Caskin1 PE=1 SV=2
629	952	Q8R5H6|WASF1_MOUSE	0.87	227.24	6680	6520	1	0.98	6680	6520	1	0.98	-	-	16	11	7	TMT6plex	61509	Wiskott-Aldrich syndrome protein family member 1 OS=Mus musculus GN=Wasf1 PE=1 SV=2
505	818	Q9R1Q8|TAGL3_MOUSE	3.84	227.01	21100	17500	1	0.83	21100	17500	1	0.83	-	-	50	11	9	Carbamidomethylation; TMT6plex; Oxidation (M)	22471	Transgelin-3 OS=Mus musculus GN=Tagln3 PE=1 SV=1
299	1005	P15532|NDKA_MOUSE	2.77	226.8	4100	4600	1	1.12	4100	4600	1	1.12	-	-	22	13	3	Carbamidomethylation; TMT6plex	17208	Nucleoside diphosphate kinase A OS=Mus musculus GN=Nme1 PE=1 SV=1
611	1213	Q9R0Y5|KAD1_MOUSE	2.9	226.77	10700	9360	1	0.87	10700	9360	1	0.87	-	-	52	11	8	TMT6plex; Deamidation (NQ)	21540	Adenylate kinase isoenzyme 1 OS=Mus musculus GN=Ak1 PE=1 SV=1
573	1269	O35526|STX1A_MOUSE	6.44	226.67	12400	9810	1	0.79	12400	9810	1	0.79	-	-	25	8	6	TMT6plex	33054	Syntaxin-1A OS=Mus musculus GN=Stx1a PE=1 SV=3
329	741	tr|A2AMW0|A2AMW0_MOUSE	2.02	226.57	8750	7860	1	0.9	8750	7860	1	0.9	-	-	7	15	3	TMT6plex; Deamidation (NQ)	29295	Capping protein (Actin filament) muscle Z-line beta isoform CRA_a OS=Mus musculus GN=Capzb PE=1 SV=1
907	455	D3YVF0|AKAP5_MOUSE	5.68	226.27	3210	2610	1	0.81	3210	2610	1	0.81	-	-	11	6	6	Carbamidomethylation; TMT6plex	79397	A-kinase anchor protein 5 OS=Mus musculus GN=Akap5 PE=1 SV=2
907	456	tr|H3BIV5|H3BIV5_MOUSE	5.68	226.27	3210	2610	1	0.81	3210	2610	1	0.81	-	-	11	6	6	Carbamidomethylation; TMT6plex	80203	A-kinase anchor protein 5 OS=Mus musculus GN=Akap5 PE=1 SV=1
731	521	P47708|RP3A_MOUSE	2.62	225.89	6540	5420	1	0.83	6540	5420	1	0.83	-	-	12	8	7	Carbamidomethylation; TMT6plex; Oxidation (M); Deamidation (NQ)	75489	Rabphilin-3A OS=Mus musculus GN=Rph3a PE=1 SV=2
414	621	Q9CQA3|SDHB_MOUSE	2.94	225.88	29500	31700	1	1.07	29500	31700	1	1.07	-	-	33	17	12	TMT6plex; Oxidation (M)	31814	Succinate dehydrogenase [ubiquinone] iron-sulfur subunit mitochondrial OS=Mus musculus GN=Sdhb PE=1 SV=1
307	1072	tr|G3X9L6|G3X9L6_MOUSE	0.88	225.78	58900	61400	1	1.04	58900	61400	1	1.04	-	-	73	13	11	Carbamidomethylation; TMT6plex; Oxidation (M); Deamidation (NQ)	18621	ATP synthase subunit d mitochondrial OS=Mus musculus GN=Gm10250 PE=3 SV=1
307	1073	Q9DCX2|ATP5H_MOUSE	0.88	225.78	58900	61400	1	1.04	58900	61400	1	1.04	-	-	73	13	11	Carbamidomethylation; TMT6plex; Oxidation (M); Deamidation (NQ)	18749	ATP synthase subunit d mitochondrial OS=Mus musculus GN=Atp5h PE=1 SV=3
242	1384	P84078|ARF1_MOUSE	2.21	225.67	684	559.959	1	0.82	684	559.959	1	0.82	-	-	6	12	1	TMT6plex; Oxidation (M); Acetylation (Protein N-term)	20697	ADP-ribosylation factor 1 OS=Mus musculus GN=Arf1 PE=1 SV=2
261	1773	P19157|GSTP1_MOUSE	4.85	225.37	48300	62300	1	1.29	48300	62300	1	1.29	-	-	61	11	11	Carbamidomethylation; TMT6plex; Oxidation (M); Deamidation (NQ)	23609	Glutathione S-transferase P 1 OS=Mus musculus GN=Gstp1 PE=1 SV=2
396	602	Q9WVK4|EHD1_MOUSE	0.42	225.32	5410	5270	1	0.97	5410	5270	1	0.97	-	-	9	13	6	TMT6plex	60603	EH domain-containing protein 1 OS=Mus musculus GN=Ehd1 PE=1 SV=1
919	582	Q91VR5|DDX1_MOUSE	2.13	225.24	7740	6680	1	0.86	7740	6680	1	0.86	-	-	18	12	11	Carbamidomethylation; TMT6plex	82500	ATP-dependent RNA helicase DDX1 OS=Mus musculus GN=Ddx1 PE=1 SV=1
545	554	tr|E9Q2A6|E9Q2A6_MOUSE	2.3	225.2	9410	8490	1	0.9	9410	8490	1	0.9	-	-	19	21	17	Carbamidomethylation; TMT6plex; Deamidation (NQ)	111103	Protein-tyrosine kinase 2-beta OS=Mus musculus GN=Ptk2b PE=1 SV=1
545	555	Q9QVP9|FAK2_MOUSE	2.3	225.2	9410	8490	1	0.9	9410	8490	1	0.9	-	-	18	21	17	Carbamidomethylation; TMT6plex; Deamidation (NQ)	115794	Protein-tyrosine kinase 2-beta OS=Mus musculus GN=Ptk2b PE=1 SV=2
618	590	tr|G5E924|G5E924_MOUSE	2.31	224.85	13200	11300	1	0.86	13200	11300	1	0.86	-	-	20	12	10	Carbamidomethylation; TMT6plex; Oxidation (M); Deamidation (NQ)	66941	Heterogeneous nuclear ribonucleoprotein L (Fragment) OS=Mus musculus GN=Hnrnpl PE=1 SV=1
624	1063	P62137|PP1A_MOUSE	2.01	224.83	1680	1500	1	0.89	1680	1500	1	0.89	-	-	6	12	2	TMT6plex	37540	Serine/threonine-protein phosphatase PP1-alpha catalytic subunit OS=Mus musculus GN=Ppp1ca PE=1 SV=1
511	482	P54071|IDHP_MOUSE	2.73	224.78	14200	16900	1	1.19	14200	16900	1	1.19	-	-	30	16	13	Carbamidomethylation; TMT6plex	50906	Isocitrate dehydrogenase [NADP] mitochondrial OS=Mus musculus GN=Idh2 PE=1 SV=3
376	1172	Q9WUM5|SUCA_MOUSE	0.61	224.74	29200	30400	1	1.04	29200	30400	1	1.04	-	-	37	11	10	Carbamidomethylation; TMT6plex; Oxidation (M)	36155	Succinate--CoA ligase [ADP/GDP-forming] subunit alpha mitochondrial OS=Mus musculus GN=Suclg1 PE=1 SV=4
586	1080	tr|Q6P6I8|Q6P6I8_MOUSE	0.86	224.55	1010	1000	1	0.99	1010	1000	1	0.99	-	-	5	11	1	TMT6plex	55986	Signal-regulatory protein alpha OS=Mus musculus GN=Sirpa PE=1 SV=1
660	793	P31324|KAP3_MOUSE	6.26	224.36	11600	9300	1	0.8	11600	9300	1	0.8	-	-	21	11	7	Carbamidomethylation; TMT6plex; Oxidation (M); Deamidation (NQ)	46167	cAMP-dependent protein kinase type II-beta regulatory subunit OS=Mus musculus GN=Prkar2b PE=1 SV=3
379	720	tr|F6U7V1|F6U7V1_MOUSE	1.48	224.3	2130	1900	1	0.9	2130	1900	1	0.9	-	-	1	16	6	TMT6plex	564742	Ryanodine receptor 2 OS=Mus musculus GN=Ryr2 PE=1 SV=1
379	721	E9Q401|RYR2_MOUSE	1.48	224.3	2130	1900	1	0.9	2130	1900	1	0.9	-	-	1	16	6	TMT6plex	564827	Ryanodine receptor 2 OS=Mus musculus GN=Ryr2 PE=1 SV=1
233	618	P08113|ENPL_MOUSE	0.78	224.13	36400	35400	1	0.97	36400	35400	1	0.97	-	-	25	25	22	TMT6plex; Deamidation (NQ)	92476	Endoplasmin OS=Mus musculus GN=Hsp90b1 PE=1 SV=2
309	1062	Q9JIS5|SV2A_MOUSE	2.09	223.98	39500	35200	1	0.89	39500	35200	1	0.89	-	-	12	13	11	TMT6plex; Oxidation (M); Deamidation (NQ)	82647	Synaptic vesicle glycoprotein 2A OS=Mus musculus GN=Sv2a PE=1 SV=1
649	533	Q0VE82|CPNE7_MOUSE	1.03	223.78	8280	8120	1	0.98	8280	8120	1	0.98	-	-	23	13	11	Carbamidomethylation; TMT6plex; Deamidation (NQ)	61891	Copine-7 OS=Mus musculus GN=Cpne7 PE=1 SV=1
661	628	tr|B1AZ46|B1AZ46_MOUSE	1.97	223.72	9440	8600	1	0.91	9440	8600	1	0.91	-	-	22	12	11	Carbamidomethylation; TMT6plex	57682	Brain-specific angiogenesis inhibitor 1-associated protein 2 OS=Mus musculus GN=Baiap2 PE=1 SV=1
661	629	Q8BKX1|BAIP2_MOUSE	1.97	223.72	9440	8600	1	0.91	9440	8600	1	0.91	-	-	22	12	11	Carbamidomethylation; TMT6plex	59237	Brain-specific angiogenesis inhibitor 1-associated protein 2 OS=Mus musculus GN=Baiap2 PE=1 SV=2
844	534	tr|E9QKH8|E9QKH8_MOUSE	6.22	223.61	912	996.943	1	1.09	912	996.943	1	1.09	-	-	3	7	3	Carbamidomethylation; TMT6plex; Deamidation (NQ)	134942	Catenin delta-2 OS=Mus musculus GN=Ctnnd2 PE=1 SV=1
844	535	O35927|CTND2_MOUSE	6.22	223.61	912	996.943	1	1.09	912	996.943	1	1.09	-	-	3	7	3	Carbamidomethylation; TMT6plex; Deamidation (NQ)	134999	Catenin delta-2 OS=Mus musculus GN=Ctnnd2 PE=1 SV=1
475	653	P20444|KPCA_MOUSE	1.09	223.55	241	266.846	1	1.11	241	266.846	1	1.11	-	-	2	16	1	TMT6plex; Deamidation (NQ)	76852	Protein kinase C alpha type OS=Mus musculus GN=Prkca PE=1 SV=3
406	574	tr|Q7TNB5|Q7TNB5_MOUSE	1.99	223.32	1330	1020	1	0.77	1330	1020	1	0.77	-	-	1	19	1	TMT6plex	101593	Glutamate receptor 1 OS=Mus musculus GN=Gria1 PE=1 SV=1
723	1708	Q9DCT2|NDUS3_MOUSE	0.63	223.27	6010	6260	1	1.04	6010	6260	1	1.04	-	-	30	8	7	TMT6plex	30149	NADH dehydrogenase [ubiquinone] iron-sulfur protein 3 mitochondrial OS=Mus musculus GN=Ndufs3 PE=1 SV=2
682	814	Q8R5C5|ACTY_MOUSE	2.05	223.11	1710	1870	1	1.1	1710	1870	1	1.1	-	-	13	12	3	TMT6plex	42281	Beta-centractin OS=Mus musculus GN=Actr1b PE=1 SV=1
479	966	P53994|RAB2A_MOUSE	2.34	223.01	7110	6320	1	0.89	7110	6320	1	0.89	-	-	24	14	4	TMT6plex; Deamidation (NQ)	23548	Ras-related protein Rab-2A OS=Mus musculus GN=Rab2a PE=1 SV=1
741	743	tr|B1AWN6|B1AWN6_MOUSE	1.86	222.97	5360	4620	1	0.86	5360	4620	1	0.86	-	-	4	16	6	TMT6plex; Deamidation (NQ)	227943	Sodium channel protein OS=Mus musculus GN=Scn2a PE=1 SV=1
741	744	tr|A0A0J9YTW6|A0A0J9YTW6_MOUSE	1.86	222.97	5360	4620	1	0.86	5360	4620	1	0.86	-	-	4	16	6	TMT6plex; Deamidation (NQ)	227944	Sodium channel protein OS=Mus musculus GN=Scn2a PE=1 SV=1
327	538	Q9CVB6|ARPC2_MOUSE	2.2	222.57	41400	38200	1	0.92	41400	38200	1	0.92	-	-	54	19	17	Carbamidomethylation; TMT6plex; Oxidation (M); Deamidation (NQ)	34357	Actin-related protein 2/3 complex subunit 2 OS=Mus musculus GN=Arpc2 PE=1 SV=3
484	726	P10852|4F2_MOUSE	1.84	222.42	30500	27700	1	0.91	30500	27700	1	0.91	-	-	24	13	12	TMT6plex	58337	4F2 cell-surface antigen heavy chain OS=Mus musculus GN=Slc3a2 PE=1 SV=1
462	868	P60335|PCBP1_MOUSE	0.33	222.32	8880	8780	1	0.99	8880	8780	1	0.99	-	-	22	10	6	Carbamidomethylation; TMT6plex	37498	Poly(rC)-binding protein 1 OS=Mus musculus GN=Pcbp1 PE=1 SV=1
281	791	P84075|HPCA_MOUSE	4.85	222.29	16700	15900	1	0.95	16700	15900	1	0.95	-	-	26	14	5	Carbamidomethylation; TMT6plex	22427	Neuron-specific calcium-binding protein hippocalcin OS=Mus musculus GN=Hpca PE=1 SV=2
499	783	tr|F8WIR1|F8WIR1_MOUSE	1.82	222.29	20600	22700	1	1.1	20600	22700	1	1.1	-	-	34	14	14	Carbamidomethylation; TMT6plex; Oxidation (M); Deamidation (NQ)	44215	Cathepsin D OS=Mus musculus GN=Ctsd PE=1 SV=2
499	784	P18242|CATD_MOUSE	1.82	222.29	20600	22700	1	1.1	20600	22700	1	1.1	-	-	33	14	14	Carbamidomethylation; TMT6plex; Oxidation (M); Deamidation (NQ)	44954	Cathepsin D OS=Mus musculus GN=Ctsd PE=1 SV=1
432	481	Q91WD5|NDUS2_MOUSE	4.7	222.08	21400	22600	1	1.06	21400	22600	1	1.06	-	-	23	14	11	Carbamidomethylation; TMT6plex	52626	NADH dehydrogenase [ubiquinone] iron-sulfur protein 2 mitochondrial OS=Mus musculus GN=Ndufs2 PE=1 SV=1
567	673	E9Q3L2|PI4KA_MOUSE	1.9	222.05	5030	4620	1	0.92	5030	4620	1	0.92	-	-	4	11	9	Carbamidomethylation; TMT6plex	237040	Phosphatidylinositol 4-kinase alpha OS=Mus musculus GN=Pi4ka PE=1 SV=2
567	674	tr|A0A140T8I9|A0A140T8I9_MOUSE	1.9	222.05	5030	4620	1	0.92	5030	4620	1	0.92	-	-	5	11	9	Carbamidomethylation; TMT6plex	231353	Phosphatidylinositol 4-kinase alpha OS=Mus musculus GN=Pi4ka PE=1 SV=1
569	757	P48758|CBR1_MOUSE	1.45	221.93	4090	4140	1	1.01	4090	4140	1	1.01	-	-	24	14	5	TMT6plex	30641	Carbonyl reductase [NADPH] 1 OS=Mus musculus GN=Cbr1 PE=1 SV=3
554	540	Q9JME5|AP3B2_MOUSE	1.77	221.91	10600	9240	1	0.88	10600	9240	1	0.88	-	-	13	14	14	Carbamidomethylation; TMT6plex	119192	AP-3 complex subunit beta-2 OS=Mus musculus GN=Ap3b2 PE=1 SV=2
692	610	tr|F8VPK5|F8VPK5_MOUSE	1.93	221.7	4960	4470	1	0.9	4960	4470	1	0.9	-	-	7	16	10	Carbamidomethylation; TMT6plex	160615	Rho-associated protein kinase OS=Mus musculus GN=Rock2 PE=1 SV=1
692	611	P70336|ROCK2_MOUSE	1.93	221.7	4960	4470	1	0.9	4960	4470	1	0.9	-	-	7	16	10	Carbamidomethylation; TMT6plex	160585	Rho-associated protein kinase 2 OS=Mus musculus GN=Rock2 PE=1 SV=1
435	846	P61164|ACTZ_MOUSE	1.28	221.48	1380	1600	1	1.16	1380	1600	1	1.16	-	-	2	11	1	TMT6plex	42614	Alpha-centractin OS=Mus musculus GN=Actr1a PE=1 SV=1
407	834	P47757|CAPZB_MOUSE	2.23	221.28	1210	1390	1	1.15	1210	1390	1	1.15	-	-	4	13	1	TMT6plex	31345	F-actin-capping protein subunit beta OS=Mus musculus GN=Capzb PE=1 SV=3
548	524	P27546|MAP4_MOUSE	4.03	221.22	2910	2530	1	0.87	2910	2530	1	0.87	-	-	6	11	6	TMT6plex	117429	Microtubule-associated protein 4 OS=Mus musculus GN=Map4 PE=1 SV=3
364	612	Q9QXY6|EHD3_MOUSE	0.64	220.92	4110	4040	1	0.98	4110	4040	1	0.98	-	-	19	17	7	Carbamidomethylation; TMT6plex	60821	EH domain-containing protein 3 OS=Mus musculus GN=Ehd3 PE=1 SV=2
620	750	P35564|CALX_MOUSE	3.06	220.91	22900	20100	1	0.88	22900	20100	1	0.88	-	-	26	18	18	TMT6plex; Oxidation (M)	67278	Calnexin OS=Mus musculus GN=Canx PE=1 SV=1
497	779	Q9CR62|M2OM_MOUSE	0.9	220.8	11100	11400	1	1.03	11100	11400	1	1.03	-	-	37	14	10	Carbamidomethylation; TMT6plex; Deamidation (NQ)	34155	Mitochondrial 2-oxoglutarate/malate carrier protein OS=Mus musculus GN=Slc25a11 PE=1 SV=3
600	552	Q9EQ20|MMSA_MOUSE	1.87	220.49	10400	11900	1	1.14	10400	11900	1	1.14	-	-	22	11	9	Carbamidomethylation; TMT6plex; Oxidation (M)	57916	Methylmalonate-semialdehyde dehydrogenase [acylating] mitochondrial OS=Mus musculus GN=Aldh6a1 PE=1 SV=1
590	580	O88844|IDHC_MOUSE	2.19	220.44	11500	12400	1	1.08	11500	12400	1	1.08	-	-	29	15	13	Carbamidomethylation; TMT6plex	46674	Isocitrate dehydrogenase [NADP] cytoplasmic OS=Mus musculus GN=Idh1 PE=1 SV=2
418	660	P12658|CALB1_MOUSE	4.79	220.09	16800	13800	1	0.82	16800	13800	1	0.82	-	-	35	13	10	Carbamidomethylation; TMT6plex; Oxidation (M)	29994	Calbindin OS=Mus musculus GN=Calb1 PE=1 SV=2
983	709	O70161|PI51C_MOUSE	2.92	220.05	7540	6310	1	0.84	7540	6310	1	0.84	-	-	19	12	10	Carbamidomethylation; TMT6plex; Deamidation (NQ)	72408	Phosphatidylinositol 4-phosphate 5-kinase type-1 gamma OS=Mus musculus GN=Pip5k1c PE=1 SV=2
983	710	tr|F8WHW6|F8WHW6_MOUSE	2.92	220.05	7540	6310	1	0.84	7540	6310	1	0.84	-	-	19	12	10	Carbamidomethylation; TMT6plex; Deamidation (NQ)	75516	Phosphatidylinositol 4-phosphate 5-kinase type-1 gamma OS=Mus musculus GN=Pip5k1c PE=1 SV=1
842	616	tr|E9Q0J5|E9Q0J5_MOUSE	1.83	219.93	2660	2430	1	0.91	2660	2430	1	0.91	-	-	4	8	5	Carbamidomethylation; TMT6plex	186635	Kinesin-like protein KIF21A OS=Mus musculus GN=Kif21a PE=1 SV=2
842	617	Q9QXL2|KI21A_MOUSE	1.83	219.93	2660	2430	1	0.91	2660	2430	1	0.91	-	-	4	8	5	Carbamidomethylation; TMT6plex	186535	Kinesin-like protein KIF21A OS=Mus musculus GN=Kif21a PE=1 SV=2
829	746	Q8R570|SNP47_MOUSE	3.04	219.86	4860	4040	1	0.83	4860	4040	1	0.83	-	-	22	9	7	TMT6plex	46524	Synaptosomal-associated protein 47 OS=Mus musculus GN=Snap47 PE=1 SV=1
477	565	P48036|ANXA5_MOUSE	7.31	219.72	23900	29000	1	1.22	23900	29000	1	1.22	-	-	43	15	14	TMT6plex; Oxidation (M)	35752	Annexin A5 OS=Mus musculus GN=Anxa5 PE=1 SV=1
249	833	tr|J3QMG3|J3QMG3_MOUSE	1	219.6	22200	22300	1	1	22200	22300	1	1	-	-	35	14	9	Carbamidomethylation; TMT6plex; Oxidation (M); Acetylation (Protein N-term); Deamidation (NQ)	30852	Voltage-dependent anion-selective channel protein 3 OS=Mus musculus GN=Vdac3 PE=1 SV=1
249	838	tr|A0A140T8V3|A0A140T8V3_MOUSE	1	219.6	22200	22300	1	1	22200	22300	1	1	-	-	35	14	9	Carbamidomethylation; TMT6plex; Oxidation (M); Acetylation (Protein N-term); Deamidation (NQ)	30696	Uncharacterized protein OS=Mus musculus GN=Vdac3-ps1 PE=4 SV=1
249	839	Q60931|VDAC3_MOUSE	1	219.6	22200	22300	1	1	22200	22300	1	1	-	-	35	14	9	Carbamidomethylation; TMT6plex; Oxidation (M); Acetylation (Protein N-term); Deamidation (NQ)	30753	Voltage-dependent anion-selective channel protein 3 OS=Mus musculus GN=Vdac3 PE=1 SV=1
398	1463	Q99PT1|GDIR1_MOUSE	2.93	219.53	30400	30100	1	0.99	30400	30100	1	0.99	-	-	59	16	13	Carbamidomethylation; TMT6plex; Oxidation (M)	23407	Rho GDP-dissociation inhibitor 1 OS=Mus musculus GN=Arhgdia PE=1 SV=3
421	697	P16054|KPCE_MOUSE	1.58	219.11	15500	14600	1	0.94	15500	14600	1	0.94	-	-	22	23	17	Carbamidomethylation; TMT6plex; Deamidation (NQ)	83561	Protein kinase C epsilon type OS=Mus musculus GN=Prkce PE=1 SV=1
558	594	P09103|PDIA1_MOUSE	1.59	219.04	9640	9200	1	0.95	9640	9200	1	0.95	-	-	20	17	11	TMT6plex; Deamidation (NQ)	57059	Protein disulfide-isomerase OS=Mus musculus GN=P4hb PE=1 SV=2
386	609	tr|F8WI65|F8WI65_MOUSE	1.8	218.79	2460	2190	1	0.89	2460	2190	1	0.89	-	-	6	17	3	Carbamidomethylation; TMT6plex	56944	Adenosylhomocysteinase OS=Mus musculus GN=Ahcyl2 PE=1 SV=1
386	614	tr|F8WGT1|F8WGT1_MOUSE	1.8	218.79	2460	2190	1	0.89	2460	2190	1	0.89	-	-	5	17	3	Carbamidomethylation; TMT6plex	66771	Adenosylhomocysteinase OS=Mus musculus GN=Ahcyl2 PE=1 SV=1
386	615	Q68FL4|SAHH3_MOUSE	1.8	218.79	2460	2190	1	0.89	2460	2190	1	0.89	-	-	5	17	3	Carbamidomethylation; TMT6plex	66899	Putative adenosylhomocysteinase 3 OS=Mus musculus GN=Ahcyl2 PE=1 SV=1
884	702	Q99MN9|PCCB_MOUSE	2.05	218.68	2210	2260	1	1.02	2210	2260	1	1.02	-	-	15	6	6	TMT6plex	58409	Propionyl-CoA carboxylase beta chain mitochondrial OS=Mus musculus GN=Pccb PE=1 SV=2
628	740	Q02248|CTNB1_MOUSE	3.12	218.54	10700	9450	1	0.89	10700	9450	1	0.89	-	-	10	10	7	Carbamidomethylation; TMT6plex	85471	Catenin beta-1 OS=Mus musculus GN=Ctnnb1 PE=1 SV=1
714	870	Q9QYS2|GRM3_MOUSE	2.18	218.27	3690	3460	1	0.94	3690	3460	1	0.94	-	-	8	15	7	Carbamidomethylation; TMT6plex	99114	Metabotropic glutamate receptor 3 OS=Mus musculus GN=Grm3 PE=1 SV=1
815	518	tr|A2AWI7|A2AWI7_MOUSE	2.16	218.22	8780	10200	1	1.16	8780	10200	1	1.16	-	-	35	13	12	Carbamidomethylation; TMT6plex; Deamidation (NQ)	44908	Endophilin-B2 OS=Mus musculus GN=Sh3glb2 PE=1 SV=1
772	541	tr|F7DCH5|F7DCH5_MOUSE	1.91	218.04	342	390.419	1	1.14	342	390.419	1	1.14	-	-	1	11	1	TMT6plex	142850	CLIP-associating protein 2 OS=Mus musculus GN=Clasp2 PE=1 SV=1
483	1046	Q8BVI4|DHPR_MOUSE	3.82	217.56	7310	9240	1	1.26	7310	9240	1	1.26	-	-	23	10	4	Carbamidomethylation; TMT6plex	25570	Dihydropteridine reductase OS=Mus musculus GN=Qdpr PE=1 SV=2
796	649	O70443|GNAZ_MOUSE	2.02	217.3	4090	3540	1	0.87	4090	3540	1	0.87	-	-	28	12	8	Carbamidomethylation; TMT6plex	40850	Guanine nucleotide-binding protein G(z) subunit alpha OS=Mus musculus GN=Gnaz PE=1 SV=4
729	888	Q9JKR6|HYOU1_MOUSE	2.65	217.18	4310	3510	1	0.81	4310	3510	1	0.81	-	-	7	12	7	TMT6plex	111181	Hypoxia up-regulated protein 1 OS=Mus musculus GN=Hyou1 PE=1 SV=1
760	947	P28474|ADHX_MOUSE	0.87	217	15800	15400	1	0.97	15800	15400	1	0.97	-	-	41	14	13	Carbamidomethylation; TMT6plex	39548	Alcohol dehydrogenase class-3 OS=Mus musculus GN=Adh5 PE=1 SV=3
447	681	P70704|AT8A1_MOUSE	2.04	216.98	9450	8500	1	0.9	9450	8500	1	0.9	-	-	8	13	11	Carbamidomethylation; TMT6plex	131413	Phospholipid-transporting ATPase IA OS=Mus musculus GN=Atp8a1 PE=1 SV=2
382	2044	P56564|EAA1_MOUSE	2.12	216.79	12100	11000	1	0.91	12100	11000	1	0.91	-	-	11	8	5	Carbamidomethylation; TMT6plex; Oxidation (M); Deamidation (NQ)	59622	Excitatory amino acid transporter 1 OS=Mus musculus GN=Slc1a3 PE=1 SV=2
491	759	Q91V61|SFXN3_MOUSE	0.54	216.7	11200	10700	1	0.96	11200	10700	1	0.96	-	-	31	10	6	TMT6plex	35406	Sideroflexin-3 OS=Mus musculus GN=Sfxn3 PE=1 SV=1
726	667	Q6ZPE2|MTMR5_MOUSE	3.68	216.52	1250	1070	1	0.85	1250	1070	1	0.85	-	-	3	5	3	TMT6plex; Deamidation (NQ)	208691	Myotubularin-related protein 5 OS=Mus musculus GN=Sbf1 PE=1 SV=2
506	916	Q7TQI3|OTUB1_MOUSE	2.99	216.49	28600	24100	1	0.84	28600	24100	1	0.84	-	-	44	12	11	Carbamidomethylation; TMT6plex	31270	Ubiquitin thioesterase OTUB1 OS=Mus musculus GN=Otub1 PE=1 SV=2
866	742	O08917|FLOT1_MOUSE	1.5	215.95	2520	2520	1	1	2520	2520	1	1	-	-	11	4	4	TMT6plex	47513	Flotillin-1 OS=Mus musculus GN=Flot1 PE=1 SV=1
405	625	Q9JI91|ACTN2_MOUSE	3.99	215.69	1970	1540	1	0.78	1970	1540	1	0.78	-	-	5	15	3	TMT6plex; Deamidation (NQ)	103834	Alpha-actinin-2 OS=Mus musculus GN=Actn2 PE=1 SV=2
325	1908	P62962|PROF1_MOUSE	3.1	215.47	47300	51800	1	1.09	47300	51800	1	1.09	-	-	56	7	7	TMT6plex; Oxidation (M); Deamidation (NQ)	14957	Profilin-1 OS=Mus musculus GN=Pfn1 PE=1 SV=2
424	1395	Q61171|PRDX2_MOUSE	1.67	215.46	71800	66300	1	0.92	71800	66300	1	0.92	-	-	47	9	7	Carbamidomethylation; TMT6plex; Deamidation (NQ)	21779	Peroxiredoxin-2 OS=Mus musculus GN=Prdx2 PE=1 SV=3
490	654	Q9R0Q6|ARC1A_MOUSE	1.85	215.4	27600	28600	1	1.04	27600	28600	1	1.04	-	-	49	19	16	Carbamidomethylation; TMT6plex; Deamidation (NQ)	41626	Actin-related protein 2/3 complex subunit 1A OS=Mus musculus GN=Arpc1a PE=1 SV=1
609	641	Q91WQ3|SYYC_MOUSE	1.76	215.32	11800	10900	1	0.92	11800	10900	1	0.92	-	-	28	18	16	Carbamidomethylation; TMT6plex	59105	Tyrosine--tRNA ligase cytoplasmic OS=Mus musculus GN=Yars PE=1 SV=3
609	642	tr|A2A7S7|A2A7S7_MOUSE	1.76	215.32	11800	10900	1	0.92	11800	10900	1	0.92	-	-	27	18	16	Carbamidomethylation; TMT6plex	63002	Tyrosine--tRNA ligase OS=Mus musculus GN=Yars PE=1 SV=1
745	626	Q8R071|IP3KA_MOUSE	1.24	215.23	9270	8580	1	0.92	9270	8580	1	0.92	-	-	24	10	10	Carbamidomethylation; TMT6plex	50935	Inositol-trisphosphate 3-kinase A OS=Mus musculus GN=Itpka PE=1 SV=1
633	856	P63330|PP2AA_MOUSE	1.47	215.08	1390	1340	1	0.96	1390	1340	1	0.96	-	-	4	8	1	Carbamidomethylation; TMT6plex	35608	Serine/threonine-protein phosphatase 2A catalytic subunit alpha isoform OS=Mus musculus GN=Ppp2ca PE=1 SV=1
808	588	Q3THK7|GUAA_MOUSE	2.57	215	3440	2970	1	0.86	3440	2970	1	0.86	-	-	11	8	7	Carbamidomethylation; TMT6plex	76724	GMP synthase [glutamine-hydrolyzing] OS=Mus musculus GN=Gmps PE=1 SV=2
720	570	tr|B1AX58|B1AX58_MOUSE	1.88	214.97	8170	7650	1	0.94	8170	7650	1	0.94	-	-	19	15	11	TMT6plex	71746	Plastin-3 OS=Mus musculus GN=Pls3 PE=1 SV=1
269	844	P62761|VISL1_MOUSE	2.75	214.54	55300	52100	1	0.94	55300	52100	1	0.94	-	-	56	13	11	Carbamidomethylation; TMT6plex; Oxidation (M)	22142	Visinin-like protein 1 OS=Mus musculus GN=Vsnl1 PE=1 SV=2
696	853	tr|E9Q8N8|E9Q8N8_MOUSE	2.17	214.43	13100	12900	1	0.99	13100	12900	1	0.99	-	-	15	14	13	Carbamidomethylation; TMT6plex	123086	Anion exchange protein OS=Mus musculus GN=Slc4a4 PE=1 SV=1
540	696	P28661|SEPT4_MOUSE	4.67	214.21	4250	4600	1	1.08	4250	4600	1	1.08	-	-	13	8	5	Carbamidomethylation; TMT6plex	54936	Septin-4 OS=Mus musculus GN=Sept4 PE=1 SV=1
710	631	Q9JLB0|MPP6_MOUSE	2.33	214.17	4570	4260	1	0.93	4570	4260	1	0.93	-	-	17	11	8	Carbamidomethylation; TMT6plex	62631	MAGUK p55 subfamily member 6 OS=Mus musculus GN=Mpp6 PE=1 SV=1
437	669	Q9Z1S5|SEPT3_MOUSE	0.94	213.34	23000	22400	1	0.97	23000	22400	1	0.97	-	-	39	16	12	Carbamidomethylation; TMT6plex	40038	Neuronal-specific septin-3 OS=Mus musculus GN=Sept3 PE=1 SV=2
694	892	P60843|IF4A1_MOUSE	1.31	213.2	865	719.948	1	0.83	865	719.948	1	0.83	-	-	3	11	1	TMT6plex	46154	Eukaryotic initiation factor 4A-I OS=Mus musculus GN=Eif4a1 PE=1 SV=1
292	1695	Q63810|CANB1_MOUSE	1.92	213.05	44100	43500	1	0.99	44100	43500	1	0.99	-	-	47	10	9	Carbamidomethylation; TMT6plex; Oxidation (M); Deamidation (NQ)	19300	Calcineurin subunit B type 1 OS=Mus musculus GN=Ppp3r1 PE=1 SV=3
906	577	Q8BIJ6|SYIM_MOUSE	1.68	212.93	4250	3860	1	0.91	4250	3860	1	0.91	-	-	12	10	9	Carbamidomethylation; TMT6plex; Deamidation (NQ)	112804	Isoleucine--tRNA ligase mitochondrial OS=Mus musculus GN=Iars2 PE=1 SV=1
560	939	O35737|HNRH1_MOUSE	2.98	212.78	646	495.486	1	0.77	646	495.486	1	0.77	-	-	5	13	2	Carbamidomethylation; TMT6plex	49199	Heterogeneous nuclear ribonucleoprotein H OS=Mus musculus GN=Hnrnph1 PE=1 SV=3
560	945	tr|Q8C2Q7|Q8C2Q7_MOUSE	2.98	212.78	646	495.486	1	0.77	646	495.486	1	0.77	-	-	5	13	2	Carbamidomethylation; TMT6plex	51218	Heterogeneous nuclear ribonucleoprotein H OS=Mus musculus GN=Hnrnph1 PE=1 SV=1
355	747	tr|Q91ZE6|Q91ZE6_MOUSE	1.58	212.65	2320	2040	1	0.88	2320	2040	1	0.88	-	-	1	13	4	TMT6plex; Deamidation (NQ)	288133	Spectrin beta chain OS=Mus musculus GN=Sptbn4 PE=1 SV=1
355	748	tr|E9PX29|E9PX29_MOUSE	1.58	212.65	2320	2040	1	0.88	2320	2040	1	0.88	-	-	1	13	4	TMT6plex; Deamidation (NQ)	288822	Spectrin beta chain OS=Mus musculus GN=Sptbn4 PE=1 SV=1
758	663	tr|Q3UHH4|Q3UHH4_MOUSE	3.52	212.54	4420	3970	1	0.9	4420	3970	1	0.9	-	-	10	9	6	TMT6plex; Deamidation (NQ)	83316	Putative uncharacterized protein OS=Mus musculus GN=Trim2 PE=1 SV=1
758	664	Q9ESN6|TRIM2_MOUSE	3.52	212.54	4420	3970	1	0.9	4420	3970	1	0.9	-	-	10	9	6	TMT6plex; Deamidation (NQ)	81445	Tripartite motif-containing protein 2 OS=Mus musculus GN=Trim2 PE=1 SV=1
758	665	tr|E9QKC6|E9QKC6_MOUSE	3.52	212.54	4420	3970	1	0.9	4420	3970	1	0.9	-	-	9	9	6	TMT6plex; Deamidation (NQ)	84319	Tripartite motif-containing protein 2 OS=Mus musculus GN=Trim2 PE=1 SV=1
970	730	tr|Q52KF7|Q52KF7_MOUSE	1.87	212.51	4210	3630	1	0.86	4210	3630	1	0.86	-	-	12	11	9	Carbamidomethylation; TMT6plex; Deamidation (NQ)	90328	Disks large homolog 3 OS=Mus musculus GN=Dlg3 PE=1 SV=1
970	733	P70175|DLG3_MOUSE	1.87	212.51	4210	3630	1	0.86	4210	3630	1	0.86	-	-	12	11	9	Carbamidomethylation; TMT6plex; Deamidation (NQ)	93482	Disks large homolog 3 OS=Mus musculus GN=Dlg3 PE=1 SV=1
970	734	tr|A2BEE9|A2BEE9_MOUSE	1.87	212.51	4210	3630	1	0.86	4210	3630	1	0.86	-	-	12	11	9	Carbamidomethylation; TMT6plex; Deamidation (NQ)	92115	Disks large homolog 3 OS=Mus musculus GN=Dlg3 PE=1 SV=1
914	752	Q8R1Q8|DC1L1_MOUSE	3.34	212.14	7380	6120	1	0.83	7380	6120	1	0.83	-	-	22	11	9	Carbamidomethylation; TMT6plex; Deamidation (NQ)	56614	Cytoplasmic dynein 1 light intermediate chain 1 OS=Mus musculus GN=Dync1li1 PE=1 SV=1
509	687	Q9Z268|RASL1_MOUSE	2.27	212.09	5400	4700	1	0.87	5400	4700	1	0.87	-	-	16	15	10	Carbamidomethylation; TMT6plex	89395	RasGAP-activating-like protein 1 OS=Mus musculus GN=Rasal1 PE=1 SV=2
571	1160	P09671|SODM_MOUSE	4.57	212	42300	49000	1	1.16	42300	49000	1	1.16	-	-	51	12	11	TMT6plex; Deamidation (NQ)	24603	Superoxide dismutase [Mn] mitochondrial OS=Mus musculus GN=Sod2 PE=1 SV=3
648	971	Q3U1J4|DDB1_MOUSE	0.97	211.93	3970	4110	1	1.04	3970	4110	1	1.04	-	-	9	15	9	TMT6plex	126853	DNA damage-binding protein 1 OS=Mus musculus GN=Ddb1 PE=1 SV=2
916	829	Q8BUV3|GEPH_MOUSE	1.75	211.47	6220	5550	1	0.89	6220	5550	1	0.89	-	-	11	8	7	Carbamidomethylation; TMT6plex; Deamidation (NQ)	83282	Gephyrin OS=Mus musculus GN=Gphn PE=1 SV=2
916	830	tr|A0JNY3|A0JNY3_MOUSE	1.75	211.47	6220	5550	1	0.89	6220	5550	1	0.89	-	-	11	8	7	Carbamidomethylation; TMT6plex; Deamidation (NQ)	83666	Gephyrin OS=Mus musculus GN=Gphn PE=1 SV=1
581	708	P09405|NUCL_MOUSE	3.08	211.03	11800	9650	1	0.82	11800	9650	1	0.82	-	-	21	18	14	TMT6plex	76723	Nucleolin OS=Mus musculus GN=Ncl PE=1 SV=2
580	635	tr|E9QMK2|E9QMK2_MOUSE	4.68	211.01	792	513.396	1	0.65	792	513.396	1	0.65	-	-	0	14	1	Carbamidomethylation; TMT6plex	178498	Versican core protein OS=Mus musculus GN=Vcan PE=1 SV=1
762	678	tr|Q91V89|Q91V89_MOUSE	1.23	210.98	1450	1400	1	0.96	1450	1400	1	0.96	-	-	8	12	4	Carbamidomethylation; TMT6plex	68995	Protein phosphatase 2 regulatory subunit B (B56) delta isoform OS=Mus musculus GN=Ppp2r5d PE=1 SV=1
1153	871	Q9CZ44|NSF1C_MOUSE	4.84	210.89	3030	2560	1	0.85	3030	2560	1	0.85	-	-	13	4	4	TMT6plex	40710	NSFL1 cofactor p47 OS=Mus musculus GN=Nsfl1c PE=1 SV=1
1014	1016	Q9DBF1|AL7A1_MOUSE	2.46	210.77	3140	2880	1	0.92	3140	2880	1	0.92	-	-	8	7	4	TMT6plex	58862	Alpha-aminoadipic semialdehyde dehydrogenase OS=Mus musculus GN=Aldh7a1 PE=1 SV=4
858	859	tr|Q924B0|Q924B0_MOUSE	1.8	210.74	12000	10900	1	0.91	12000	10900	1	0.91	-	-	46	11	11	Carbamidomethylation; TMT6plex; Deamidation (NQ)	30429	Inositol-1-monophosphatase OS=Mus musculus GN=Impa1 PE=1 SV=1
662	725	Q62418|DBNL_MOUSE	4.97	210.41	5370	3960	1	0.74	5370	3960	1	0.74	-	-	14	5	5	TMT6plex	48700	Drebrin-like protein OS=Mus musculus GN=Dbnl PE=1 SV=2
526	909	Q9D2G2|ODO2_MOUSE	1.24	210.14	17900	17600	1	0.98	17900	17600	1	0.98	-	-	19	10	8	TMT6plex; Oxidation (M)	48995	Dihydrolipoyllysine-residue succinyltransferase component of 2-oxoglutarate dehydrogenase complex mitochondrial OS=Mus musculus GN=Dlst PE=1 SV=1
1034	807	tr|A0A1D5RM83|A0A1D5RM83_MOUSE	1.54	209.89	1600	1560	1	0.98	1600	1560	1	0.98	-	-	3	7	3	TMT6plex	117929	IQ motif and SEC7 domain-containing protein 1 OS=Mus musculus GN=Iqsec1 PE=1 SV=1
873	1081	Q9D1A2|CNDP2_MOUSE	1.66	209.83	6660	6120	1	0.92	6660	6120	1	0.92	-	-	27	11	10	TMT6plex; Oxidation (M)	52767	Cytosolic non-specific dipeptidase OS=Mus musculus GN=Cndp2 PE=1 SV=1
371	1941	P12787|COX5A_MOUSE	7.11	209.82	51100	59200	1	1.16	51100	59200	1	1.16	-	-	60	11	10	TMT6plex; Oxidation (M); Deamidation (NQ)	16101	Cytochrome c oxidase subunit 5A mitochondrial OS=Mus musculus GN=Cox5a PE=1 SV=2
650	774	tr|Q8BTU6|Q8BTU6_MOUSE	1.22	209.66	3080	2790	1	0.9	3080	2790	1	0.9	-	-	14	12	4	TMT6plex; Oxidation (M)	41290	Eukaryotic initiation factor 4A-II OS=Mus musculus GN=Eif4a2 PE=1 SV=1
650	778	P10630|IF4A2_MOUSE	1.22	209.66	3080	2790	1	0.9	3080	2790	1	0.9	-	-	12	12	4	TMT6plex; Oxidation (M)	46402	Eukaryotic initiation factor 4A-II OS=Mus musculus GN=Eif4a2 PE=1 SV=2
535	684	Q80UG2|PLXA4_MOUSE	1.44	209.66	4100	3800	1	0.93	4100	3800	1	0.93	-	-	5	15	8	Carbamidomethylation; TMT6plex	212559	Plexin-A4 OS=Mus musculus GN=Plxna4 PE=1 SV=3
843	647	Q61768|KINH_MOUSE	2.96	209.57	1270	1520	1	1.2	1270	1520	1	1.2	-	-	4	9	4	Carbamidomethylation; TMT6plex	109551	Kinesin-1 heavy chain OS=Mus musculus GN=Kif5b PE=1 SV=3
563	1163	Q91V12|BACH_MOUSE	1.58	209.56	27200	24900	1	0.92	27200	24900	1	0.92	-	-	36	12	11	Carbamidomethylation; TMT6plex; Oxidation (M)	42537	Cytosolic acyl coenzyme A thioester hydrolase OS=Mus musculus GN=Acot7 PE=1 SV=2
563	1164	tr|E9PYH2|E9PYH2_MOUSE	1.58	209.56	27200	24900	1	0.92	27200	24900	1	0.92	-	-	35	12	11	Carbamidomethylation; TMT6plex; Oxidation (M)	42826	Cytosolic acyl coenzyme A thioester hydrolase OS=Mus musculus GN=Acot7 PE=1 SV=1
734	1085	Q80XN0|BDH_MOUSE	1.35	209.31	3850	3830	1	1	3850	3830	1	1	-	-	11	14	3	TMT6plex	38299	D-beta-hydroxybutyrate dehydrogenase mitochondrial OS=Mus musculus GN=Bdh1 PE=1 SV=2
458	812	P48774|GSTM5_MOUSE	1.44	209.14	19200	18700	1	0.98	19200	18700	1	0.98	-	-	37	11	9	Carbamidomethylation; TMT6plex; Oxidation (M)	26635	Glutathione S-transferase Mu 5 OS=Mus musculus GN=Gstm5 PE=1 SV=1
1081	1165	Q61151|2A5E_MOUSE	2.4	209.13	5100	4420	1	0.87	5100	4420	1	0.87	-	-	12	7	5	Carbamidomethylation; TMT6plex	54714	Serine/threonine-protein phosphatase 2A 56 kDa regulatory subunit epsilon isoform OS=Mus musculus GN=Ppp2r5e PE=1 SV=3
473	2209	P14231|AT1B2_MOUSE	1.1	208.92	40000	37400	1	0.94	40000	37400	1	0.94	-	-	35	13	11	Carbamidomethylation; TMT6plex; Oxidation (M); Deamidation (NQ)	33344	Sodium/potassium-transporting ATPase subunit beta-2 OS=Mus musculus GN=Atp1b2 PE=1 SV=2
300	1319	P50518|VATE1_MOUSE	4.15	208.88	39800	42600	1	1.07	39800	42600	1	1.07	-	-	31	14	9	TMT6plex; Oxidation (M); Deamidation (NQ)	26157	V-type proton ATPase subunit E 1 OS=Mus musculus GN=Atp6v1e1 PE=1 SV=2
653	707	P45376|ALDR_MOUSE	1.95	208.56	18800	19500	1	1.03	18800	19500	1	1.03	-	-	47	17	14	Carbamidomethylation; TMT6plex	35732	Aldose reductase OS=Mus musculus GN=Akr1b1 PE=1 SV=3
1233	1042	Q6ZPJ3|UBE2O_MOUSE	3.45	208.48	1810	1580	1	0.87	1810	1580	1	0.87	-	-	6	9	6	Carbamidomethylation; TMT6plex	140834	(E3-independent) E2 ubiquitin-conjugating enzyme UBE2O OS=Mus musculus GN=Ube2o PE=1 SV=3
776	820	P08226|APOE_MOUSE	2.26	208.15	7360	6920	1	0.94	7360	6920	1	0.94	-	-	31	10	9	TMT6plex; Deamidation (NQ)	35867	Apolipoprotein E OS=Mus musculus GN=Apoe PE=1 SV=2
471	1942	P84084|ARF5_MOUSE	1.1	208.1	3880	3600	1	0.93	3880	3600	1	0.93	-	-	24	10	4	TMT6plex	20530	ADP-ribosylation factor 5 OS=Mus musculus GN=Arf5 PE=1 SV=2
713	737	Q3TXS7|PSMD1_MOUSE	2.3	207.66	3670	3080	1	0.84	3670	3080	1	0.84	-	-	8	11	8	Carbamidomethylation; TMT6plex	105730	26S proteasome non-ATPase regulatory subunit 1 OS=Mus musculus GN=Psmd1 PE=1 SV=1
645	713	Q99JY0|ECHB_MOUSE	1.63	207.55	9210	10100	1	1.09	9210	10100	1	1.09	-	-	34	15	14	Carbamidomethylation; TMT6plex; Oxidation (M); Deamidation (NQ)	51386	Trifunctional enzyme subunit beta mitochondrial OS=Mus musculus GN=Hadhb PE=1 SV=1
1248	910	Q8BGH2|SAM50_MOUSE	2.4	207.3	3340	3230	1	0.97	3340	3230	1	0.97	-	-	20	8	8	Carbamidomethylation; TMT6plex	51864	Sorting and assembly machinery component 50 homolog OS=Mus musculus GN=Samm50 PE=1 SV=1
789	885	P51150|RAB7A_MOUSE	1.55	207.12	15200	13600	1	0.89	15200	13600	1	0.89	-	-	54	12	11	TMT6plex; Deamidation (NQ)	23490	Ras-related protein Rab-7a OS=Mus musculus GN=Rab7a PE=1 SV=2
703	789	tr|A0A0R4J0I9|A0A0R4J0I9_MOUSE	7.68	206.94	8330	9230	1	1.11	8330	9230	1	1.11	-	-	3	15	14	Carbamidomethylation; TMT6plex	504775	Low density lipoprotein receptor-related protein 1 OS=Mus musculus GN=Lrp1 PE=1 SV=1
703	790	Q91ZX7|LRP1_MOUSE	7.68	206.94	8330	9230	1	1.11	8330	9230	1	1.11	-	-	3	15	14	Carbamidomethylation; TMT6plex	504745	Prolow-density lipoprotein receptor-related protein 1 OS=Mus musculus GN=Lrp1 PE=1 SV=1
894	1520	Q99N28|CADM3_MOUSE	2.16	206.84	8740	8200	1	0.94	8740	8200	1	0.94	-	-	27	7	7	Carbamidomethylation; TMT6plex; Oxidation (M)	42964	Cell adhesion molecule 3 OS=Mus musculus GN=Cadm3 PE=1 SV=1
894	1521	tr|K4DI58|K4DI58_MOUSE	2.16	206.84	8740	8200	1	0.94	8740	8200	1	0.94	-	-	24	7	7	Carbamidomethylation; TMT6plex; Oxidation (M)	46692	Cell adhesion molecule 3 OS=Mus musculus GN=Cadm3 PE=1 SV=1
742	606	Q60902|EP15R_MOUSE	1.06	206.49	2260	2230	1	0.99	2260	2230	1	0.99	-	-	6	8	5	TMT6plex	99309	Epidermal growth factor receptor substrate 15-like 1 OS=Mus musculus GN=Eps15l1 PE=1 SV=3
761	668	tr|A0A1L1SVJ6|A0A1L1SVJ6_MOUSE	6.92	206.46	342	213.119	1	0.62	342	213.119	1	0.62	-	-	3	9	1	TMT6plex	36831	Alpha-actinin-4 (Fragment) OS=Mus musculus GN=Actn4 PE=1 SV=1
270	1166	P62823|RAB3C_MOUSE	6.98	206.41	8010	6880	1	0.86	8010	6880	1	0.86	-	-	31	11	5	TMT6plex	25872	Ras-related protein Rab-3C OS=Mus musculus GN=Rab3c PE=1 SV=1
341	1832	P19783|COX41_MOUSE	3.75	206.33	32800	36900	1	1.13	32800	36900	1	1.13	-	-	30	12	6	TMT6plex; Oxidation (M)	19530	Cytochrome c oxidase subunit 4 isoform 1 mitochondrial OS=Mus musculus GN=Cox4i1 PE=1 SV=2
1108	1952	P52760|RIDA_MOUSE	2.29	206.18	8310	9330	1	1.12	8310	9330	1	1.12	-	-	53	7	6	Carbamidomethylation; TMT6plex; Deamidation (NQ)	14255	2-iminobutanoate/2-iminopropanoate deaminase OS=Mus musculus GN=Rida PE=1 SV=3
282	804	P62821|RAB1A_MOUSE	1.95	206.01	9450	8670	1	0.92	9450	8670	1	0.92	-	-	29	13	5	TMT6plex; Oxidation (M)	22678	Ras-related protein Rab-1A OS=Mus musculus GN=Rab1A PE=1 SV=3
584	1065	B9EKR1|PRPTZ_MOUSE	3.36	206	27500	23900	1	0.87	27500	23900	1	0.87	-	-	5	14	12	Carbamidomethylation; TMT6plex; Oxidation (M)	254403	Receptor-type tyrosine-protein phosphatase zeta OS=Mus musculus GN=Ptprz1 PE=1 SV=1
522	735	Q8C1A5|THOP1_MOUSE	1.43	205.78	8510	8190	1	0.96	8510	8190	1	0.96	-	-	17	15	11	Carbamidomethylation; TMT6plex	78026	Thimet oligopeptidase OS=Mus musculus GN=Thop1 PE=1 SV=1
522	736	tr|A0A0R4IZY0|A0A0R4IZY0_MOUSE	1.43	205.78	8510	8190	1	0.96	8510	8190	1	0.96	-	-	17	15	11	Carbamidomethylation; TMT6plex	78027	Thimet oligopeptidase OS=Mus musculus GN=Thop1 PE=1 SV=1
453	1401	Q9QUI0|RHOA_MOUSE	4.04	205.66	4180	3230	1	0.77	4180	3230	1	0.77	-	-	11	11	2	Carbamidomethylation; TMT6plex; Oxidation (M)	21782	Transforming protein RhoA OS=Mus musculus GN=Rhoa PE=1 SV=1
602	604	Q8CAA7|PGM2L_MOUSE	2.98	205.4	14200	11700	1	0.82	14200	11700	1	0.82	-	-	24	15	13	Carbamidomethylation; TMT6plex	70280	Glucose 1 6-bisphosphate synthase OS=Mus musculus GN=Pgm2l1 PE=1 SV=1
897	772	P32921|SYWC_MOUSE	7.36	205.4	1200	1270	1	1.06	1200	1270	1	1.06	-	-	6	5	3	TMT6plex	54358	Tryptophan--tRNA ligase cytoplasmic OS=Mus musculus GN=Wars PE=1 SV=2
360	1304	Q9R0P5|DEST_MOUSE	2.08	205.26	29800	26800	1	0.9	29800	26800	1	0.9	-	-	65	14	12	Carbamidomethylation; TMT6plex; Oxidation (M); Deamidation (NQ)	18522	Destrin OS=Mus musculus GN=Dstn PE=1 SV=3
603	691	Q00493|CBPE_MOUSE	1.72	205.2	12100	10600	1	0.88	12100	10600	1	0.88	-	-	17	10	9	TMT6plex	53256	Carboxypeptidase E OS=Mus musculus GN=Cpe PE=1 SV=2
646	671	P26040|EZRI_MOUSE	3.17	205.15	6420	6210	1	0.97	6420	6210	1	0.97	-	-	18	15	11	TMT6plex	69407	Ezrin OS=Mus musculus GN=Ezr PE=1 SV=3
687	1339	Q9CPU0|LGUL_MOUSE	2.25	205.03	34700	37800	1	1.09	34700	37800	1	1.09	-	-	56	13	12	Carbamidomethylation; TMT6plex; Deamidation (NQ)	20810	Lactoylglutathione lyase OS=Mus musculus GN=Glo1 PE=1 SV=3
781	683	Q9Z2Y3|HOME1_MOUSE	2.92	204.95	9030	7410	1	0.82	9030	7410	1	0.82	-	-	32	14	11	TMT6plex; Oxidation (M); Deamidation (NQ)	41413	Homer protein homolog 1 OS=Mus musculus GN=Homer1 PE=1 SV=2
1056	1317	tr|Q99N15|Q99N15_MOUSE	5.41	204.91	1730	2390	1	1.38	1730	2390	1	1.38	-	-	28	5	5	Carbamidomethylation; TMT6plex	27274	17beta-hydroxysteroid dehydrogenase type 10/short chain L-3-hydroxyacyl-CoA dehydrogenase OS=Mus musculus GN=Hsd17b10 PE=1 SV=1
1056	1318	tr|A2AFQ2|A2AFQ2_MOUSE	5.41	204.91	1730	2390	1	1.38	1730	2390	1	1.38	-	-	27	5	5	Carbamidomethylation; TMT6plex	28374	3-hydroxyacyl-CoA dehydrogenase type-2 OS=Mus musculus GN=Hsd17b10 PE=1 SV=1
799	760	tr|Q8C483|Q8C483_MOUSE	0.79	204.38	6980	6520	1	0.93	6980	6520	1	0.93	-	-	17	10	9	Carbamidomethylation; TMT6plex	61167	Putative uncharacterized protein OS=Mus musculus GN=Sars PE=1 SV=1
683	985	P21278|GNA11_MOUSE	3.49	204.18	3870	3550	1	0.92	3870	3550	1	0.92	-	-	14	12	5	TMT6plex	42024	Guanine nucleotide-binding protein subunit alpha-11 OS=Mus musculus GN=Gna11 PE=1 SV=1
478	595	Q9CYT6|CAP2_MOUSE	1.27	204.13	8380	7590	1	0.91	8380	7590	1	0.91	-	-	22	9	8	TMT6plex	52862	Adenylyl cyclase-associated protein 2 OS=Mus musculus GN=Cap2 PE=1 SV=1
634	766	O35136|NCAM2_MOUSE	3.57	203.96	8840	6960	1	0.79	8840	6960	1	0.79	-	-	18	15	12	Carbamidomethylation; TMT6plex; Deamidation (NQ)	93204	Neural cell adhesion molecule 2 OS=Mus musculus GN=Ncam2 PE=1 SV=1
686	651	Q8BGT8|PHIPL_MOUSE	2.63	203.87	6440	5430	1	0.84	6440	5430	1	0.84	-	-	24	11	8	Carbamidomethylation; TMT6plex	42341	Phytanoyl-CoA hydroxylase-interacting protein-like OS=Mus musculus GN=Phyhipl PE=1 SV=1
1124	795	P47809|MP2K4_MOUSE	2.95	203.8	3500	3410	1	0.98	3500	3410	1	0.98	-	-	24	11	7	Carbamidomethylation; TMT6plex	44114	Dual specificity mitogen-activated protein kinase kinase 4 OS=Mus musculus GN=Map2k4 PE=1 SV=2
879	638	B0V2N1|PTPRS_MOUSE	1.69	203.72	2260	2160	1	0.95	2260	2160	1	0.95	-	-	2	7	3	TMT6plex	211902	Receptor-type tyrosine-protein phosphatase S OS=Mus musculus GN=Ptprs PE=1 SV=1
666	685	Q80TZ3|AUXI_MOUSE	1.95	203.31	11900	10400	1	0.87	11900	10400	1	0.87	-	-	9	12	8	Carbamidomethylation; TMT6plex; Oxidation (M)	102299	Putative tyrosine-protein phosphatase auxilin OS=Mus musculus GN=Dnajc6 PE=1 SV=2
372	1442	P63001|RAC1_MOUSE	3.88	203.19	22500	23300	1	1.04	22500	23300	1	1.04	-	-	21	10	3	Carbamidomethylation; TMT6plex; Oxidation (M)	21450	Ras-related C3 botulinum toxin substrate 1 OS=Mus musculus GN=Rac1 PE=1 SV=1
785	1888	P10605|CATB_MOUSE	1.5	203.18	9220	9650	1	1.05	9220	9650	1	1.05	-	-	19	7	7	Carbamidomethylation; TMT6plex	37280	Cathepsin B OS=Mus musculus GN=Ctsb PE=1 SV=2
946	775	P62334|PRS10_MOUSE	3.23	202.94	3310	2750	1	0.83	3310	2750	1	0.83	-	-	13	6	5	Carbamidomethylation; TMT6plex	44173	26S proteasome regulatory subunit 10B OS=Mus musculus GN=Psmc6 PE=1 SV=1
555	907	Q921M7|FA49B_MOUSE	2.58	202.9	4090	3600	1	0.88	4090	3600	1	0.88	-	-	20	8	4	TMT6plex; Deamidation (NQ)	36776	Protein FAM49B OS=Mus musculus GN=Fam49b PE=1 SV=1
940	941	Q9QYJ0|DNJA2_MOUSE	4.9	202.71	7660	6550	1	0.85	7660	6550	1	0.85	-	-	32	11	10	Carbamidomethylation; TMT6plex	45746	DnaJ homolog subfamily A member 2 OS=Mus musculus GN=Dnaja2 PE=1 SV=1
721	940	Q8C0M9|ASGL1_MOUSE	1.59	202.63	10300	10900	1	1.05	10300	10900	1	1.05	-	-	39	12	11	Carbamidomethylation; TMT6plex; Oxidation (M)	33950	Isoaspartyl peptidase/L-asparaginase OS=Mus musculus GN=Asrgl1 PE=1 SV=1
820	1664	P97315|CSRP1_MOUSE	8.58	202.57	18500	17800	1	0.96	18500	17800	1	0.96	-	-	50	9	8	Carbamidomethylation; TMT6plex; Oxidation (M)	20583	Cysteine and glycine-rich protein 1 OS=Mus musculus GN=Csrp1 PE=1 SV=3
512	1482	Q61885|MOG_MOUSE	4.32	202.44	393	454.892	1	1.16	393	454.892	1	1.16	-	-	5	8	1	TMT6plex	28271	Myelin-oligodendrocyte glycoprotein OS=Mus musculus GN=Mog PE=1 SV=1
512	1483	tr|Q3UY21|Q3UY21_MOUSE	4.32	202.44	393	454.892	1	1.16	393	454.892	1	1.16	-	-	5	8	1	TMT6plex	28374	Myelin-oligodendrocyte glycoprotein OS=Mus musculus GN=Mog PE=1 SV=1
656	1707	P62835|RAP1A_MOUSE	3.48	202.39	3190	2790	1	0.87	3190	2790	1	0.87	-	-	15	13	3	Carbamidomethylation; TMT6plex	20987	Ras-related protein Rap-1A OS=Mus musculus GN=Rap1a PE=1 SV=1
778	1030	tr|Q921L6|Q921L6_MOUSE	2.74	202.15	21200	18100	1	0.85	21200	18100	1	0.85	-	-	21	12	12	TMT6plex; Deamidation (NQ)	57086	Cortactin isoform CRA_a OS=Mus musculus GN=Cttn PE=1 SV=1
778	1032	Q60598|SRC8_MOUSE	2.74	202.15	21200	18100	1	0.85	21200	18100	1	0.85	-	-	20	12	12	TMT6plex; Deamidation (NQ)	61250	Src substrate cortactin OS=Mus musculus GN=Cttn PE=1 SV=2
827	1335	Q9DCW4|ETFB_MOUSE	1.97	201.98	13000	13800	1	1.06	13000	13800	1	1.06	-	-	41	9	9	Carbamidomethylation; TMT6plex	27623	Electron transfer flavoprotein subunit beta OS=Mus musculus GN=Etfb PE=1 SV=3
954	794	Q8BWT1|THIM_MOUSE	4.44	201.95	3000	3970	1	1.32	3000	3970	1	1.32	-	-	17	9	6	TMT6plex	41830	3-ketoacyl-CoA thiolase mitochondrial OS=Mus musculus GN=Acaa2 PE=1 SV=3
284	1045	P35700|PRDX1_MOUSE	1.27	201.93	74300	73500	1	0.99	74300	73500	1	0.99	-	-	52	13	10	Carbamidomethylation; TMT6plex; Oxidation (M); Deamidation (NQ)	22176	Peroxiredoxin-1 OS=Mus musculus GN=Prdx1 PE=1 SV=1
619	806	P70441|NHRF1_MOUSE	3.27	201.83	13600	11100	1	0.81	13600	11100	1	0.81	-	-	43	13	12	Carbamidomethylation; TMT6plex; Deamidation (NQ)	38600	Na(+)/H(+) exchange regulatory cofactor NHE-RF1 OS=Mus musculus GN=Slc9a3r1 PE=1 SV=3
402	1371	Q9D0M3|CY1_MOUSE	4.94	201.68	25700	23800	1	0.93	25700	23800	1	0.93	-	-	26	9	7	Carbamidomethylation; TMT6plex; Deamidation (NQ)	35328	Cytochrome c1 heme protein mitochondrial OS=Mus musculus GN=Cyc1 PE=1 SV=1
532	1102	P97300|NPTN_MOUSE	3.19	201.64	35800	29300	1	0.82	35800	29300	1	0.82	-	-	31	12	11	Carbamidomethylation; TMT6plex; Deamidation (NQ)	44373	Neuroplastin OS=Mus musculus GN=Nptn PE=1 SV=3
677	900	Q64514|TPP2_MOUSE	1.91	201.59	4590	4340	1	0.95	4590	4340	1	0.95	-	-	9	16	12	Carbamidomethylation; TMT6plex	139878	Tripeptidyl-peptidase 2 OS=Mus musculus GN=Tpp2 PE=1 SV=3
1156	1107	P54775|PRS6B_MOUSE	2.41	201.54	10700	9160	1	0.85	10700	9160	1	0.85	-	-	25	11	10	TMT6plex; Deamidation (NQ)	47408	26S proteasome regulatory subunit 6B OS=Mus musculus GN=Psmc4 PE=1 SV=2
1074	1115	Q6URW6|MYH14_MOUSE	3.58	201.53	867	722.933	1	0.83	867	722.933	1	0.83	-	-	1	11	2	TMT6plex	228584	Myosin-14 OS=Mus musculus GN=Myh14 PE=1 SV=1
1074	1116	tr|K3W4R2|K3W4R2_MOUSE	3.58	201.53	867	722.933	1	0.83	867	722.933	1	0.83	-	-	1	11	2	TMT6plex	228559	Myosin-14 OS=Mus musculus GN=Myh14 PE=1 SV=1
588	652	P63005|LIS1_MOUSE	2.43	201.46	25500	23600	1	0.92	25500	23600	1	0.92	-	-	44	18	17	Carbamidomethylation; TMT6plex; Deamidation (NQ)	46670	Platelet-activating factor acetylhydrolase IB subunit alpha OS=Mus musculus GN=Pafah1b1 PE=1 SV=2
777	672	O54991|CNTP1_MOUSE	0.93	201.38	4280	3950	1	0.92	4280	3950	1	0.92	-	-	7	11	9	Carbamidomethylation; TMT6plex; Deamidation (NQ)	156311	Contactin-associated protein 1 OS=Mus musculus GN=Cntnap1 PE=1 SV=2
557	1209	O35295|PURB_MOUSE	3.25	201.26	6760	5380	1	0.8	6760	5380	1	0.8	-	-	27	11	7	Carbamidomethylation; TMT6plex	33901	Transcriptional activator protein Pur-beta OS=Mus musculus GN=Purb PE=1 SV=3
826	936	tr|A2AEW8|A2AEW8_MOUSE	2.18	201.23	4040	3650	1	0.9	4040	3650	1	0.9	-	-	11	10	9	TMT6plex; Deamidation (NQ)	95913	GRIP1-associated protein 1 OS=Mus musculus GN=Gripap1 PE=1 SV=1
826	937	Q8VD04|GRAP1_MOUSE	2.18	201.23	4040	3650	1	0.9	4040	3650	1	0.9	-	-	12	10	9	TMT6plex; Deamidation (NQ)	92715	GRIP1-associated protein 1 OS=Mus musculus GN=Gripap1 PE=1 SV=1
395	832	Q6PB66|LPPRC_MOUSE	1.94	200.91	6310	6050	1	0.96	6310	6050	1	0.96	-	-	10	27	13	Carbamidomethylation; TMT6plex	156614	Leucine-rich PPR motif-containing protein mitochondrial OS=Mus musculus GN=Lrpprc PE=1 SV=2
597	921	P60469|LIPA3_MOUSE	1.51	200.87	2400	2160	1	0.9	2400	2160	1	0.9	-	-	5	12	5	TMT6plex	133426	Liprin-alpha-3 OS=Mus musculus GN=Ppfia3 PE=1 SV=2
449	1223	Q91V41|RAB14_MOUSE	1.67	200.8	16200	14400	1	0.89	16200	14400	1	0.89	-	-	68	15	12	Carbamidomethylation; TMT6plex; Deamidation (NQ)	23897	Ras-related protein Rab-14 OS=Mus musculus GN=Rab14 PE=1 SV=3
409	661	Q63844|MK03_MOUSE	1.16	200.75	8160	7440	1	0.91	8160	7440	1	0.91	-	-	24	17	9	TMT6plex; Deamidation (NQ)	43067	Mitogen-activated protein kinase 3 OS=Mus musculus GN=Mapk3 PE=1 SV=5
675	968	O35129|PHB2_MOUSE	2.87	200.66	11800	13800	1	1.17	11800	13800	1	1.17	-	-	34	13	11	TMT6plex	33296	Prohibitin-2 OS=Mus musculus GN=Phb2 PE=1 SV=1
601	1393	Q3TXX4|VGLU1_MOUSE	2.81	200.44	16400	14400	1	0.88	16400	14400	1	0.88	-	-	11	9	6	Carbamidomethylation; TMT6plex; Oxidation (M)	61637	Vesicular glutamate transporter 1 OS=Mus musculus GN=Slc17a7 PE=1 SV=2
601	1399	tr|A0A1B0GRU0|A0A1B0GRU0_MOUSE	2.81	200.44	16400	14400	1	0.88	16400	14400	1	0.88	-	-	10	9	6	Carbamidomethylation; TMT6plex; Oxidation (M)	64319	Vesicular glutamate transporter 1 OS=Mus musculus GN=Slc17a7 PE=1 SV=1
423	1407	tr|A2AEG6|A2AEG6_MOUSE	24.82	200.42	8100	9280	1	1.15	8100	9280	1	1.15	-	-	9	12	4	TMT6plex; Oxidation (M)	36197	Glycoprotein m6b isoform CRA_g OS=Mus musculus GN=Gpm6b PE=1 SV=1
1019	1858	P49722|PSA2_MOUSE	3.15	200.32	7780	6760	1	0.87	7780	6760	1	0.87	-	-	20	6	4	TMT6plex; Deamidation (NQ)	25927	Proteasome subunit alpha type-2 OS=Mus musculus GN=Psma2 PE=1 SV=3
980	978	Q922R8|PDIA6_MOUSE	2.28	200.14	3680	3580	1	0.97	3680	3580	1	0.97	-	-	19	8	7	TMT6plex; Deamidation (NQ)	48100	Protein disulfide-isomerase A6 OS=Mus musculus GN=Pdia6 PE=1 SV=3
1096	1189	Q99JR1|SFXN1_MOUSE	1.18	200.13	3610	3650	1	1.01	3610	3650	1	1.01	-	-	20	7	5	TMT6plex	35649	Sideroflexin-1 OS=Mus musculus GN=Sfxn1 PE=1 SV=3
427	1620	P06837|NEUM_MOUSE	14.12	199.92	47000	28600	1	0.61	47000	28600	1	0.61	-	-	50	10	9	TMT6plex	23632	Neuromodulin OS=Mus musculus GN=Gap43 PE=1 SV=1
882	864	P26041|MOES_MOUSE	3.44	199.74	1840	1540	1	0.84	1840	1540	1	0.84	-	-	5	10	4	TMT6plex	67767	Moesin OS=Mus musculus GN=Msn PE=1 SV=3
956	1491	P59279|RAB2B_MOUSE	2.18	199.63	1080	884.712	1	0.82	1080	884.712	1	0.82	-	-	10	11	2	Carbamidomethylation; TMT6plex	24198	Ras-related protein Rab-2B OS=Mus musculus GN=Rab2b PE=1 SV=1
513	1006	P62748|HPCL1_MOUSE	5.72	199.37	2840	2290	1	0.81	2840	2290	1	0.81	-	-	23	12	4	TMT6plex	22338	Hippocalcin-like protein 1 OS=Mus musculus GN=Hpcal1 PE=1 SV=2
552	1899	Q9D172|ES1_MOUSE	0.54	199.26	43500	43500	1	1	43500	43500	1	1	-	-	47	9	9	Carbamidomethylation; TMT6plex; Oxidation (M); Deamidation (NQ)	28090	ES1 protein homolog mitochondrial OS=Mus musculus GN=D10Jhu81e PE=1 SV=1
669	1017	P20917|MAG_MOUSE	1.23	199.25	9040	9940	1	1.1	9040	9940	1	1.1	-	-	16	10	8	Carbamidomethylation; TMT6plex	69260	Myelin-associated glycoprotein OS=Mus musculus GN=Mag PE=1 SV=2
669	1018	tr|A0A087WPR1|A0A087WPR1_MOUSE	1.23	199.25	9040	9940	1	1.1	9040	9940	1	1.1	-	-	16	10	8	Carbamidomethylation; TMT6plex	69388	Myelin-associated glycoprotein OS=Mus musculus GN=Mag PE=1 SV=1
764	1404	Q8BGZ1|HPCL4_MOUSE	3.46	198.72	3880	3300	1	0.85	3880	3300	1	0.85	-	-	40	7	5	Carbamidomethylation; TMT6plex	22215	Hippocalcin-like protein 4 OS=Mus musculus GN=Hpcal4 PE=1 SV=3
667	792	Q9JHI5|IVD_MOUSE	1.25	198.67	9540	9900	1	1.04	9540	9900	1	1.04	-	-	33	14	12	Carbamidomethylation; TMT6plex; Deamidation (NQ)	46325	Isovaleryl-CoA dehydrogenase mitochondrial OS=Mus musculus GN=Ivd PE=1 SV=1
780	1377	Q8BH95|ECHM_MOUSE	1.62	198.51	12700	12900	1	1.01	12700	12900	1	1.01	-	-	31	9	8	Carbamidomethylation; TMT6plex; Oxidation (M)	31474	Enoyl-CoA hydratase mitochondrial OS=Mus musculus GN=Echs1 PE=1 SV=1
527	1237	Q9D6J6|NDUV2_MOUSE	2.47	198.49	6420	7590	1	1.18	6420	7590	1	1.18	-	-	43	8	7	Carbamidomethylation; TMT6plex; Deamidation (NQ)	27285	NADH dehydrogenase [ubiquinone] flavoprotein 2 mitochondrial OS=Mus musculus GN=Ndufv2 PE=1 SV=2
331	1306	Q9DC51|GNAI3_MOUSE	2.63	198.13	329	459.668	1	1.4	329	459.668	1	1.4	-	-	4	12	1	TMT6plex	40538	Guanine nucleotide-binding protein G(k) subunit alpha OS=Mus musculus GN=Gnai3 PE=1 SV=3
1253	1296	Q9R0P3|ESTD_MOUSE	2.36	198.13	4920	5440	1	1.1	4920	5440	1	1.1	-	-	30	6	6	Carbamidomethylation; TMT6plex; Deamidation (NQ)	31320	S-formylglutathione hydrolase OS=Mus musculus GN=Esd PE=1 SV=1
1253	1297	tr|H3BKH6|H3BKH6_MOUSE	2.36	198.13	4920	5440	1	1.1	4920	5440	1	1.1	-	-	29	6	6	Carbamidomethylation; TMT6plex; Deamidation (NQ)	32829	S-formylglutathione hydrolase OS=Mus musculus GN=Esd PE=1 SV=1
831	1222	Q80TL0|PPM1E_MOUSE	4.35	198.12	6180	5240	1	0.85	6180	5240	1	0.85	-	-	12	10	8	Carbamidomethylation; TMT6plex; Deamidation (NQ)	83419	Protein phosphatase 1E OS=Mus musculus GN=Ppm1e PE=1 SV=2
547	1038	Q6R0H7|GNAS1_MOUSE	2.33	198.01	2470	2280	1	0.92	2470	2280	1	0.92	-	-	4	9	4	Carbamidomethylation; TMT6plex	121505	Guanine nucleotide-binding protein G(s) subunit alpha isoforms XLas OS=Mus musculus GN=Gnas PE=1 SV=1
525	767	Q9D8N0|EF1G_MOUSE	1.85	197.81	33100	29400	1	0.89	33100	29400	1	0.89	-	-	27	14	14	TMT6plex	50061	Elongation factor 1-gamma OS=Mus musculus GN=Eef1g PE=1 SV=3
670	2711	P97450|ATP5J_MOUSE	2.6	197.33	34300	31700	1	0.92	34300	31700	1	0.92	-	-	53	8	7	TMT6plex; Oxidation (M); Deamidation (NQ)	12496	ATP synthase-coupling factor 6 mitochondrial OS=Mus musculus GN=Atp5j PE=1 SV=1
828	771	tr|E9PVW8|E9PVW8_MOUSE	2.61	197.25	2420	1960	1	0.81	2420	1960	1	0.81	-	-	2	9	4	Carbamidomethylation; TMT6plex	169442	Receptor-type tyrosine-protein phosphatase delta OS=Mus musculus GN=Ptprd PE=1 SV=2
958	1147	P00493|HPRT_MOUSE	0.65	197.24	6510	6160	1	0.95	6510	6160	1	0.95	-	-	41	8	7	Carbamidomethylation; TMT6plex	24570	Hypoxanthine-guanine phosphoribosyltransferase OS=Mus musculus GN=Hprt1 PE=1 SV=3
847	957	tr|E9Q3Q6|E9Q3Q6_MOUSE	3.46	197.05	11700	9400	1	0.81	11700	9400	1	0.81	-	-	17	9	9	Carbamidomethylation; TMT6plex; Oxidation (M); Deamidation (NQ)	63669	CD166 antigen OS=Mus musculus GN=Alcam PE=1 SV=1
847	962	Q61490|CD166_MOUSE	3.46	197.05	11700	9400	1	0.81	11700	9400	1	0.81	-	-	17	9	9	Carbamidomethylation; TMT6plex; Oxidation (M); Deamidation (NQ)	65092	CD166 antigen OS=Mus musculus GN=Alcam PE=1 SV=3
544	1659	P20108|PRDX3_MOUSE	1.37	197.03	23400	21500	1	0.92	23400	21500	1	0.92	-	-	38	9	7	Carbamidomethylation; TMT6plex; Deamidation (NQ)	28127	Thioredoxin-dependent peroxide reductase mitochondrial OS=Mus musculus GN=Prdx3 PE=1 SV=1
457	1148	Q8BG39|SV2B_MOUSE	1.9	196.97	32400	28300	1	0.88	32400	28300	1	0.88	-	-	12	10	9	Carbamidomethylation; TMT6plex; Oxidation (M); Deamidation (NQ)	77457	Synaptic vesicle glycoprotein 2B OS=Mus musculus GN=Sv2b PE=1 SV=1
1008	902	tr|V9GWV1|V9GWV1_MOUSE	3.37	196.92	5410	5200	1	0.96	5410	5200	1	0.96	-	-	15	6	5	TMT6plex	44208	ADP-ribosylation factor GTPase-activating protein 1 OS=Mus musculus GN=Arfgap1 PE=1 SV=1
1008	908	tr|V9GXM1|V9GXM1_MOUSE	3.37	196.92	5410	5200	1	0.96	5410	5200	1	0.96	-	-	14	6	5	TMT6plex	46540	ADP-ribosylation factor GTPase-activating protein 1 OS=Mus musculus GN=Arfgap1 PE=1 SV=1
636	1051	Q8K0S0|PHYIP_MOUSE	1.17	196.92	15000	14300	1	0.96	15000	14300	1	0.96	-	-	19	8	6	Carbamidomethylation; TMT6plex	37555	Phytanoyl-CoA hydroxylase-interacting protein OS=Mus musculus GN=Phyhip PE=1 SV=1
989	841	Q8BH66|ATLA1_MOUSE	1	196.63	3770	3610	1	0.96	3770	3610	1	0.96	-	-	11	8	5	Carbamidomethylation; TMT6plex	63378	Atlastin-1 OS=Mus musculus GN=Atl1 PE=1 SV=1
644	739	P48678|LMNA_MOUSE	2.15	196.52	9590	10100	1	1.05	9590	10100	1	1.05	-	-	21	16	14	TMT6plex	74238	Prelamin-A/C OS=Mus musculus GN=Lmna PE=1 SV=2
730	781	Q8K212|PACS1_MOUSE	2	196.28	6760	5860	1	0.87	6760	5860	1	0.87	-	-	12	13	11	TMT6plex	104829	Phosphofurin acidic cluster sorting protein 1 OS=Mus musculus GN=Pacs1 PE=1 SV=2
766	1450	Q80ZJ1|RAP2A_MOUSE	1.76	196.25	1310	1110	1	0.85	1310	1110	1	0.85	-	-	9	10	2	TMT6plex	20642	Ras-related protein Rap-2a OS=Mus musculus GN=Rap2a PE=1 SV=2
274	938	tr|Q8C2Q8|Q8C2Q8_MOUSE	2.87	196.14	56200	66200	1	1.18	56200	66200	1	1.18	-	-	39	13	12	Carbamidomethylation; TMT6plex; Oxidation (M); Deamidation (NQ)	30256	ATP synthase subunit gamma OS=Mus musculus GN=Atp5c1 PE=1 SV=1
274	944	Q91VR2|ATPG_MOUSE	2.87	196.14	56200	66200	1	1.18	56200	66200	1	1.18	-	-	36	13	12	Carbamidomethylation; TMT6plex; Oxidation (M); Deamidation (NQ)	32886	ATP synthase subunit gamma mitochondrial OS=Mus musculus GN=Atp5c1 PE=1 SV=1
1136	840	P62196|PRS8_MOUSE	1.68	195.84	2730	2460	1	0.9	2730	2460	1	0.9	-	-	13	7	5	TMT6plex	45626	26S proteasome regulatory subunit 8 OS=Mus musculus GN=Psmc5 PE=1 SV=1
941	931	P26043|RADI_MOUSE	2.36	195.73	1350	1330	1	0.99	1350	1330	1	0.99	-	-	4	9	2	TMT6plex	68543	Radixin OS=Mus musculus GN=Rdx PE=1 SV=3
988	813	Q99K85|SERC_MOUSE	2.04	195.69	7460	8620	1	1.16	7460	8620	1	1.16	-	-	25	11	9	TMT6plex; Oxidation (M); Deamidation (NQ)	40473	Phosphoserine aminotransferase OS=Mus musculus GN=Psat1 PE=1 SV=1
1404	1379	Q9QZX7|SRR_MOUSE	0.97	195.54	5930	5680	1	0.96	5930	5680	1	0.96	-	-	19	5	4	Carbamidomethylation; TMT6plex	36359	Serine racemase OS=Mus musculus GN=Srr PE=1 SV=1
1325	1100	Q64737|PUR2_MOUSE	1.09	195.48	622	596.972	1	0.96	622	596.972	1	0.96	-	-	1	3	1	TMT6plex	107503	Trifunctional purine biosynthetic protein adenosine-3 OS=Mus musculus GN=Gart PE=1 SV=3
782	1008	Q07076|ANXA7_MOUSE	2.4	195.15	6450	5380	1	0.83	6450	5380	1	0.83	-	-	18	14	10	Carbamidomethylation; TMT6plex	49925	Annexin A7 OS=Mus musculus GN=Anxa7 PE=1 SV=2
651	1014	Q8BW96|KCC1D_MOUSE	0.83	195.08	5850	5460	1	0.93	5850	5460	1	0.93	-	-	16	10	5	TMT6plex	42919	Calcium/calmodulin-dependent protein kinase type 1D OS=Mus musculus GN=Camk1d PE=1 SV=2
848	1114	O70172|PI42A_MOUSE	1.32	194.94	871	765.318	1	0.88	871	765.318	1	0.88	-	-	5	10	2	TMT6plex	46152	Phosphatidylinositol 5-phosphate 4-kinase type-2 alpha OS=Mus musculus GN=Pip4k2a PE=1 SV=1
851	828	tr|G3UZI2|G3UZI2_MOUSE	1.34	194.92	3850	3450	1	0.9	3850	3450	1	0.9	-	-	14	11	6	TMT6plex	58752	Heterogeneous nuclear ribonucleoprotein Q OS=Mus musculus GN=Syncrip PE=1 SV=1
851	831	tr|A0A0R4J259|A0A0R4J259_MOUSE	1.34	194.92	3850	3450	1	0.9	3850	3450	1	0.9	-	-	13	11	6	TMT6plex	62544	Heterogeneous nuclear ribonucleoprotein Q OS=Mus musculus GN=Syncrip PE=1 SV=1
1119	810	tr|F8VPQ4|F8VPQ4_MOUSE	1.66	194.88	899	964.706	1	1.07	899	964.706	1	1.07	-	-	2	10	3	TMT6plex	124448	SLIT-ROBO Rho GTPase-activating protein 3 OS=Mus musculus GN=Srgap3 PE=1 SV=1
1119	811	Q812A2|SRGP3_MOUSE	1.66	194.88	899	964.706	1	1.07	899	964.706	1	1.07	-	-	2	10	3	TMT6plex	124420	SLIT-ROBO Rho GTPase-activating protein 3 OS=Mus musculus GN=Srgap3 PE=1 SV=1
865	847	P24527|LKHA4_MOUSE	3.21	194.58	10900	9680	1	0.89	10900	9680	1	0.89	-	-	18	11	10	Carbamidomethylation; TMT6plex; Deamidation (NQ)	69051	Leukotriene A-4 hydrolase OS=Mus musculus GN=Lta4h PE=1 SV=4
443	1608	P61089|UBE2N_MOUSE	3	194.56	25200	26800	1	1.07	25200	26800	1	1.07	-	-	52	9	7	TMT6plex	17138	Ubiquitin-conjugating enzyme E2 N OS=Mus musculus GN=Ube2n PE=1 SV=1
915	780	P60487|PLPP_MOUSE	1.13	194.56	2440	2670	1	1.09	2440	2670	1	1.09	-	-	21	5	5	Carbamidomethylation; TMT6plex	31512	Pyridoxal phosphate phosphatase OS=Mus musculus GN=Pdxp PE=1 SV=1
536	917	tr|Q4FE56|Q4FE56_MOUSE	1.05	194.49	2570	2350	1	0.91	2570	2350	1	0.91	-	-	2	13	6	Carbamidomethylation; TMT6plex	290214	Probable ubiquitin carboxyl-terminal hydrolase FAF-X OS=Mus musculus GN=Usp9x PE=1 SV=1
536	918	P70398|USP9X_MOUSE	1.05	194.49	2570	2350	1	0.91	2570	2350	1	0.91	-	-	2	13	6	Carbamidomethylation; TMT6plex	290709	Probable ubiquitin carboxyl-terminal hydrolase FAF-X OS=Mus musculus GN=Usp9x PE=1 SV=2
595	915	P11881|ITPR1_MOUSE	0.67	194.41	2070	2160	1	1.05	2070	2160	1	1.05	-	-	2	16	7	TMT6plex	313166	Inositol 1 4 5-trisphosphate receptor type 1 OS=Mus musculus GN=Itpr1 PE=1 SV=2
1059	987	Q9QZB7|ARP10_MOUSE	5.15	194.16	848	814.866	1	0.96	848	814.866	1	0.96	-	-	7	5	3	TMT6plex	46208	Actin-related protein 10 OS=Mus musculus GN=Actr10 PE=1 SV=2
746	1644	Q9CR95|NECP1_MOUSE	0.41	194.16	19400	19000	1	0.98	19400	19000	1	0.98	-	-	31	8	7	TMT6plex	29639	Adaptin ear-binding coat-associated protein 1 OS=Mus musculus GN=Necap1 PE=1 SV=2
961	1440	tr|A0A0R4J023|A0A0R4J023_MOUSE	0.97	193.95	9620	10400	1	1.08	9620	10400	1	1.08	-	-	32	11	10	Carbamidomethylation; TMT6plex	33338	Methylglutaconyl-CoA hydratase mitochondrial OS=Mus musculus GN=Auh PE=1 SV=1
961	1453	Q9JLZ3|AUHM_MOUSE	0.97	193.95	9620	10400	1	1.08	9620	10400	1	1.08	-	-	32	11	10	Carbamidomethylation; TMT6plex	33395	Methylglutaconyl-CoA hydratase mitochondrial OS=Mus musculus GN=Auh PE=1 SV=1
1727	1445	Q62465|VAT1_MOUSE	2.7	193.75	3190	3010	1	0.94	3190	3010	1	0.94	-	-	13	5	5	TMT6plex	43097	Synaptic vesicle membrane protein VAT-1 homolog OS=Mus musculus GN=Vat1 PE=1 SV=3
810	728	Q62108|DLG4_MOUSE	1.57	193.55	5490	5300	1	0.96	5490	5300	1	0.96	-	-	12	9	7	Carbamidomethylation; TMT6plex	80472	Disks large homolog 4 OS=Mus musculus GN=Dlg4 PE=1 SV=1
531	1210	P61294|RAB6B_MOUSE	3.66	193.48	1190	945.603	1	0.8	1190	945.603	1	0.8	-	-	16	11	3	TMT6plex	23462	Ras-related protein Rab-6B OS=Mus musculus GN=Rab6b PE=1 SV=1
717	1083	Q9DCD0|6PGD_MOUSE	2.36	193.33	7710	7520	1	0.97	7710	7520	1	0.97	-	-	18	12	8	TMT6plex	53247	6-phosphogluconate dehydrogenase decarboxylating OS=Mus musculus GN=Pgd PE=1 SV=3
784	1232	tr|Q8C845|Q8C845_MOUSE	5.63	193.23	7760	5730	1	0.74	7760	5730	1	0.74	-	-	18	10	5	TMT6plex	26800	EF-hand domain-containing protein D2 OS=Mus musculus GN=Efhd2 PE=1 SV=1
942	1175	Q14BI2|GRM2_MOUSE	1.13	193.19	3140	2840	1	0.91	3140	2840	1	0.91	-	-	5	10	5	Carbamidomethylation; TMT6plex	95887	Metabotropic glutamate receptor 2 OS=Mus musculus GN=Grm2 PE=1 SV=2
465	3092	tr|D6RHS6|D6RHS6_MOUSE	0.97	193.08	1280	1230	1	0.96	1280	1230	1	0.96	-	-	20	7	1	TMT6plex	14836	Phosphatidylethanolamine-binding protein 1 OS=Mus musculus GN=Pebp1 PE=1 SV=1
359	1028	Q9D1G1|RAB1B_MOUSE	1.16	193	2070	1910	1	0.92	2070	1910	1	0.92	-	-	16	10	2	TMT6plex	22187	Ras-related protein Rab-1B OS=Mus musculus GN=Rab1b PE=1 SV=1
1082	887	tr|Q8BRR9|Q8BRR9_MOUSE	2.75	192.74	2810	2280	1	0.81	2810	2280	1	0.81	-	-	9	7	5	TMT6plex	62347	Phosphodiesterase OS=Mus musculus GN=Pde1a PE=1 SV=1
1082	890	Q61481|PDE1A_MOUSE	2.75	192.74	2810	2280	1	0.81	2810	2280	1	0.81	-	-	9	7	5	TMT6plex	64529	Calcium/calmodulin-dependent 3' 5'-cyclic nucleotide phosphodiesterase 1A OS=Mus musculus GN=Pde1a PE=1 SV=2
722	1691	Q99JI6|RAP1B_MOUSE	2.33	192.68	405	414.298	1	1.02	405	414.298	1	1.02	-	-	8	12	1	TMT6plex	20825	Ras-related protein Rap-1b OS=Mus musculus GN=Rap1b PE=1 SV=2
688	988	Q9Z1N5|DX39B_MOUSE	4.82	192.57	1790	1460	1	0.81	1790	1460	1	0.81	-	-	2	10	1	Carbamidomethylation; TMT6plex	49035	Spliceosome RNA helicase Ddx39b OS=Mus musculus GN=Ddx39b PE=1 SV=1
441	1186	Q91X97|NCALD_MOUSE	2.15	192.57	11800	10100	1	0.86	11800	10100	1	0.86	-	-	39	11	5	Carbamidomethylation; TMT6plex	22245	Neurocalcin-delta OS=Mus musculus GN=Ncald PE=1 SV=4
737	1435	tr|F7D432|F7D432_MOUSE	1.85	192.44	19600	19500	1	0.99	19600	19500	1	0.99	-	-	46	10	9	Carbamidomethylation; TMT6plex; Oxidation (M); Deamidation (NQ)	29168	Protein-L-isoaspartate O-methyltransferase (Fragment) OS=Mus musculus GN=Pcmt1 PE=1 SV=1
737	1436	tr|E9PWE0|E9PWE0_MOUSE	1.85	192.44	19600	19500	1	0.99	19600	19500	1	0.99	-	-	44	10	9	Carbamidomethylation; TMT6plex; Oxidation (M); Deamidation (NQ)	30398	Protein-L-isoaspartate O-methyltransferase OS=Mus musculus GN=Pcmt1 PE=1 SV=1
737	1437	tr|E0CYV0|E0CYV0_MOUSE	1.85	192.44	19600	19500	1	0.99	19600	19500	1	0.99	-	-	43	10	9	Carbamidomethylation; TMT6plex; Oxidation (M); Deamidation (NQ)	30441	Protein-L-isoaspartate O-methyltransferase OS=Mus musculus GN=Pcmt1 PE=1 SV=1
492	964	Q6PER3|MARE3_MOUSE	1.24	192.35	1870	1820	1	0.97	1870	1820	1	0.97	-	-	10	13	2	TMT6plex	31966	Microtubule-associated protein RP/EB family member 3 OS=Mus musculus GN=Mapre3 PE=1 SV=1
689	1444	A2AN08|UBR4_MOUSE	5.36	192.33	697	601.747	1	0.86	697	601.747	1	0.86	-	-	0	10	2	TMT6plex	572298	E3 ubiquitin-protein ligase UBR4 OS=Mus musculus GN=Ubr4 PE=1 SV=1
1130	1376	Q641P0|ARP3B_MOUSE	1.95	192.32	1900	1660	1	0.87	1900	1660	1	0.87	-	-	7	6	2	TMT6plex	47580	Actin-related protein 3B OS=Mus musculus GN=Actr3b PE=1 SV=1
389	2383	P62897|CYC_MOUSE	46.38	192.28	65900	58900	1	0.89	65900	58900	1	0.89	-	-	39	11	5	TMT6plex; Oxidation (M)	11605	Cytochrome c somatic OS=Mus musculus GN=Cycs PE=1 SV=2
996	2245	P99026|PSB4_MOUSE	2.08	192.24	5080	5940	1	1.17	5080	5940	1	1.17	-	-	13	4	3	TMT6plex; Oxidation (M)	29116	Proteasome subunit beta type-4 OS=Mus musculus GN=Psmb4 PE=1 SV=1
711	1193	Q61036|PAK3_MOUSE	3.25	191.75	899	748.602	1	0.83	899	748.602	1	0.83	-	-	5	11	2	TMT6plex; Deamidation (NQ)	62398	Serine/threonine-protein kinase PAK 3 OS=Mus musculus GN=Pak3 PE=1 SV=2
1017	1140	Q9DCL9|PUR6_MOUSE	6.28	191.64	962	767.109	1	0.8	962	767.109	1	0.8	-	-	6	7	3	TMT6plex	47006	Multifunctional protein ADE2 OS=Mus musculus GN=Paics PE=1 SV=4
1257	817	P13020|GELS_MOUSE	2.9	191.55	3380	3370	1	1	3380	3370	1	1	-	-	12	11	7	Carbamidomethylation; TMT6plex	85942	Gelsolin OS=Mus musculus GN=Gsn PE=1 SV=3
1471	1637	O88441|MTX2_MOUSE	2.28	191.53	3050	3400	1	1.11	3050	3400	1	1.11	-	-	31	6	6	Carbamidomethylation; TMT6plex	29758	Metaxin-2 OS=Mus musculus GN=Mtx2 PE=1 SV=1
779	745	P46471|PRS7_MOUSE	2.87	191.52	5840	5900	1	1.01	5840	5900	1	1.01	-	-	25	13	10	TMT6plex	48648	26S proteasome regulatory subunit 7 OS=Mus musculus GN=Psmc2 PE=1 SV=5
779	749	tr|Q8BVQ9|Q8BVQ9_MOUSE	2.87	191.52	5840	5900	1	1.01	5840	5900	1	1.01	-	-	23	13	10	TMT6plex	52867	26S protease regulatory subunit 7 OS=Mus musculus GN=Psmc2 PE=1 SV=1
886	995	Q8VIJ6|SFPQ_MOUSE	2.06	191.45	10000	9270	1	0.93	10000	9270	1	0.93	-	-	15	12	12	TMT6plex	75442	Splicing factor proline- and glutamine-rich OS=Mus musculus GN=Sfpq PE=1 SV=1
747	1221	Q9Z2U1|PSA5_MOUSE	3.52	191.42	4560	4210	1	0.92	4560	4210	1	0.92	-	-	22	7	4	TMT6plex	26411	Proteasome subunit alpha type-5 OS=Mus musculus GN=Psma5 PE=1 SV=1
559	1233	O55125|NIPS1_MOUSE	1.89	191.36	18200	20600	1	1.13	18200	20600	1	1.13	-	-	40	13	10	Carbamidomethylation; TMT6plex; Oxidation (M)	33363	Protein NipSnap homolog 1 OS=Mus musculus GN=Nipsnap1 PE=1 SV=1
1677	1252	tr|E9QM38|E9QM38_MOUSE	2.27	191.21	3340	3720	1	1.11	3340	3720	1	1.11	-	-	6	7	6	TMT6plex	130668	Solute carrier family 12 member 2 OS=Mus musculus GN=Slc12a2 PE=1 SV=1
909	1525	P26645|MARCS_MOUSE	15.55	191.17	27500	14700	1	0.53	27500	14700	1	0.53	-	-	44	8	8	TMT6plex; Deamidation (NQ)	29661	Myristoylated alanine-rich C-kinase substrate OS=Mus musculus GN=Marcks PE=1 SV=2
964	2080	Q05816|FABP5_MOUSE	2.3	191.11	20100	17200	1	0.86	20100	17200	1	0.86	-	-	78	10	10	Carbamidomethylation; TMT6plex; Oxidation (M)	15137	Fatty acid-binding protein epidermal OS=Mus musculus GN=Fabp5 PE=1 SV=3
1211	1968	Q9QXV0|PCSK1_MOUSE	1.6	191.05	5410	5040	1	0.93	5410	5040	1	0.93	-	-	19	4	4	TMT6plex	27270	ProSAAS OS=Mus musculus GN=Pcsk1n PE=1 SV=2
943	1257	P29758|OAT_MOUSE	1.67	190.98	4340	4190	1	0.96	4340	4190	1	0.96	-	-	17	9	8	Carbamidomethylation; TMT6plex	48355	Ornithine aminotransferase mitochondrial OS=Mus musculus GN=Oat PE=1 SV=1
655	1939	tr|Q9D881|Q9D881_MOUSE	3.05	190.95	23000	21400	1	0.93	23000	21400	1	0.93	-	-	23	6	4	TMT6plex; Oxidation (M)	13847	Cytochrome c oxidase subunit 5B mitochondrial OS=Mus musculus GN=Cox5b PE=1 SV=1
655	1950	P19536|COX5B_MOUSE	3.05	190.95	23000	21400	1	0.93	23000	21400	1	0.93	-	-	23	6	4	TMT6plex; Oxidation (M)	13813	Cytochrome c oxidase subunit 5B mitochondrial OS=Mus musculus GN=Cox5b PE=1 SV=1
922	787	Q60634|FLOT2_MOUSE	2.52	190.88	7500	6860	1	0.91	7500	6860	1	0.91	-	-	26	12	11	TMT6plex	47038	Flotillin-2 OS=Mus musculus GN=Flot2 PE=1 SV=2
922	788	tr|Q5SS83|Q5SS83_MOUSE	2.52	190.88	7500	6860	1	0.91	7500	6860	1	0.91	-	-	26	12	11	TMT6plex	47116	Flotillin 2 isoform CRA_a OS=Mus musculus GN=Flot2 PE=1 SV=1
592	1467	Q9CQI6|COTL1_MOUSE	1.97	190.73	28700	29100	1	1.01	28700	29100	1	1.01	-	-	51	8	7	Carbamidomethylation; TMT6plex	15944	Coactosin-like protein OS=Mus musculus GN=Cotl1 PE=1 SV=3
408	984	Q9CQQ7|AT5F1_MOUSE	1.14	190.72	38300	37800	1	0.99	38300	37800	1	0.99	-	-	33	10	10	Carbamidomethylation; TMT6plex; Oxidation (M)	28949	ATP synthase F(0) complex subunit B1 mitochondrial OS=Mus musculus GN=Atp5f1 PE=1 SV=1
736	1647	Q9WV55|VAPA_MOUSE	4.83	190.68	15400	14800	1	0.96	15400	14800	1	0.96	-	-	33	9	8	Carbamidomethylation; TMT6plex	27855	Vesicle-associated membrane protein-associated protein A OS=Mus musculus GN=Vapa PE=1 SV=2
1071	2407	P52503|NDUS6_MOUSE	3.27	190.63	14200	13100	1	0.92	14200	13100	1	0.92	-	-	41	5	5	Carbamidomethylation; TMT6plex	13020	NADH dehydrogenase [ubiquinone] iron-sulfur protein 6 mitochondrial OS=Mus musculus GN=Ndufs6 PE=1 SV=2
1457	1300	Q920P5|KAD5_MOUSE	4.91	190.56	2200	2370	1	1.08	2200	2370	1	1.08	-	-	10	6	4	TMT6plex; Deamidation (NQ)	63323	Adenylate kinase isoenzyme 5 OS=Mus musculus GN=Ak5 PE=1 SV=2
750	1358	P61226|RAP2B_MOUSE	3.58	190.5	2640	2080	1	0.79	2640	2080	1	0.79	-	-	19	10	3	Carbamidomethylation; TMT6plex	20504	Ras-related protein Rap-2b OS=Mus musculus GN=Rap2b PE=1 SV=1
1261	1195	Q3UYC0|PPM1H_MOUSE	3.44	190.35	2250	2080	1	0.92	2250	2080	1	0.92	-	-	16	7	6	TMT6plex	56380	Protein phosphatase 1H OS=Mus musculus GN=Ppm1h PE=1 SV=1
732	1755	Q9CR68|UCRI_MOUSE	4.31	189.96	18400	18800	1	1.03	18400	18800	1	1.03	-	-	31	10	9	TMT6plex	29368	Cytochrome b-c1 complex subunit Rieske mitochondrial OS=Mus musculus GN=Uqcrfs1 PE=1 SV=1
553	977	P53810|PIPNA_MOUSE	1.28	189.8	15900	14800	1	0.93	15900	14800	1	0.93	-	-	27	11	7	TMT6plex	31893	Phosphatidylinositol transfer protein alpha isoform OS=Mus musculus GN=Pitpna PE=1 SV=2
1241	932	tr|B1AU25|B1AU25_MOUSE	0.63	189.66	2740	2590	1	0.95	2740	2590	1	0.95	-	-	10	6	5	TMT6plex	66114	Apoptosis-inducing factor 1 mitochondrial OS=Mus musculus GN=Aifm1 PE=1 SV=1
1241	933	Q9Z0X1|AIFM1_MOUSE	0.63	189.66	2740	2590	1	0.95	2740	2590	1	0.95	-	-	9	6	5	TMT6plex	66766	Apoptosis-inducing factor 1 mitochondrial OS=Mus musculus GN=Aifm1 PE=1 SV=1
1339	1422	tr|E9Q3B9|E9Q3B9_MOUSE	2.36	189.62	5630	5340	1	0.95	5630	5340	1	0.95	-	-	33	8	8	Carbamidomethylation; TMT6plex	35257	Monoglyceride lipase OS=Mus musculus GN=Mgll PE=1 SV=1
1339	1426	O35678|MGLL_MOUSE	2.36	189.62	5630	5340	1	0.95	5630	5340	1	0.95	-	-	34	8	8	Carbamidomethylation; TMT6plex	33388	Monoglyceride lipase OS=Mus musculus GN=Mgll PE=1 SV=1
1339	1427	tr|D3YYS6|D3YYS6_MOUSE	2.36	189.62	5630	5340	1	0.95	5630	5340	1	0.95	-	-	31	8	8	Carbamidomethylation; TMT6plex	36654	Monoglyceride lipase OS=Mus musculus GN=Mgll PE=1 SV=1
68	1326	A2AQ07|TBB1_MOUSE	1.15	189.53	2260	1920	1	0.85	2260	1920	1	0.85	-	-	4	12	1	TMT6plex	50441	Tubulin beta-1 chain OS=Mus musculus GN=Tubb1 PE=1 SV=1
816	1098	P25444|RS2_MOUSE	6.51	189.49	8410	5810	1	0.69	8410	5810	1	0.69	-	-	19	9	5	Carbamidomethylation; TMT6plex; Deamidation (NQ)	31231	40S ribosomal protein S2 OS=Mus musculus GN=Rps2 PE=1 SV=3
604	1979	P31650|S6A11_MOUSE	1.82	189.45	21000	19700	1	0.94	21000	19700	1	0.94	-	-	7	9	5	Carbamidomethylation; TMT6plex; Deamidation (NQ)	69961	Sodium- and chloride-dependent GABA transporter 3 OS=Mus musculus GN=Slc6a11 PE=1 SV=2
1087	946	Q91YQ5|RPN1_MOUSE	0.71	189.44	3120	2960	1	0.95	3120	2960	1	0.95	-	-	13	10	8	TMT6plex	68528	Dolichyl-diphosphooligosaccharide--protein glycosyltransferase subunit 1 OS=Mus musculus GN=Rpn1 PE=1 SV=1
518	1226	P70206|PLXA1_MOUSE	2.43	189.34	760	951.573	1	1.25	760	951.573	1	1.25	-	-	2	12	2	TMT6plex; Deamidation (NQ)	211098	Plexin-A1 OS=Mus musculus GN=Plxna1 PE=1 SV=1
1331	1082	P70663|SPRL1_MOUSE	2.98	189.16	1390	1350	1	0.97	1390	1350	1	0.97	-	-	5	4	3	Carbamidomethylation; TMT6plex	72287	SPARC-like protein 1 OS=Mus musculus GN=Sparcl1 PE=1 SV=3
1120	1260	tr|E9PZM8|E9PZM8_MOUSE	1.03	189.04	911	786.809	1	0.86	911	786.809	1	0.86	-	-	3	8	1	TMT6plex	52336	Neuronal pentraxin receptor OS=Mus musculus GN=Nptxr PE=1 SV=2
1120	1261	tr|F7BX42|F7BX42_MOUSE	1.03	189.04	911	786.809	1	0.86	911	786.809	1	0.86	-	-	3	8	1	TMT6plex	52318	Neuronal pentraxin receptor OS=Mus musculus GN=Nptxr PE=1 SV=1
910	1301	tr|Q68FL0|Q68FL0_MOUSE	2.21	189.01	10600	10600	1	1	10600	10600	1	1	-	-	11	10	8	TMT6plex; Oxidation (M)	106663	Slc8a1 protein OS=Mus musculus GN=Slc8a1 PE=1 SV=1
910	1302	tr|G3X9J1|G3X9J1_MOUSE	2.21	189.01	10600	10600	1	1	10600	10600	1	1	-	-	11	10	8	TMT6plex; Oxidation (M)	108038	Sodium/calcium exchanger 1 OS=Mus musculus GN=Slc8a1 PE=1 SV=1
910	1303	tr|G5E8Y0|G5E8Y0_MOUSE	2.21	189.01	10600	10600	1	1	10600	10600	1	1	-	-	11	10	8	TMT6plex; Oxidation (M)	107958	Sodium/calcium exchanger 1 OS=Mus musculus GN=Slc8a1 PE=1 SV=2
534	1923	Q62159|RHOC_MOUSE	2.57	188.84	488	538.468	1	1.1	488	538.468	1	1.1	-	-	6	10	1	Carbamidomethylation; TMT6plex	22006	Rho-related GTP-binding protein RhoC OS=Mus musculus GN=Rhoc PE=1 SV=2
1473	1488	P62881|GNB5_MOUSE	2.1	188.72	3300	3480	1	1.05	3300	3480	1	1.05	-	-	16	6	5	Carbamidomethylation; TMT6plex	43565	Guanine nucleotide-binding protein subunit beta-5 OS=Mus musculus GN=Gnb5 PE=1 SV=1
1163	1523	Q61081|CDC37_MOUSE	1.25	188.66	3650	3530	1	0.97	3650	3530	1	0.97	-	-	17	9	7	TMT6plex	44593	Hsp90 co-chaperone Cdc37 OS=Mus musculus GN=Cdc37 PE=1 SV=1
893	850	Q80TL4|PHF24_MOUSE	1.32	188.64	10000	9590	1	0.96	10000	9590	1	0.96	-	-	25	10	10	Carbamidomethylation; TMT6plex	45223	PHD finger protein 24 OS=Mus musculus GN=Phf24 PE=1 SV=2
889	1133	Q9ESW4|AGK_MOUSE	2.49	188.63	3700	3440	1	0.93	3700	3440	1	0.93	-	-	13	7	4	TMT6plex	46976	Acylglycerol kinase mitochondrial OS=Mus musculus GN=Agk PE=1 SV=1
788	1813	tr|Q7M6W1|Q7M6W1_MOUSE	3.41	188.45	2950	2520	1	0.85	2950	2520	1	0.85	-	-	9	7	2	Carbamidomethylation; TMT6plex	23558	Reticulon OS=Mus musculus GN=Rtn1 PE=1 SV=1
1116	2162	tr|Q3TTF6|Q3TTF6_MOUSE	1.34	188.41	910	753.378	1	0.83	910	753.378	1	0.83	-	-	2	8	1	TMT6plex	72743	Putative uncharacterized protein OS=Mus musculus GN=Ppp2r1b PE=1 SV=1
635	1309	Q8BLK3|LSAMP_MOUSE	3.31	188.29	14400	11700	1	0.81	14400	11700	1	0.81	-	-	27	10	8	Carbamidomethylation; TMT6plex; Deamidation (NQ)	38086	Limbic system-associated membrane protein OS=Mus musculus GN=Lsamp PE=1 SV=1
635	1314	tr|Q3TYE5|Q3TYE5_MOUSE	3.31	188.29	14400	11700	1	0.81	14400	11700	1	0.81	-	-	27	10	8	Carbamidomethylation; TMT6plex; Deamidation (NQ)	37310	Limbic system-associated membrane protein OS=Mus musculus GN=Lsamp PE=1 SV=1
1289	1576	tr|Q8BG33|Q8BG33_MOUSE	3.07	188.26	1590	1140	1	0.72	1590	1140	1	0.72	-	-	3	5	1	TMT6plex	37941	Neurotrimin OS=Mus musculus GN=Ntm PE=1 SV=1
1289	1580	tr|D3Z396|D3Z396_MOUSE	3.07	188.26	1590	1140	1	0.72	1590	1140	1	0.72	-	-	3	5	1	TMT6plex	34955	Neurotrimin OS=Mus musculus GN=Ntm PE=1 SV=1
1289	1581	Q99PJ0|NTRI_MOUSE	3.07	188.26	1590	1140	1	0.72	1590	1140	1	0.72	-	-	3	5	1	TMT6plex	37984	Neurotrimin OS=Mus musculus GN=Ntm PE=1 SV=2
236	2123	P35802|GPM6A_MOUSE	6.2	188.18	86800	64900	1	0.75	86800	64900	1	0.75	-	-	22	11	9	Carbamidomethylation; TMT6plex; Oxidation (M); Acetylation (Protein N-term); Deamidation (NQ)	31149	Neuronal membrane glycoprotein M6-a OS=Mus musculus GN=Gpm6a PE=1 SV=1
888	1380	P97351|RS3A_MOUSE	3.55	188.13	12900	10400	1	0.8	12900	10400	1	0.8	-	-	42	15	12	Carbamidomethylation; TMT6plex	29885	40S ribosomal protein S3a OS=Mus musculus GN=Rps3a PE=1 SV=3
1219	1215	Q9JMH6|TRXR1_MOUSE	1.15	188.08	3340	3280	1	0.98	3340	3280	1	0.98	-	-	14	7	7	TMT6plex	67084	Thioredoxin reductase 1 cytoplasmic OS=Mus musculus GN=Txnrd1 PE=1 SV=3
738	1675	P60766|CDC42_MOUSE	2.91	188.07	16800	14000	1	0.83	16800	14000	1	0.83	-	-	42	8	7	Carbamidomethylation; TMT6plex	21259	Cell division control protein 42 homolog OS=Mus musculus GN=Cdc42 PE=1 SV=2
811	904	Q64105|SPRE_MOUSE	1.39	188.07	7950	8010	1	1.01	7950	8010	1	1.01	-	-	40	9	9	Carbamidomethylation; TMT6plex	27883	Sepiapterin reductase OS=Mus musculus GN=Spr PE=1 SV=1
811	911	tr|Q91XH5|Q91XH5_MOUSE	1.39	188.07	7950	8010	1	1.01	7950	8010	1	1.01	-	-	40	9	9	Carbamidomethylation; TMT6plex	27928	Sepiapterin reductase OS=Mus musculus GN=Spr PE=1 SV=1
1570	1514	Q9Z0S1|BPNT1_MOUSE	1.26	187.9	3970	4250	1	1.07	3970	4250	1	1.07	-	-	21	7	5	Carbamidomethylation; TMT6plex	33196	3'(2') 5'-bisphosphate nucleotidase 1 OS=Mus musculus GN=Bpnt1 PE=1 SV=2
1570	1516	tr|A0A1B0GRV0|A0A1B0GRV0_MOUSE	1.26	187.9	3970	4250	1	1.07	3970	4250	1	1.07	-	-	20	7	5	Carbamidomethylation; TMT6plex	34974	3'(2') 5'-bisphosphate nucleotidase 1 OS=Mus musculus GN=Bpnt1 PE=1 SV=1
856	1022	Q9D7G0|PRPS1_MOUSE	2.01	187.83	8530	9180	1	1.08	8530	9180	1	1.08	-	-	14	9	4	Carbamidomethylation; TMT6plex	34834	Ribose-phosphate pyrophosphokinase 1 OS=Mus musculus GN=Prps1 PE=1 SV=4
856	1023	tr|G3UXL2|G3UXL2_MOUSE	2.01	187.83	8530	9180	1	1.08	8530	9180	1	1.08	-	-	14	9	4	Carbamidomethylation; TMT6plex	34824	Phosphoribosyl pyrophosphate synthetase 1-like 3 OS=Mus musculus GN=Prps1l3 PE=3 SV=1
680	873	P21619|LMNB2_MOUSE	2.07	187.82	3590	3800	1	1.06	3590	3800	1	1.06	-	-	14	13	9	TMT6plex	67318	Lamin-B2 OS=Mus musculus GN=Lmnb2 PE=1 SV=2
680	876	tr|A0A0R4J0Q5|A0A0R4J0Q5_MOUSE	2.07	187.82	3590	3800	1	1.06	3590	3800	1	1.06	-	-	14	13	9	TMT6plex	69085	Lamin-B2 OS=Mus musculus GN=Lmnb2 PE=1 SV=1
1048	1381	Q61937|NPM_MOUSE	5.66	187.71	10600	8640	1	0.81	10600	8640	1	0.81	-	-	30	9	9	TMT6plex; Deamidation (NQ)	32560	Nucleophosmin OS=Mus musculus GN=Npm1 PE=1 SV=1
891	1086	P48320|DCE2_MOUSE	3.51	187.5	6910	5500	1	0.8	6910	5500	1	0.8	-	-	12	10	7	Carbamidomethylation; TMT6plex	65224	Glutamate decarboxylase 2 OS=Mus musculus GN=Gad2 PE=1 SV=1
678	1066	Q08331|CALB2_MOUSE	4.7	187.34	16800	13200	1	0.79	16800	13200	1	0.79	-	-	21	9	7	TMT6plex	31373	Calretinin OS=Mus musculus GN=Calb2 PE=1 SV=3
748	881	Q922B2|SYDC_MOUSE	1.74	187.29	5570	5100	1	0.92	5570	5100	1	0.92	-	-	17	12	9	Carbamidomethylation; TMT6plex	57147	Aspartate--tRNA ligase cytoplasmic OS=Mus musculus GN=Dars PE=1 SV=2
508	2280	P08228|SODC_MOUSE	4.86	187.02	103000	88000	1	0.86	103000	88000	1	0.86	-	-	43	6	6	Carbamidomethylation; TMT6plex	15943	Superoxide dismutase [Cu-Zn] OS=Mus musculus GN=Sod1 PE=1 SV=2
330	2187	Q62277|SYPH_MOUSE	3.87	186.95	105000	88400	1	0.84	105000	88400	1	0.84	-	-	18	7	7	Carbamidomethylation; TMT6plex; Oxidation (M); Deamidation (NQ)	34025	Synaptophysin OS=Mus musculus GN=Syp PE=1 SV=2
1167	1298	Q9Z2U0|PSA7_MOUSE	1.61	186.91	6660	6470	1	0.97	6660	6470	1	0.97	-	-	13	8	5	TMT6plex	27855	Proteasome subunit alpha type-7 OS=Mus musculus GN=Psma7 PE=1 SV=1
1091	1074	Q9DC07|LNEBL_MOUSE	3.79	186.9	4530	3630	1	0.8	4530	3630	1	0.8	-	-	11	6	3	Carbamidomethylation; TMT6plex	31113	LIM zinc-binding domain-containing Nebulette OS=Mus musculus GN=Nebl PE=1 SV=1
1347	1338	Q8CAY6|THIC_MOUSE	0.43	186.81	5310	5380	1	1.01	5310	5380	1	1.01	-	-	26	6	6	Carbamidomethylation; TMT6plex; Deamidation (NQ)	41298	Acetyl-CoA acetyltransferase cytosolic OS=Mus musculus GN=Acat2 PE=1 SV=2
668	1024	Q9Z0H8|CLIP2_MOUSE	2.9	186.7	3870	3600	1	0.93	3870	3600	1	0.93	-	-	8	15	8	TMT6plex	115910	CAP-Gly domain-containing linker protein 2 OS=Mus musculus GN=Clip2 PE=1 SV=2
944	1285	tr|F8WJK8|F8WJK8_MOUSE	1.39	186.7	16300	17100	1	1.05	16300	17100	1	1.05	-	-	24	9	8	Carbamidomethylation; TMT6plex	40539	Hsc70-interacting protein OS=Mus musculus GN=St13 PE=1 SV=1
944	1287	Q99L47|F10A1_MOUSE	1.39	186.7	16300	17100	1	1.05	16300	17100	1	1.05	-	-	24	9	8	Carbamidomethylation; TMT6plex	41656	Hsc70-interacting protein OS=Mus musculus GN=St13 PE=1 SV=1
899	2320	tr|A0A0A0MQM0|A0A0A0MQM0_MOUSE	4.45	186.67	29300	23300	1	0.8	29300	23300	1	0.8	-	-	41	7	7	Carbamidomethylation; TMT6plex; Deamidation (NQ)	16303	Eukaryotic translation initiation factor 5A (Fragment) OS=Mus musculus GN=Eif5a PE=1 SV=1
899	2321	P63242|IF5A1_MOUSE	4.45	186.67	29300	23300	1	0.8	29300	23300	1	0.8	-	-	40	7	7	Carbamidomethylation; TMT6plex; Deamidation (NQ)	16832	Eukaryotic translation initiation factor 5A-1 OS=Mus musculus GN=Eif5a PE=1 SV=2
707	912	tr|Q3UHT7|Q3UHT7_MOUSE	3.75	186.38	2050	1950	1	0.95	2050	1950	1	0.95	-	-	5	13	5	TMT6plex; Deamidation (NQ)	113057	ERC protein 2 OS=Mus musculus GN=Erc2 PE=1 SV=1
707	913	Q6PH08|ERC2_MOUSE	3.75	186.38	2050	1950	1	0.95	2050	1950	1	0.95	-	-	6	13	5	TMT6plex; Deamidation (NQ)	110639	ERC protein 2 OS=Mus musculus GN=Erc2 PE=1 SV=2
854	1367	Q8R5M8|CADM1_MOUSE	5.77	186.37	938	706.814	1	0.75	938	706.814	1	0.75	-	-	7	8	2	TMT6plex	49789	Cell adhesion molecule 1 OS=Mus musculus GN=Cadm1 PE=1 SV=2
854	1375	tr|E9PYN1|E9PYN1_MOUSE	5.77	186.37	938	706.814	1	0.75	938	706.814	1	0.75	-	-	7	8	2	TMT6plex	51689	Cell adhesion molecule 1 OS=Mus musculus GN=Cadm1 PE=1 SV=1
1242	1244	Q8BFZ9|ERLN2_MOUSE	2.55	186.21	3330	2850	1	0.86	3330	2850	1	0.86	-	-	20	8	7	Carbamidomethylation; TMT6plex	37873	Erlin-2 OS=Mus musculus GN=Erlin2 PE=1 SV=1
1020	824	O35685|NUDC_MOUSE	1	186.19	6610	6720	1	1.02	6610	6720	1	1.02	-	-	31	10	10	TMT6plex; Deamidation (NQ)	38358	Nuclear migration protein nudC OS=Mus musculus GN=Nudc PE=1 SV=1
1135	717	Q9Z1Z2|STRAP_MOUSE	1.89	186.12	5600	4990	1	0.89	5600	4990	1	0.89	-	-	34	10	10	Carbamidomethylation; TMT6plex	38442	Serine-threonine kinase receptor-associated protein OS=Mus musculus GN=Strap PE=1 SV=2
2216	1299	Q3UMR5|MCU_MOUSE	3.24	186.07	3410	3530	1	1.04	3410	3530	1	1.04	-	-	29	8	8	Carbamidomethylation; TMT6plex	39682	Calcium uniporter protein mitochondrial OS=Mus musculus GN=Mcu PE=1 SV=2
510	1475	P45591|COF2_MOUSE	2.21	186.05	5640	5000	1	0.89	5640	5000	1	0.89	-	-	45	9	6	Carbamidomethylation; TMT6plex; Deamidation (NQ)	18710	Cofilin-2 OS=Mus musculus GN=Cfl2 PE=1 SV=1
523	891	Q9CR16|PPID_MOUSE	2.23	185.97	18800	16700	1	0.89	18800	16700	1	0.89	-	-	26	13	11	TMT6plex; Deamidation (NQ)	40743	Peptidyl-prolyl cis-trans isomerase D OS=Mus musculus GN=Ppid PE=1 SV=3
985	1812	Q8K183|PDXK_MOUSE	2.21	185.87	7170	7610	1	1.06	7170	7610	1	1.06	-	-	19	5	5	TMT6plex	35015	Pyridoxal kinase OS=Mus musculus GN=Pdxk PE=1 SV=1
948	1069	Q922D8|C1TC_MOUSE	0.38	185.6	3700	3740	1	1.01	3700	3740	1	1.01	-	-	7	10	6	TMT6plex	101200	C-1-tetrahydrofolate synthase cytoplasmic OS=Mus musculus GN=Mthfd1 PE=1 SV=4
812	1334	Q8BKZ9|ODPX_MOUSE	0.81	185.29	13100	13100	1	1	13100	13100	1	1	-	-	20	13	10	Carbamidomethylation; TMT6plex	53999	Pyruvate dehydrogenase protein X component mitochondrial OS=Mus musculus GN=Pdhx PE=1 SV=1
913	1726	P57722|PCBP3_MOUSE	5.02	185.13	748	685.323	1	0.92	748	685.323	1	0.92	-	-	6	6	2	Carbamidomethylation; TMT6plex	39294	Poly(rC)-binding protein 3 OS=Mus musculus GN=Pcbp3 PE=1 SV=3
802	905	Q91ZJ5|UGPA_MOUSE	1.17	185.12	16300	15000	1	0.92	16300	15000	1	0.92	-	-	32	15	15	TMT6plex	56979	UTP--glucose-1-phosphate uridylyltransferase OS=Mus musculus GN=Ugp2 PE=1 SV=3
1315	893	tr|Q8JZN2|Q8JZN2_MOUSE	2.47	184.99	2400	2160	1	0.9	2400	2160	1	0.9	-	-	5	5	5	TMT6plex	85653	Cold shock domain-containing protein E1 OS=Mus musculus GN=Csde1 PE=1 SV=1
1315	896	Q91W50|CSDE1_MOUSE	2.47	184.99	2400	2160	1	0.9	2400	2160	1	0.9	-	-	5	5	5	TMT6plex	88791	Cold shock domain-containing protein E1 OS=Mus musculus GN=Csde1 PE=1 SV=1
892	835	tr|E9PUE7|E9PUE7_MOUSE	1.54	184.84	7670	6810	1	0.89	7670	6810	1	0.89	-	-	14	12	11	Carbamidomethylation; TMT6plex	92487	Active breakpoint cluster region-related protein OS=Mus musculus GN=Abr PE=1 SV=1
892	837	Q5SSL4|ABR_MOUSE	1.54	184.84	7670	6810	1	0.89	7670	6810	1	0.89	-	-	13	12	11	Carbamidomethylation; TMT6plex	97667	Active breakpoint cluster region-related protein OS=Mus musculus GN=Abr PE=1 SV=1
1292	914	P68040|RACK1_MOUSE	1.25	184.82	5290	5270	1	1	5290	5270	1	1	-	-	30	9	8	Carbamidomethylation; TMT6plex; Oxidation (M)	35077	Receptor of activated protein C kinase 1 OS=Mus musculus GN=Rack1 PE=1 SV=3
759	860	Q80U28|MADD_MOUSE	3.56	184.71	2130	2480	1	1.16	2130	2480	1	1.16	-	-	4	8	5	Carbamidomethylation; TMT6plex	175179	MAP kinase-activating death domain protein OS=Mus musculus GN=Madd PE=1 SV=2
759	861	tr|A2AGR0|A2AGR0_MOUSE	3.56	184.71	2130	2480	1	1.16	2130	2480	1	1.16	-	-	4	8	5	Carbamidomethylation; TMT6plex	175105	MAP kinase-activating death domain protein OS=Mus musculus GN=Madd PE=1 SV=1
1105	1094	Q6NS52|DGKB_MOUSE	1.45	184.66	4920	4380	1	0.89	4920	4380	1	0.89	-	-	14	11	10	Carbamidomethylation; TMT6plex	90272	Diacylglycerol kinase beta OS=Mus musculus GN=Dgkb PE=1 SV=2
1297	2292	Q8K021|SCAM1_MOUSE	3.28	184.63	6810	5500	1	0.81	6810	5500	1	0.81	-	-	29	7	7	TMT6plex; Deamidation (NQ)	38029	Secretory carrier-associated membrane protein 1 OS=Mus musculus GN=Scamp1 PE=1 SV=1
1696	1894	Q62433|NDRG1_MOUSE	3.57	184.61	5800	5580	1	0.96	5800	5580	1	0.96	-	-	6	3	2	TMT6plex	43009	Protein NDRG1 OS=Mus musculus GN=Ndrg1 PE=1 SV=1
1126	1361	Q8CDN6|TXNL1_MOUSE	6.48	184.47	2060	1880	1	0.91	2060	1880	1	0.91	-	-	20	4	4	TMT6plex	32237	Thioredoxin-like protein 1 OS=Mus musculus GN=Txnl1 PE=1 SV=3
1125	976	tr|Q8VHM5|Q8VHM5_MOUSE	3.32	184.46	3020	2400	1	0.79	3020	2400	1	0.79	-	-	9	9	5	Carbamidomethylation; TMT6plex	70888	Heterogeneous nuclear ribonucleoprotein R OS=Mus musculus GN=Hnrnpr PE=1 SV=1
289	2183	P09041|PGK2_MOUSE	2.87	184.38	1230	1190	1	0.96	1230	1190	1	0.96	-	-	7	13	2	TMT6plex; Deamidation (NQ)	44853	Phosphoglycerate kinase 2 OS=Mus musculus GN=Pgk2 PE=1 SV=4
1102	1130	Q9WTP7|KAD3_MOUSE	1.55	184.01	5910	6440	1	1.09	5910	6440	1	1.09	-	-	33	7	7	TMT6plex	25426	GTP:AMP phosphotransferase AK3 mitochondrial OS=Mus musculus GN=Ak3 PE=1 SV=3
346	1865	Q9CZT8|RAB3B_MOUSE	4.14	183.82	3190	3330	1	1.04	3190	3330	1	1.04	-	-	20	9	3	Carbamidomethylation; TMT6plex	24757	Ras-related protein Rab-3B OS=Mus musculus GN=Rab3b PE=1 SV=1
977	815	tr|Q5UE59|Q5UE59_MOUSE	2.22	183.79	7250	6720	1	0.93	7250	6720	1	0.93	-	-	17	10	9	Carbamidomethylation; TMT6plex	61630	Kinesin light chain 1 OS=Mus musculus GN=Klc1 PE=1 SV=1
977	816	tr|E9Q7C9|E9Q7C9_MOUSE	2.22	183.79	7250	6720	1	0.93	7250	6720	1	0.93	-	-	16	10	9	Carbamidomethylation; TMT6plex	63734	Kinesin light chain 1 OS=Mus musculus GN=Klc1 PE=1 SV=1
977	822	tr|Q7TNF4|Q7TNF4_MOUSE	2.22	183.79	7250	6720	1	0.93	7250	6720	1	0.93	-	-	15	10	9	Carbamidomethylation; TMT6plex	68603	Kinesin light chain 1 OS=Mus musculus GN=Klc1 PE=1 SV=1
977	823	tr|Q8CD76|Q8CD76_MOUSE	2.22	183.79	7250	6720	1	0.93	7250	6720	1	0.93	-	-	15	10	9	Carbamidomethylation; TMT6plex	69495	Kinesin light chain 1 OS=Mus musculus GN=Klc1 PE=1 SV=1
1051	927	Q9EPL8|IPO7_MOUSE	2.49	183.7	4630	3810	1	0.82	4630	3810	1	0.82	-	-	8	10	8	TMT6plex	119486	Importin-7 OS=Mus musculus GN=Ipo7 PE=1 SV=2
1639	1227	Q9ERG2|STRN3_MOUSE	2	183.64	621	683.533	1	1.1	621	683.533	1	1.1	-	-	4	6	2	TMT6plex	87150	Striatin-3 OS=Mus musculus GN=Strn3 PE=1 SV=1
1028	1337	P55264|ADK_MOUSE	2.49	183.59	4870	4150	1	0.85	4870	4150	1	0.85	-	-	22	10	7	Carbamidomethylation; TMT6plex	40149	Adenosine kinase OS=Mus musculus GN=Adk PE=1 SV=2
533	858	Q3ULJ0|GPD1L_MOUSE	2.42	183.26	10600	9400	1	0.89	10600	9400	1	0.89	-	-	20	12	8	Carbamidomethylation; TMT6plex; Deamidation (NQ)	38226	Glycerol-3-phosphate dehydrogenase 1-like protein OS=Mus musculus GN=Gpd1l PE=1 SV=2
1196	1414	P26231|CTNA1_MOUSE	3.03	183.09	241	278.189	1	1.15	241	278.189	1	1.15	-	-	1	7	1	TMT6plex	100106	Catenin alpha-1 OS=Mus musculus GN=Ctnna1 PE=1 SV=1
850	1548	Q8CIN4|PAK2_MOUSE	3.17	183.07	1500	1360	1	0.91	1500	1360	1	0.91	-	-	6	10	2	TMT6plex	57930	Serine/threonine-protein kinase PAK 2 OS=Mus musculus GN=Pak2 PE=1 SV=1
1380	1956	Q99M71|EPDR1_MOUSE	4.06	183.06	3220	2620	1	0.81	3220	2620	1	0.81	-	-	24	7	5	TMT6plex; Oxidation (M)	25485	Mammalian ependymin-related protein 1 OS=Mus musculus GN=Epdr1 PE=1 SV=1
1063	1656	Q9WUK2|IF4H_MOUSE	1.56	183	2840	2580	1	0.91	2840	2580	1	0.91	-	-	13	6	4	TMT6plex	27341	Eukaryotic translation initiation factor 4H OS=Mus musculus GN=Eif4h PE=1 SV=3
1093	1710	P57746|VATD_MOUSE	1.75	182.97	9980	8880	1	0.89	9980	8880	1	0.89	-	-	28	7	7	TMT6plex	28369	V-type proton ATPase subunit D OS=Mus musculus GN=Atp6v1d PE=1 SV=1
960	1397	Q9WUR9|KAD4_MOUSE	2.77	182.85	6520	7460	1	1.14	6520	7460	1	1.14	-	-	34	7	7	TMT6plex	25062	Adenylate kinase 4 mitochondrial OS=Mus musculus GN=Ak4 PE=1 SV=1
791	3427	Q9CPQ8|ATP5L_MOUSE	4.83	182.85	12400	15600	1	1.26	12400	15600	1	1.26	-	-	50	8	7	TMT6plex; Oxidation (M)	11425	ATP synthase subunit g mitochondrial OS=Mus musculus GN=Atp5l PE=1 SV=1
1403	1084	Q80TB8|VAT1L_MOUSE	6.57	182.72	3710	2660	1	0.72	3710	2660	1	0.72	-	-	15	6	6	Carbamidomethylation; TMT6plex	45817	Synaptic vesicle membrane protein VAT-1 homolog-like OS=Mus musculus GN=Vat1l PE=1 SV=2
895	2218	Q60605|MYL6_MOUSE	2.7	182.66	9280	8160	1	0.88	9280	8160	1	0.88	-	-	51	7	7	TMT6plex; Oxidation (M); Deamidation (NQ)	16930	Myosin light polypeptide 6 OS=Mus musculus GN=Myl6 PE=1 SV=3
895	2219	tr|A0A1W2P6F6|A0A1W2P6F6_MOUSE	2.7	182.66	9280	8160	1	0.88	9280	8160	1	0.88	-	-	51	7	7	TMT6plex; Oxidation (M); Deamidation (NQ)	17005	Myosin light polypeptide 6 OS=Mus musculus GN=Myl6 PE=1 SV=1
895	2220	tr|A0A1W2P7Q9|A0A1W2P7Q9_MOUSE	2.7	182.66	9280	8160	1	0.88	9280	8160	1	0.88	-	-	49	7	7	TMT6plex; Oxidation (M); Deamidation (NQ)	17673	Myosin light polypeptide 6 OS=Mus musculus GN=Myl6 PE=1 SV=1
605	2032	tr|A2AEG3|A2AEG3_MOUSE	5.82	182.65	2450	2450	1	1	2450	2450	1	1	-	-	3	10	2	Carbamidomethylation; TMT6plex	33515	Glycoprotein m6b isoform CRA_a OS=Mus musculus GN=Gpm6b PE=1 SV=1
1104	796	tr|Q6PF96|Q6PF96_MOUSE	1.4	182.59	3990	3840	1	0.96	3990	3840	1	0.96	-	-	17	8	8	Carbamidomethylation; TMT6plex	61161	Electron transfer flavoprotein-ubiquinone oxidoreductase mitochondrial OS=Mus musculus GN=Etfdh PE=1 SV=1
1104	802	Q921G7|ETFD_MOUSE	1.4	182.59	3990	3840	1	0.96	3990	3840	1	0.96	-	-	15	8	8	Carbamidomethylation; TMT6plex	68091	Electron transfer flavoprotein-ubiquinone oxidoreductase mitochondrial OS=Mus musculus GN=Etfdh PE=1 SV=1
783	1682	tr|G3UZM4|G3UZM4_MOUSE	3.32	182.51	14900	12900	1	0.87	14900	12900	1	0.87	-	-	30	9	8	Carbamidomethylation; TMT6plex	47346	Cell adhesion molecule 2 (Fragment) OS=Mus musculus GN=Cadm2 PE=1 SV=1
783	1683	Q8BLQ9|CADM2_MOUSE	3.32	182.51	14900	12900	1	0.87	14900	12900	1	0.87	-	-	30	9	8	Carbamidomethylation; TMT6plex	47559	Cell adhesion molecule 2 OS=Mus musculus GN=Cadm2 PE=1 SV=2
1024	1220	Q9JJK2|LANC2_MOUSE	4.53	182.5	3790	3130	1	0.83	3790	3130	1	0.83	-	-	22	7	7	Carbamidomethylation; TMT6plex; Deamidation (NQ)	50777	LanC-like protein 2 OS=Mus musculus GN=Lancl2 PE=1 SV=1
1024	1242	tr|F6RJV6|F6RJV6_MOUSE	4.53	182.5	3790	3130	1	0.83	3790	3130	1	0.83	-	-	23	7	7	Carbamidomethylation; TMT6plex; Deamidation (NQ)	49743	LanC-like protein 2 (Fragment) OS=Mus musculus GN=Lancl2 PE=1 SV=1
1084	1112	Q9D8E6|RL4_MOUSE	7.36	182.31	5410	3860	1	0.71	5410	3860	1	0.71	-	-	17	8	7	TMT6plex	47154	60S ribosomal protein L4 OS=Mus musculus GN=Rpl4 PE=1 SV=3
1915	2379	P85094|ISC2A_MOUSE	1.99	182.2	1700	1770	1	1.04	1700	1770	1	1.04	-	-	29	4	3	Carbamidomethylation; TMT6plex	22417	Isochorismatase domain-containing protein 2A OS=Mus musculus GN=Isoc2a PE=1 SV=1
684	1926	P62746|RHOB_MOUSE	1.56	181.85	21900	19800	1	0.91	21900	19800	1	0.91	-	-	26	6	5	Carbamidomethylation; TMT6plex	22123	Rho-related GTP-binding protein RhoB OS=Mus musculus GN=Rhob PE=1 SV=1
514	875	Q93092|TALDO_MOUSE	1.03	181.76	25500	26500	1	1.04	25500	26500	1	1.04	-	-	31	14	12	Carbamidomethylation; TMT6plex; Deamidation (NQ)	37387	Transaldolase OS=Mus musculus GN=Taldo1 PE=1 SV=2
514	878	tr|A0A1B0GR11|A0A1B0GR11_MOUSE	1.03	181.76	25500	26500	1	1.04	25500	26500	1	1.04	-	-	27	14	12	Carbamidomethylation; TMT6plex; Deamidation (NQ)	42151	Transaldolase OS=Mus musculus GN=Taldo1 PE=1 SV=1
921	863	Q8BHN3|GANAB_MOUSE	3.79	181.71	7040	7100	1	1.01	7040	7100	1	1.01	-	-	15	13	12	Carbamidomethylation; TMT6plex	106911	Neutral alpha-glucosidase AB OS=Mus musculus GN=Ganab PE=1 SV=1
1684	1056	tr|E9QMC2|E9QMC2_MOUSE	3.17	181.3	1400	1140	1	0.82	1400	1140	1	0.82	-	-	5	5	4	Carbamidomethylation; TMT6plex	128270	Metabotropic glutamate receptor 5 OS=Mus musculus GN=Grm5 PE=1 SV=1
1684	1059	Q3UVX5|GRM5_MOUSE	3.17	181.3	1400	1140	1	0.82	1400	1140	1	0.82	-	-	4	5	4	Carbamidomethylation; TMT6plex	131865	Metabotropic glutamate receptor 5 OS=Mus musculus GN=Grm5 PE=1 SV=2
1344	1864	Q9Z0P5|TWF2_MOUSE	2.5	181.26	2620	2580	1	0.98	2620	2580	1	0.98	-	-	14	5	4	Carbamidomethylation; TMT6plex	39471	Twinfilin-2 OS=Mus musculus GN=Twf2 PE=1 SV=1
1214	1191	Q8CC35|SYNPO_MOUSE	4.35	181.25	5230	3990	1	0.76	5230	3990	1	0.76	-	-	10	8	7	TMT6plex	99552	Synaptopodin OS=Mus musculus GN=Synpo PE=1 SV=2
857	1558	P62827|RAN_MOUSE	3.58	181.24	10300	10500	1	1.02	10300	10500	1	1.02	-	-	16	7	3	TMT6plex	24423	GTP-binding nuclear protein Ran OS=Mus musculus GN=Ran PE=1 SV=3
1058	950	Q9WU78|PDC6I_MOUSE	1.91	181.24	8500	8630	1	1.02	8500	8630	1	1.02	-	-	19	17	15	Carbamidomethylation; TMT6plex	96024	Programmed cell death 6-interacting protein OS=Mus musculus GN=Pdcd6ip PE=1 SV=3
1517	1088	Q8BG32|PSD11_MOUSE	2.63	181.21	6400	5600	1	0.88	6400	5600	1	0.88	-	-	30	11	11	Carbamidomethylation; TMT6plex	47437	26S proteasome non-ATPase regulatory subunit 11 OS=Mus musculus GN=Psmd11 PE=1 SV=3
1113	1418	tr|A0A087WPL5|A0A087WPL5_MOUSE	5.61	181.08	3610	2500	1	0.69	3610	2500	1	0.69	-	-	2	5	5	TMT6plex	149618	ATP-dependent RNA helicase A OS=Mus musculus GN=Dhx9 PE=1 SV=1
1113	1419	tr|E9QNN1|E9QNN1_MOUSE	5.61	181.08	3610	2500	1	0.69	3610	2500	1	0.69	-	-	2	5	5	TMT6plex	149689	ATP-dependent RNA helicase A OS=Mus musculus GN=Dhx9 PE=1 SV=1
806	1118	tr|D3Z3M7|D3Z3M7_MOUSE	2.3	180.91	2250	2190	1	0.97	2250	2190	1	0.97	-	-	5	11	6	TMT6plex	148003	CAP-Gly domain-containing linker protein 1 OS=Mus musculus GN=Clip1 PE=1 SV=1
806	1122	tr|D3Z2Z1|D3Z2Z1_MOUSE	2.3	180.91	2250	2190	1	0.97	2250	2190	1	0.97	-	-	4	11	6	TMT6plex	160010	CAP-Gly domain-containing linker protein 1 OS=Mus musculus GN=Clip1 PE=1 SV=1
806	1123	tr|F8WIA1|F8WIA1_MOUSE	2.3	180.91	2250	2190	1	0.97	2250	2190	1	0.97	-	-	4	11	6	TMT6plex	161235	CAP-Gly domain-containing linker protein 1 OS=Mus musculus GN=Clip1 PE=1 SV=1
735	1272	tr|B1AWV9|B1AWV9_MOUSE	2.56	180.85	317	361.765	1	1.14	317	361.765	1	1.14	-	-	1	6	1	TMT6plex	124611	Anion exchange protein OS=Mus musculus GN=Slc4a10 PE=1 SV=1
735	1274	Q5DTL9|S4A10_MOUSE	2.56	180.85	317	361.765	1	1.14	317	361.765	1	1.14	-	-	1	6	1	TMT6plex	125817	Sodium-driven chloride bicarbonate exchanger OS=Mus musculus GN=Slc4a10 PE=1 SV=2
1558	1465	Q8VCW8|ACSF2_MOUSE	1.18	180.84	3720	4020	1	1.08	3720	4020	1	1.08	-	-	14	9	8	Carbamidomethylation; TMT6plex	67951	Acyl-CoA synthetase family member 2 mitochondrial OS=Mus musculus GN=Acsf2 PE=1 SV=1
981	1562	P61021|RAB5B_MOUSE	1.69	180.74	2280	2480	1	1.09	2280	2480	1	1.09	-	-	14	9	3	TMT6plex	23707	Ras-related protein Rab-5B OS=Mus musculus GN=Rab5b PE=1 SV=1
1792	1621	Q8VEH5|EPMIP_MOUSE	1.2	180.73	1070	1070	1	1	1070	1070	1	1	-	-	5	5	2	Carbamidomethylation; TMT6plex	70096	EPM2A-interacting protein 1 OS=Mus musculus GN=Epm2aip1 PE=1 SV=1
1023	953	tr|S4R1I3|S4R1I3_MOUSE	1.87	180.57	4140	3900	1	0.94	4140	3900	1	0.94	-	-	10	8	6	TMT6plex	70990	Xaa-Pro aminopeptidase 1 OS=Mus musculus GN=Xpnpep1 PE=1 SV=1
1023	954	Q6P1B1|XPP1_MOUSE	1.87	180.57	4140	3900	1	0.94	4140	3900	1	0.94	-	-	10	8	6	TMT6plex	69591	Xaa-Pro aminopeptidase 1 OS=Mus musculus GN=Xpnpep1 PE=1 SV=1
1023	959	tr|Q3UE92|Q3UE92_MOUSE	1.87	180.57	4140	3900	1	0.94	4140	3900	1	0.94	-	-	9	8	6	TMT6plex	74560	Putative uncharacterized protein OS=Mus musculus GN=Xpnpep1 PE=1 SV=1
768	1378	P05132|KAPCA_MOUSE	14.39	180.57	2690	2420	1	0.9	2690	2420	1	0.9	-	-	12	14	4	TMT6plex	40571	cAMP-dependent protein kinase catalytic subunit alpha OS=Mus musculus GN=Prkaca PE=1 SV=3
849	1179	Q61792|LASP1_MOUSE	4.41	180.52	15200	11700	1	0.77	15200	11700	1	0.77	-	-	25	7	7	Carbamidomethylation; TMT6plex	29994	LIM and SH3 domain protein 1 OS=Mus musculus GN=Lasp1 PE=1 SV=1
1027	1585	tr|E0CY16|E0CY16_MOUSE	2.89	180.5	570	766.512	1	1.34	570	766.512	1	1.34	-	-	3	7	1	TMT6plex	42892	Cell adhesion molecule 1 OS=Mus musculus GN=Cadm1 PE=1 SV=1
1328	1275	Q8BNW9|KBTBB_MOUSE	1.05	180.49	1920	2100	1	1.09	1920	2100	1	1.09	-	-	9	6	5	Carbamidomethylation; TMT6plex	67946	Kelch repeat and BTB domain-containing protein 11 OS=Mus musculus GN=Kbtbd11 PE=1 SV=3
1521	967	Q9CX34|SGT1_MOUSE	1.91	180.48	4730	4420	1	0.93	4730	4420	1	0.93	-	-	30	10	9	Carbamidomethylation; TMT6plex	38159	Protein SGT1 homolog OS=Mus musculus GN=Sugt1 PE=1 SV=3
887	1049	tr|A0A0J9YU62|A0A0J9YU62_MOUSE	1.53	180.46	3670	3360	1	0.92	3670	3360	1	0.92	-	-	20	10	8	Carbamidomethylation; TMT6plex	46527	C-terminal-binding protein 1 OS=Mus musculus GN=Ctbp1 PE=1 SV=1
887	1055	O88712|CTBP1_MOUSE	1.53	180.46	3670	3360	1	0.92	3670	3360	1	0.92	-	-	20	10	8	Carbamidomethylation; TMT6plex	47745	C-terminal-binding protein 1 OS=Mus musculus GN=Ctbp1 PE=1 SV=2
1793	1748	tr|J3QMM7|J3QMM7_MOUSE	0.79	180.43	4300	4350	1	1.01	4300	4350	1	1.01	-	-	28	7	7	Carbamidomethylation; TMT6plex	35169	ATP-dependent (S)-NAD(P)H-hydrate dehydratase OS=Mus musculus GN=Naxd PE=1 SV=1
1793	1749	tr|K3W4M4|K3W4M4_MOUSE	0.79	180.43	4300	4350	1	1.01	4300	4350	1	1.01	-	-	25	7	7	Carbamidomethylation; TMT6plex	38912	ATP-dependent (S)-NAD(P)H-hydrate dehydratase OS=Mus musculus GN=Naxd PE=1 SV=1
1793	1750	Q9CZ42|NNRD_MOUSE	0.79	180.43	4300	4350	1	1.01	4300	4350	1	1.01	-	-	27	7	7	Carbamidomethylation; TMT6plex	36717	ATP-dependent (S)-NAD(P)H-hydrate dehydratase OS=Mus musculus GN=Naxd PE=1 SV=1
787	3058	tr|A0A1L1SUX8|A0A1L1SUX8_MOUSE	22.92	180.32	20100	17800	1	0.89	20100	17800	1	0.89	-	-	46	5	5	Carbamidomethylation; TMT6plex; Deamidation (NQ)	14038	Thy-1 membrane glycoprotein (Fragment) OS=Mus musculus GN=Thy1 PE=1 SV=1
787	3063	P01831|THY1_MOUSE	22.92	180.32	20100	17800	1	0.89	20100	17800	1	0.89	-	-	35	5	5	Carbamidomethylation; TMT6plex; Deamidation (NQ)	18080	Thy-1 membrane glycoprotein OS=Mus musculus GN=Thy1 PE=1 SV=1
1642	1972	tr|F2Z456|F2Z456_MOUSE	2.59	180.26	5140	4570	1	0.89	5140	4570	1	0.89	-	-	19	7	5	Carbamidomethylation; TMT6plex	34929	NADH-cytochrome b5 reductase OS=Mus musculus GN=Cyb5r3 PE=1 SV=1
1264	894	Q64516|GLPK_MOUSE	1.52	180.12	2060	1880	1	0.91	2060	1880	1	0.91	-	-	9	7	4	TMT6plex	61228	Glycerol kinase OS=Mus musculus GN=Gk PE=1 SV=2
986	2084	O88485|DC1I1_MOUSE	4.24	180.1	2250	1840	1	0.82	2250	1840	1	0.82	-	-	3	7	2	TMT6plex	70725	Cytoplasmic dynein 1 intermediate chain 1 OS=Mus musculus GN=Dync1i1 PE=1 SV=2
986	2088	tr|D3Z0M6|D3Z0M6_MOUSE	4.24	180.1	2250	1840	1	0.82	2250	1840	1	0.82	-	-	2	7	2	TMT6plex	72890	Cytoplasmic dynein 1 intermediate chain 1 OS=Mus musculus GN=Dync1i1 PE=1 SV=1
685	2665	P34884|MIF_MOUSE	0.91	180.05	21500	22600	1	1.05	21500	22600	1	1.05	-	-	56	5	5	Carbamidomethylation; TMT6plex	12504	Macrophage migration inhibitory factor OS=Mus musculus GN=Mif PE=1 SV=2
877	1329	Q9ERK4|XPO2_MOUSE	3.78	179.77	1480	1370	1	0.93	1480	1370	1	0.93	-	-	7	8	5	TMT6plex	110455	Exportin-2 OS=Mus musculus GN=Cse1l PE=1 SV=1
1652	1255	Q62443|NPTX1_MOUSE	1.2	179.75	4670	4250	1	0.91	4670	4250	1	0.91	-	-	16	7	6	Carbamidomethylation; TMT6plex	47117	Neuronal pentraxin-1 OS=Mus musculus GN=Nptx1 PE=1 SV=1
1061	1000	A2ALS5|RPGP1_MOUSE	3.13	179.38	2650	2560	1	0.97	2650	2560	1	0.97	-	-	8	8	6	Carbamidomethylation; TMT6plex	73433	Rap1 GTPase-activating protein 1 OS=Mus musculus GN=Rap1gap PE=1 SV=2
955	1011	Q99PU5|ACBG1_MOUSE	2.93	179.37	7970	6900	1	0.87	7970	6900	1	0.87	-	-	14	11	10	TMT6plex	80426	Long-chain-fatty-acid--CoA ligase ACSBG1 OS=Mus musculus GN=Acsbg1 PE=1 SV=1
1806	1700	Q64133|AOFA_MOUSE	4.29	179.3	2420	1960	1	0.81	2420	1960	1	0.81	-	-	10	7	5	TMT6plex	59602	Amine oxidase [flavin-containing] A OS=Mus musculus GN=Maoa PE=1 SV=3
1424	1618	Q9CPW0|CNTP2_MOUSE	0.66	179.19	2700	2650	1	0.98	2700	2650	1	0.98	-	-	1	4	1	TMT6plex	148197	Contactin-associated protein-like 2 OS=Mus musculus GN=Cntnap2 PE=1 SV=2
1424	1619	tr|E9QNF7|E9QNF7_MOUSE	0.66	179.19	2700	2650	1	0.98	2700	2650	1	0.98	-	-	1	4	1	TMT6plex	148250	Contactin-associated protein-like 2 OS=Mus musculus GN=Cntnap2 PE=1 SV=1
1030	1975	Q9D1K2|VATF_MOUSE	2.99	179.08	8500	6930	1	0.81	8500	6930	1	0.81	-	-	63	8	8	TMT6plex	13370	V-type proton ATPase subunit F OS=Mus musculus GN=Atp6v1f PE=1 SV=2
869	1052	Q6P5F9|XPO1_MOUSE	1.76	179.08	3880	3380	1	0.87	3880	3380	1	0.87	-	-	8	13	8	TMT6plex	123093	Exportin-1 OS=Mus musculus GN=Xpo1 PE=1 SV=1
1496	1342	P30416|FKBP4_MOUSE	2.04	178.94	3040	2570	1	0.84	3040	2570	1	0.84	-	-	8	5	4	Carbamidomethylation; TMT6plex	51572	Peptidyl-prolyl cis-trans isomerase FKBP4 OS=Mus musculus GN=Fkbp4 PE=1 SV=5
1265	1402	P16460|ASSY_MOUSE	2.1	178.71	5650	6160	1	1.09	5650	6160	1	1.09	-	-	15	6	6	Carbamidomethylation; TMT6plex	46585	Argininosuccinate synthase OS=Mus musculus GN=Ass1 PE=1 SV=1
314	1936	Q64433|CH10_MOUSE	3.38	178.52	131000	109000	1	0.83	131000	109000	1	0.83	-	-	67	9	9	TMT6plex; Oxidation (M)	10963	10 kDa heat shock protein mitochondrial OS=Mus musculus GN=Hspe1 PE=1 SV=2
1123	1048	P12023|A4_MOUSE	1.72	178.5	3090	3060	1	0.99	3090	3060	1	0.99	-	-	12	8	7	Carbamidomethylation; TMT6plex	86722	Amyloid beta A4 protein OS=Mus musculus GN=App PE=1 SV=3
1097	1461	Q8R164|BPHL_MOUSE	1.05	178.39	5890	6250	1	1.06	5890	6250	1	1.06	-	-	32	11	8	Carbamidomethylation; TMT6plex; Oxidation (M)	32851	Valacyclovir hydrolase OS=Mus musculus GN=Bphl PE=1 SV=1
1349	1262	tr|Q8C413|Q8C413_MOUSE	2.66	178.33	2410	2670	1	1.1	2410	2670	1	1.1	-	-	9	8	6	TMT6plex	83972	Diacylglycerol kinase OS=Mus musculus GN=Dgkg PE=1 SV=1
1349	1267	Q91WG7|DGKG_MOUSE	2.66	178.33	2410	2670	1	1.1	2410	2670	1	1.1	-	-	8	8	6	TMT6plex	88523	Diacylglycerol kinase gamma OS=Mus musculus GN=Dgkg PE=1 SV=1
165	2406	tr|Q91WH7|Q91WH7_MOUSE	1.14	178.2	4270	4080	1	0.95	4270	4080	1	0.95	-	-	3	12	2	Carbamidomethylation; TMT6plex; Deamidation (NQ)	113037	Sodium/potassium-transporting ATPase subunit alpha OS=Mus musculus GN=Atp4a PE=1 SV=1
165	2409	Q64436|ATP4A_MOUSE	1.14	178.2	4270	4080	1	0.95	4270	4080	1	0.95	-	-	3	12	2	Carbamidomethylation; TMT6plex; Deamidation (NQ)	114016	Potassium-transporting ATPase alpha chain 1 OS=Mus musculus GN=Atp4a PE=1 SV=3
165	2410	tr|E9QNX7|E9QNX7_MOUSE	1.14	178.2	4270	4080	1	0.95	4270	4080	1	0.95	-	-	3	12	2	Carbamidomethylation; TMT6plex; Deamidation (NQ)	114065	Sodium/potassium-transporting ATPase subunit alpha OS=Mus musculus GN=Atp4a PE=1 SV=1
1122	1004	Q8C419|GP158_MOUSE	2	178.19	2400	2190	1	0.91	2400	2190	1	0.91	-	-	7	8	7	Carbamidomethylation; TMT6plex; Deamidation (NQ)	134426	Probable G-protein coupled receptor 158 OS=Mus musculus GN=Gpr158 PE=1 SV=2
1138	1429	Q9QUM9|PSA6_MOUSE	1.66	178.15	7570	6960	1	0.92	7570	6960	1	0.92	-	-	35	8	8	Carbamidomethylation; TMT6plex	27372	Proteasome subunit alpha type-6 OS=Mus musculus GN=Psma6 PE=1 SV=1
1502	1090	Q9WUA2|SYFB_MOUSE	0.86	178.06	4010	4160	1	1.04	4010	4160	1	1.04	-	-	16	11	9	TMT6plex; Deamidation (NQ)	65697	Phenylalanine--tRNA ligase beta subunit OS=Mus musculus GN=Farsb PE=1 SV=2
949	1009	Q3U0V1|FUBP2_MOUSE	1.57	177.92	2680	2880	1	1.07	2680	2880	1	1.07	-	-	6	9	4	TMT6plex	76776	Far upstream element-binding protein 2 OS=Mus musculus GN=Khsrp PE=1 SV=2
833	899	P50247|SAHH_MOUSE	0.71	177.88	9960	9990	1	1	9960	9990	1	1	-	-	32	16	13	Carbamidomethylation; TMT6plex; Deamidation (NQ)	47688	Adenosylhomocysteinase OS=Mus musculus GN=Ahcy PE=1 SV=3
1172	1937	Q99020|ROAA_MOUSE	3.04	177.87	1830	1860	1	1.02	1830	1860	1	1.02	-	-	8	4	2	TMT6plex	30831	Heterogeneous nuclear ribonucleoprotein A/B OS=Mus musculus GN=Hnrnpab PE=1 SV=1
1172	1966	tr|Q20BD0|Q20BD0_MOUSE	3.04	177.87	1830	1860	1	1.02	1830	1860	1	1.02	-	-	7	4	2	TMT6plex	36211	Heterogeneous nuclear ribonucleoprotein A/B OS=Mus musculus GN=Hnrnpab PE=1 SV=1
1172	1970	tr|Q80XR6|Q80XR6_MOUSE	3.04	177.87	1830	1860	1	1.02	1830	1860	1	1.02	-	-	7	4	2	TMT6plex	33816	Heterogeneous nuclear ribonucleoprotein A/B OS=Mus musculus GN=Hnrnpab PE=1 SV=1
917	998	P14733|LMNB1_MOUSE	4.6	177.8	3560	2640	1	0.74	3560	2640	1	0.74	-	-	11	10	7	TMT6plex	66786	Lamin-B1 OS=Mus musculus GN=Lmnb1 PE=1 SV=3
1741	1836	P55302|AMRP_MOUSE	3.91	177.69	3860	3090	1	0.8	3860	3090	1	0.8	-	-	9	4	4	TMT6plex	42215	Alpha-2-macroglobulin receptor-associated protein OS=Mus musculus GN=Lrpap1 PE=1 SV=1
530	2610	Q9JJV2|PROF2_MOUSE	7.24	177.38	34200	34500	1	1.01	34200	34500	1	1.01	-	-	35	5	5	TMT6plex; Oxidation (M); Deamidation (NQ)	15032	Profilin-2 OS=Mus musculus GN=Pfn2 PE=1 SV=3
440	1097	tr|F8WID5|F8WID5_MOUSE	2.51	177.38	1180	1180	1	1	1180	1180	1	1	-	-	6	15	2	TMT6plex	37413	Tropomyosin alpha-1 chain OS=Mus musculus GN=Tpm1 PE=1 SV=1
1268	1800	tr|Q8BH80|Q8BH80_MOUSE	0.72	177.33	9890	9340	1	0.94	9890	9340	1	0.94	-	-	33	9	8	Carbamidomethylation; TMT6plex	26918	Putative uncharacterized protein OS=Mus musculus GN=Vapb PE=1 SV=1
1268	1809	Q9QY76|VAPB_MOUSE	0.72	177.33	9890	9340	1	0.94	9890	9340	1	0.94	-	-	33	9	8	Carbamidomethylation; TMT6plex	26946	Vesicle-associated membrane protein-associated protein B OS=Mus musculus GN=Vapb PE=1 SV=3
1179	1138	Q00623|APOA1_MOUSE	4.46	177.21	4790	5790	1	1.21	4790	5790	1	1.21	-	-	31	13	10	TMT6plex	30616	Apolipoprotein A-I OS=Mus musculus GN=Apoa1 PE=1 SV=2
1388	1565	P35278|RAB5C_MOUSE	3.77	177.18	2020	1760	1	0.87	2020	1760	1	0.87	-	-	13	8	2	TMT6plex	23412	Ras-related protein Rab-5C OS=Mus musculus GN=Rab5c PE=1 SV=2
975	1152	Q61656|DDX5_MOUSE	2.74	177.09	2720	2230	1	0.82	2720	2230	1	0.82	-	-	7	10	5	TMT6plex	69290	Probable ATP-dependent RNA helicase DDX5 OS=Mus musculus GN=Ddx5 PE=1 SV=2
975	1153	tr|Q8BTS0|Q8BTS0_MOUSE	2.74	177.09	2720	2230	1	0.82	2720	2230	1	0.82	-	-	7	10	5	TMT6plex	69266	DEAD (Asp-Glu-Ala-Asp) box polypeptide 5 OS=Mus musculus GN=Ddx5 PE=1 SV=1
950	1757	Q8JZS0|LIN7A_MOUSE	1.59	176.9	4150	3890	1	0.94	4150	3890	1	0.94	-	-	22	13	6	Carbamidomethylation; TMT6plex; Oxidation (M)	25993	Protein lin-7 homolog A OS=Mus musculus GN=Lin7a PE=1 SV=2
1578	2295	tr|F6QKK2|F6QKK2_MOUSE	3.38	176.81	741	783.824	1	1.06	741	783.824	1	1.06	-	-	8	8	2	TMT6plex	18875	ADP-ribosylation factor-like protein 8A (Fragment) OS=Mus musculus GN=Arl8a PE=1 SV=1
1578	2297	Q8VEH3|ARL8A_MOUSE	3.38	176.81	741	783.824	1	1.06	741	783.824	1	1.06	-	-	8	8	2	TMT6plex	21390	ADP-ribosylation factor-like protein 8A OS=Mus musculus GN=Arl8a PE=1 SV=1
911	906	Q62167|DDX3X_MOUSE	5.48	176.74	1040	962.318	1	0.93	1040	962.318	1	0.93	-	-	5	7	3	TMT6plex	73102	ATP-dependent RNA helicase DDX3X OS=Mus musculus GN=Ddx3x PE=1 SV=3
798	1341	Q62419|SH3G1_MOUSE	2.17	176.69	1790	1890	1	1.05	1790	1890	1	1.05	-	-	15	10	5	Carbamidomethylation; TMT6plex; Oxidation (M)	41518	Endophilin-A2 OS=Mus musculus GN=Sh3gl1 PE=1 SV=1
845	990	Q9CS84|NRX1A_MOUSE	4.5	176.63	2380	1760	1	0.74	2380	1760	1	0.74	-	-	4	13	5	TMT6plex; Deamidation (NQ)	166168	Neurexin-1 OS=Mus musculus GN=Nrxn1 PE=1 SV=3
845	992	tr|E0CY11|E0CY11_MOUSE	4.5	176.63	2380	1760	1	0.74	2380	1760	1	0.74	-	-	4	13	5	TMT6plex; Deamidation (NQ)	164195	Neurexin-1 OS=Mus musculus GN=Nrxn1 PE=1 SV=2
397	1394	tr|A0A0R4J2C2|A0A0R4J2C2_MOUSE	1.55	176.63	874	895.457	1	1.02	874	895.457	1	1.02	-	-	4	10	2	Carbamidomethylation; TMT6plex	47249	Synaptotagmin II OS=Mus musculus GN=Syt2 PE=1 SV=1
1997	1431	O88543|CSN3_MOUSE	2.12	176.46	1020	967.691	1	0.95	1020	967.691	1	0.95	-	-	10	5	3	Carbamidomethylation; TMT6plex	47832	COP9 signalosome complex subunit 3 OS=Mus musculus GN=Cops3 PE=1 SV=3
1131	1629	O70325|GPX41_MOUSE	1.71	176.4	3830	4150	1	1.08	3830	4150	1	1.08	-	-	29	8	6	Carbamidomethylation; TMT6plex; Oxidation (M); Deamidation (NQ)	22229	Phospholipid hydroperoxide glutathione peroxidase mitochondrial OS=Mus musculus GN=Gpx4 PE=1 SV=4
1131	1654	tr|F7A8H6|F7A8H6_MOUSE	1.71	176.4	3830	4150	1	1.08	3830	4150	1	1.08	-	-	23	8	6	Carbamidomethylation; TMT6plex; Oxidation (M); Deamidation (NQ)	29147	Glutathione peroxidase OS=Mus musculus GN=Gpx4 PE=1 SV=1
1131	1662	Q91XR9|GPX42_MOUSE	1.71	176.4	3830	4150	1	1.08	3830	4150	1	1.08	-	-	23	8	6	Carbamidomethylation; TMT6plex; Oxidation (M); Deamidation (NQ)	29252	Phospholipid hydroperoxide glutathione peroxidase nuclear OS=Mus musculus GN=Gpx4 PE=1 SV=3
1062	3149	P99027|RLA2_MOUSE	3	176.38	10400	8680	1	0.84	10400	8680	1	0.84	-	-	77	5	5	TMT6plex; Deamidation (NQ)	11651	60S acidic ribosomal protein P2 OS=Mus musculus GN=Rplp2 PE=1 SV=3
1446	1848	Q921F2|TADBP_MOUSE	1.16	176.33	4250	4150	1	0.98	4250	4150	1	0.98	-	-	20	7	6	Carbamidomethylation; TMT6plex	44548	TAR DNA-binding protein 43 OS=Mus musculus GN=Tardbp PE=1 SV=1
795	1340	tr|A2A6U3|A2A6U3_MOUSE	2.04	176.3	7470	7030	1	0.94	7470	7030	1	0.94	-	-	14	11	7	TMT6plex	63773	Septin-9 OS=Mus musculus GN=Sept9 PE=1 SV=1
795	1344	Q80UG5|SEPT9_MOUSE	2.04	176.3	7470	7030	1	0.94	7470	7030	1	0.94	-	-	13	11	7	TMT6plex	65575	Septin-9 OS=Mus musculus GN=Sept9 PE=1 SV=1
1443	1641	P97379|G3BP2_MOUSE	2.84	176.18	2300	2130	1	0.93	2300	2130	1	0.93	-	-	10	6	5	TMT6plex	54088	Ras GTPase-activating protein-binding protein 2 OS=Mus musculus GN=G3bp2 PE=1 SV=2
939	1012	tr|S4R255|S4R255_MOUSE	2.34	176.05	1820	1540	1	0.85	1820	1540	1	0.85	-	-	3	7	4	Carbamidomethylation; TMT6plex	160051	Nitric oxide synthase OS=Mus musculus GN=Nos1 PE=1 SV=1
939	1013	Q9Z0J4|NOS1_MOUSE	2.34	176.05	1820	1540	1	0.85	1820	1540	1	0.85	-	-	3	7	4	Carbamidomethylation; TMT6plex	160472	Nitric oxide synthase brain OS=Mus musculus GN=Nos1 PE=1 SV=1
939	1015	tr|F8WGF2|F8WGF2_MOUSE	2.34	176.05	1820	1540	1	0.85	1820	1540	1	0.85	-	-	3	7	4	Carbamidomethylation; TMT6plex	164314	Nitric oxide synthase brain OS=Mus musculus GN=Nos1 PE=1 SV=1
1303	1650	O88531|PPT1_MOUSE	6.24	175.97	4100	4800	1	1.17	4100	4800	1	1.17	-	-	20	8	5	TMT6plex	34490	Palmitoyl-protein thioesterase 1 OS=Mus musculus GN=Ppt1 PE=1 SV=2
1035	1357	tr|E9Q1X8|E9Q1X8_MOUSE	2	175.94	4620	3920	1	0.85	4620	3920	1	0.85	-	-	5	8	6	TMT6plex	123206	Voltage-dependent calcium channel subunit alpha-2/delta-1 OS=Mus musculus GN=Cacna2d1 PE=1 SV=2
1035	1360	O08532|CA2D1_MOUSE	2	175.94	4620	3920	1	0.85	4620	3920	1	0.85	-	-	5	8	6	TMT6plex	124630	Voltage-dependent calcium channel subunit alpha-2/delta-1 OS=Mus musculus GN=Cacna2d1 PE=1 SV=1
928	1642	Q78ZA7|NP1L4_MOUSE	0.76	175.9	2780	2690	1	0.97	2780	2690	1	0.97	-	-	10	4	3	TMT6plex	42679	Nucleosome assembly protein 1-like 4 OS=Mus musculus GN=Nap1l4 PE=1 SV=1
928	1643	tr|B7ZNL2|B7ZNL2_MOUSE	0.76	175.9	2780	2690	1	0.97	2780	2690	1	0.97	-	-	10	4	3	TMT6plex	43935	Nap1l4 protein OS=Mus musculus GN=Nap1l4 PE=1 SV=1
1576	1470	P47911|RL6_MOUSE	7.79	175.86	6690	4390	1	0.66	6690	4390	1	0.66	-	-	22	8	7	TMT6plex; Deamidation (NQ)	33510	60S ribosomal protein L6 OS=Mus musculus GN=Rpl6 PE=1 SV=3
1260	1101	Q03517|SCG2_MOUSE	3.44	175.82	7240	6020	1	0.83	7240	6020	1	0.83	-	-	11	9	6	TMT6plex	70644	Secretogranin-2 OS=Mus musculus GN=Scg2 PE=1 SV=1
2247	1474	Q8CBY8|DCTN4_MOUSE	0.94	175.81	1430	1360	1	0.95	1430	1360	1	0.95	-	-	8	4	4	TMT6plex	53057	Dynactin subunit 4 OS=Mus musculus GN=Dctn4 PE=1 SV=1
1290	2215	P14206|RSSA_MOUSE	1.58	175.78	3850	3430	1	0.89	3850	3430	1	0.89	-	-	22	7	5	Carbamidomethylation; TMT6plex	32838	40S ribosomal protein SA OS=Mus musculus GN=Rpsa PE=1 SV=4
1386	1182	Q9CZD3|GARS_MOUSE	1.27	175.68	3830	3880	1	1.01	3830	3880	1	1.01	-	-	11	10	8	TMT6plex	81878	Glycine--tRNA ligase OS=Mus musculus GN=Gars PE=1 SV=1
565	2593	P54227|STMN1_MOUSE	6.36	175.66	27600	23900	1	0.87	27600	23900	1	0.87	-	-	46	9	9	TMT6plex; Deamidation (NQ)	17274	Stathmin OS=Mus musculus GN=Stmn1 PE=1 SV=2
1460	2165	tr|J3QP71|J3QP71_MOUSE	3.29	175.65	1300	1400	1	1.08	1300	1400	1	1.08	-	-	8	8	3	TMT6plex	21721	Basigin (Fragment) OS=Mus musculus GN=Bsg PE=1 SV=1
1469	2464	Q9CQW2|ARL8B_MOUSE	2.12	175.51	2220	1980	1	0.89	2220	1980	1	0.89	-	-	5	9	2	TMT6plex	21539	ADP-ribosylation factor-like protein 8B OS=Mus musculus GN=Arl8b PE=1 SV=1
1335	1201	tr|D3Z7E5|D3Z7E5_MOUSE	3.09	175.49	4910	3990	1	0.81	4910	3990	1	0.81	-	-	25	12	9	Carbamidomethylation; TMT6plex	51246	Glycogen synthase kinase-3 alpha OS=Mus musculus GN=Gsk3a PE=1 SV=1
1335	1202	Q2NL51|GSK3A_MOUSE	3.09	175.49	4910	3990	1	0.81	4910	3990	1	0.81	-	-	25	12	9	Carbamidomethylation; TMT6plex	51661	Glycogen synthase kinase-3 alpha OS=Mus musculus GN=Gsk3a PE=1 SV=2
1537	2486	Q9CQZ5|NDUA6_MOUSE	8.24	175.46	7520	10600	1	1.41	7520	10600	1	1.41	-	-	51	8	7	TMT6plex	15283	NADH dehydrogenase [ubiquinone] 1 alpha subcomplex subunit 6 OS=Mus musculus GN=Ndufa6 PE=1 SV=1
1721	1425	O08914|FAAH1_MOUSE	1.8	174.85	3740	3280	1	0.88	3740	3280	1	0.88	-	-	20	11	9	Carbamidomethylation; TMT6plex	63221	Fatty-acid amide hydrolase 1 OS=Mus musculus GN=Faah PE=1 SV=1
1099	2012	O88741|GDAP1_MOUSE	2.29	174.63	3350	2820	1	0.84	3350	2820	1	0.84	-	-	12	5	4	TMT6plex; Deamidation (NQ)	41311	Ganglioside-induced differentiation-associated protein 1 OS=Mus musculus GN=Gdap1 PE=1 SV=1
1728	1754	Q80VP1|EPN1_MOUSE	3.36	174.56	1400	1190	1	0.85	1400	1190	1	0.85	-	-	5	5	3	TMT6plex	60212	Epsin-1 OS=Mus musculus GN=Epn1 PE=1 SV=3
1107	1696	tr|D3Z645|D3Z645_MOUSE	1.9	174.42	7370	8230	1	1.12	7370	8230	1	1.12	-	-	45	7	6	Carbamidomethylation; TMT6plex	16138	Vacuolar protein sorting-associated protein 29 OS=Mus musculus GN=Vps29 PE=1 SV=1
1107	1697	Q9QZ88|VPS29_MOUSE	1.9	174.42	7370	8230	1	1.12	7370	8230	1	1.12	-	-	36	7	6	Carbamidomethylation; TMT6plex	20496	Vacuolar protein sorting-associated protein 29 OS=Mus musculus GN=Vps29 PE=1 SV=1
1185	2371	tr|A2BE93|A2BE93_MOUSE	4.45	174.34	5700	4640	1	0.81	5700	4640	1	0.81	-	-	21	5	4	TMT6plex	24924	Protein SET (Fragment) OS=Mus musculus GN=Set PE=1 SV=1
1185	2372	Q9EQU5|SET_MOUSE	4.45	174.34	5700	4640	1	0.81	5700	4640	1	0.81	-	-	16	5	4	TMT6plex	33378	Protein SET OS=Mus musculus GN=Set PE=1 SV=1
1132	2133	Q9CQJ8|NDUB9_MOUSE	0.21	174.33	5380	5490	1	1.02	5380	5490	1	1.02	-	-	12	4	3	Carbamidomethylation; TMT6plex; Oxidation (M)	21984	NADH dehydrogenase [ubiquinone] 1 beta subcomplex subunit 9 OS=Mus musculus GN=Ndufb9 PE=1 SV=3
301	1518	P61027|RAB10_MOUSE	2.85	174.25	12200	10200	1	0.84	12200	10200	1	0.84	-	-	20	10	4	TMT6plex	22541	Ras-related protein Rab-10 OS=Mus musculus GN=Rab10 PE=1 SV=1
712	1271	O88990|ACTN3_MOUSE	1.61	173.78	329	372.51	1	1.13	329	372.51	1	1.13	-	-	1	10	1	TMT6plex; Deamidation (NQ)	103043	Alpha-actinin-3 OS=Mus musculus GN=Actn3 PE=2 SV=1
1053	2275	Q9DCS9|NDUBA_MOUSE	5.31	173.6	6160	6930	1	1.13	6160	6930	1	1.13	-	-	39	7	6	Carbamidomethylation; TMT6plex	21024	NADH dehydrogenase [ubiquinone] 1 beta subcomplex subunit 10 OS=Mus musculus GN=Ndufb10 PE=1 SV=3
900	2566	Q9CPP6|NDUA5_MOUSE	2.98	173.41	8410	9380	1	1.12	8410	9380	1	1.12	-	-	42	7	4	Carbamidomethylation; TMT6plex	13360	NADH dehydrogenase [ubiquinone] 1 alpha subcomplex subunit 5 OS=Mus musculus GN=Ndufa5 PE=1 SV=3
744	1127	Q8JZQ2|AFG32_MOUSE	2.05	173.22	3560	3240	1	0.91	3560	3240	1	0.91	-	-	8	12	6	TMT6plex	89519	AFG3-like protein 2 OS=Mus musculus GN=Afg3l2 PE=1 SV=1
1455	2019	Q8BHZ0|FA49A_MOUSE	2.38	173.2	803	591.599	1	0.74	803	591.599	1	0.74	-	-	4	4	1	TMT6plex	37343	Protein FAM49A OS=Mus musculus GN=Fam49a PE=1 SV=1
872	3527	Q9WTT4|VATG2_MOUSE	2.72	173.16	6530	5520	1	0.84	6530	5520	1	0.84	-	-	53	5	5	Carbamidomethylation; TMT6plex; Oxidation (M)	13651	V-type proton ATPase subunit G 2 OS=Mus musculus GN=Atp6v1g2 PE=1 SV=1
872	3559	tr|B0V2H4|B0V2H4_MOUSE	2.72	173.16	6530	5520	1	0.84	6530	5520	1	0.84	-	-	67	5	5	Carbamidomethylation; TMT6plex; Oxidation (M)	10887	V-type proton ATPase subunit G OS=Mus musculus GN=Atp6v1g2 PE=1 SV=1
1544	1808	Q8BGD9|IF4B_MOUSE	2.42	173.15	3630	3810	1	1.05	3630	3810	1	1.05	-	-	6	3	3	TMT6plex	68840	Eukaryotic translation initiation factor 4B OS=Mus musculus GN=Eif4b PE=1 SV=1
681	1247	P27601|GNA13_MOUSE	2.73	172.92	2650	2610	1	0.99	2650	2610	1	0.99	-	-	13	11	5	Carbamidomethylation; TMT6plex	44055	Guanine nucleotide-binding protein subunit alpha-13 OS=Mus musculus GN=Gna13 PE=1 SV=1
725	3109	P63028|TCTP_MOUSE	2.95	172.91	16900	16500	1	0.97	16900	16500	1	0.97	-	-	28	6	5	Carbamidomethylation; TMT6plex; Oxidation (M)	19462	Translationally-controlled tumor protein OS=Mus musculus GN=Tpt1 PE=1 SV=1
1470	1586	Q60737|CSK21_MOUSE	3.93	172.9	3480	2720	1	0.78	3480	2720	1	0.78	-	-	23	7	6	TMT6plex	45134	Casein kinase II subunit alpha OS=Mus musculus GN=Csnk2a1 PE=1 SV=2
1213	1666	Q80XI4|PI42B_MOUSE	17.75	172.83	3050	3160	1	1.04	3050	3160	1	1.04	-	-	7	8	2	TMT6plex	47319	Phosphatidylinositol 5-phosphate 4-kinase type-2 beta OS=Mus musculus GN=Pip4k2b PE=1 SV=1
1799	1526	Q9CQE8|CN166_MOUSE	1.59	172.77	1990	1860	1	0.93	1990	1860	1	0.93	-	-	15	4	4	TMT6plex	28152	UPF0568 protein C14orf166 homolog OS=Mus musculus PE=1 SV=1
1397	1906	tr|E9PYA3|E9PYA3_MOUSE	5.21	172.71	2320	1820	1	0.78	2320	1820	1	0.78	-	-	14	4	3	Carbamidomethylation; TMT6plex	26000	Hydroxyacylglutathione hydrolase mitochondrial (Fragment) OS=Mus musculus GN=Hagh PE=1 SV=1
1397	1916	Q99KB8|GLO2_MOUSE	5.21	172.71	2320	1820	1	0.78	2320	1820	1	0.78	-	-	11	4	3	Carbamidomethylation; TMT6plex	34084	Hydroxyacylglutathione hydrolase mitochondrial OS=Mus musculus GN=Hagh PE=1 SV=2
1397	1917	tr|G5E8T9|G5E8T9_MOUSE	5.21	172.71	2320	1820	1	0.78	2320	1820	1	0.78	-	-	11	4	3	Carbamidomethylation; TMT6plex	34103	Hydroxyacyl glutathione hydrolase OS=Mus musculus GN=Hagh PE=1 SV=1
1397	1961	tr|A0A0R4J052|A0A0R4J052_MOUSE	5.21	172.71	2320	1820	1	0.78	2320	1820	1	0.78	-	-	13	4	3	Carbamidomethylation; TMT6plex	28920	Hydroxyacylglutathione hydrolase mitochondrial OS=Mus musculus GN=Hagh PE=1 SV=1
1759	1451	tr|F8SLQ1|F8SLQ1_MOUSE	1.47	172.66	1480	1340	1	0.9	1480	1340	1	0.9	-	-	5	4	3	TMT6plex	72272	PEX5-related protein OS=Mus musculus GN=Pex5l PE=1 SV=1
1759	1455	Q8C437|PEX5R_MOUSE	1.47	172.66	1480	1340	1	0.9	1480	1340	1	0.9	-	-	6	4	3	TMT6plex	63135	PEX5-related protein OS=Mus musculus GN=Pex5l PE=1 SV=2
1759	1456	tr|F8SLP9|F8SLP9_MOUSE	1.47	172.66	1480	1340	1	0.9	1480	1340	1	0.9	-	-	6	4	3	TMT6plex	63139	PEX5-related protein OS=Mus musculus GN=Pex5l PE=1 SV=1
1759	1460	tr|D3YYH0|D3YYH0_MOUSE	1.47	172.66	1480	1340	1	0.9	1480	1340	1	0.9	-	-	6	4	3	TMT6plex	65836	PEX5-related protein OS=Mus musculus GN=Pex5l PE=1 SV=1
1759	1462	tr|F8SLQ3|F8SLQ3_MOUSE	1.47	172.66	1480	1340	1	0.9	1480	1340	1	0.9	-	-	5	4	3	TMT6plex	68532	PEX5-related protein OS=Mus musculus GN=Pex5l PE=1 SV=1
1524	1481	P49442|INPP_MOUSE	1.44	172.36	5660	5260	1	0.93	5660	5260	1	0.93	-	-	18	7	6	Carbamidomethylation; TMT6plex	43346	Inositol polyphosphate 1-phosphatase OS=Mus musculus GN=Inpp1 PE=1 SV=2
1301	1542	Q5FWK3|RHG01_MOUSE	0.64	172	2620	2510	1	0.96	2620	2510	1	0.96	-	-	6	5	3	TMT6plex	50411	Rho GTPase-activating protein 1 OS=Mus musculus GN=Arhgap1 PE=1 SV=1
1301	1544	tr|A2AH25|A2AH25_MOUSE	0.64	172	2620	2510	1	0.96	2620	2510	1	0.96	-	-	6	5	3	TMT6plex	54437	Rho GTPase-activating protein 1 OS=Mus musculus GN=Arhgap1 PE=1 SV=1
1573	2091	Q8C522|ENDD1_MOUSE	2.67	171.94	2160	2060	1	0.95	2160	2060	1	0.95	-	-	6	3	3	Carbamidomethylation; TMT6plex	55262	Endonuclease domain-containing 1 protein OS=Mus musculus GN=Endod1 PE=1 SV=2
2648	2348	Q9Z0H4|CELF2_MOUSE	1.07	171.93	266	253.116	1	0.95	266	253.116	1	0.95	-	-	3	4	1	Carbamidomethylation; TMT6plex	54271	CUGBP Elav-like family member 2 OS=Mus musculus GN=Celf2 PE=1 SV=1
1115	1560	tr|F8VQE9|F8VQE9_MOUSE	2.06	171.84	2900	2670	1	0.92	2900	2670	1	0.92	-	-	4	8	3	TMT6plex; Deamidation (NQ)	97695	Arf-GAP with GTPase ANK repeat and PH domain-containing protein 3 OS=Mus musculus GN=Agap3 PE=1 SV=1
1115	1561	Q8VHH5|AGAP3_MOUSE	2.06	171.84	2900	2670	1	0.92	2900	2670	1	0.92	-	-	4	8	3	TMT6plex; Deamidation (NQ)	97965	Arf-GAP with GTPase ANK repeat and PH domain-containing protein 3 OS=Mus musculus GN=Agap3 PE=1 SV=1
1384	2193	tr|A3KFU5|A3KFU5_MOUSE	3.93	171.75	811	536.677	1	0.66	811	536.677	1	0.66	-	-	1	6	1	TMT6plex	69430	Polyadenylate-binding protein OS=Mus musculus GN=Pabpc4 PE=1 SV=1
1384	2198	tr|Q91YZ8|Q91YZ8_MOUSE	3.93	171.75	811	536.677	1	0.66	811	536.677	1	0.66	-	-	1	6	1	TMT6plex	67853	Polyadenylate-binding protein OS=Mus musculus GN=Pabpc4 PE=1 SV=1
1384	2199	tr|D3Z5M2|D3Z5M2_MOUSE	3.93	171.75	811	536.677	1	0.66	811	536.677	1	0.66	-	-	1	6	1	TMT6plex	67759	Polyadenylate-binding protein OS=Mus musculus GN=Gm10110 PE=3 SV=1
1384	2200	tr|A3KFU8|A3KFU8_MOUSE	3.93	171.75	811	536.677	1	0.66	811	536.677	1	0.66	-	-	1	6	1	TMT6plex	70665	Polyadenylate-binding protein OS=Mus musculus GN=Pabpc4 PE=1 SV=1
1384	2201	tr|Q6PHQ9|Q6PHQ9_MOUSE	3.93	171.75	811	536.677	1	0.66	811	536.677	1	0.66	-	-	1	6	1	TMT6plex	72242	Polyadenylate-binding protein OS=Mus musculus GN=Pabpc4 PE=1 SV=1
1094	2122	O88952|LIN7C_MOUSE	2.4	171.74	1420	1530	1	1.08	1420	1530	1	1.08	-	-	15	10	3	Carbamidomethylation; TMT6plex	21834	Protein lin-7 homolog C OS=Mus musculus GN=Lin7c PE=1 SV=2
1396	1354	tr|Q3U367|Q3U367_MOUSE	1.53	171.65	4950	5200	1	1.05	4950	5200	1	1.05	-	-	15	8	7	Carbamidomethylation; TMT6plex	55888	4-trimethylaminobutyraldehyde dehydrogenase OS=Mus musculus GN=Aldh9a1 PE=1 SV=1
1396	1364	Q9JLJ2|AL9A1_MOUSE	1.53	171.65	4950	5200	1	1.05	4950	5200	1	1.05	-	-	16	8	7	Carbamidomethylation; TMT6plex	53515	4-trimethylaminobutyraldehyde dehydrogenase OS=Mus musculus GN=Aldh9a1 PE=1 SV=1
1283	1420	Q8C8N2|SCAI_MOUSE	1.72	171.36	735	660.251	1	0.9	735	660.251	1	0.9	-	-	3	3	2	TMT6plex	70275	Protein SCAI OS=Mus musculus GN=Scai PE=1 SV=2
959	1109	Q5SRX1|TM1L2_MOUSE	2.3	171.35	4540	3820	1	0.84	4540	3820	1	0.84	-	-	13	5	5	TMT6plex	55663	TOM1-like protein 2 OS=Mus musculus GN=Tom1l2 PE=1 SV=1
1559	1485	Q91Z53|GRHPR_MOUSE	1.7	171.23	4150	4550	1	1.1	4150	4550	1	1.1	-	-	21	7	6	Carbamidomethylation; TMT6plex	35329	Glyoxylate reductase/hydroxypyruvate reductase OS=Mus musculus GN=Grhpr PE=1 SV=1
1336	2429	tr|Q91YS7|Q91YS7_MOUSE	1.37	171.22	1030	1010	1	0.98	1030	1010	1	0.98	-	-	7	6	2	TMT6plex	44303	Dual-specificity mitogen-activated protein kinase kinase 2 OS=Mus musculus GN=Map2k2 PE=1 SV=1
1336	2430	Q63932|MP2K2_MOUSE	1.37	171.22	1030	1010	1	0.98	1030	1010	1	0.98	-	-	7	6	2	TMT6plex	44402	Dual specificity mitogen-activated protein kinase kinase 2 OS=Mus musculus GN=Map2k2 PE=1 SV=2
1873	1531	tr|D3Z3F4|D3Z3F4_MOUSE	2.41	171.21	4050	3860	1	0.95	4050	3860	1	0.95	-	-	13	5	5	Carbamidomethylation; TMT6plex	40261	Metaxin-1 (Fragment) OS=Mus musculus GN=Mtx1 PE=1 SV=2
1873	1549	tr|F7C846|F7C846_MOUSE	2.41	171.21	4050	3860	1	0.95	4050	3860	1	0.95	-	-	10	5	5	Carbamidomethylation; TMT6plex	51342	Metaxin-1 OS=Mus musculus GN=Mtx1 PE=1 SV=1
953	2339	P68037|UB2L3_MOUSE	2.91	171.1	13200	11400	1	0.86	13200	11400	1	0.86	-	-	38	7	5	Carbamidomethylation; TMT6plex	17862	Ubiquitin-conjugating enzyme E2 L3 OS=Mus musculus GN=Ube2l3 PE=1 SV=1
1284	1363	Q8R016|BLMH_MOUSE	2.23	171.02	7190	6520	1	0.91	7190	6520	1	0.91	-	-	18	11	10	Carbamidomethylation; TMT6plex	52511	Bleomycin hydrolase OS=Mus musculus GN=Blmh PE=1 SV=1
1427	1687	P51174|ACADL_MOUSE	0.83	171	4210	4260	1	1.01	4210	4260	1	1.01	-	-	18	7	6	TMT6plex; Deamidation (NQ)	47908	Long-chain specific acyl-CoA dehydrogenase mitochondrial OS=Mus musculus GN=Acadl PE=1 SV=2
632	2660	P62806|H4_MOUSE	32.85	170.81	57300	40300	1	0.7	57300	40300	1	0.7	-	-	57	8	7	TMT6plex; Oxidation (M)	11367	Histone H4 OS=Mus musculus GN=Hist1h4a PE=1 SV=2
1512	1594	O89112|LANC1_MOUSE	2.25	170.8	13700	11700	1	0.85	13700	11700	1	0.85	-	-	17	6	5	Carbamidomethylation; TMT6plex	45341	LanC-like protein 1 OS=Mus musculus GN=Lancl1 PE=1 SV=1
1181	1739	Q9DBC7|KAP0_MOUSE	1.73	170.71	4800	5300	1	1.1	4800	5300	1	1.1	-	-	16	7	6	Carbamidomethylation; TMT6plex	43185	cAMP-dependent protein kinase type I-alpha regulatory subunit OS=Mus musculus GN=Prkar1a PE=1 SV=3
1277	1615	Q80YN3|BCAS1_MOUSE	3.49	170.59	7270	6290	1	0.86	7270	6290	1	0.86	-	-	14	8	7	Carbamidomethylation; TMT6plex; Deamidation (NQ)	67378	Breast carcinoma-amplified sequence 1 homolog OS=Mus musculus GN=Bcas1 PE=1 SV=3
1007	1553	Q9CQN1|TRAP1_MOUSE	3.32	170.46	1460	1870	1	1.28	1460	1870	1	1.28	-	-	7	6	5	TMT6plex	80209	Heat shock protein 75 kDa mitochondrial OS=Mus musculus GN=Trap1 PE=1 SV=1
978	1124	tr|A0A0R4J087|A0A0R4J087_MOUSE	4.89	170.33	1100	865.012	1	0.78	1100	865.012	1	0.78	-	-	4	4	3	Carbamidomethylation; TMT6plex	80757	Transporter OS=Mus musculus GN=Slc6a17 PE=1 SV=1
978	1125	Q8BJI1|S6A17_MOUSE	4.89	170.33	1100	865.012	1	0.78	1100	865.012	1	0.78	-	-	4	4	3	Carbamidomethylation; TMT6plex	81071	Sodium-dependent neutral amino acid transporter SLC6A17 OS=Mus musculus GN=Slc6a17 PE=1 SV=1
853	1224	P35235|PTN11_MOUSE	1.71	170.17	2050	2110	1	1.03	2050	2110	1	1.03	-	-	8	7	4	TMT6plex; Oxidation (M)	68460	Tyrosine-protein phosphatase non-receptor type 11 OS=Mus musculus GN=Ptpn11 PE=1 SV=2
1343	1782	Q640R3|HECAM_MOUSE	0.26	169.93	4410	4410	1	1	4410	4410	1	1	-	-	20	8	5	TMT6plex	46367	Hepatocyte cell adhesion molecule OS=Mus musculus GN=Hepacam PE=1 SV=2
1761	1196	Q9Z2D6|MECP2_MOUSE	1.29	169.92	3950	3560	1	0.9	3950	3560	1	0.9	-	-	15	6	6	Carbamidomethylation; TMT6plex	52308	Methyl-CpG-binding protein 2 OS=Mus musculus GN=Mecp2 PE=1 SV=1
947	3026	P61750|ARF4_MOUSE	2.33	169.81	532	392.807	1	0.74	532	392.807	1	0.74	-	-	6	6	1	TMT6plex	20397	ADP-ribosylation factor 4 OS=Mus musculus GN=Arf4 PE=1 SV=2
1375	1855	Q8VHI6|WASF3_MOUSE	5.22	169.76	1210	1100	1	0.91	1210	1100	1	0.91	-	-	8	5	3	TMT6plex	55204	Wiskott-Aldrich syndrome protein family member 3 OS=Mus musculus GN=Wasf3 PE=1 SV=1
627	1263	tr|Z4YL78|Z4YL78_MOUSE	2.76	169.7	955	1060	1	1.11	955	1060	1	1.11	-	-	1	13	3	TMT6plex	218706	Cytoskeleton-associated protein 5 OS=Mus musculus GN=Ckap5 PE=1 SV=1
627	1264	tr|A0A0R4J0K2|A0A0R4J0K2_MOUSE	2.76	169.7	955	1060	1	1.11	955	1060	1	1.11	-	-	1	13	3	TMT6plex	223517	Cytoskeleton-associated protein 5 OS=Mus musculus GN=Ckap5 PE=1 SV=1
627	1265	A2AGT5|CKAP5_MOUSE	2.76	169.7	955	1060	1	1.11	955	1060	1	1.11	-	-	1	13	3	TMT6plex	225633	Cytoskeleton-associated protein 5 OS=Mus musculus GN=Ckap5 PE=1 SV=1
627	1266	tr|K3W4R5|K3W4R5_MOUSE	2.76	169.7	955	1060	1	1.11	955	1060	1	1.11	-	-	1	13	3	TMT6plex	225634	Cytoskeleton-associated protein 5 OS=Mus musculus GN=Ckap5 PE=1 SV=1
2574	3041	P62830|RL23_MOUSE	4.17	169.68	3770	3210	1	0.85	3770	3210	1	0.85	-	-	38	4	4	Carbamidomethylation; TMT6plex; Oxidation (M)	14865	60S ribosomal protein L23 OS=Mus musculus GN=Rpl23 PE=1 SV=1
875	1883	Q61411|RASH_MOUSE	2.05	169.45	722	942.021	1	1.3	722	942.021	1	1.3	-	-	5	6	1	TMT6plex	21298	GTPase HRas OS=Mus musculus GN=Hras PE=1 SV=2
1387	1551	tr|E9PYI8|E9PYI8_MOUSE	2.39	169.23	3450	3290	1	0.96	3450	3290	1	0.96	-	-	9	7	4	Carbamidomethylation; TMT6plex	52319	Ubiquitin carboxyl-terminal hydrolase 14 OS=Mus musculus GN=Usp14 PE=1 SV=1
1387	1554	Q9JMA1|UBP14_MOUSE	2.39	169.23	3450	3290	1	0.96	3450	3290	1	0.96	-	-	9	7	4	Carbamidomethylation; TMT6plex	56002	Ubiquitin carboxyl-terminal hydrolase 14 OS=Mus musculus GN=Usp14 PE=1 SV=3
871	3025	tr|A0A1W2P879|A0A1W2P879_MOUSE	1.75	169.15	722	581.45	1	0.81	722	581.45	1	0.81	-	-	19	5	1	TMT6plex; Deamidation (NQ)	15809	Paralemmin-1 (Fragment) OS=Mus musculus GN=Palm PE=1 SV=1
1250	1190	P23116|EIF3A_MOUSE	2.15	169.14	2440	2170	1	0.89	2440	2170	1	0.89	-	-	4	9	5	TMT6plex	161936	Eukaryotic translation initiation factor 3 subunit A OS=Mus musculus GN=Eif3a PE=1 SV=5
1444	2068	Q60996|2A5G_MOUSE	3.9	169.11	550	439.371	1	0.8	550	439.371	1	0.8	-	-	1	8	1	TMT6plex	60825	Serine/threonine-protein phosphatase 2A 56 kDa regulatory subunit gamma isoform OS=Mus musculus GN=Ppp2r5c PE=1 SV=2
1251	1256	Q9R1V6|ADA22_MOUSE	1.85	169.06	4630	4360	1	0.94	4630	4360	1	0.94	-	-	10	9	8	Carbamidomethylation; TMT6plex; Deamidation (NQ)	99715	Disintegrin and metalloproteinase domain-containing protein 22 OS=Mus musculus GN=Adam22 PE=1 SV=2
1045	1372	tr|B1AT92|B1AT92_MOUSE	1.72	168.9	7420	6680	1	0.9	7420	6680	1	0.9	-	-	32	7	6	Carbamidomethylation; TMT6plex	23588	Growth factor receptor-bound protein 2 OS=Mus musculus GN=Grb2 PE=1 SV=1
1045	1374	Q60631|GRB2_MOUSE	1.72	168.9	7420	6680	1	0.9	7420	6680	1	0.9	-	-	29	7	6	Carbamidomethylation; TMT6plex	25238	Growth factor receptor-bound protein 2 OS=Mus musculus GN=Grb2 PE=1 SV=1
1412	2208	Q9R0Q7|TEBP_MOUSE	3.6	168.84	9240	7510	1	0.81	9240	7510	1	0.81	-	-	41	6	6	Carbamidomethylation; TMT6plex	18721	Prostaglandin E synthase 3 OS=Mus musculus GN=Ptges3 PE=1 SV=1
390	2603	P56391|CX6B1_MOUSE	5.68	168.77	70000	70800	1	1.01	70000	70800	1	1.01	-	-	71	7	7	Carbamidomethylation; TMT6plex	10071	Cytochrome c oxidase subunit 6B1 OS=Mus musculus GN=Cox6b1 PE=1 SV=2
1080	1167	tr|Q5F258|Q5F258_MOUSE	1.99	168.7	2250	2040	1	0.91	2250	2040	1	0.91	-	-	7	6	5	TMT6plex; Oxidation (M); Deamidation (NQ)	84195	ARF GTPase-activating protein GIT1 OS=Mus musculus GN=Git1 PE=1 SV=1
1080	1168	Q68FF6|GIT1_MOUSE	1.99	168.7	2250	2040	1	0.91	2250	2040	1	0.91	-	-	7	6	5	TMT6plex; Oxidation (M); Deamidation (NQ)	85300	ARF GTPase-activating protein GIT1 OS=Mus musculus GN=Git1 PE=1 SV=1
902	2414	P70349|HINT1_MOUSE	2.25	168.7	19300	18900	1	0.98	19300	18900	1	0.98	-	-	63	8	6	Carbamidomethylation; TMT6plex	13777	Histidine triad nucleotide-binding protein 1 OS=Mus musculus GN=Hint1 PE=1 SV=3
1640	1517	Q8BP47|SYNC_MOUSE	2.13	168.58	5720	4980	1	0.87	5720	4980	1	0.87	-	-	18	9	9	Carbamidomethylation; TMT6plex	64279	Asparagine--tRNA ligase cytoplasmic OS=Mus musculus GN=Nars PE=1 SV=2
912	1391	Q6P1F6|2ABA_MOUSE	1.09	168.57	2590	2610	1	1.01	2590	2610	1	1.01	-	-	11	8	4	TMT6plex	51692	Serine/threonine-protein phosphatase 2A 55 kDa regulatory subunit B alpha isoform OS=Mus musculus GN=Ppp2r2a PE=1 SV=1
1050	1410	P42208|SEPT2_MOUSE	2.27	168.55	3450	3460	1	1	3450	3460	1	1	-	-	19	7	5	TMT6plex	41526	Septin-2 OS=Mus musculus GN=Sept2 PE=1 SV=2
482	3487	P10854|H2B1M_MOUSE	41.97	168.53	59200	74100	1	1.25	59200	74100	1	1.25	-	-	35	7	7	TMT6plex; Oxidation (M); Deamidation (NQ)	13936	Histone H2B type 1-M OS=Mus musculus GN=Hist1h2bm PE=1 SV=2
482	3502	Q8CGP2|H2B1P_MOUSE	41.97	168.53	59200	74100	1	1.25	59200	74100	1	1.25	-	-	35	7	7	TMT6plex; Oxidation (M); Deamidation (NQ)	13992	Histone H2B type 1-P OS=Mus musculus GN=Hist1h2bp PE=1 SV=3
482	3503	Q8CGP1|H2B1K_MOUSE	41.97	168.53	59200	74100	1	1.25	59200	74100	1	1.25	-	-	35	7	7	TMT6plex; Oxidation (M); Deamidation (NQ)	13920	Histone H2B type 1-K OS=Mus musculus GN=Hist1h2bk PE=1 SV=3
482	3504	P10853|H2B1F_MOUSE	41.97	168.53	59200	74100	1	1.25	59200	74100	1	1.25	-	-	35	7	7	TMT6plex; Oxidation (M); Deamidation (NQ)	13936	Histone H2B type 1-F/J/L OS=Mus musculus GN=Hist1h2bf PE=1 SV=2
482	3505	Q64475|H2B1B_MOUSE	41.97	168.53	59200	74100	1	1.25	59200	74100	1	1.25	-	-	35	7	7	TMT6plex; Oxidation (M); Deamidation (NQ)	13952	Histone H2B type 1-B OS=Mus musculus GN=Hist1h2bb PE=1 SV=3
482	3506	tr|Q8CBB6|Q8CBB6_MOUSE	41.97	168.53	59200	74100	1	1.25	59200	74100	1	1.25	-	-	33	7	7	TMT6plex; Oxidation (M); Deamidation (NQ)	14888	Histone H2B OS=Mus musculus GN=Hist1h2bq PE=2 SV=1
482	3508	Q64525|H2B2B_MOUSE	41.97	168.53	59200	74100	1	1.25	59200	74100	1	1.25	-	-	35	7	7	TMT6plex; Oxidation (M); Deamidation (NQ)	13920	Histone H2B type 2-B OS=Mus musculus GN=Hist2h2bb PE=1 SV=3
482	3509	Q6ZWY9|H2B1C_MOUSE	41.97	168.53	59200	74100	1	1.25	59200	74100	1	1.25	-	-	35	7	7	TMT6plex; Oxidation (M); Deamidation (NQ)	13906	Histone H2B type 1-C/E/G OS=Mus musculus GN=Hist1h2bc PE=1 SV=3
482	3510	Q64478|H2B1H_MOUSE	41.97	168.53	59200	74100	1	1.25	59200	74100	1	1.25	-	-	35	7	7	TMT6plex; Oxidation (M); Deamidation (NQ)	13920	Histone H2B type 1-H OS=Mus musculus GN=Hist1h2bh PE=1 SV=3
507	1503	P35279|RAB6A_MOUSE	4.6	168.4	3290	3390	1	1.03	3290	3390	1	1.03	-	-	11	10	2	TMT6plex; Oxidation (M)	23590	Ras-related protein Rab-6A OS=Mus musculus GN=Rab6a PE=1 SV=4
807	1770	Q9Z1Z0|USO1_MOUSE	3.51	168.33	2610	2220	1	0.85	2610	2220	1	0.85	-	-	4	9	4	TMT6plex	106983	General vesicular transport factor p115 OS=Mus musculus GN=Uso1 PE=1 SV=2
654	1788	tr|D3YVP5|D3YVP5_MOUSE	1.67	168.28	544	552.796	1	1.02	544	552.796	1	1.02	-	-	4	10	1	Carbamidomethylation; TMT6plex	25103	Glutathione S-transferase Mu 7 OS=Mus musculus GN=Gstm7 PE=1 SV=1
654	1793	Q80W21|GSTM7_MOUSE	1.67	168.28	544	552.796	1	1.02	544	552.796	1	1.02	-	-	4	10	1	Carbamidomethylation; TMT6plex	25710	Glutathione S-transferase Mu 7 OS=Mus musculus GN=Gstm7 PE=1 SV=1
1650	1579	Q9Z2Y8|PLPHP_MOUSE	1.81	168.22	4300	3970	1	0.92	4300	3970	1	0.92	-	-	30	8	7	Carbamidomethylation; TMT6plex	30049	Pyridoxal phosphate homeostasis protein OS=Mus musculus GN=Prosc PE=1 SV=1
1650	1584	tr|A0A1B0GRP7|A0A1B0GRP7_MOUSE	1.81	168.22	4300	3970	1	0.92	4300	3970	1	0.92	-	-	25	8	7	Carbamidomethylation; TMT6plex	36180	Pyridoxal phosphate homeostasis protein (Fragment) OS=Mus musculus GN=Prosc PE=1 SV=1
442	3039	P84086|CPLX2_MOUSE	4.54	168.21	34400	28000	1	0.81	34400	28000	1	0.81	-	-	43	7	4	Carbamidomethylation; TMT6plex; Oxidation (M); Acetylation (Protein N-term)	15394	Complexin-2 OS=Mus musculus GN=Cplx2 PE=1 SV=1
830	1036	Q8BH44|COR2B_MOUSE	4.35	168.14	10700	11200	1	1.05	10700	11200	1	1.05	-	-	17	11	9	Carbamidomethylation; TMT6plex	54936	Coronin-2B OS=Mus musculus GN=Coro2b PE=1 SV=2
1001	2287	P32883|RASK_MOUSE	2.19	168.06	1110	833.372	1	0.75	1110	833.372	1	0.75	-	-	7	8	1	TMT6plex	21656	GTPase KRas OS=Mus musculus GN=Kras PE=1 SV=1
1584	2271	Q791V5|MTCH2_MOUSE	6.12	168	10000	7590	1	0.76	10000	7590	1	0.76	-	-	23	6	5	Carbamidomethylation; TMT6plex; Deamidation (NQ)	33499	Mitochondrial carrier homolog 2 OS=Mus musculus GN=Mtch2 PE=1 SV=1
1266	1802	Q3UGR5|HDHD2_MOUSE	5.43	167.97	3390	4800	1	1.42	3390	4800	1	1.42	-	-	28	8	5	TMT6plex	28730	Haloacid dehalogenase-like hydrolase domain-containing protein 2 OS=Mus musculus GN=Hdhd2 PE=1 SV=2
1217	1356	Q8BK64|AHSA1_MOUSE	2.09	167.94	7390	6500	1	0.88	7390	6500	1	0.88	-	-	34	11	10	TMT6plex	38117	Activator of 90 kDa heat shock protein ATPase homolog 1 OS=Mus musculus GN=Ahsa1 PE=1 SV=2
1774	1449	Q61035|SYHC_MOUSE	3.94	167.61	2590	2140	1	0.83	2590	2140	1	0.83	-	-	13	10	6	TMT6plex	57432	Histidine--tRNA ligase cytoplasmic OS=Mus musculus GN=Hars PE=1 SV=2
1160	1369	Q60676|PPP5_MOUSE	2.45	167.49	7510	6560	1	0.87	7510	6560	1	0.87	-	-	14	9	8	Carbamidomethylation; TMT6plex	56877	Serine/threonine-protein phosphatase 5 OS=Mus musculus GN=Ppp5c PE=1 SV=3
1985	1522	Q9DBE8|ALG2_MOUSE	4.19	167.44	405	254.31	1	0.63	405	254.31	1	0.63	-	-	2	2	1	TMT6plex	47405	Alpha-1 3/1 6-mannosyltransferase ALG2 OS=Mus musculus GN=Alg2 PE=1 SV=2
818	2281	O55126|NIPS2_MOUSE	2.82	167.43	13400	16200	1	1.2	13400	16200	1	1.2	-	-	17	6	4	Carbamidomethylation; TMT6plex	32933	Protein NipSnap homolog 2 OS=Mus musculus GN=Nipsnap2 PE=1 SV=1
1571	1667	O35633|VIAAT_MOUSE	1.64	167.34	2890	2540	1	0.88	2890	2540	1	0.88	-	-	10	6	5	Carbamidomethylation; TMT6plex	57381	Vesicular inhibitory amino acid transporter OS=Mus musculus GN=Slc32a1 PE=1 SV=3
724	1824	Q9D855|QCR7_MOUSE	5.64	167.32	22200	23000	1	1.04	22200	23000	1	1.04	-	-	68	12	11	TMT6plex	13527	Cytochrome b-c1 complex subunit 7 OS=Mus musculus GN=Uqcrb PE=1 SV=3
724	1825	tr|Q9CQB4|Q9CQB4_MOUSE	5.64	167.32	22200	23000	1	1.04	22200	23000	1	1.04	-	-	68	12	11	TMT6plex	13561	Cytochrome b-c1 complex subunit 7 OS=Mus musculus GN=Uqcrb PE=1 SV=1
1735	2058	Q8BNY6|NCS1_MOUSE	1.56	167.28	1950	1920	1	0.98	1950	1920	1	0.98	-	-	19	4	4	TMT6plex; Oxidation (M); Deamidation (NQ)	21879	Neuronal calcium sensor 1 OS=Mus musculus GN=Ncs1 PE=1 SV=3
1103	2042	tr|A0A0R4J2B2|A0A0R4J2B2_MOUSE	1.78	167.09	5010	4330	1	0.86	5010	4330	1	0.86	-	-	17	7	5	TMT6plex	35888	BTB/POZ domain-containing protein KCTD12 OS=Mus musculus GN=Kctd12 PE=1 SV=1
1440	1347	Q8BJY1|PSMD5_MOUSE	2.55	167.05	2350	1930	1	0.82	2350	1930	1	0.82	-	-	10	6	4	Carbamidomethylation; TMT6plex	55972	26S proteasome non-ATPase regulatory subunit 5 OS=Mus musculus GN=Psmd5 PE=1 SV=4
837	1596	P68181|KAPCB_MOUSE	2.63	166.99	968	828.597	1	0.86	968	828.597	1	0.86	-	-	2	11	1	TMT6plex	40708	cAMP-dependent protein kinase catalytic subunit beta OS=Mus musculus GN=Prkacb PE=1 SV=2
1695	1313	Q8CBE3|WDR37_MOUSE	0.8	166.79	5600	5490	1	0.98	5600	5490	1	0.98	-	-	18	8	8	Carbamidomethylation; TMT6plex; Deamidation (NQ)	55046	WD repeat-containing protein 37 OS=Mus musculus GN=Wdr37 PE=1 SV=1
998	2539	P32848|PRVA_MOUSE	1.57	166.75	14200	14800	1	1.05	14200	14800	1	1.05	-	-	54	7	7	TMT6plex; Oxidation (M)	11931	Parvalbumin alpha OS=Mus musculus GN=Pvalb PE=1 SV=3
2488	2762	Q6X893|CTL1_MOUSE	4.92	166.63	342	490.711	1	1.43	342	490.711	1	1.43	-	-	1	3	1	TMT6plex	73067	Choline transporter-like protein 1 OS=Mus musculus GN=Slc44a1 PE=1 SV=3
672	1566	P59764|DOCK4_MOUSE	2.45	166.61	5710	5660	1	0.99	5710	5660	1	0.99	-	-	3	12	6	TMT6plex; Deamidation (NQ)	226548	Dedicator of cytokinesis protein 4 OS=Mus musculus GN=Dock4 PE=1 SV=1
1194	2096	tr|A2ASI5|A2ASI5_MOUSE	4.19	166.53	980	1230	1	1.26	980	1230	1	1.26	-	-	0	9	1	TMT6plex	220878	Sodium channel protein OS=Mus musculus GN=Scn3a PE=1 SV=1
1622	2081	Q99J08|S14L2_MOUSE	1.17	166.45	1920	1760	1	0.91	1920	1760	1	0.91	-	-	9	4	3	TMT6plex	46300	SEC14-like protein 2 OS=Mus musculus GN=Sec14l2 PE=1 SV=1
1395	1104	Q9Z1Q9|SYVC_MOUSE	3.06	166.14	3710	3220	1	0.87	3710	3220	1	0.87	-	-	7	8	8	TMT6plex	140215	Valine--tRNA ligase OS=Mus musculus GN=Vars PE=1 SV=1
936	2010	tr|B7FAV1|B7FAV1_MOUSE	1.95	166.03	393	302.068	1	0.77	393	302.068	1	0.77	-	-	1	6	1	TMT6plex; Deamidation (NQ)	274626	Filamin alpha (Fragment) OS=Mus musculus GN=Flna PE=1 SV=1
936	2013	tr|B7FAU9|B7FAU9_MOUSE	1.95	166.03	393	302.068	1	0.77	393	302.068	1	0.77	-	-	0	6	1	TMT6plex; Deamidation (NQ)	280498	Filamin alpha OS=Mus musculus GN=Flna PE=1 SV=1
936	2015	Q8BTM8|FLNA_MOUSE	1.95	166.03	393	302.068	1	0.77	393	302.068	1	0.77	-	-	0	6	1	TMT6plex; Deamidation (NQ)	281219	Filamin-A OS=Mus musculus GN=Flna PE=1 SV=5
852	1746	Q63912|OMGP_MOUSE	1.16	165.94	6690	6560	1	0.98	6690	6560	1	0.98	-	-	12	6	6	TMT6plex; Oxidation (M)	49284	Oligodendrocyte-myelin glycoprotein OS=Mus musculus GN=Omg PE=1 SV=1
852	1747	tr|G3XA53|G3XA53_MOUSE	1.16	165.94	6690	6560	1	0.98	6690	6560	1	0.98	-	-	12	6	6	TMT6plex; Oxidation (M)	49599	Oligodendrocyte myelin glycoprotein OS=Mus musculus GN=Omg PE=1 SV=1
1208	2161	Q9Z1P6|NDUA7_MOUSE	2.83	165.88	8740	8470	1	0.97	8740	8470	1	0.97	-	-	62	7	7	TMT6plex	12576	NADH dehydrogenase [ubiquinone] 1 alpha subcomplex subunit 7 OS=Mus musculus GN=Ndufa7 PE=1 SV=3
1394	2391	Q9DBP5|KCY_MOUSE	1.67	165.8	5840	5540	1	0.95	5840	5540	1	0.95	-	-	35	9	6	TMT6plex; Oxidation (M)	22165	UMP-CMP kinase OS=Mus musculus GN=Cmpk1 PE=1 SV=1
1394	2393	tr|A0A0R4J093|A0A0R4J093_MOUSE	1.67	165.8	5840	5540	1	0.95	5840	5540	1	0.95	-	-	30	9	6	TMT6plex; Oxidation (M)	25715	UMP-CMP kinase OS=Mus musculus GN=Cmpk1 PE=1 SV=1
923	1722	tr|F6ZV59|F6ZV59_MOUSE	3.64	165.75	7120	5520	1	0.78	7120	5520	1	0.78	-	-	19	8	5	Carbamidomethylation; TMT6plex; Oxidation (M)	24730	Heterogeneous nuclear ribonucleoprotein D0 (Fragment) OS=Mus musculus GN=Hnrnpd PE=1 SV=1
923	1737	tr|G5E8G0|G5E8G0_MOUSE	3.64	165.75	7120	5520	1	0.78	7120	5520	1	0.78	-	-	15	8	5	Carbamidomethylation; TMT6plex; Oxidation (M)	30608	Heterogeneous nuclear ribonucleoprotein D isoform CRA_b OS=Mus musculus GN=Hnrnpd PE=1 SV=1
923	1762	tr|G3X9W0|G3X9W0_MOUSE	3.64	165.75	7120	5520	1	0.78	7120	5520	1	0.78	-	-	12	8	5	Carbamidomethylation; TMT6plex; Oxidation (M)	36208	Heterogeneous nuclear ribonucleoprotein D isoform CRA_a OS=Mus musculus GN=Hnrnpd PE=1 SV=1
923	1767	Q60668|HNRPD_MOUSE	3.64	165.75	7120	5520	1	0.78	7120	5520	1	0.78	-	-	12	8	5	Carbamidomethylation; TMT6plex; Oxidation (M)	38354	Heterogeneous nuclear ribonucleoprotein D0 OS=Mus musculus GN=Hnrnpd PE=1 SV=2
992	1321	P48318|DCE1_MOUSE	1.43	165.7	4010	3710	1	0.93	4010	3710	1	0.93	-	-	4	5	2	TMT6plex	66648	Glutamate decarboxylase 1 OS=Mus musculus GN=Gad1 PE=1 SV=2
1857	2559	Q9WV18|GABR1_MOUSE	1.76	165.44	1140	1070	1	0.94	1140	1070	1	0.94	-	-	5	6	4	Carbamidomethylation; TMT6plex	108216	Gamma-aminobutyric acid type B receptor subunit 1 OS=Mus musculus GN=Gabbr1 PE=1 SV=1
1600	1890	Q8VDJ3|VIGLN_MOUSE	2.35	165.4	2950	2530	1	0.86	2950	2530	1	0.86	-	-	4	6	5	TMT6plex; Deamidation (NQ)	141742	Vigilin OS=Mus musculus GN=Hdlbp PE=1 SV=1
1060	1096	Q9JIA1|LGI1_MOUSE	0.65	165.37	5420	5450	1	1.01	5420	5450	1	1.01	-	-	17	8	8	Carbamidomethylation; TMT6plex	63644	Leucine-rich glioma-inactivated protein 1 OS=Mus musculus GN=Lgi1 PE=1 SV=1
1170	1308	Q9WV80|SNX1_MOUSE	1.81	165.27	2870	2750	1	0.96	2870	2750	1	0.96	-	-	7	7	3	TMT6plex	58952	Sorting nexin-1 OS=Mus musculus GN=Snx1 PE=1 SV=1
1170	1312	tr|Q6NZD2|Q6NZD2_MOUSE	1.81	165.27	2870	2750	1	0.96	2870	2750	1	0.96	-	-	7	7	3	TMT6plex	58879	Putative uncharacterized protein OS=Mus musculus GN=Snx1 PE=1 SV=1
1332	1468	tr|Q3TUE1|Q3TUE1_MOUSE	2.25	165.21	2820	2650	1	0.94	2820	2650	1	0.94	-	-	8	9	5	Carbamidomethylation; TMT6plex	67443	Far upstream element-binding protein 1 OS=Mus musculus GN=Fubp1 PE=1 SV=1
1332	1469	tr|A0A0G2JGW9|A0A0G2JGW9_MOUSE	2.25	165.21	2820	2650	1	0.94	2820	2650	1	0.94	-	-	8	9	5	Carbamidomethylation; TMT6plex	67530	Far upstream element-binding protein 1 OS=Mus musculus GN=Fubp1 PE=1 SV=1
1332	1471	Q91WJ8|FUBP1_MOUSE	2.25	165.21	2820	2650	1	0.94	2820	2650	1	0.94	-	-	8	9	5	Carbamidomethylation; TMT6plex	68540	Far upstream element-binding protein 1 OS=Mus musculus GN=Fubp1 PE=1 SV=1
1332	1473	tr|A0A0G2JFY5|A0A0G2JFY5_MOUSE	2.25	165.21	2820	2650	1	0.94	2820	2650	1	0.94	-	-	8	9	5	Carbamidomethylation; TMT6plex	68874	Far upstream element-binding protein 1 OS=Mus musculus GN=Fubp1 PE=1 SV=1
1332	1478	tr|Q3UUU2|Q3UUU2_MOUSE	2.25	165.21	2820	2650	1	0.94	2820	2650	1	0.94	-	-	7	9	5	Carbamidomethylation; TMT6plex	74486	Far upstream element-binding protein 1 OS=Mus musculus GN=Fubp1 PE=1 SV=1
1137	1692	P62192|PRS4_MOUSE	1.55	164.99	3440	3160	1	0.92	3440	3160	1	0.92	-	-	5	6	3	TMT6plex	49185	26S proteasome regulatory subunit 4 OS=Mus musculus GN=Psmc1 PE=1 SV=1
1402	2104	Q9CYH2|F213A_MOUSE	0.6	164.92	8000	7970	1	1	8000	7970	1	1	-	-	33	8	7	TMT6plex	24395	Redox-regulatory protein FAM213A OS=Mus musculus GN=Fam213a PE=1 SV=2
1402	2105	tr|Q3U125|Q3U125_MOUSE	0.6	164.92	8000	7970	1	1	8000	7970	1	1	-	-	32	8	7	TMT6plex	25682	Putative uncharacterized protein OS=Mus musculus GN=Fam213a PE=1 SV=1
1222	2309	Q8K4Z3|NNRE_MOUSE	0.53	164.87	6050	5960	1	0.98	6050	5960	1	0.98	-	-	17	4	4	TMT6plex	30973	NAD(P)H-hydrate epimerase OS=Mus musculus GN=Naxe PE=1 SV=1
1459	1798	Q9WVA4|TAGL2_MOUSE	1.66	164.54	640	663.832	1	1.04	640	663.832	1	1.04	-	-	15	4	2	TMT6plex	22395	Transgelin-2 OS=Mus musculus GN=Tagln2 PE=1 SV=4
1129	1373	P62908|RS3_MOUSE	6.17	164.38	7520	5250	1	0.7	7520	5250	1	0.7	-	-	25	7	6	TMT6plex	26674	40S ribosomal protein S3 OS=Mus musculus GN=Rps3 PE=1 SV=1
1015	3173	tr|Q8CFQ9|Q8CFQ9_MOUSE	4.88	164.36	8010	6060	1	0.76	8010	6060	1	0.76	-	-	11	7	4	TMT6plex	52602	Fusion derived from t(1216) malignant liposarcoma (Human) OS=Mus musculus GN=Fus PE=1 SV=1
1015	3174	P56959|FUS_MOUSE	4.88	164.36	8010	6060	1	0.76	8010	6060	1	0.76	-	-	11	7	4	TMT6plex	52673	RNA-binding protein FUS OS=Mus musculus GN=Fus PE=1 SV=1
1577	2178	Q9JI46|NUDT3_MOUSE	2.17	164.33	5920	5090	1	0.86	5920	5090	1	0.86	-	-	29	6	5	Carbamidomethylation; TMT6plex	19030	Diphosphoinositol polyphosphate phosphohydrolase 1 OS=Mus musculus GN=Nudt3 PE=1 SV=1
610	1958	Q6IRU5|CLCB_MOUSE	4.3	164.25	25200	21500	1	0.85	25200	21500	1	0.85	-	-	37	12	11	Carbamidomethylation; TMT6plex; Oxidation (M)	25172	Clathrin light chain B OS=Mus musculus GN=Cltb PE=1 SV=1
1026	1225	P61202|CSN2_MOUSE	2.23	164.18	7590	6880	1	0.91	7590	6880	1	0.91	-	-	23	10	9	TMT6plex	51597	COP9 signalosome complex subunit 2 OS=Mus musculus GN=Cops2 PE=1 SV=1
1018	1150	Q9JLV5|CUL3_MOUSE	1.85	164.16	2150	2200	1	1.02	2150	2200	1	1.02	-	-	9	8	6	Carbamidomethylation; TMT6plex	88948	Cullin-3 OS=Mus musculus GN=Cul3 PE=1 SV=1
1358	1849	Q9R1P0|PSA4_MOUSE	1.79	164.11	10900	10400	1	0.96	10900	10400	1	0.96	-	-	30	7	7	Carbamidomethylation; TMT6plex	29471	Proteasome subunit alpha type-4 OS=Mus musculus GN=Psma4 PE=1 SV=1
1636	1982	Q9Z2X1|HNRPF_MOUSE	5.11	163.98	4380	3110	1	0.71	4380	3110	1	0.71	-	-	11	8	5	Carbamidomethylation; TMT6plex	45730	Heterogeneous nuclear ribonucleoprotein F OS=Mus musculus GN=Hnrnpf PE=1 SV=3
1560	1559	P14685|PSMD3_MOUSE	0.97	163.71	2820	2720	1	0.97	2820	2720	1	0.97	-	-	11	6	5	TMT6plex	60718	26S proteasome non-ATPase regulatory subunit 3 OS=Mus musculus GN=Psmd3 PE=1 SV=3
1575	3065	P84096|RHOG_MOUSE	2.44	163.65	3510	3520	1	1	3510	3520	1	1	-	-	21	4	3	Carbamidomethylation; TMT6plex; Deamidation (NQ)	21308	Rho-related GTP-binding protein RhoG OS=Mus musculus GN=Rhog PE=1 SV=1
1450	1457	P58404|STRN4_MOUSE	2.4	163.63	1520	1390	1	0.91	1520	1390	1	0.91	-	-	2	4	1	TMT6plex	81645	Striatin-4 OS=Mus musculus GN=Strn4 PE=1 SV=2
1039	1216	O70589|CSKP_MOUSE	1.58	163.51	6120	5390	1	0.88	6120	5390	1	0.88	-	-	11	12	10	TMT6plex; Deamidation (NQ)	105109	Peripheral plasma membrane protein CASK OS=Mus musculus GN=Cask PE=1 SV=2
1563	2422	tr|Q6XE40|Q6XE40_MOUSE	2.03	163.49	2030	2450	1	1.2	2030	2450	1	1.2	-	-	4	4	3	TMT6plex; Deamidation (NQ)	66486	MAGUK p55 subfamily member 3 OS=Mus musculus GN=Mpp3 PE=1 SV=1
1390	2027	Q8BLR2|CPNE4_MOUSE	3.21	163.47	1740	1390	1	0.8	1740	1390	1	0.8	-	-	6	4	3	TMT6plex	62408	Copine-4 OS=Mus musculus GN=Cpne4 PE=1 SV=1
1390	2031	tr|Q9D6C8|Q9D6C8_MOUSE	3.21	163.47	1740	1390	1	0.8	1740	1390	1	0.8	-	-	8	4	3	TMT6plex	52784	Copine-4 OS=Mus musculus GN=Cpne4 PE=1 SV=1
1895	1352	tr|E9Q2D0|E9Q2D0_MOUSE	0.83	163.43	2280	2260	1	0.99	2280	2260	1	0.99	-	-	11	4	4	TMT6plex	49256	WAS/WASL-interacting protein family member 3 OS=Mus musculus GN=Wipf3 PE=1 SV=1
1895	1353	P0C7L0|WIPF3_MOUSE	0.83	163.43	2280	2260	1	0.99	2280	2260	1	0.99	-	-	11	4	4	TMT6plex	49453	WAS/WASL-interacting protein family member 3 OS=Mus musculus GN=Wipf3 PE=1 SV=1
1802	2229	P47962|RL5_MOUSE	4.49	163.21	4480	4080	1	0.91	4480	4080	1	0.91	-	-	15	7	5	TMT6plex	34401	60S ribosomal protein L5 OS=Mus musculus GN=Rpl5 PE=1 SV=3
1519	1933	Q9WV69|DEMA_MOUSE	1.27	163.2	1070	1090	1	1.02	1070	1090	1	1.02	-	-	6	5	2	TMT6plex	45468	Dematin OS=Mus musculus GN=Dmtn PE=1 SV=1
1350	1276	tr|B1ATZ0|B1ATZ0_MOUSE	1.71	163.11	3190	2850	1	0.89	3190	2850	1	0.89	-	-	4	6	4	Carbamidomethylation; TMT6plex	85779	Hepatocyte growth factor-regulated tyrosine kinase substrate OS=Mus musculus GN=Hgs PE=1 SV=1
1350	1277	tr|B1ATZ1|B1ATZ1_MOUSE	1.71	163.11	3190	2850	1	0.89	3190	2850	1	0.89	-	-	4	6	4	Carbamidomethylation; TMT6plex	85907	Hepatocyte growth factor-regulated tyrosine kinase substrate OS=Mus musculus GN=Hgs PE=1 SV=1
1350	1279	Q99LI8|HGS_MOUSE	1.71	163.11	3190	2850	1	0.89	3190	2850	1	0.89	-	-	4	6	4	Carbamidomethylation; TMT6plex	86015	Hepatocyte growth factor-regulated tyrosine kinase substrate OS=Mus musculus GN=Hgs PE=1 SV=2
1350	1280	tr|Q3UMA3|Q3UMA3_MOUSE	1.71	163.11	3190	2850	1	0.89	3190	2850	1	0.89	-	-	4	6	4	Carbamidomethylation; TMT6plex	86143	Hepatocyte growth factor-regulated tyrosine kinase substrate OS=Mus musculus GN=Hgs PE=1 SV=1
1269	2526	tr|Q3TF41|Q3TF41_MOUSE	4.02	163.02	2230	1730	1	0.78	2230	1730	1	0.78	-	-	15	5	4	TMT6plex	42733	Nucleosome assembly protein 1-like 1 OS=Mus musculus GN=Nap1l1 PE=1 SV=1
1269	2527	tr|Q8BSH9|Q8BSH9_MOUSE	4.02	163.02	2230	1730	1	0.78	2230	1730	1	0.78	-	-	15	5	4	TMT6plex	44598	Nucleosome assembly protein 1-like 1 OS=Mus musculus GN=Nap1l1 PE=1 SV=1
1269	2528	P28656|NP1L1_MOUSE	4.02	163.02	2230	1730	1	0.78	2230	1730	1	0.78	-	-	15	5	4	TMT6plex	45345	Nucleosome assembly protein 1-like 1 OS=Mus musculus GN=Nap1l1 PE=1 SV=2
1269	2529	tr|E9PW66|E9PW66_MOUSE	4.02	163.02	2230	1730	1	0.78	2230	1730	1	0.78	-	-	14	5	4	TMT6plex	48543	Nucleosome assembly protein 1-like 1 OS=Mus musculus GN=Nap1l1 PE=1 SV=1
982	2704	tr|Q8R5L1|Q8R5L1_MOUSE	3.21	162.86	10000	8070	1	0.81	10000	8070	1	0.81	-	-	12	3	2	TMT6plex	31025	Complement component 1 Q subcomponent-binding protein mitochondrial OS=Mus musculus GN=C1qbp PE=1 SV=1
920	1714	Q9CQM9|GLRX3_MOUSE	4.01	162.85	2250	2380	1	1.06	2250	2380	1	1.06	-	-	15	10	5	TMT6plex; Deamidation (NQ)	37778	Glutaredoxin-3 OS=Mus musculus GN=Glrx3 PE=1 SV=1
814	1479	tr|E9Q3M9|E9Q3M9_MOUSE	5.39	162.84	1310	870.982	1	0.67	1310	870.982	1	0.67	-	-	2	4	2	TMT6plex	125910	RIKEN cDNA 2010300C02 gene OS=Mus musculus GN=2010300C02Rik PE=1 SV=1
836	1458	P46638|RB11B_MOUSE	2.56	162.83	15600	13500	1	0.86	15600	13500	1	0.86	-	-	45	9	9	TMT6plex	24489	Ras-related protein Rab-11B OS=Mus musculus GN=Rab11b PE=1 SV=3
2083	1368	Q91Z31|PTBP2_MOUSE	5.22	162.8	834	829.194	1	0.99	834	829.194	1	0.99	-	-	4	5	2	TMT6plex	57489	Polypyrimidine tract-binding protein 2 OS=Mus musculus GN=Ptbp2 PE=1 SV=2
1785	2375	tr|A0A0R4IZW8|A0A0R4IZW8_MOUSE	1.79	162.78	1700	1550	1	0.91	1700	1550	1	0.91	-	-	5	2	2	TMT6plex	28406	Calpain small subunit 1 OS=Mus musculus GN=Capns1 PE=1 SV=1
1785	2376	O88456|CPNS1_MOUSE	1.79	162.78	1700	1550	1	0.91	1700	1550	1	0.91	-	-	5	2	2	TMT6plex	28463	Calpain small subunit 1 OS=Mus musculus GN=Capns1 PE=1 SV=1
1249	1343	Q3V3R1|C1TM_MOUSE	2.58	162.64	3200	3330	1	1.04	3200	3330	1	1.04	-	-	5	8	5	TMT6plex	105729	Monofunctional C1-tetrahydrofolate synthase mitochondrial OS=Mus musculus GN=Mthfd1l PE=1 SV=2
1282	1706	tr|F6RPJ9|F6RPJ9_MOUSE	2.68	162.62	783	607.12	1	0.78	783	607.12	1	0.78	-	-	2	6	2	TMT6plex	114269	Insulin-degrading enzyme (Fragment) OS=Mus musculus GN=Ide PE=1 SV=1
1463	2306	Q3THE2|ML12B_MOUSE	3.81	162.58	1420	1040	1	0.74	1420	1040	1	0.74	-	-	12	7	2	TMT6plex	19779	Myosin regulatory light chain 12B OS=Mus musculus GN=Myl12b PE=1 SV=2
2380	1822	tr|Q3UW66|Q3UW66_MOUSE	4.26	162.55	506	586.823	1	1.16	506	586.823	1	1.16	-	-	12	2	2	TMT6plex	33097	Sulfurtransferase OS=Mus musculus GN=Mpst PE=1 SV=1
2380	1828	Q99J99|THTM_MOUSE	4.26	162.55	506	586.823	1	1.16	506	586.823	1	1.16	-	-	12	2	2	TMT6plex	33023	3-mercaptopyruvate sulfurtransferase OS=Mus musculus GN=Mpst PE=1 SV=3
1157	1588	Q3UHD9|AGAP2_MOUSE	1.23	162.53	2100	1880	1	0.9	2100	1880	1	0.9	-	-	4	7	5	TMT6plex; Deamidation (NQ)	124510	Arf-GAP with GTPase ANK repeat and PH domain-containing protein 2 OS=Mus musculus GN=Agap2 PE=1 SV=1
1734	1716	Q9DCZ1|GMPR1_MOUSE	1.26	162.45	1350	1420	1	1.05	1350	1420	1	1.05	-	-	10	6	3	Carbamidomethylation; TMT6plex	37482	GMP reductase 1 OS=Mus musculus GN=Gmpr PE=1 SV=1
1715	1953	O09061|PSB1_MOUSE	0.86	162.38	6210	6580	1	1.06	6210	6580	1	1.06	-	-	37	7	7	Carbamidomethylation; TMT6plex	26372	Proteasome subunit beta type-1 OS=Mus musculus GN=Psmb1 PE=1 SV=1
1224	2190	Q5M8N0|CNRP1_MOUSE	2.33	162.17	12900	14400	1	1.11	12900	14400	1	1.11	-	-	57	7	7	Carbamidomethylation; TMT6plex; Oxidation (M); Deamidation (NQ)	18612	CB1 cannabinoid receptor-interacting protein 1 OS=Mus musculus GN=Cnrip1 PE=1 SV=1
1285	1614	Q00PI9|HNRL2_MOUSE	1.07	162.17	2870	3030	1	1.05	2870	3030	1	1.05	-	-	3	6	3	Carbamidomethylation; TMT6plex	84940	Heterogeneous nuclear ribonucleoprotein U-like protein 2 OS=Mus musculus GN=Hnrnpul2 PE=1 SV=2
819	3976	P63044|VAMP2_MOUSE	2.04	161.99	2370	1880	1	0.8	2370	1880	1	0.8	-	-	14	4	1	TMT6plex	12691	Vesicle-associated membrane protein 2 OS=Mus musculus GN=Vamp2 PE=1 SV=2
819	3981	tr|B0QZN5|B0QZN5_MOUSE	2.04	161.99	2370	1880	1	0.8	2370	1880	1	0.8	-	-	10	4	1	TMT6plex	17862	Vesicle-associated membrane protein 2 OS=Mus musculus GN=Vamp2 PE=1 SV=1
1548	2022	Q99KH8|STK24_MOUSE	2.64	161.61	1450	1130	1	0.78	1450	1130	1	0.78	-	-	5	5	2	TMT6plex	47954	Serine/threonine-protein kinase 24 OS=Mus musculus GN=Stk24 PE=1 SV=1
1338	1839	tr|B1ATI9|B1ATI9_MOUSE	3.65	161.23	3800	3150	1	0.83	3800	3150	1	0.83	-	-	10	5	4	TMT6plex	47261	Growth arrest-specific protein 7 OS=Mus musculus GN=Gas7 PE=1 SV=1
1338	1840	tr|Q3U432|Q3U432_MOUSE	3.65	161.23	3800	3150	1	0.83	3800	3150	1	0.83	-	-	10	5	4	TMT6plex	47675	Growth arrest-specific protein 7 OS=Mus musculus GN=Gas7 PE=1 SV=1
1338	1841	Q60780|GAS7_MOUSE	3.65	161.23	3800	3150	1	0.83	3800	3150	1	0.83	-	-	10	5	4	TMT6plex	48174	Growth arrest-specific protein 7 OS=Mus musculus GN=Gas7 PE=1 SV=1
1158	1789	tr|F7CYX4|F7CYX4_MOUSE	1.7	161.13	241	297.292	1	1.23	241	297.292	1	1.23	-	-	1	7	1	TMT6plex	143246	Liprin-alpha-2 OS=Mus musculus GN=Ppfia2 PE=1 SV=1
1158	1790	tr|B8QI34|B8QI34_MOUSE	1.7	161.13	241	297.292	1	1.23	241	297.292	1	1.23	-	-	1	7	1	TMT6plex	143333	Liprin-alpha 2 OS=Mus musculus GN=Ppfia2 PE=1 SV=1
1158	1791	Q8BSS9|LIPA2_MOUSE	1.7	161.13	241	297.292	1	1.23	241	297.292	1	1.23	-	-	1	7	1	TMT6plex	143234	Liprin-alpha-2 OS=Mus musculus GN=Ppfia2 PE=1 SV=2
1441	1590	Q61137|ASTN1_MOUSE	2.37	160.96	1210	1040	1	0.85	1210	1040	1	0.85	-	-	3	4	3	Carbamidomethylation; TMT6plex	144883	Astrotactin-1 OS=Mus musculus GN=Astn1 PE=1 SV=4
1399	2016	Q8C0E2|VP26B_MOUSE	3.6	160.94	1660	1320	1	0.79	1660	1320	1	0.79	-	-	11	5	3	TMT6plex	39125	Vacuolar protein sorting-associated protein 26B OS=Mus musculus GN=Vps26b PE=1 SV=1
1352	1768	Q9R1P4|PSA1_MOUSE	1.68	160.93	7440	7820	1	1.05	7440	7820	1	1.05	-	-	25	6	6	Carbamidomethylation; TMT6plex; Deamidation (NQ)	29547	Proteasome subunit alpha type-1 OS=Mus musculus GN=Psma1 PE=1 SV=1
1296	1806	P70699|LYAG_MOUSE	2.07	160.88	1420	1540	1	1.09	1420	1540	1	1.09	-	-	4	4	3	TMT6plex	106248	Lysosomal alpha-glucosidase OS=Mus musculus GN=Gaa PE=1 SV=2
1417	2092	Q9WUL7|ARL3_MOUSE	1.71	160.78	807	736.663	1	0.91	807	736.663	1	0.91	-	-	12	4	2	Carbamidomethylation; TMT6plex	20487	ADP-ribosylation factor-like protein 3 OS=Mus musculus GN=Arl3 PE=1 SV=1
1069	2640	Q8R191|SNG3_MOUSE	2.62	160.65	7140	8860	1	1.24	7140	8860	1	1.24	-	-	8	2	2	TMT6plex	24561	Synaptogyrin-3 OS=Mus musculus GN=Syngr3 PE=1 SV=1
2403	3093	Q9D7X3|DUS3_MOUSE	3	160.57	1060	1220	1	1.15	1060	1220	1	1.15	-	-	18	4	2	Carbamidomethylation; TMT6plex; Deamidation (NQ)	20472	Dual specificity protein phosphatase 3 OS=Mus musculus GN=Dusp3 PE=1 SV=1
2403	3094	tr|B1AQF4|B1AQF4_MOUSE	3	160.57	1060	1220	1	1.15	1060	1220	1	1.15	-	-	16	4	2	Carbamidomethylation; TMT6plex; Deamidation (NQ)	23223	Dual-specificity protein phosphatase 3 OS=Mus musculus GN=Dusp3 PE=1 SV=1
1215	1603	P54728|RD23B_MOUSE	5.28	160.52	4420	3390	1	0.77	4420	3390	1	0.77	-	-	10	6	4	TMT6plex	43513	UV excision repair protein RAD23 homolog B OS=Mus musculus GN=Rad23b PE=1 SV=2
1863	1816	Q9D0E1|HNRPM_MOUSE	2.78	160.23	2270	1840	1	0.81	2270	1840	1	0.81	-	-	7	6	5	TMT6plex	77649	Heterogeneous nuclear ribonucleoprotein M OS=Mus musculus GN=Hnrnpm PE=1 SV=3
1615	1920	tr|D3YYT0|D3YYT0_MOUSE	2.19	160.23	2050	1830	1	0.89	2050	1830	1	0.89	-	-	10	5	4	TMT6plex	93857	Cadherin-2 OS=Mus musculus GN=Cdh2 PE=1 SV=1
1615	1928	P15116|CADH2_MOUSE	2.19	160.23	2050	1830	1	0.89	2050	1830	1	0.89	-	-	9	5	4	TMT6plex	99796	Cadherin-2 OS=Mus musculus GN=Cdh2 PE=1 SV=2
1556	1919	Q8K0E8|FIBB_MOUSE	3.03	160.21	1790	2200	1	1.22	1790	2200	1	1.22	-	-	9	6	4	Carbamidomethylation; TMT6plex	54753	Fibrinogen beta chain OS=Mus musculus GN=Fgb PE=1 SV=1
1617	1398	Q8K3H0|DP13A_MOUSE	2.44	160.21	2620	2910	1	1.11	2620	2910	1	1.11	-	-	10	8	6	Carbamidomethylation; TMT6plex	79328	DCC-interacting protein 13-alpha OS=Mus musculus GN=Appl1 PE=1 SV=1
924	1985	Q9D892|ITPA_MOUSE	2.02	160.15	3640	4260	1	1.17	3640	4260	1	1.17	-	-	24	4	4	TMT6plex	21897	Inosine triphosphate pyrophosphatase OS=Mus musculus GN=Itpa PE=1 SV=2
790	1325	tr|D3YYK8|D3YYK8_MOUSE	1.26	160.08	9960	9270	1	0.93	9960	9270	1	0.93	-	-	27	9	7	TMT6plex	29425	Microtubule-associated protein RP/EB family member 2 (Fragment) OS=Mus musculus GN=Mapre2 PE=1 SV=1
790	1328	tr|E9Q6X0|E9Q6X0_MOUSE	1.26	160.08	9960	9270	1	0.93	9960	9270	1	0.93	-	-	25	9	7	TMT6plex	32265	Microtubule-associated protein RP/EB family member 2 OS=Mus musculus GN=Mapre2 PE=1 SV=1
790	1330	Q8R001|MARE2_MOUSE	1.26	160.08	9960	9270	1	0.93	9960	9270	1	0.93	-	-	21	9	7	TMT6plex	36946	Microtubule-associated protein RP/EB family member 2 OS=Mus musculus GN=Mapre2 PE=1 SV=1
2007	2207	Q8CG76|ARK72_MOUSE	2.39	160.02	2410	2530	1	1.05	2410	2530	1	1.05	-	-	14	4	4	TMT6plex	40612	Aflatoxin B1 aldehyde reductase member 2 OS=Mus musculus GN=Akr7a2 PE=1 SV=3
719	1817	Q9CZY3|UB2V1_MOUSE	2.36	160.02	1390	1300	1	0.94	1390	1300	1	0.94	-	-	16	8	2	TMT6plex; Deamidation (NQ)	16355	Ubiquitin-conjugating enzyme E2 variant 1 OS=Mus musculus GN=Ube2v1 PE=1 SV=1
719	1837	tr|B7ZBY7|B7ZBY7_MOUSE	2.36	160.02	1390	1300	1	0.94	1390	1300	1	0.94	-	-	14	8	2	TMT6plex; Deamidation (NQ)	19339	Ubiquitin-conjugating enzyme E2 variant 1 OS=Mus musculus GN=Ube2v1 PE=3 SV=1
719	1868	tr|E9PY39|E9PY39_MOUSE	2.36	160.02	1390	1300	1	0.94	1390	1300	1	0.94	-	-	6	8	2	TMT6plex; Deamidation (NQ)	42096	Uncharacterized protein OS=Mus musculus GN=Gm20431 PE=3 SV=1
1165	1649	Q925N0|SFXN5_MOUSE	4.01	159.97	7440	7230	1	0.97	7440	7230	1	0.97	-	-	22	7	7	TMT6plex	37329	Sideroflexin-5 OS=Mus musculus GN=Sfxn5 PE=1 SV=2
918	1497	Q9WUM4|COR1C_MOUSE	2.33	159.88	5730	4810	1	0.84	5730	4810	1	0.84	-	-	14	10	6	Carbamidomethylation; TMT6plex	53121	Coronin-1C OS=Mus musculus GN=Coro1c PE=1 SV=2
1187	2994	P15864|H12_MOUSE	10.17	159.65	1040	485.338	1	0.47	1040	485.338	1	0.47	-	-	3	5	1	TMT6plex	21267	Histone H1.2 OS=Mus musculus GN=Hist1h1c PE=1 SV=2
1986	2353	Q6PDL0|DC1L2_MOUSE	2.38	159.47	461	368.928	1	0.8	461	368.928	1	0.8	-	-	1	2	1	TMT6plex	54219	Cytoplasmic dynein 1 light intermediate chain 2 OS=Mus musculus GN=Dync1li2 PE=1 SV=2
1022	1320	P49615|CDK5_MOUSE	2.71	159.37	8870	7910	1	0.89	8870	7910	1	0.89	-	-	34	11	8	Carbamidomethylation; TMT6plex	33288	Cyclin-dependent-like kinase 5 OS=Mus musculus GN=Cdk5 PE=1 SV=1
1583	1701	O54984|ASNA_MOUSE	2.91	159.37	1680	2010	1	1.19	1680	2010	1	1.19	-	-	13	6	4	TMT6plex	38823	ATPase Asna1 OS=Mus musculus GN=Asna1 PE=1 SV=2
1840	2806	P70670|NACAM_MOUSE	1.81	159.33	4210	3790	1	0.9	4210	3790	1	0.9	-	-	3	6	4	TMT6plex; Deamidation (NQ)	220497	Nascent polypeptide-associated complex subunit alpha muscle-specific form OS=Mus musculus GN=Naca PE=1 SV=2
1180	1546	Q8R050|ERF3A_MOUSE	1.48	159.12	2770	2460	1	0.89	2770	2460	1	0.89	-	-	8	8	5	Carbamidomethylation; TMT6plex	68626	Eukaryotic peptide chain release factor GTP-binding subunit ERF3A OS=Mus musculus GN=Gspt1 PE=1 SV=2
1487	1154	tr|E9QAN4|E9QAN4_MOUSE	1.62	159.12	279	328.334	1	1.18	279	328.334	1	1.18	-	-	1	5	1	TMT6plex	190975	Kinesin-like protein KIF1A OS=Mus musculus GN=Kif1a PE=1 SV=1
1487	1155	tr|G3UW47|G3UW47_MOUSE	1.62	159.12	279	328.334	1	1.18	279	328.334	1	1.18	-	-	1	5	1	TMT6plex	191852	Kinesin family member 1A OS=Mus musculus GN=Kif1a PE=1 SV=1
1487	1156	tr|Q6TA13|Q6TA13_MOUSE	1.62	159.12	279	328.334	1	1.18	279	328.334	1	1.18	-	-	1	5	1	TMT6plex	191809	Kinesin-like protein KIF1A OS=Mus musculus GN=Kif1a PE=1 SV=1
1487	1157	tr|E9Q9G6|E9Q9G6_MOUSE	1.62	159.12	279	328.334	1	1.18	279	328.334	1	1.18	-	-	1	5	1	TMT6plex	192047	Kinesin-like protein KIF1A OS=Mus musculus GN=Kif1a PE=1 SV=1
1487	1158	P33173|KIF1A_MOUSE	1.62	159.12	279	328.334	1	1.18	279	328.334	1	1.18	-	-	1	5	1	TMT6plex	191724	Kinesin-like protein KIF1A OS=Mus musculus GN=Kif1a PE=1 SV=2
1487	1162	tr|A0A087WQE8|A0A087WQE8_MOUSE	1.62	159.12	279	328.334	1	1.18	279	328.334	1	1.18	-	-	1	5	1	TMT6plex	202173	Kinesin-like protein KIF1A OS=Mus musculus GN=Kif1a PE=1 SV=1
294	3360	Q9D6P8|CALL3_MOUSE	1.56	158.95	1100	1130	1	1.02	1100	1130	1	1.02	-	-	13	8	2	TMT6plex; Deamidation (NQ)	16701	Calmodulin-like protein 3 OS=Mus musculus GN=Calml3 PE=2 SV=1
997	2424	Q62048|PEA15_MOUSE	2.09	158.93	22600	20600	1	0.91	22600	20600	1	0.91	-	-	65	8	7	Carbamidomethylation; TMT6plex; Oxidation (M)	15054	Astrocytic phosphoprotein PEA-15 OS=Mus musculus GN=Pea15 PE=1 SV=1
901	1989	Q9WTX5|SKP1_MOUSE	1.88	158.91	14500	13200	1	0.91	14500	13200	1	0.91	-	-	30	6	5	Carbamidomethylation; TMT6plex	18672	S-phase kinase-associated protein 1 OS=Mus musculus GN=Skp1 PE=1 SV=3
1964	1831	Q9QZ06|TOLIP_MOUSE	2.22	158.87	2820	2520	1	0.89	2820	2520	1	0.89	-	-	13	4	4	Carbamidomethylation; TMT6plex	30345	Toll-interacting protein OS=Mus musculus GN=Tollip PE=1 SV=1
1534	2420	Q8VED9|LEGL_MOUSE	1.59	158.83	5580	6200	1	1.11	5580	6200	1	1.11	-	-	34	6	6	Carbamidomethylation; TMT6plex; Deamidation (NQ)	18956	Galectin-related protein OS=Mus musculus GN=Lgalsl PE=1 SV=1
1068	1866	Q7TMF3|NDUAC_MOUSE	4.33	158.8	5030	4560	1	0.91	5030	4560	1	0.91	-	-	48	9	6	Carbamidomethylation; TMT6plex	17086	NADH dehydrogenase [ubiquinone] 1 alpha subcomplex subunit 12 OS=Mus musculus GN=Ndufa12 PE=1 SV=2
1068	1869	tr|A0A0R4J275|A0A0R4J275_MOUSE	4.33	158.8	5030	4560	1	0.91	5030	4560	1	0.91	-	-	46	9	6	Carbamidomethylation; TMT6plex	17633	NADH dehydrogenase [ubiquinone] 1 alpha subcomplex subunit 12 OS=Mus musculus GN=Ndufa12 PE=1 SV=1
1200	1528	tr|E9Q175|E9Q175_MOUSE	2.07	158.71	3200	2720	1	0.85	3200	2720	1	0.85	-	-	7	13	8	TMT6plex	144773	Unconventional myosin-VI OS=Mus musculus GN=Myo6 PE=1 SV=1
1200	1530	tr|E9Q3L1|E9Q3L1_MOUSE	2.07	158.71	3200	2720	1	0.85	3200	2720	1	0.85	-	-	7	13	8	TMT6plex	145805	Unconventional myosin-VI OS=Mus musculus GN=Myo6 PE=1 SV=1
1200	1532	tr|E9PVU0|E9PVU0_MOUSE	2.07	158.71	3200	2720	1	0.85	3200	2720	1	0.85	-	-	7	13	8	TMT6plex	146307	Unconventional myosin-VI OS=Mus musculus GN=Myo6 PE=1 SV=1
1200	1533	tr|V9GXM4|V9GXM4_MOUSE	2.07	158.71	3200	2720	1	0.85	3200	2720	1	0.85	-	-	6	13	8	TMT6plex	148423	Unconventional myosin-VI OS=Mus musculus GN=Myo6 PE=1 SV=1
1200	1534	tr|E9Q174|E9Q174_MOUSE	2.07	158.71	3200	2720	1	0.85	3200	2720	1	0.85	-	-	6	13	8	TMT6plex	148145	Unconventional myosin-VI OS=Mus musculus GN=Myo6 PE=1 SV=1
1200	1535	tr|V9GX76|V9GX76_MOUSE	2.07	158.71	3200	2720	1	0.85	3200	2720	1	0.85	-	-	6	13	8	TMT6plex	149229	Unconventional myosin-VI OS=Mus musculus GN=Myo6 PE=1 SV=1
765	1799	Q9JM76|ARPC3_MOUSE	1.74	158.67	18100	16900	1	0.93	18100	16900	1	0.93	-	-	35	9	8	Carbamidomethylation; TMT6plex; Oxidation (M)	20525	Actin-related protein 2/3 complex subunit 3 OS=Mus musculus GN=Arpc3 PE=1 SV=3
1801	1977	P42125|ECI1_MOUSE	0.29	158.66	1650	1610	1	0.98	1650	1610	1	0.98	-	-	11	5	3	TMT6plex	32250	Enoyl-CoA delta isomerase 1 mitochondrial OS=Mus musculus GN=Eci1 PE=1 SV=2
1466	1405	Q9QYF9|NDRG3_MOUSE	2.76	158.6	3920	3620	1	0.92	3920	3620	1	0.92	-	-	11	5	3	Carbamidomethylation; TMT6plex	41555	Protein NDRG3 OS=Mus musculus GN=Ndrg3 PE=1 SV=1
1466	1406	tr|Q8VCV2|Q8VCV2_MOUSE	2.76	158.6	3920	3620	1	0.92	3920	3620	1	0.92	-	-	10	5	3	Carbamidomethylation; TMT6plex	42983	Ndrg3 protein OS=Mus musculus GN=Ndrg3 PE=1 SV=1
2280	2801	tr|A0A140T8J4|A0A140T8J4_MOUSE	2.31	158.44	3160	3720	1	1.18	3160	3720	1	1.18	-	-	27	4	4	TMT6plex	21053	Heme binding protein 1 OS=Mus musculus GN=Hebp1 PE=1 SV=1
2280	2811	Q9R257|HEBP1_MOUSE	2.31	158.44	3160	3720	1	1.18	3160	3720	1	1.18	-	-	27	4	4	TMT6plex	21067	Heme-binding protein 1 OS=Mus musculus GN=Hebp1 PE=1 SV=2
1221	1986	P97370|AT1B3_MOUSE	1.46	158.4	3780	3680	1	0.97	3780	3680	1	0.97	-	-	16	6	4	Carbamidomethylation; TMT6plex	31776	Sodium/potassium-transporting ATPase subunit beta-3 OS=Mus musculus GN=Atp1b3 PE=1 SV=1
767	2504	Q3TMH2|SCRN3_MOUSE	2.82	158.27	595	651.893	1	1.1	595	651.893	1	1.1	-	-	5	5	2	TMT6plex	47661	Secernin-3 OS=Mus musculus GN=Scrn3 PE=1 SV=1
1032	1729	P07758|A1AT1_MOUSE	3.54	158.25	3090	4130	1	1.34	3090	4130	1	1.34	-	-	5	6	2	TMT6plex	46003	Alpha-1-antitrypsin 1-1 OS=Mus musculus GN=Serpina1a PE=1 SV=4
1032	1740	tr|A0A0A0MQA3|A0A0A0MQA3_MOUSE	3.54	158.25	3090	4130	1	1.34	3090	4130	1	1.34	-	-	5	6	2	TMT6plex	48796	Alpha-1-antitrypsin 1-1 OS=Mus musculus GN=Serpina1a PE=1 SV=1
1567	1128	Q8BHL5|ELMO2_MOUSE	2.81	158.12	1160	1070	1	0.92	1160	1070	1	0.92	-	-	5	8	3	TMT6plex	83887	Engulfment and cell motility protein 2 OS=Mus musculus GN=Elmo2 PE=1 SV=1
1359	2824	Q9CQR4|ACO13_MOUSE	5.6	158.11	12600	17100	1	1.36	12600	17100	1	1.36	-	-	46	6	6	Carbamidomethylation; TMT6plex	15183	Acyl-coenzyme A thioesterase 13 OS=Mus musculus GN=Acot13 PE=1 SV=1
1040	1859	Q9ET01|PYGL_MOUSE	1.86	158.08	253	279.98	1	1.11	253	279.98	1	1.11	-	-	2	10	1	TMT6plex; Deamidation (NQ)	97463	Glycogen phosphorylase liver form OS=Mus musculus GN=Pygl PE=1 SV=4
1585	2666	Q8VHW2|CCG8_MOUSE	2.93	158.02	5340	5470	1	1.02	5340	5470	1	1.02	-	-	18	6	5	Carbamidomethylation; TMT6plex; Deamidation (NQ)	43453	Voltage-dependent calcium channel gamma-8 subunit OS=Mus musculus GN=Cacng8 PE=1 SV=1
1585	2667	tr|F7CZ64|F7CZ64_MOUSE	2.93	158.02	5340	5470	1	1.02	5340	5470	1	1.02	-	-	18	6	5	Carbamidomethylation; TMT6plex; Deamidation (NQ)	43419	Multifunctional fusion protein OS=Mus musculus GN=Cacng8 PE=1 SV=2
1569	3122	Q9JKC6|CEND_MOUSE	0.8	158	3120	2990	1	0.96	3120	2990	1	0.96	-	-	25	4	4	TMT6plex	14987	Cell cycle exit and neuronal differentiation protein 1 OS=Mus musculus GN=Cend1 PE=1 SV=1
1589	1409	O08919|NUMBL_MOUSE	3.12	157.85	1080	1070	1	0.99	1080	1070	1	0.99	-	-	7	7	3	Carbamidomethylation; TMT6plex	64130	Numb-like protein OS=Mus musculus GN=Numbl PE=1 SV=3
1451	1674	P14869|RLA0_MOUSE	2.02	157.78	8560	7340	1	0.86	8560	7340	1	0.86	-	-	38	9	9	Carbamidomethylation; TMT6plex	34216	60S acidic ribosomal protein P0 OS=Mus musculus GN=Rplp0 PE=1 SV=3
2058	2405	Q91Z67|SRGP2_MOUSE	3.09	157.27	735	814.269	1	1.11	735	814.269	1	1.11	-	-	2	3	2	TMT6plex; Deamidation (NQ)	120798	SLIT-ROBO Rho GTPase-activating protein 2 OS=Mus musculus GN=Srgap2 PE=1 SV=2
3363	4143	Q9D1X0|NOL3_MOUSE	3.31	157.24	291	388.032	1	1.33	291	388.032	1	1.33	-	-	4	1	1	TMT6plex	24568	Nucleolar protein 3 OS=Mus musculus GN=Nol3 PE=1 SV=1
2103	1423	Q9ER72|SYCC_MOUSE	4.76	157.22	811	764.721	1	0.94	811	764.721	1	0.94	-	-	4	3	3	TMT6plex	94860	Cysteine--tRNA ligase cytoplasmic OS=Mus musculus GN=Cars PE=1 SV=2
2124	2394	tr|Q3USC7|Q3USC7_MOUSE	5.24	157.17	2840	2380	1	0.84	2840	2380	1	0.84	-	-	13	5	5	TMT6plex	41920	Ganglioside-induced differentiation-associated protein 1-like 1 OS=Mus musculus GN=Gdap1l1 PE=1 SV=1
2124	2395	Q8VE33|GD1L1_MOUSE	5.24	157.17	2840	2380	1	0.84	2840	2380	1	0.84	-	-	13	5	5	TMT6plex	42318	Ganglioside-induced differentiation-associated protein 1-like 1 OS=Mus musculus GN=Gdap1l1 PE=1 SV=1
285	3131	tr|V9GX06|V9GX06_MOUSE	2.4	157.12	266	362.959	1	1.36	266	362.959	1	1.36	-	-	13	5	1	TMT6plex; Oxidation (M); Deamidation (NQ)	19865	Uncharacterized protein (Fragment) OS=Mus musculus GN=Gm11214 PE=1 SV=1
1258	1752	Q9DCJ5|NDUA8_MOUSE	5.57	157.08	12100	13400	1	1.11	12100	13400	1	1.11	-	-	44	8	7	Carbamidomethylation; TMT6plex; Deamidation (NQ)	19992	NADH dehydrogenase [ubiquinone] 1 alpha subcomplex subunit 8 OS=Mus musculus GN=Ndufa8 PE=1 SV=3
671	1711	Q9CXZ1|NDUS4_MOUSE	2.53	156.86	12200	12000	1	0.98	12200	12000	1	0.98	-	-	29	6	5	TMT6plex	19785	NADH dehydrogenase [ubiquinone] iron-sulfur protein 4 mitochondrial OS=Mus musculus GN=Ndufs4 PE=1 SV=3
671	1756	tr|E9QPX3|E9QPX3_MOUSE	2.53	156.86	12200	12000	1	0.98	12200	12000	1	0.98	-	-	29	6	5	TMT6plex	19803	NADH dehydrogenase [ubiquinone] iron-sulfur protein 4 mitochondrial OS=Mus musculus GN=Ndufs4 PE=1 SV=1
972	1777	Q78PY7|SND1_MOUSE	2.89	156.69	3410	2970	1	0.87	3410	2970	1	0.87	-	-	9	12	9	Carbamidomethylation; TMT6plex	102088	Staphylococcal nuclease domain-containing protein 1 OS=Mus musculus GN=Snd1 PE=1 SV=1
1188	2102	Q9WTL7|LYPA2_MOUSE	1.82	156.69	5140	5210	1	1.01	5140	5210	1	1.01	-	-	23	7	5	Carbamidomethylation; TMT6plex; Deamidation (NQ)	24794	Acyl-protein thioesterase 2 OS=Mus musculus GN=Lypla2 PE=1 SV=1
1855	2629	P50171|DHB8_MOUSE	1.9	156.65	279	244.758	1	0.88	279	244.758	1	0.88	-	-	5	2	1	TMT6plex	26588	Estradiol 17-beta-dehydrogenase 8 OS=Mus musculus GN=Hsd17b8 PE=1 SV=2
2158	1880	tr|D3Z2Q2|D3Z2Q2_MOUSE	2.1	156.61	2000	1970	1	0.99	2000	1970	1	0.99	-	-	6	5	4	Carbamidomethylation; TMT6plex	121707	Syntaxin-binding protein 5 OS=Mus musculus GN=Stxbp5 PE=1 SV=1
2158	1881	tr|D3Z079|D3Z079_MOUSE	2.1	156.61	2000	1970	1	0.99	2000	1970	1	0.99	-	-	6	5	4	Carbamidomethylation; TMT6plex	123602	Syntaxin-binding protein 5 OS=Mus musculus GN=Stxbp5 PE=1 SV=1
2158	1887	Q8K400|STXB5_MOUSE	2.1	156.61	2000	1970	1	0.99	2000	1970	1	0.99	-	-	6	5	4	Carbamidomethylation; TMT6plex	127650	Syntaxin-binding protein 5 OS=Mus musculus GN=Stxbp5 PE=1 SV=3
995	2014	P63321|RALA_MOUSE	2.32	156.52	2640	3000	1	1.13	2640	3000	1	1.13	-	-	17	7	3	TMT6plex; Deamidation (NQ)	23553	Ras-related protein Ral-A OS=Mus musculus GN=Rala PE=1 SV=1
1142	3205	P60904|DNJC5_MOUSE	3.48	156.51	8840	7520	1	0.85	8840	7520	1	0.85	-	-	16	5	4	TMT6plex; Deamidation (NQ)	22101	DnaJ homolog subfamily C member 5 OS=Mus musculus GN=Dnajc5 PE=1 SV=1
425	1827	Q6PHN9|RAB35_MOUSE	1.81	156.4	4540	3940	1	0.87	4540	3940	1	0.87	-	-	19	8	4	TMT6plex	23025	Ras-related protein Rab-35 OS=Mus musculus GN=Rab35 PE=1 SV=1
1052	1730	P28658|ATX10_MOUSE	4.34	156.4	2920	2570	1	0.88	2920	2570	1	0.88	-	-	14	11	6	Carbamidomethylation; TMT6plex	53707	Ataxin-10 OS=Mus musculus GN=Atxn10 PE=1 SV=2
1706	1515	Q8JZN5|ACAD9_MOUSE	0.98	156.25	1540	1410	1	0.91	1540	1410	1	0.91	-	-	5	5	3	TMT6plex; Deamidation (NQ)	68722	Acyl-CoA dehydrogenase family member 9 mitochondrial OS=Mus musculus GN=Acad9 PE=1 SV=2
1092	1346	P14148|RL7_MOUSE	8.71	156.2	8010	4960	1	0.62	8010	4960	1	0.62	-	-	37	11	10	Carbamidomethylation; TMT6plex; Deamidation (NQ)	31420	60S ribosomal protein L7 OS=Mus musculus GN=Rpl7 PE=1 SV=2
2231	1645	P36916|GNL1_MOUSE	2.11	156.15	1550	1740	1	1.13	1550	1740	1	1.13	-	-	7	4	4	Carbamidomethylation; TMT6plex	68771	Guanine nucleotide-binding protein-like 1 OS=Mus musculus GN=Gnl1 PE=1 SV=4
1800	1745	P17563|SBP1_MOUSE	2.96	156.03	266	311.619	1	1.17	266	311.619	1	1.17	-	-	4	5	1	TMT6plex; Deamidation (NQ)	52514	Selenium-binding protein 1 OS=Mus musculus GN=Selenbp1 PE=1 SV=2
716	2864	Q3V132|ADT4_MOUSE	0.98	155.79	1210	1160	1	0.96	1210	1160	1	0.96	-	-	5	7	2	TMT6plex	35258	ADP/ATP translocase 4 OS=Mus musculus GN=Slc25a31 PE=1 SV=1
1029	2386	Q9CQ75|NDUA2_MOUSE	8.63	155.64	2880	4050	1	1.41	2880	4050	1	1.41	-	-	30	5	3	TMT6plex	10916	NADH dehydrogenase [ubiquinone] 1 alpha subcomplex subunit 2 OS=Mus musculus GN=Ndufa2 PE=1 SV=3
1389	1567	Q99K48|NONO_MOUSE	2.29	155.56	5120	4250	1	0.83	5120	4250	1	0.83	-	-	11	8	7	TMT6plex	54541	Non-POU domain-containing octamer-binding protein OS=Mus musculus GN=Nono PE=1 SV=3
2365	1915	Q8BKC5|IPO5_MOUSE	0.54	155.45	697	667.414	1	0.96	697	667.414	1	0.96	-	-	1	2	1	TMT6plex	123591	Importin-5 OS=Mus musculus GN=Ipo5 PE=1 SV=3
1345	3578	Q9DAS9|GBG12_MOUSE	2.48	155.34	6610	7160	1	1.08	6610	7160	1	1.08	-	-	54	4	4	Carbamidomethylation; TMT6plex; Deamidation (NQ)	7997	Guanine nucleotide-binding protein G(I)/G(S)/G(O) subunit gamma-12 OS=Mus musculus GN=Gng12 PE=1 SV=3
1345	3579	tr|A0A0N4SW28|A0A0N4SW28_MOUSE	2.48	155.34	6610	7160	1	1.08	6610	7160	1	1.08	-	-	47	4	4	Carbamidomethylation; TMT6plex; Deamidation (NQ)	9182	Guanine nucleotide-binding protein subunit gamma OS=Mus musculus GN=Gng12 PE=1 SV=1
637	2026	Q9CQI3|GMFB_MOUSE	2.24	155.28	19800	17200	1	0.87	19800	17200	1	0.87	-	-	41	7	5	Carbamidomethylation; TMT6plex; Oxidation (M)	16723	Glia maturation factor beta OS=Mus musculus GN=Gmfb PE=1 SV=3
733	1430	tr|A2AIM4|A2AIM4_MOUSE	14.18	155.26	862	835.163	1	0.97	862	835.163	1	0.97	-	-	10	11	3	TMT6plex; Deamidation (NQ)	32994	Tropomyosin beta chain OS=Mus musculus GN=Tpm2 PE=1 SV=1
1168	1382	Q9ESJ4|SPN90_MOUSE	2.55	155.18	2570	2690	1	1.05	2570	2690	1	1.05	-	-	6	5	4	Carbamidomethylation; TMT6plex	78572	NCK-interacting protein with SH3 domain OS=Mus musculus GN=Nckipsd PE=1 SV=2
1184	1574	Q9WUM3|COR1B_MOUSE	1.4	155.17	8160	7470	1	0.92	8160	7470	1	0.92	-	-	17	9	8	Carbamidomethylation; TMT6plex	53912	Coronin-1B OS=Mus musculus GN=Coro1b PE=1 SV=1
1641	1627	P35293|RAB18_MOUSE	3.17	155.07	981	806.509	1	0.82	981	806.509	1	0.82	-	-	13	5	2	Carbamidomethylation; TMT6plex	23035	Ras-related protein Rab-18 OS=Mus musculus GN=Rab18 PE=1 SV=2
698	3077	Q06185|ATP5I_MOUSE	2.29	154.95	19800	19700	1	1	19800	19700	1	1	-	-	61	6	4	TMT6plex	8236	ATP synthase subunit e mitochondrial OS=Mus musculus GN=Atp5i PE=1 SV=2
2416	2478	O70252|HMOX2_MOUSE	2.05	154.84	1270	1190	1	0.94	1270	1190	1	0.94	-	-	15	3	3	TMT6plex	35739	Heme oxygenase 2 OS=Mus musculus GN=Hmox2 PE=1 SV=1
2841	2903	O08547|SC22B_MOUSE	6.29	154.78	701	801.136	1	1.14	701	801.136	1	1.14	-	-	13	3	2	TMT6plex	24741	Vesicle-trafficking protein SEC22b OS=Mus musculus GN=Sec22b PE=1 SV=3
1378	1652	tr|A2AE27|A2AE27_MOUSE	12.78	154.69	2330	2470	1	1.06	2330	2470	1	1.06	-	-	5	6	5	Carbamidomethylation; TMT6plex; Deamidation (NQ)	94696	AMP deaminase OS=Mus musculus GN=Ampd2 PE=1 SV=1
2115	2254	P70372|ELAV1_MOUSE	2.2	154.46	854	639.357	1	0.75	854	639.357	1	0.75	-	-	2	1	1	TMT6plex	36169	ELAV-like protein 1 OS=Mus musculus GN=Elavl1 PE=1 SV=2
1351	1660	Q8BL65|ABLM2_MOUSE	4.04	154.32	1850	2050	1	1.11	1850	2050	1	1.11	-	-	6	7	4	TMT6plex	68107	Actin-binding LIM protein 2 OS=Mus musculus GN=Ablim2 PE=1 SV=1
1351	1663	tr|E9Q4K0|E9Q4K0_MOUSE	4.04	154.32	1850	2050	1	1.11	1850	2050	1	1.11	-	-	6	7	4	TMT6plex	73650	Actin-binding LIM protein 2 OS=Mus musculus GN=Ablim2 PE=1 SV=1
591	2654	P10639|THIO_MOUSE	2.2	154.15	29300	25700	1	0.88	29300	25700	1	0.88	-	-	41	5	5	Carbamidomethylation; TMT6plex; Oxidation (M)	11675	Thioredoxin OS=Mus musculus GN=Txn PE=1 SV=3
883	1408	P28740|KIF2A_MOUSE	1.59	154.09	2960	2730	1	0.92	2960	2730	1	0.92	-	-	8	9	6	Carbamidomethylation; TMT6plex	79756	Kinesin-like protein KIF2A OS=Mus musculus GN=Kif2a PE=1 SV=2
883	1416	tr|E0CZ72|E0CZ72_MOUSE	1.59	154.09	2960	2730	1	0.92	2960	2730	1	0.92	-	-	8	9	6	Carbamidomethylation; TMT6plex	83861	Kinesin-like protein OS=Mus musculus GN=Kif2a PE=1 SV=1
1568	1504	Q9DAW9|CNN3_MOUSE	5.95	154.09	1970	1540	1	0.78	1970	1540	1	0.78	-	-	14	4	3	Carbamidomethylation; TMT6plex; Deamidation (NQ)	36429	Calponin-3 OS=Mus musculus GN=Cnn3 PE=1 SV=1
1653	2077	Q80UW2|FBX2_MOUSE	2.62	154.04	4090	3840	1	0.94	4090	3840	1	0.94	-	-	23	7	6	Carbamidomethylation; TMT6plex	33676	F-box only protein 2 OS=Mus musculus GN=Fbxo2 PE=1 SV=1
1574	2138	P62754|RS6_MOUSE	7.72	153.95	2460	1600	1	0.65	2460	1600	1	0.65	-	-	14	5	3	Carbamidomethylation; TMT6plex	28681	40S ribosomal protein S6 OS=Mus musculus GN=Rps6 PE=1 SV=1
763	3481	Q3V3I2|GNAT3_MOUSE	1.27	153.73	478	468.026	1	0.98	478	468.026	1	0.98	-	-	2	5	1	TMT6plex	40316	Guanine nucleotide-binding protein G(t) subunit alpha-3 OS=Mus musculus GN=Gnat3 PE=1 SV=2
2021	3154	Q9JJU8|SH3L1_MOUSE	4.19	153.67	6180	4740	1	0.77	6180	4740	1	0.77	-	-	52	5	5	Carbamidomethylation; TMT6plex	12811	SH3 domain-binding glutamic acid-rich-like protein OS=Mus musculus GN=Sh3bgrl PE=1 SV=1
2241	1826	P60122|RUVB1_MOUSE	2.16	153.67	1010	825.612	1	0.82	1010	825.612	1	0.82	-	-	6	2	2	TMT6plex	50214	RuvB-like 1 OS=Mus musculus GN=Ruvbl1 PE=1 SV=1
1462	1971	P46664|PURA2_MOUSE	2.74	153.57	3150	3190	1	1.01	3150	3190	1	1.01	-	-	11	5	5	TMT6plex	50021	Adenylosuccinate synthetase isozyme 2 OS=Mus musculus GN=Adss PE=1 SV=2
1698	2025	Q61425|HCDH_MOUSE	0.9	153.36	3390	3560	1	1.05	3390	3560	1	1.05	-	-	14	7	5	Carbamidomethylation; TMT6plex	34464	Hydroxyacyl-coenzyme A dehydrogenase mitochondrial OS=Mus musculus GN=Hadh PE=1 SV=2
1896	1421	Q3ULD5|MCCB_MOUSE	2.96	153.3	1120	961.721	1	0.86	1120	961.721	1	0.86	-	-	6	3	3	TMT6plex; Deamidation (NQ)	61379	Methylcrotonoyl-CoA carboxylase beta chain mitochondrial OS=Mus musculus GN=Mccc2 PE=1 SV=1
3268	2849	Q9EPL2|CSTN1_MOUSE	3.08	152.92	1520	1440	1	0.94	1520	1440	1	0.94	-	-	3	3	3	TMT6plex	108900	Calsyntenin-1 OS=Mus musculus GN=Clstn1 PE=1 SV=1
2173	2411	tr|G3UXM5|G3UXM5_MOUSE	4.53	152.89	222	200.582	1	0.9	222	200.582	1	0.9	-	-	2	6	1	TMT6plex	68834	Serine/threonine-protein kinase BRSK2 (Fragment) OS=Mus musculus GN=Brsk2 PE=1 SV=1
2173	2423	tr|G3UWV4|G3UWV4_MOUSE	4.53	152.89	222	200.582	1	0.9	222	200.582	1	0.9	-	-	2	6	1	TMT6plex	77778	Serine/threonine-protein kinase BRSK2 OS=Mus musculus GN=Brsk2 PE=1 SV=1
2173	2433	Q69Z98|BRSK2_MOUSE	4.53	152.89	222	200.582	1	0.9	222	200.582	1	0.9	-	-	2	6	1	TMT6plex	81734	Serine/threonine-protein kinase BRSK2 OS=Mus musculus GN=Brsk2 PE=1 SV=2
2476	2404	Q3UJU9|RMD3_MOUSE	2.07	152.89	279	306.843	1	1.1	279	306.843	1	1.1	-	-	4	2	1	TMT6plex	52029	Regulator of microtubule dynamics protein 3 OS=Mus musculus GN=Rmdn3 PE=1 SV=2
1572	1988	tr|A0A1W2P6P1|A0A1W2P6P1_MOUSE	3.78	152.77	2010	1810	1	0.9	2010	1810	1	0.9	-	-	15	4	3	TMT6plex	23214	Small glutamine-rich tetratricopeptide repeat-containing protein alpha (Fragment) OS=Mus musculus GN=Sgta PE=1 SV=1
1572	1995	Q8BJU0|SGTA_MOUSE	3.78	152.77	2010	1810	1	0.9	2010	1810	1	0.9	-	-	10	4	3	TMT6plex	34322	Small glutamine-rich tetratricopeptide repeat-containing protein alpha OS=Mus musculus GN=Sgta PE=1 SV=2
855	1476	Q9QUR6|PPCE_MOUSE	3.18	152.62	3060	2510	1	0.82	3060	2510	1	0.82	-	-	10	8	7	Carbamidomethylation; TMT6plex	80752	Prolyl endopeptidase OS=Mus musculus GN=Prep PE=1 SV=1
1405	1993	tr|E9Q1S3|E9Q1S3_MOUSE	4.4	152.59	1660	1450	1	0.87	1660	1450	1	0.87	-	-	3	5	3	TMT6plex	82956	Protein transport protein Sec23A OS=Mus musculus GN=Sec23a PE=1 SV=1
1405	2004	Q01405|SC23A_MOUSE	4.4	152.59	1660	1450	1	0.87	1660	1450	1	0.87	-	-	3	5	3	TMT6plex	86162	Protein transport protein Sec23A OS=Mus musculus GN=Sec23a PE=1 SV=2
2543	1854	Q99KC8|VMA5A_MOUSE	1.76	152.56	254	280.577	1	1.1	254	280.577	1	1.1	-	-	1	2	1	TMT6plex	87143	von Willebrand factor A domain-containing protein 5A OS=Mus musculus GN=Vwa5a PE=1 SV=2
835	2024	Q9ERS2|NDUAD_MOUSE	3.59	152.55	6530	6460	1	0.99	6530	6460	1	0.99	-	-	35	6	5	TMT6plex	16860	NADH dehydrogenase [ubiquinone] 1 alpha subcomplex subunit 13 OS=Mus musculus GN=Ndufa13 PE=1 SV=3
974	1959	Q8CIE6|COPA_MOUSE	0.99	152.54	1620	1550	1	0.96	1620	1550	1	0.96	-	-	3	8	3	TMT6plex	138432	Coatomer subunit alpha OS=Mus musculus GN=Copa PE=1 SV=2
974	1960	tr|F8WHL2|F8WHL2_MOUSE	0.99	152.54	1620	1550	1	0.96	1620	1550	1	0.96	-	-	3	8	3	TMT6plex	139410	Coatomer subunit alpha OS=Mus musculus GN=Copa PE=1 SV=1
1658	2311	tr|Q99JZ4|Q99JZ4_MOUSE	1.27	152.52	1120	1250	1	1.12	1120	1250	1	1.12	-	-	16	5	2	Carbamidomethylation; TMT6plex; Deamidation (NQ)	22399	GTP-binding protein SAR1a OS=Mus musculus GN=Sar1a PE=1 SV=1
1513	1833	tr|Q3TA40|Q3TA40_MOUSE	2.33	152.52	1670	1380	1	0.83	1670	1380	1	0.83	-	-	8	3	3	TMT6plex	45218	Putative uncharacterized protein OS=Mus musculus GN=6430548M08Rik PE=1 SV=1
1513	1834	Q8R0A7|K0513_MOUSE	2.33	152.52	1670	1380	1	0.83	1670	1380	1	0.83	-	-	8	3	3	TMT6plex	46318	Uncharacterized protein KIAA0513 OS=Mus musculus GN=Kiaa0513 PE=1 SV=1
652	1921	Q9D2M8|UB2V2_MOUSE	0.69	152.45	5170	5120	1	0.99	5170	5120	1	0.99	-	-	5	7	1	TMT6plex	16367	Ubiquitin-conjugating enzyme E2 variant 2 OS=Mus musculus GN=Ube2v2 PE=1 SV=4
1866	2217	E9PV24|FIBA_MOUSE	1.61	152.34	703	815.463	1	1.16	703	815.463	1	1.16	-	-	2	4	2	TMT6plex	87429	Fibrinogen alpha chain OS=Mus musculus GN=Fga PE=1 SV=1
564	3089	P63040|CPLX1_MOUSE	3.21	152.08	16000	14000	1	0.87	16000	14000	1	0.87	-	-	25	5	2	TMT6plex; Oxidation (M)	15122	Complexin-1 OS=Mus musculus GN=Cplx1 PE=1 SV=1
2943	1672	O55137|ACOT1_MOUSE	0.92	151.74	329	325.947	1	0.99	329	325.947	1	0.99	-	-	3	2	1	Carbamidomethylation; TMT6plex	46136	Acyl-coenzyme A thioesterase 1 OS=Mus musculus GN=Acot1 PE=1 SV=1
890	3002	Q9D3D9|ATPD_MOUSE	1.42	151.68	20600	22300	1	1.08	20600	22300	1	1.08	-	-	34	5	4	TMT6plex	17600	ATP synthase subunit delta mitochondrial OS=Mus musculus GN=Atp5d PE=1 SV=1
2273	1980	Q3TDK6|ROGDI_MOUSE	2.3	151.57	2920	2820	1	0.97	2920	2820	1	0.97	-	-	17	5	5	Carbamidomethylation; TMT6plex	32100	Protein rogdi homolog OS=Mus musculus GN=Rogdi PE=1 SV=2
2104	2136	Q91XU3|PI42C_MOUSE	1.86	151.52	2950	3040	1	1.03	2950	3040	1	1.03	-	-	11	8	5	Carbamidomethylation; TMT6plex	47336	Phosphatidylinositol 5-phosphate 4-kinase type-2 gamma OS=Mus musculus GN=Pip4k2c PE=1 SV=1
1304	2622	Q99L43|CDS2_MOUSE	6.09	151.33	3030	2110	1	0.7	3030	2110	1	0.7	-	-	16	5	4	TMT6plex	51314	Phosphatidate cytidylyltransferase 2 OS=Mus musculus GN=Cds2 PE=1 SV=1
1139	2288	tr|A0A0G2JGP4|A0A0G2JGP4_MOUSE	2.86	151.3	279	315.201	1	1.13	279	315.201	1	1.13	-	-	8	7	1	Carbamidomethylation; TMT6plex	20586	GTPase NRas (Fragment) OS=Mus musculus GN=Nras PE=1 SV=1
1139	2289	tr|Q9D091|Q9D091_MOUSE	2.86	151.3	279	315.201	1	1.13	279	315.201	1	1.13	-	-	8	7	1	Carbamidomethylation; TMT6plex	21243	GTPase NRas OS=Mus musculus GN=Nras PE=1 SV=1
1139	2290	P08556|RASN_MOUSE	2.86	151.3	279	315.201	1	1.13	279	315.201	1	1.13	-	-	8	7	1	Carbamidomethylation; TMT6plex	21199	GTPase NRas OS=Mus musculus GN=Nras PE=1 SV=1
1877	1689	Q505F5|LRC47_MOUSE	0.88	151.24	1070	980.227	1	0.92	1070	980.227	1	0.92	-	-	2	2	1	TMT6plex	63590	Leucine-rich repeat-containing protein 47 OS=Mus musculus GN=Lrrc47 PE=1 SV=1
1877	1690	tr|E9PV22|E9PV22_MOUSE	0.88	151.24	1070	980.227	1	0.92	1070	980.227	1	0.92	-	-	2	2	1	TMT6plex	65904	Leucine-rich repeat-containing protein 47 OS=Mus musculus GN=Lrrc47 PE=1 SV=1
1037	2608	Q3UQ44|IQGA2_MOUSE	2.85	151.07	215	244.161	1	1.14	215	244.161	1	1.14	-	-	0	8	1	TMT6plex	180527	Ras GTPase-activating-like protein IQGAP2 OS=Mus musculus GN=Iqgap2 PE=1 SV=2
1066	1957	P61082|UBC12_MOUSE	1.85	150.95	6460	6980	1	1.08	6460	6980	1	1.08	-	-	32	8	6	Carbamidomethylation; TMT6plex	20900	NEDD8-conjugating enzyme Ubc12 OS=Mus musculus GN=Ube2m PE=1 SV=1
1337	1736	Q9CZS1|AL1B1_MOUSE	3.73	150.91	1940	1490	1	0.77	1940	1490	1	0.77	-	-	10	9	4	Carbamidomethylation; TMT6plex	57553	Aldehyde dehydrogenase X mitochondrial OS=Mus musculus GN=Aldh1b1 PE=1 SV=1
792	4097	P99028|QCR6_MOUSE	3.57	150.85	10900	10700	1	0.98	10900	10700	1	0.98	-	-	52	4	4	Carbamidomethylation; TMT6plex	10435	Cytochrome b-c1 complex subunit 6 mitochondrial OS=Mus musculus GN=Uqcrh PE=1 SV=2
1835	1994	Q9CQW1|YKT6_MOUSE	2.33	150.83	2600	2130	1	0.82	2600	2130	1	0.82	-	-	22	5	4	TMT6plex	22314	Synaptobrevin homolog YKT6 OS=Mus musculus GN=Ykt6 PE=1 SV=1
1401	1761	Q9CY58|PAIRB_MOUSE	3.75	150.81	2440	1900	1	0.78	2440	1900	1	0.78	-	-	5	4	3	TMT6plex	44714	Plasminogen activator inhibitor 1 RNA-binding protein OS=Mus musculus GN=Serbp1 PE=1 SV=2
1341	2728	tr|A0A0R4J0A6|A0A0R4J0A6_MOUSE	2.63	150.66	291	341.468	1	1.17	291	341.468	1	1.17	-	-	1	4	1	TMT6plex	64560	Solute carrier family 17 (Sodium-dependent inorganic phosphate cotransporter) member 6 isoform CRA_a OS=Mus musculus GN=Slc17a6 PE=1 SV=1
1341	2749	Q8BLE7|VGLU2_MOUSE	2.63	150.66	291	341.468	1	1.17	291	341.468	1	1.17	-	-	1	4	1	TMT6plex	64561	Vesicular glutamate transporter 2 OS=Mus musculus GN=Slc17a6 PE=1 SV=1
1621	1776	Q8K354|CBR3_MOUSE	1.74	150.66	1640	1620	1	0.99	1640	1620	1	0.99	-	-	13	5	3	Carbamidomethylation; TMT6plex	30953	Carbonyl reductase [NADPH] 3 OS=Mus musculus GN=Cbr3 PE=1 SV=1
817	3982	P27661|H2AX_MOUSE	11.5	150.29	1200	1640	1	1.37	1200	1640	1	1.37	-	-	17	6	2	TMT6plex	15143	Histone H2AX OS=Mus musculus GN=H2afx PE=1 SV=2
1644	1634	Q9WV02|RBMX_MOUSE	3.78	150.03	5320	4100	1	0.77	5320	4100	1	0.77	-	-	18	9	7	TMT6plex	42301	RNA-binding motif protein X chromosome OS=Mus musculus GN=Rbmx PE=1 SV=1
1630	1932	O35841|API5_MOUSE	0.9	149.7	1500	1540	1	1.03	1500	1540	1	1.03	-	-	7	5	4	TMT6plex	56785	Apoptosis inhibitor 5 OS=Mus musculus GN=Api5 PE=1 SV=2
1468	2196	P56812|PDCD5_MOUSE	3.16	149.67	4910	3920	1	0.8	4910	3920	1	0.8	-	-	33	6	4	TMT6plex	14275	Programmed cell death protein 5 OS=Mus musculus GN=Pdcd5 PE=1 SV=3
1183	1496	Q3UHB1|NT5D3_MOUSE	0.87	149.65	5260	5020	1	0.96	5260	5020	1	0.96	-	-	10	6	5	TMT6plex; Deamidation (NQ)	63171	5'-nucleotidase domain-containing protein 3 OS=Mus musculus GN=Nt5dc3 PE=1 SV=1
2135	2457	P15209|NTRK2_MOUSE	0.89	149.51	1100	1250	1	1.14	1100	1250	1	1.14	-	-	1	3	1	TMT6plex	92133	BDNF/NT-3 growth factors receptor OS=Mus musculus GN=Ntrk2 PE=1 SV=1
1149	1741	Q9JM52|MINK1_MOUSE	1.69	149.45	1440	1240	1	0.87	1440	1240	1	0.87	-	-	3	9	3	TMT6plex	147294	Misshapen-like kinase 1 OS=Mus musculus GN=Mink1 PE=1 SV=3
1149	1744	tr|G3X9G2|G3X9G2_MOUSE	1.69	149.45	1440	1240	1	0.87	1440	1240	1	0.87	-	-	3	9	3	TMT6plex	151223	Misshapen-like kinase 1 OS=Mus musculus GN=Mink1 PE=1 SV=1
1709	2152	Q9Z204|HNRPC_MOUSE	3.4	149.33	7790	7340	1	0.94	7790	7340	1	0.94	-	-	25	7	7	TMT6plex	34385	Heterogeneous nuclear ribonucleoproteins C1/C2 OS=Mus musculus GN=Hnrnpc PE=1 SV=1
1354	2815	Q62425|NDUA4_MOUSE	8.81	149.31	16100	23100	1	1.44	16100	23100	1	1.44	-	-	56	6	6	TMT6plex	9327	Cytochrome c oxidase subunit NDUFA4 OS=Mus musculus GN=Ndufa4 PE=1 SV=2
962	4001	P35762|CD81_MOUSE	2.06	149.24	5090	4410	1	0.87	5090	4410	1	0.87	-	-	28	4	4	Carbamidomethylation; TMT6plex; Oxidation (M); Deamidation (NQ)	25815	CD81 antigen OS=Mus musculus GN=Cd81 PE=1 SV=2
1416	3121	P43274|H14_MOUSE	6.37	149.24	2850	1970	1	0.69	2850	1970	1	0.69	-	-	5	4	1	TMT6plex	21977	Histone H1.4 OS=Mus musculus GN=Hist1h1e PE=1 SV=2
2119	1447	Q01065|PDE1B_MOUSE	0.46	149.02	253	259.683	1	1.03	253	259.683	1	1.03	-	-	1	2	1	TMT6plex	61226	Calcium/calmodulin-dependent 3' 5'-cyclic nucleotide phosphodiesterase 1B OS=Mus musculus GN=Pde1b PE=1 SV=2
1722	1948	Q64442|DHSO_MOUSE	0.94	149.01	2150	2030	1	0.95	2150	2030	1	0.95	-	-	14	6	5	Carbamidomethylation; TMT6plex	38249	Sorbitol dehydrogenase OS=Mus musculus GN=Sord PE=1 SV=3
1714	1505	Q9WVJ2|PSD13_MOUSE	2.25	148.89	5930	6120	1	1.03	5930	6120	1	1.03	-	-	20	10	8	Carbamidomethylation; TMT6plex	42809	26S proteasome non-ATPase regulatory subunit 13 OS=Mus musculus GN=Psmd13 PE=1 SV=1
1587	2089	P24472|GSTA4_MOUSE	2.06	148.81	6910	7430	1	1.08	6910	7430	1	1.08	-	-	16	6	4	TMT6plex	25564	Glutathione S-transferase A4 OS=Mus musculus GN=Gsta4 PE=1 SV=3
676	2163	Q01097|NMDE2_MOUSE	2.13	148.55	1550	1310	1	0.84	1550	1310	1	0.84	-	-	2	11	4	TMT6plex	165958	Glutamate receptor ionotropic NMDA 2B OS=Mus musculus GN=Grin2b PE=1 SV=3
676	2164	tr|G3X9V4|G3X9V4_MOUSE	2.13	148.55	1550	1310	1	0.84	1550	1310	1	0.84	-	-	2	11	4	TMT6plex	165992	Glutamate receptor ionotropic NMDA 2B OS=Mus musculus GN=Grin2b PE=1 SV=1
1525	1781	Q9CYG7|TOM34_MOUSE	1.28	148.53	2600	2570	1	0.99	2600	2570	1	0.99	-	-	22	6	6	Carbamidomethylation; TMT6plex	34278	Mitochondrial import receptor subunit TOM34 OS=Mus musculus GN=Tomm34 PE=1 SV=1
1987	2399	P63037|DNJA1_MOUSE	1.26	148.44	2940	2680	1	0.91	2940	2680	1	0.91	-	-	9	5	3	TMT6plex	44868	DnaJ homolog subfamily A member 1 OS=Mus musculus GN=Dnaja1 PE=1 SV=1
1377	1439	Q6NZL0|SOGA3_MOUSE	1.97	148.37	2040	1860	1	0.91	2040	1860	1	0.91	-	-	4	5	4	TMT6plex	103480	Protein SOGA3 OS=Mus musculus GN=Soga3 PE=1 SV=2
1305	2643	P61087|UBE2K_MOUSE	4.07	148.28	380	236.401	1	0.62	380	236.401	1	0.62	-	-	8	4	1	TMT6plex	22407	Ubiquitin-conjugating enzyme E2 K OS=Mus musculus GN=Ube2k PE=1 SV=3
2133	2029	P32020|NLTP_MOUSE	1.24	148.1	4980	5440	1	1.09	4980	5440	1	1.09	-	-	10	5	5	Carbamidomethylation; TMT6plex	59126	Non-specific lipid-transfer protein OS=Mus musculus GN=Scp2 PE=1 SV=3
2489	3399	Q9R1P1|PSB3_MOUSE	3.81	148.07	1200	1570	1	1.3	1200	1570	1	1.3	-	-	11	2	2	TMT6plex	22965	Proteasome subunit beta type-3 OS=Mus musculus GN=Psmb3 PE=1 SV=1
1691	2076	Q68FH0|PKP4_MOUSE	8.08	148.06	862	504.441	1	0.59	862	504.441	1	0.59	-	-	1	5	2	TMT6plex	131551	Plakophilin-4 OS=Mus musculus GN=Pkp4 PE=1 SV=1
1959	2678	Q9D1T0|LIGO1_MOUSE	4.4	148.02	1630	1360	1	0.83	1630	1360	1	0.83	-	-	11	7	4	Carbamidomethylation; TMT6plex	69101	Leucine-rich repeat and immunoglobulin-like domain-containing nogo receptor-interacting protein 1 OS=Mus musculus GN=Lingo1 PE=1 SV=1
1959	2681	tr|A9DA50|A9DA50_MOUSE	4.4	148.02	1630	1360	1	0.83	1630	1360	1	0.83	-	-	10	7	4	Carbamidomethylation; TMT6plex	69832	Leucine-rich repeat and immunoglobulin-like domain-containing nogo receptor-interacting protein 1 OS=Mus musculus GN=Lingo1 PE=1 SV=1
2136	2494	P61759|PFD3_MOUSE	2.29	147.97	1880	2060	1	1.09	1880	2060	1	1.09	-	-	23	5	4	Carbamidomethylation; TMT6plex	22436	Prefoldin subunit 3 OS=Mus musculus GN=Vbp1 PE=1 SV=2
1143	1895	P58389|PTPA_MOUSE	0.42	147.97	5720	5530	1	0.97	5720	5530	1	0.97	-	-	24	9	7	TMT6plex	36710	Serine/threonine-protein phosphatase 2A activator OS=Mus musculus GN=Ptpa PE=1 SV=1
1312	3104	Q9WV98|TIM9_MOUSE	2.51	147.94	15100	13300	1	0.88	15100	13300	1	0.88	-	-	65	5	5	Carbamidomethylation; TMT6plex	10344	Mitochondrial import inner membrane translocase subunit Tim9 OS=Mus musculus GN=Timm9 PE=1 SV=1
2417	3132	Q99LY9|NDUS5_MOUSE	5	147.92	2640	2900	1	1.1	2640	2900	1	1.1	-	-	35	3	3	Carbamidomethylation; TMT6plex	12648	NADH dehydrogenase [ubiquinone] iron-sulfur protein 5 OS=Mus musculus GN=Ndufs5 PE=1 SV=3
2084	2070	tr|Q3TPJ8|Q3TPJ8_MOUSE	2.33	147.88	3350	2870	1	0.86	3350	2870	1	0.86	-	-	6	6	4	TMT6plex	70613	Cytoplasmic dynein 1 intermediate chain 2 OS=Mus musculus GN=Dync1i2 PE=1 SV=1
2084	2071	tr|A2BFF9|A2BFF9_MOUSE	2.33	147.88	3350	2870	1	0.86	3350	2870	1	0.86	-	-	5	6	4	TMT6plex	71424	Cytoplasmic dynein 1 intermediate chain 2 OS=Mus musculus GN=Dync1i2 PE=1 SV=1
2084	2073	tr|A2BFF5|A2BFF5_MOUSE	2.33	147.88	3350	2870	1	0.86	3350	2870	1	0.86	-	-	5	6	4	TMT6plex	71296	Cytoplasmic dynein 1 intermediate chain 2 OS=Mus musculus GN=Dync1i2 PE=1 SV=1
1552	2244	Q9QZM0|UBQL2_MOUSE	3.6	147.83	700	608.911	1	0.87	700	608.911	1	0.87	-	-	2	5	1	TMT6plex; Oxidation (M)	67351	Ubiquilin-2 OS=Mus musculus GN=Ubqln2 PE=1 SV=2
1740	3438	Q9CQC7|NDUB4_MOUSE	4.43	147.65	3950	4660	1	1.18	3950	4660	1	1.18	-	-	42	4	4	TMT6plex; Deamidation (NQ)	15081	NADH dehydrogenase [ubiquinone] 1 beta subcomplex subunit 4 OS=Mus musculus GN=Ndufb4 PE=1 SV=3
1488	1867	tr|F8WHM5|F8WHM5_MOUSE	2.16	147.53	2050	1910	1	0.93	2050	1910	1	0.93	-	-	4	10	5	Carbamidomethylation; TMT6plex	132351	Golgi apparatus protein 1 (Fragment) OS=Mus musculus GN=Glg1 PE=1 SV=1
1488	1871	Q61543|GSLG1_MOUSE	2.16	147.53	2050	1910	1	0.93	2050	1910	1	0.93	-	-	4	10	5	Carbamidomethylation; TMT6plex	133734	Golgi apparatus protein 1 OS=Mus musculus GN=Glg1 PE=1 SV=1
1067	2064	P47740|AL3A2_MOUSE	2.42	147.5	1760	1570	1	0.89	1760	1570	1	0.89	-	-	10	10	4	TMT6plex	53971	Fatty aldehyde dehydrogenase OS=Mus musculus GN=Aldh3a2 PE=1 SV=2
1067	2067	tr|B1AV77|B1AV77_MOUSE	2.42	147.5	1760	1570	1	0.89	1760	1570	1	0.89	-	-	10	10	4	TMT6plex	54330	Aldehyde dehydrogenase OS=Mus musculus GN=Aldh3a2 PE=1 SV=1
1067	2078	tr|B1ATI0|B1ATI0_MOUSE	2.42	147.5	1760	1570	1	0.89	1760	1570	1	0.89	-	-	9	10	4	TMT6plex	59277	Aldehyde dehydrogenase OS=Mus musculus GN=Aldh3a2 PE=1 SV=1
657	2638	P00405|COX2_MOUSE	5.73	147.44	39300	40500	1	1.03	39300	40500	1	1.03	-	-	24	7	6	TMT6plex; Oxidation (M)	25976	Cytochrome c oxidase subunit 2 OS=Mus musculus GN=Mtco2 PE=1 SV=1
1176	2340	P57759|ERP29_MOUSE	3.22	147.25	3200	2590	1	0.81	3200	2590	1	0.81	-	-	15	6	4	TMT6plex	28823	Endoplasmic reticulum resident protein 29 OS=Mus musculus GN=Erp29 PE=1 SV=2
1656	1484	Q99JP7|GGT7_MOUSE	0.88	147.23	967	945.006	1	0.98	967	945.006	1	0.98	-	-	6	4	3	TMT6plex	70252	Gamma-glutamyltransferase 7 OS=Mus musculus GN=Ggt7 PE=1 SV=2
1472	2551	P62082|RS7_MOUSE	2.49	147.21	7340	6360	1	0.87	7340	6360	1	0.87	-	-	26	4	4	TMT6plex	22127	40S ribosomal protein S7 OS=Mus musculus GN=Rps7 PE=2 SV=1
1025	2341	tr|B7ZCU2|B7ZCU2_MOUSE	0.78	147.09	317	282.368	1	0.89	317	282.368	1	0.89	-	-	4	6	1	Carbamidomethylation; TMT6plex	43174	Abl interactor 1 OS=Mus musculus GN=Abi1 PE=1 SV=1
1025	2346	tr|B7ZCU5|B7ZCU5_MOUSE	0.78	147.09	317	282.368	1	0.89	317	282.368	1	0.89	-	-	4	6	1	Carbamidomethylation; TMT6plex	46252	Abl interactor 1 OS=Mus musculus GN=Abi1 PE=1 SV=1
1025	2351	tr|B7ZCU4|B7ZCU4_MOUSE	0.78	147.09	317	282.368	1	0.89	317	282.368	1	0.89	-	-	3	6	1	Carbamidomethylation; TMT6plex	49139	Abl interactor 1 OS=Mus musculus GN=Abi1 PE=1 SV=1
1025	2352	tr|B7ZCU3|B7ZCU3_MOUSE	0.78	147.09	317	282.368	1	0.89	317	282.368	1	0.89	-	-	3	6	1	Carbamidomethylation; TMT6plex	49210	Abl interactor 1 OS=Mus musculus GN=Abi1 PE=1 SV=1
1025	2357	tr|B7ZCU0|B7ZCU0_MOUSE	0.78	147.09	317	282.368	1	0.89	317	282.368	1	0.89	-	-	3	6	1	Carbamidomethylation; TMT6plex	52217	Abl interactor 1 OS=Mus musculus GN=Abi1 PE=1 SV=1
1025	2358	tr|J3QNK8|J3QNK8_MOUSE	0.78	147.09	317	282.368	1	0.89	317	282.368	1	0.89	-	-	3	6	1	Carbamidomethylation; TMT6plex	52346	Abl interactor 1 OS=Mus musculus GN=Abi1 PE=1 SV=1
1025	2359	Q8CBW3|ABI1_MOUSE	0.78	147.09	317	282.368	1	0.89	317	282.368	1	0.89	-	-	3	6	1	Carbamidomethylation; TMT6plex	52288	Abl interactor 1 OS=Mus musculus GN=Abi1 PE=1 SV=3
2196	3027	Q91YD9|WASL_MOUSE	4.44	147.07	544	789.197	1	1.45	544	789.197	1	1.45	-	-	3	3	2	TMT6plex	54274	Neural Wiskott-Aldrich syndrome protein OS=Mus musculus GN=Wasl PE=1 SV=1
1147	1678	tr|V9GWT6|V9GWT6_MOUSE	0.94	147.03	767	829.194	1	1.08	767	829.194	1	1.08	-	-	2	9	2	TMT6plex	108848	ELKS/Rab6-interacting/CAST family member 1 OS=Mus musculus GN=Erc1 PE=1 SV=1
1147	1688	tr|V9GXH3|V9GXH3_MOUSE	0.94	147.03	767	829.194	1	1.08	767	829.194	1	1.08	-	-	2	9	2	TMT6plex	113975	ELKS/Rab6-interacting/CAST family member 1 OS=Mus musculus GN=Erc1 PE=1 SV=1
1147	1703	tr|F8VPM7|F8VPM7_MOUSE	0.94	147.03	767	829.194	1	1.08	767	829.194	1	1.08	-	-	2	9	2	TMT6plex	128330	ELKS/Rab6-interacting/CAST family member 1 OS=Mus musculus GN=Erc1 PE=1 SV=1
1147	1704	Q99MI1|RB6I2_MOUSE	0.94	147.03	767	829.194	1	1.08	767	829.194	1	1.08	-	-	2	9	2	TMT6plex	128330	ELKS/Rab6-interacting/CAST family member 1 OS=Mus musculus GN=Erc1 PE=1 SV=1
2278	2446	P56395|CYB5_MOUSE	1.56	146.94	621	596.375	1	0.96	621	596.375	1	0.96	-	-	22	3	2	TMT6plex	15241	Cytochrome b5 OS=Mus musculus GN=Cyb5a PE=1 SV=2
2114	2194	tr|G3X972|G3X972_MOUSE	2.85	146.87	394	291.919	1	0.74	394	291.919	1	0.74	-	-	1	3	1	TMT6plex	118581	SEC24 related gene family member C (S. cerevisiae) isoform CRA_a OS=Mus musculus GN=Sec24c PE=1 SV=1
1186	2896	P63168|DYL1_MOUSE	1.81	146.84	2480	2230	1	0.9	2480	2230	1	0.9	-	-	33	7	2	Carbamidomethylation; TMT6plex	10366	Dynein light chain 1 cytoplasmic OS=Mus musculus GN=Dynll1 PE=1 SV=1
1532	2703	tr|A0A1L1SVK0|A0A1L1SVK0_MOUSE	1.19	146.8	11600	12600	1	1.09	11600	12600	1	1.09	-	-	22	6	4	Carbamidomethylation; TMT6plex; Deamidation (NQ)	22056	Platelet-activating factor acetylhydrolase IB subunit beta (Fragment) OS=Mus musculus GN=Pafah1b2 PE=1 SV=1
1532	2714	Q61206|PA1B2_MOUSE	1.19	146.8	11600	12600	1	1.09	11600	12600	1	1.09	-	-	19	6	4	Carbamidomethylation; TMT6plex; Deamidation (NQ)	25581	Platelet-activating factor acetylhydrolase IB subunit beta OS=Mus musculus GN=Pafah1b2 PE=1 SV=2
973	1577	Q91YM2|RHG35_MOUSE	1.49	146.71	1160	1220	1	1.05	1160	1220	1	1.05	-	-	2	7	4	TMT6plex	170392	Rho GTPase-activating protein 35 OS=Mus musculus GN=Arhgap35 PE=1 SV=3
1822	2797	Q9DB73|NB5R1_MOUSE	3.98	146.67	406	530.111	1	1.31	406	530.111	1	1.31	-	-	4	2	1	TMT6plex	34135	NADH-cytochrome b5 reductase 1 OS=Mus musculus GN=Cyb5r1 PE=1 SV=1
2348	2173	Q8C854|MYEF2_MOUSE	2.49	146.56	697	574.884	1	0.82	697	574.884	1	0.82	-	-	4	2	2	Carbamidomethylation; TMT6plex	63295	Myelin expression factor 2 OS=Mus musculus GN=Myef2 PE=1 SV=1
2348	2174	tr|A2ATP6|A2ATP6_MOUSE	2.49	146.56	697	574.884	1	0.82	697	574.884	1	0.82	-	-	4	2	2	Carbamidomethylation; TMT6plex	61104	Myelin expression factor 2 OS=Mus musculus GN=Myef2 PE=1 SV=2
2348	2176	tr|A2ATP5|A2ATP5_MOUSE	2.49	146.56	697	574.884	1	0.82	697	574.884	1	0.82	-	-	4	2	2	Carbamidomethylation; TMT6plex	59543	Myelin expression factor 2 OS=Mus musculus GN=Myef2 PE=1 SV=1
1407	3317	Q62426|CYTB_MOUSE	2.3	146.49	4660	4020	1	0.86	4660	4020	1	0.86	-	-	40	6	3	TMT6plex	11046	Cystatin-B OS=Mus musculus GN=Cstb PE=1 SV=1
2294	3336	P62838|UB2D2_MOUSE	1.65	146.39	968	788.003	1	0.81	968	788.003	1	0.81	-	-	5	4	1	TMT6plex	16735	Ubiquitin-conjugating enzyme E2 D2 OS=Mus musculus GN=Ube2d2 PE=1 SV=1
2349	2747	P37804|TAGL_MOUSE	2.18	146.37	1860	1910	1	1.03	1860	1910	1	1.03	-	-	22	5	4	TMT6plex	22576	Transgelin OS=Mus musculus GN=Tagln PE=1 SV=3
1813	2274	Q60692|PSB6_MOUSE	1.33	146.25	4600	4160	1	0.9	4600	4160	1	0.9	-	-	22	5	5	Carbamidomethylation; TMT6plex	25379	Proteasome subunit beta type-6 OS=Mus musculus GN=Psmb6 PE=1 SV=3
2013	2601	P62900|RL31_MOUSE	7.33	146.09	5230	4000	1	0.77	5230	4000	1	0.77	-	-	37	5	5	TMT6plex	14463	60S ribosomal protein L31 OS=Mus musculus GN=Rpl31 PE=1 SV=1
1223	1783	Q61166|MARE1_MOUSE	1.81	146.06	4470	4100	1	0.92	4470	4100	1	0.92	-	-	21	7	5	TMT6plex	30016	Microtubule-associated protein RP/EB family member 1 OS=Mus musculus GN=Mapre1 PE=1 SV=3
1308	1610	Q922Q1|MARC2_MOUSE	1.08	145.86	3610	3660	1	1.01	3610	3660	1	1.01	-	-	14	8	5	Carbamidomethylation; TMT6plex	38194	Mitochondrial amidoxime reducing component 2 OS=Mus musculus GN=Marc2 PE=1 SV=1
1474	2112	P22599|A1AT2_MOUSE	1.46	145.62	1040	1280	1	1.22	1040	1280	1	1.22	-	-	2	5	1	TMT6plex	45975	Alpha-1-antitrypsin 1-2 OS=Mus musculus GN=Serpina1b PE=1 SV=2
1707	1878	P28650|PURA1_MOUSE	2.91	145.56	485	336.692	1	0.69	485	336.692	1	0.69	-	-	4	1	1	TMT6plex	50254	Adenylosuccinate synthetase isozyme 1 OS=Mus musculus GN=Adssl1 PE=1 SV=2
1648	2475	tr|E9QAT0|E9QAT0_MOUSE	0.92	145.43	1470	1460	1	1	1470	1460	1	1	-	-	8	6	4	TMT6plex; Deamidation (NQ)	66170	Synaptic functional regulator FMR1 OS=Mus musculus GN=Fmr1 PE=1 SV=1
1648	2476	tr|D3Z6U8|D3Z6U8_MOUSE	0.92	145.43	1470	1460	1	1	1470	1460	1	1	-	-	8	6	4	TMT6plex; Deamidation (NQ)	66532	Synaptic functional regulator FMR1 OS=Mus musculus GN=Fmr1 PE=1 SV=1
1648	2477	tr|E9QNF5|E9QNF5_MOUSE	0.92	145.43	1470	1460	1	1	1470	1460	1	1	-	-	8	6	4	TMT6plex; Deamidation (NQ)	66717	Synaptic functional regulator FMR1 OS=Mus musculus GN=Fmr1 PE=1 SV=1
1648	2480	P35922|FMR1_MOUSE	0.92	145.43	1470	1460	1	1	1470	1460	1	1	-	-	8	6	4	TMT6plex; Deamidation (NQ)	68989	Synaptic functional regulator FMR1 OS=Mus musculus GN=Fmr1 PE=1 SV=1
1648	2481	tr|Q6AXB7|Q6AXB7_MOUSE	0.92	145.43	1470	1460	1	1	1470	1460	1	1	-	-	8	6	4	TMT6plex; Deamidation (NQ)	68890	Fragile X mental retardation syndrome 1 homolog OS=Mus musculus GN=Fmr1 PE=1 SV=1
1307	1557	Q91X72|HEMO_MOUSE	3.76	145.4	2570	3370	1	1.31	2570	3370	1	1.31	-	-	13	10	7	Carbamidomethylation; TMT6plex	51318	Hemopexin OS=Mus musculus GN=Hpx PE=1 SV=2
2366	2328	Q3USB7|PLCL1_MOUSE	3.51	145.26	2120	1690	1	0.8	2120	1690	1	0.8	-	-	4	3	3	TMT6plex	122673	Inactive phospholipase C-like protein 1 OS=Mus musculus GN=Plcl1 PE=1 SV=3
2399	2204	Q8R0F8|FAHD1_MOUSE	5.2	145.2	266	409.523	1	1.54	266	409.523	1	1.54	-	-	6	1	1	TMT6plex	25172	Acylpyruvase FAHD1 mitochondrial OS=Mus musculus GN=Fahd1 PE=1 SV=2
1478	3789	Q8R0W0|EPIPL_MOUSE	1.54	145.17	304	374.898	1	1.23	304	374.898	1	1.23	-	-	0	4	1	TMT6plex	724747	Epiplakin OS=Mus musculus GN=Eppk1 PE=1 SV=2
1511	1563	P59325|IF5_MOUSE	1.24	145.07	3630	3360	1	0.93	3630	3360	1	0.93	-	-	17	7	7	Carbamidomethylation; TMT6plex; Deamidation (NQ)	48968	Eukaryotic translation initiation factor 5 OS=Mus musculus GN=Eif5 PE=1 SV=1
1888	2873	P35979|RL12_MOUSE	2.55	145.01	1980	1660	1	0.83	1980	1660	1	0.83	-	-	24	5	3	Carbamidomethylation; TMT6plex	17805	60S ribosomal protein L12 OS=Mus musculus GN=Rpl12 PE=1 SV=2
1659	2850	Q91VR8|BRK1_MOUSE	3.54	144.95	3360	2640	1	0.79	3360	2640	1	0.79	-	-	48	6	5	TMT6plex	8761	Protein BRICK1 OS=Mus musculus GN=Brk1 PE=1 SV=1
1812	2263	P12970|RL7A_MOUSE	12.34	144.82	3520	2020	1	0.57	3520	2020	1	0.57	-	-	15	6	4	TMT6plex	29977	60S ribosomal protein L7a OS=Mus musculus GN=Rpl7a PE=1 SV=2
1612	1390	Q9EPK7|XPO7_MOUSE	1.67	144.78	634	638.163	1	1.01	634	638.163	1	1.01	-	-	2	4	2	Carbamidomethylation; TMT6plex	123810	Exportin-7 OS=Mus musculus GN=Xpo7 PE=1 SV=3
1977	1699	Q5XJY5|COPD_MOUSE	3.86	144.71	747	546.229	1	0.73	747	546.229	1	0.73	-	-	4	3	2	TMT6plex	57230	Coatomer subunit delta OS=Mus musculus GN=Arcn1 PE=1 SV=2
1775	2156	P53395|ODB2_MOUSE	1.64	144.64	3170	3290	1	1.04	3170	3290	1	1.04	-	-	17	9	8	TMT6plex	53247	Lipoamide acyltransferase component of branched-chain alpha-keto acid dehydrogenase complex mitochondrial OS=Mus musculus GN=Dbt PE=1 SV=2
2195	2259	tr|D3Z5I7|D3Z5I7_MOUSE	6.28	144.64	1380	1340	1	0.97	1380	1340	1	0.97	-	-	5	6	3	TMT6plex	89991	Inactive dipeptidyl peptidase 10 OS=Mus musculus GN=Dpp10 PE=1 SV=2
2195	2260	Q6NXK7|DPP10_MOUSE	6.28	144.64	1380	1340	1	0.97	1380	1340	1	0.97	-	-	5	6	3	TMT6plex	90827	Inactive dipeptidyl peptidase 10 OS=Mus musculus GN=Dpp10 PE=1 SV=1
2195	2261	tr|E9QN98|E9QN98_MOUSE	6.28	144.64	1380	1340	1	0.97	1380	1340	1	0.97	-	-	5	6	3	TMT6plex	91130	Inactive dipeptidyl peptidase 10 OS=Mus musculus GN=Dpp10 PE=1 SV=1
2065	1879	Q91Y86|MK08_MOUSE	1.17	144.19	520	448.923	1	0.86	520	448.923	1	0.86	-	-	3	7	1	TMT6plex	44229	Mitogen-activated protein kinase 8 OS=Mus musculus GN=Mapk8 PE=1 SV=1
3445	2600	Q8BGD5|CPT1C_MOUSE	3.23	144.13	642	432.207	1	0.67	642	432.207	1	0.67	-	-	1	1	1	TMT6plex	90030	Carnitine O-palmitoyltransferase 1 brain isoform OS=Mus musculus GN=Cpt1c PE=1 SV=1
1333	2175	A2AWA9|RBGP1_MOUSE	4.03	144.09	1060	776.063	1	0.73	1060	776.063	1	0.73	-	-	1	7	2	TMT6plex	120798	Rab GTPase-activating protein 1 OS=Mus musculus GN=Rabgap1 PE=1 SV=1
1723	2030	Q99LF4|RTCB_MOUSE	2.82	143.93	3910	3620	1	0.92	3910	3620	1	0.92	-	-	20	9	8	Carbamidomethylation; TMT6plex	55249	tRNA-splicing ligase RtcB homolog OS=Mus musculus GN=Rtcb PE=1 SV=1
2722	3980	Q9CQX8|RT36_MOUSE	3.89	143.84	3950	3570	1	0.9	3950	3570	1	0.9	-	-	57	3	3	TMT6plex	11101	28S ribosomal protein S36 mitochondrial OS=Mus musculus GN=Mrps36 PE=1 SV=1
1526	2648	P59999|ARPC4_MOUSE	2.75	143.77	6150	5070	1	0.82	6150	5070	1	0.82	-	-	10	2	2	TMT6plex	19667	Actin-related protein 2/3 complex subunit 4 OS=Mus musculus GN=Arpc4 PE=1 SV=3
2859	2783	Q9D8W7|OCAD2_MOUSE	1.83	143.76	1030	1110	1	1.08	1030	1110	1	1.08	-	-	26	4	4	Carbamidomethylation; TMT6plex	16926	OCIA domain-containing protein 2 OS=Mus musculus GN=Ociad2 PE=1 SV=1
2154	1911	P58871|TB182_MOUSE	5.68	143.73	760	602.941	1	0.79	760	602.941	1	0.79	-	-	1	2	2	TMT6plex; Deamidation (NQ)	181824	182 kDa tankyrase-1-binding protein OS=Mus musculus GN=Tnks1bp1 PE=1 SV=2
2523	2537	Q8BLF1|NCEH1_MOUSE	2.35	143.7	963	987.391	1	1.03	963	987.391	1	1.03	-	-	7	2	2	TMT6plex	45740	Neutral cholesterol ester hydrolase 1 OS=Mus musculus GN=Nceh1 PE=1 SV=1
1628	1605	P24549|AL1A1_MOUSE	1.15	143.61	807	854.863	1	1.06	807	854.863	1	1.06	-	-	4	6	2	Carbamidomethylation; TMT6plex	54468	Retinal dehydrogenase 1 OS=Mus musculus GN=Aldh1a1 PE=1 SV=5
1012	2710	Q5SYD0|MYO1D_MOUSE	2.61	143.58	2320	2100	1	0.9	2320	2100	1	0.9	-	-	1	6	2	TMT6plex	116081	Unconventional myosin-Id OS=Mus musculus GN=Myo1d PE=1 SV=1
1467	2059	Q8BW75|AOFB_MOUSE	1.05	143.45	2380	2350	1	0.99	2380	2350	1	0.99	-	-	6	6	4	TMT6plex	58558	Amine oxidase [flavin-containing] B OS=Mus musculus GN=Maob PE=1 SV=4
1830	3268	Q9QUH0|GLRX1_MOUSE	3.35	143.36	1920	1800	1	0.94	1920	1800	1	0.94	-	-	22	4	2	Carbamidomethylation; TMT6plex	11871	Glutaredoxin-1 OS=Mus musculus GN=Glrx PE=1 SV=3
3436	2926	tr|E0CYB9|E0CYB9_MOUSE	4.55	143.34	557	625.029	1	1.12	557	625.029	1	1.12	-	-	12	2	2	TMT6plex	35879	Mitochondrial fission factor OS=Mus musculus GN=Mff PE=1 SV=1
3436	2927	Q6PCP5|MFF_MOUSE	4.55	143.34	557	625.029	1	1.12	557	625.029	1	1.12	-	-	13	2	2	TMT6plex	32931	Mitochondrial fission factor OS=Mus musculus GN=Mff PE=1 SV=1
1510	1536	tr|A0A0G2JFZ5|A0A0G2JFZ5_MOUSE	4.27	143.23	582	486.532	1	0.84	582	486.532	1	0.84	-	-	1	5	2	TMT6plex	171316	Leucine-rich repeat-containing protein 7 (Fragment) OS=Mus musculus GN=Lrrc7 PE=1 SV=1
1510	1537	tr|E9Q6L9|E9Q6L9_MOUSE	4.27	143.23	582	486.532	1	0.84	582	486.532	1	0.84	-	-	1	5	2	TMT6plex	172661	Leucine-rich repeat-containing protein 7 OS=Mus musculus GN=Lrrc7 PE=1 SV=1
1510	1539	Q80TE7|LRRC7_MOUSE	4.27	143.23	582	486.532	1	0.84	582	486.532	1	0.84	-	-	1	5	2	TMT6plex	166900	Leucine-rich repeat-containing protein 7 OS=Mus musculus GN=Lrrc7 PE=1 SV=2
1510	1540	tr|A0A0G2JDT9|A0A0G2JDT9_MOUSE	4.27	143.23	582	486.532	1	0.84	582	486.532	1	0.84	-	-	1	5	2	TMT6plex	167504	Leucine-rich repeat-containing protein 7 OS=Mus musculus GN=Lrrc7 PE=1 SV=1
2291	2502	P45878|FKBP2_MOUSE	2.12	143.22	1530	1430	1	0.93	1530	1430	1	0.93	-	-	28	4	3	Carbamidomethylation; TMT6plex	15344	Peptidyl-prolyl cis-trans isomerase FKBP2 OS=Mus musculus GN=Fkbp2 PE=1 SV=1
1716	2262	P20060|HEXB_MOUSE	3.38	143.1	1430	1060	1	0.74	1430	1060	1	0.74	-	-	4	4	2	TMT6plex	61116	Beta-hexosaminidase subunit beta OS=Mus musculus GN=Hexb PE=1 SV=2
1649	1547	tr|E9PY16|E9PY16_MOUSE	2.23	142.94	5070	4410	1	0.87	5070	4410	1	0.87	-	-	23	9	8	TMT6plex	43370	ArfGAP with dual PH domains 1 OS=Mus musculus GN=Adap1 PE=1 SV=1
1679	1873	Q8BH04|PCKGM_MOUSE	0.66	142.87	1590	1590	1	1	1590	1590	1	1	-	-	7	5	4	Carbamidomethylation; TMT6plex	70528	Phosphoenolpyruvate carboxykinase [GTP] mitochondrial OS=Mus musculus GN=Pck2 PE=1 SV=1
1679	1877	tr|A0A0R4J0G0|A0A0R4J0G0_MOUSE	0.66	142.87	1590	1590	1	1	1590	1590	1	1	-	-	6	5	4	Carbamidomethylation; TMT6plex	73418	Phosphoenolpyruvate carboxykinase [GTP] mitochondrial OS=Mus musculus GN=Pck2 PE=1 SV=1
1633	2305	Q80X80|C2C2L_MOUSE	4.76	142.85	722	492.502	1	0.68	722	492.502	1	0.68	-	-	4	4	2	TMT6plex	76329	Phospholipid transfer protein C2CD2L OS=Mus musculus GN=C2cd2l PE=1 SV=3
1085	1853	tr|F8VPN4|F8VPN4_MOUSE	1.12	142.84	2580	2400	1	0.93	2580	2400	1	0.93	-	-	4	8	5	TMT6plex	174286	Amylo-1 6-glucosidase 4-alpha-glucanotransferase OS=Mus musculus GN=Agl PE=1 SV=1
2858	1863	Q6P069|SORCN_MOUSE	1.29	142.74	4020	3620	1	0.9	4020	3620	1	0.9	-	-	35	7	7	TMT6plex; Deamidation (NQ)	21627	Sorcin OS=Mus musculus GN=Sri PE=1 SV=1
1808	2367	Q9D5T0|ATAD1_MOUSE	4.19	142.71	1490	1270	1	0.85	1490	1270	1	0.85	-	-	7	4	3	Carbamidomethylation; TMT6plex	40744	ATPase family AAA domain-containing protein 1 OS=Mus musculus GN=Atad1 PE=1 SV=1
1161	1801	tr|E9Q706|E9Q706_MOUSE	2.03	142.51	1820	1730	1	0.95	1820	1730	1	0.95	-	-	4	10	5	Carbamidomethylation; TMT6plex; Oxidation (M)	124388	Adenylate cyclase type 9 OS=Mus musculus GN=Adcy9 PE=1 SV=1
1161	1815	P51830|ADCY9_MOUSE	2.03	142.51	1820	1730	1	0.95	1820	1730	1	0.95	-	-	3	10	5	Carbamidomethylation; TMT6plex; Oxidation (M)	150954	Adenylate cyclase type 9 OS=Mus musculus GN=Adcy9 PE=1 SV=1
2002	3125	Q9CRB9|MIC19_MOUSE	4.1	142.38	810	1050	1	1.29	810	1050	1	1.29	-	-	9	6	2	Carbamidomethylation; TMT6plex	26335	MICOS complex subunit Mic19 OS=Mus musculus GN=Chchd3 PE=1 SV=1
1454	1981	tr|Q5NCM5|Q5NCM5_MOUSE	2.04	142.37	734	603.538	1	0.82	734	603.538	1	0.82	-	-	3	6	2	TMT6plex	67786	Epsin-2 OS=Mus musculus GN=Epn2 PE=1 SV=1
1454	1983	tr|J3QNT7|J3QNT7_MOUSE	2.04	142.37	734	603.538	1	0.82	734	603.538	1	0.82	-	-	3	6	2	TMT6plex	68390	Epsin-2 OS=Mus musculus GN=Epn2 PE=1 SV=1
1962	2323	Q6PDM2|SRSF1_MOUSE	10.25	142.3	1270	801.733	1	0.63	1270	801.733	1	0.63	-	-	12	5	3	Carbamidomethylation; TMT6plex	27745	Serine/arginine-rich splicing factor 1 OS=Mus musculus GN=Srsf1 PE=1 SV=3
1962	2325	tr|H7BX95|H7BX95_MOUSE	10.25	142.3	1270	801.733	1	0.63	1270	801.733	1	0.63	-	-	12	5	3	Carbamidomethylation; TMT6plex	28329	Serine/arginine-rich-splicing factor 1 OS=Mus musculus GN=Srsf1 PE=1 SV=1
1638	2568	Q922Q8|LRC59_MOUSE	1.87	142.16	3550	3660	1	1.03	3550	3660	1	1.03	-	-	16	6	4	Carbamidomethylation; TMT6plex	34877	Leucine-rich repeat-containing protein 59 OS=Mus musculus GN=Lrrc59 PE=1 SV=1
2660	2061	Q8BWM0|PGES2_MOUSE	1.56	142	596	553.393	1	0.93	596	553.393	1	0.93	-	-	8	3	2	TMT6plex	43324	Prostaglandin E synthase 2 OS=Mus musculus GN=Ptges2 PE=1 SV=3
2260	2841	Q8K3J1|NDUS8_MOUSE	2.02	141.98	4140	4650	1	1.12	4140	4650	1	1.12	-	-	21	5	4	Carbamidomethylation; TMT6plex; Oxidation (M)	24038	NADH dehydrogenase [ubiquinone] iron-sulfur protein 8 mitochondrial OS=Mus musculus GN=Ndufs8 PE=1 SV=1
1891	2514	P28271|ACOC_MOUSE	1.79	141.97	1920	2120	1	1.1	1920	2120	1	1.1	-	-	7	7	5	TMT6plex	98126	Cytoplasmic aconitate hydratase OS=Mus musculus GN=Aco1 PE=1 SV=3
3114	2387	Q5U458|DJC11_MOUSE	1.84	141.93	456	547.423	1	1.2	456	547.423	1	1.2	-	-	3	2	2	TMT6plex	63233	DnaJ homolog subfamily C member 11 OS=Mus musculus GN=Dnajc11 PE=1 SV=2
1309	2021	Q9Z1W9|STK39_MOUSE	2.96	141.83	557	636.372	1	1.14	557	636.372	1	1.14	-	-	1	3	1	Carbamidomethylation; TMT6plex	60320	STE20/SPS1-related proline-alanine-rich protein kinase OS=Mus musculus GN=Stk39 PE=1 SV=1
2014	2758	P31648|SC6A1_MOUSE	3.41	141.67	7130	5660	1	0.79	7130	5660	1	0.79	-	-	13	5	5	Carbamidomethylation; TMT6plex	67002	Sodium- and chloride-dependent GABA transporter 1 OS=Mus musculus GN=Slc6a1 PE=1 SV=2
2688	2614	Q99KK7|DPP3_MOUSE	3.65	141.6	380	361.765	1	0.95	380	361.765	1	0.95	-	-	1	1	1	TMT6plex	82898	Dipeptidyl peptidase 3 OS=Mus musculus GN=Dpp3 PE=1 SV=2
1827	1794	Q8BYM5|NLGN3_MOUSE	1.9	141.56	1560	1350	1	0.86	1560	1350	1	0.86	-	-	2	2	2	TMT6plex	91162	Neuroligin-3 OS=Mus musculus GN=Nlgn3 PE=1 SV=2
1827	1797	tr|A2AGI2|A2AGI2_MOUSE	1.9	141.56	1560	1350	1	0.86	1560	1350	1	0.86	-	-	2	2	2	TMT6plex	93487	Neuroligin-3 OS=Mus musculus GN=Nlgn3 PE=1 SV=1
1189	3412	P63213|GBG2_MOUSE	2.87	141.56	13100	11400	1	0.87	13100	11400	1	0.87	-	-	52	4	3	Carbamidomethylation; TMT6plex	7850	Guanine nucleotide-binding protein G(I)/G(S)/G(O) subunit gamma-2 OS=Mus musculus GN=Gng2 PE=1 SV=2
1643	2100	Q9CQD1|RAB5A_MOUSE	4.13	141.5	1350	836.954	1	0.62	1350	836.954	1	0.62	-	-	7	7	1	TMT6plex	23599	Ras-related protein Rab-5A OS=Mus musculus GN=Rab5a PE=1 SV=1
1889	1778	tr|A0A0R4J0B8|A0A0R4J0B8_MOUSE	1.43	141.47	2600	2300	1	0.88	2600	2300	1	0.88	-	-	17	5	5	Carbamidomethylation; TMT6plex	38950	Endophilin-A3 OS=Mus musculus GN=Sh3gl3 PE=1 SV=1
1816	2656	tr|A0A087WQE6|A0A087WQE6_MOUSE	1.96	141.26	6530	5930	1	0.91	6530	5930	1	0.91	-	-	56	5	5	Carbamidomethylation; TMT6plex	10657	Elongin-C (Fragment) OS=Mus musculus GN=Eloc PE=1 SV=1
1816	2657	P83940|ELOC_MOUSE	1.96	141.26	6530	5930	1	0.91	6530	5930	1	0.91	-	-	47	5	5	Carbamidomethylation; TMT6plex	12473	Elongin-C OS=Mus musculus GN=Eloc PE=1 SV=1
1816	2658	tr|A0A087WNT1|A0A087WNT1_MOUSE	1.96	141.26	6530	5930	1	0.91	6530	5930	1	0.91	-	-	40	5	5	Carbamidomethylation; TMT6plex	14940	Elongin-C OS=Mus musculus GN=Eloc PE=1 SV=1
1244	2662	tr|A0A0J9YUZ4|A0A0J9YUZ4_MOUSE	2.63	141.04	13900	13300	1	0.96	13900	13300	1	0.96	-	-	27	8	7	TMT6plex	24234	High mobility group protein B1 (Fragment) OS=Mus musculus GN=Hmgb1 PE=1 SV=1
1244	2682	P63158|HMGB1_MOUSE	2.63	141.04	13900	13300	1	0.96	13900	13300	1	0.96	-	-	27	8	7	TMT6plex	24894	High mobility group protein B1 OS=Mus musculus GN=Hmgb1 PE=1 SV=2
1133	2441	O35381|AN32A_MOUSE	2.11	141.04	12500	11300	1	0.9	12500	11300	1	0.9	-	-	15	9	5	Carbamidomethylation; TMT6plex	28538	Acidic leucine-rich nuclear phosphoprotein 32 family member A OS=Mus musculus GN=Anp32a PE=1 SV=1
1867	3137	Q9JIF7|COPB_MOUSE	1.61	140.99	1150	941.424	1	0.82	1150	941.424	1	0.82	-	-	2	6	1	TMT6plex	107066	Coatomer subunit beta OS=Mus musculus GN=Copb1 PE=1 SV=1
1088	1541	Q9WVE8|PACN2_MOUSE	3.04	140.9	4710	4250	1	0.9	4710	4250	1	0.9	-	-	11	9	6	TMT6plex	55833	Protein kinase C and casein kinase substrate in neurons protein 2 OS=Mus musculus GN=Pacsin2 PE=1 SV=1
1173	2725	O55022|PGRC1_MOUSE	1.4	140.61	12900	11800	1	0.91	12900	11800	1	0.91	-	-	25	6	5	Carbamidomethylation; TMT6plex; Deamidation (NQ)	21694	Membrane-associated progesterone receptor component 1 OS=Mus musculus GN=Pgrmc1 PE=1 SV=4
2367	3072	O35226|PSMD4_MOUSE	1.61	140.27	2520	2420	1	0.96	2520	2420	1	0.96	-	-	11	3	3	Carbamidomethylation; TMT6plex	40704	26S proteasome non-ATPase regulatory subunit 4 OS=Mus musculus GN=Psmd4 PE=1 SV=1
1831	2436	Q9JM14|NT5C_MOUSE	1.81	140.21	3580	3600	1	1.01	3580	3600	1	1.01	-	-	39	5	5	Carbamidomethylation; TMT6plex	23076	5'(3')-deoxyribonucleotidase cytosolic type OS=Mus musculus GN=Nt5c PE=1 SV=1
1902	2617	P52196|THTR_MOUSE	2.16	140.15	2510	2570	1	1.02	2510	2570	1	1.02	-	-	18	5	4	TMT6plex	33466	Thiosulfate sulfurtransferase OS=Mus musculus GN=Tst PE=1 SV=3
834	1835	P24369|PPIB_MOUSE	1.24	140.12	9820	8980	1	0.91	9820	8980	1	0.91	-	-	34	10	8	TMT6plex; Deamidation (NQ)	23713	Peptidyl-prolyl cis-trans isomerase B OS=Mus musculus GN=Ppib PE=1 SV=2
1005	1772	Q8BL66|EEA1_MOUSE	4.33	139.8	1410	1460	1	1.04	1410	1460	1	1.04	-	-	4	9	5	TMT6plex	160914	Early endosome antigen 1 OS=Mus musculus GN=Eea1 PE=1 SV=2
3098	2751	tr|D3Z2J6|D3Z2J6_MOUSE	2.31	139.58	482	649.505	1	1.35	482	649.505	1	1.35	-	-	5	1	1	TMT6plex	29591	Thioredoxin-related transmembrane protein 2 OS=Mus musculus GN=Tmx2 PE=1 SV=1
3098	2752	Q9D710|TMX2_MOUSE	2.31	139.58	482	649.505	1	1.35	482	649.505	1	1.35	-	-	4	1	1	TMT6plex	33943	Thioredoxin-related transmembrane protein 2 OS=Mus musculus GN=Tmx2 PE=1 SV=1
1673	2224	tr|A0A0R4J0F6|A0A0R4J0F6_MOUSE	5.63	139.55	1190	800.539	1	0.67	1190	800.539	1	0.67	-	-	2	8	3	TMT6plex	143670	Cyclin-G-associated kinase OS=Mus musculus GN=Gak PE=1 SV=1
1673	2225	Q99KY4|GAK_MOUSE	5.63	139.55	1190	800.539	1	0.67	1190	800.539	1	0.67	-	-	2	8	3	TMT6plex	143640	Cyclin-G-associated kinase OS=Mus musculus GN=Gak PE=1 SV=2
1787	2530	Q8R317|UBQL1_MOUSE	3.6	139.45	961	938.439	1	0.98	961	938.439	1	0.98	-	-	4	6	2	TMT6plex; Deamidation (NQ)	61976	Ubiquilin-1 OS=Mus musculus GN=Ubqln1 PE=1 SV=1
1580	3158	Q61820|RANT_MOUSE	1.76	139.01	4350	4010	1	0.92	4350	4010	1	0.92	-	-	6	4	1	TMT6plex	24452	GTP-binding nuclear protein Ran testis-specific isoform OS=Mus musculus GN=Rasl2-9 PE=2 SV=1
1254	2550	Q8CCT4|TCAL5_MOUSE	5.49	138.95	6560	4780	1	0.73	6560	4780	1	0.73	-	-	16	3	3	TMT6plex	22038	Transcription elongation factor A protein-like 5 OS=Mus musculus GN=Tceal5 PE=1 SV=1
1504	2324	tr|A0A0A6YX33|A0A0A6YX33_MOUSE	3.36	138.92	924	613.687	1	0.66	924	613.687	1	0.66	-	-	1	5	1	TMT6plex	64927	Serine/threonine-protein kinase DCLK2 OS=Mus musculus GN=Dclk2 PE=1 SV=1
1504	2335	tr|A0A0A6YWI6|A0A0A6YWI6_MOUSE	3.36	138.92	924	613.687	1	0.66	924	613.687	1	0.66	-	-	1	5	1	TMT6plex	70415	Serine/threonine-protein kinase DCLK2 OS=Mus musculus GN=Dclk2 PE=1 SV=1
1504	2343	tr|A0A0A6YX71|A0A0A6YX71_MOUSE	3.36	138.92	924	613.687	1	0.66	924	613.687	1	0.66	-	-	1	5	1	TMT6plex	78053	Serine/threonine-protein kinase DCLK2 OS=Mus musculus GN=Dclk2 PE=1 SV=1
1504	2361	Q6PGN3|DCLK2_MOUSE	3.36	138.92	924	613.687	1	0.66	924	613.687	1	0.66	-	-	1	5	1	TMT6plex	82979	Serine/threonine-protein kinase DCLK2 OS=Mus musculus GN=Dclk2 PE=1 SV=1
1561	2438	Q925E7|2ABD_MOUSE	1.5	138.72	329	283.562	1	0.86	329	283.562	1	0.86	-	-	4	4	1	TMT6plex	51958	Serine/threonine-protein phosphatase 2A 55 kDa regulatory subunit B delta isoform OS=Mus musculus GN=Ppp2r2d PE=1 SV=1
2091	1976	Q9JHK4|PGTA_MOUSE	1.35	138.41	1790	1770	1	0.99	1790	1770	1	0.99	-	-	7	5	5	Carbamidomethylation; TMT6plex	64990	Geranylgeranyl transferase type-2 subunit alpha OS=Mus musculus GN=Rabggta PE=1 SV=1
1821	2392	Q9DCS3|MECR_MOUSE	1.22	138.27	865	910.979	1	1.05	865	910.979	1	1.05	-	-	6	5	2	Carbamidomethylation; TMT6plex	40343	Enoyl-[acyl-carrier-protein] reductase mitochondrial OS=Mus musculus GN=Mecr PE=1 SV=2
1820	2072	Q06890|CLUS_MOUSE	4.24	138.24	2680	2020	1	0.75	2680	2020	1	0.75	-	-	7	5	3	TMT6plex	51656	Clusterin OS=Mus musculus GN=Clu PE=1 SV=1
1310	3060	tr|A0A1W2P7A1|A0A1W2P7A1_MOUSE	6.41	138.23	8940	6340	1	0.71	8940	6340	1	0.71	-	-	35	6	5	Carbamidomethylation; TMT6plex	15979	40S ribosomal protein S12 OS=Mus musculus GN=Rps12 PE=1 SV=1
1310	3151	tr|Q6ZWZ6|Q6ZWZ6_MOUSE	6.41	138.23	8940	6340	1	0.71	8940	6340	1	0.71	-	-	39	6	5	Carbamidomethylation; TMT6plex	14515	40S ribosomal protein S12 OS=Mus musculus GN=Rps12 PE=1 SV=1
1310	3152	tr|F7AEH4|F7AEH4_MOUSE	6.41	138.23	8940	6340	1	0.71	8940	6340	1	0.71	-	-	38	6	5	Carbamidomethylation; TMT6plex	15181	40S ribosomal protein S12 OS=Mus musculus GN=Rps12 PE=1 SV=1
1475	3375	tr|F6ZFT1|F6ZFT1_MOUSE	3.08	138.08	7620	8680	1	1.14	7620	8680	1	1.14	-	-	36	7	5	Carbamidomethylation; TMT6plex	14309	Acyl carrier protein (Fragment) OS=Mus musculus GN=Ndufab1 PE=1 SV=1
1475	3376	tr|F8WJ64|F8WJ64_MOUSE	3.08	138.08	7620	8680	1	1.14	7620	8680	1	1.14	-	-	36	7	5	Carbamidomethylation; TMT6plex	14428	Acyl carrier protein (Fragment) OS=Mus musculus GN=Ndufab1 PE=1 SV=1
1475	3392	Q9CR21|ACPM_MOUSE	3.08	138.08	7620	8680	1	1.14	7620	8680	1	1.14	-	-	29	7	5	Carbamidomethylation; TMT6plex	17370	Acyl carrier protein mitochondrial OS=Mus musculus GN=Ndufab1 PE=1 SV=1
2736	2472	P10518|HEM2_MOUSE	2.44	138.05	1080	1280	1	1.19	1080	1280	1	1.19	-	-	6	2	2	TMT6plex	36024	Delta-aminolevulinic acid dehydratase OS=Mus musculus GN=Alad PE=1 SV=1
1049	2986	P70188|KIFA3_MOUSE	1.63	137.92	279	317.589	1	1.14	279	317.589	1	1.14	-	-	1	7	1	TMT6plex	91291	Kinesin-associated protein 3 OS=Mus musculus GN=Kifap3 PE=1 SV=1
2381	2363	Q9ERI6|RDH14_MOUSE	3.38	137.8	1050	1060	1	1.01	1050	1060	1	1.01	-	-	7	5	3	TMT6plex	36366	Retinol dehydrogenase 14 OS=Mus musculus GN=Rdh14 PE=1 SV=1
2905	3115	tr|A0A0G2JES3|A0A0G2JES3_MOUSE	4.99	137.79	342	196.404	1	0.57	342	196.404	1	0.57	-	-	5	2	1	TMT6plex	21741	60S ribosomal protein L9 (Fragment) OS=Mus musculus GN=Rpl9 PE=1 SV=1
2905	3116	P51410|RL9_MOUSE	4.99	137.79	342	196.404	1	0.57	342	196.404	1	0.57	-	-	5	2	1	TMT6plex	21881	60S ribosomal protein L9 OS=Mus musculus GN=Rpl9 PE=2 SV=2
2905	3117	tr|A0A140T8T4|A0A140T8T4_MOUSE	4.99	137.79	342	196.404	1	0.57	342	196.404	1	0.57	-	-	5	2	1	TMT6plex	21853	Uncharacterized protein OS=Mus musculus GN=Rpl9-ps6 PE=4 SV=1
1738	2086	tr|Q8CBC8|Q8CBC8_MOUSE	0.61	137.78	4180	4340	1	1.04	4180	4340	1	1.04	-	-	16	8	6	TMT6plex; Deamidation (NQ)	49901	Branched-chain-amino-acid aminotransferase OS=Mus musculus GN=Bcat1 PE=1 SV=1
1738	2090	P24288|BCAT1_MOUSE	0.61	137.78	4180	4340	1	1.04	4180	4340	1	1.04	-	-	19	8	6	TMT6plex; Deamidation (NQ)	42791	Branched-chain-amino-acid aminotransferase cytosolic OS=Mus musculus GN=Bcat1 PE=1 SV=2
1738	2121	tr|E9Q4K3|E9Q4K3_MOUSE	0.61	137.78	4180	4340	1	1.04	4180	4340	1	1.04	-	-	18	8	6	TMT6plex; Deamidation (NQ)	43518	Branched-chain-amino-acid aminotransferase OS=Mus musculus GN=Bcat1 PE=1 SV=1
904	2695	Q924N4|S12A6_MOUSE	1.18	137.59	228	260.28	1	1.14	228	260.28	1	1.14	-	-	1	8	1	TMT6plex; Deamidation (NQ)	127527	Solute carrier family 12 member 6 OS=Mus musculus GN=Slc12a6 PE=1 SV=2
2582	3700	P60867|RS20_MOUSE	9.28	137.49	4020	2850	1	0.71	4020	2850	1	0.71	-	-	25	3	3	Carbamidomethylation; TMT6plex	13373	40S ribosomal protein S20 OS=Mus musculus GN=Rps20 PE=1 SV=1
1807	2252	O70435|PSA3_MOUSE	2.86	137.46	6070	4920	1	0.81	6070	4920	1	0.81	-	-	24	8	7	TMT6plex	28405	Proteasome subunit alpha type-3 OS=Mus musculus GN=Psma3 PE=1 SV=3
898	4111	tr|F8WIX8|F8WIX8_MOUSE	2.04	137.35	266	284.755	1	1.07	266	284.755	1	1.07	-	-	9	5	1	TMT6plex	13607	Histone H2A OS=Mus musculus GN=Hist1h2al PE=3 SV=1
898	4112	tr|A0A0N4SV66|A0A0N4SV66_MOUSE	2.04	137.35	266	284.755	1	1.07	266	284.755	1	1.07	-	-	9	5	1	TMT6plex	13660	Histone H2A OS=Mus musculus GN=H2afj PE=1 SV=1
898	4113	Q8CGP6|H2A1H_MOUSE	2.04	137.35	266	284.755	1	1.07	266	284.755	1	1.07	-	-	9	5	1	TMT6plex	13950	Histone H2A type 1-H OS=Mus musculus GN=Hist1h2ah PE=1 SV=3
898	4114	Q64523|H2A2C_MOUSE	2.04	137.35	266	284.755	1	1.07	266	284.755	1	1.07	-	-	9	5	1	TMT6plex	13988	Histone H2A type 2-C OS=Mus musculus GN=Hist2h2ac PE=1 SV=3
898	4115	tr|Q8CGP4|Q8CGP4_MOUSE	2.04	137.35	266	284.755	1	1.07	266	284.755	1	1.07	-	-	9	5	1	TMT6plex	14056	Histone H2A OS=Mus musculus GN=Hist1h2aa PE=1 SV=1
898	4116	Q8R1M2|H2AJ_MOUSE	2.04	137.35	266	284.755	1	1.07	266	284.755	1	1.07	-	-	9	5	1	TMT6plex	14045	Histone H2A.J OS=Mus musculus GN=H2afj PE=1 SV=1
898	4117	C0HKE4|H2A1E_MOUSE	2.04	137.35	266	284.755	1	1.07	266	284.755	1	1.07	-	-	8	5	1	TMT6plex	14135	Histone H2A type 1-E OS=Mus musculus GN=Hist1h2ae PE=1 SV=1
898	4118	C0HKE5|H2A1G_MOUSE	2.04	137.35	266	284.755	1	1.07	266	284.755	1	1.07	-	-	8	5	1	TMT6plex	14135	Histone H2A type 1-G OS=Mus musculus GN=Hist1h2ag PE=1 SV=1
898	4119	Q8CGP7|H2A1K_MOUSE	2.04	137.35	266	284.755	1	1.07	266	284.755	1	1.07	-	-	8	5	1	TMT6plex	14150	Histone H2A type 1-K OS=Mus musculus GN=Hist1h2ak PE=1 SV=3
898	4120	C0HKE7|H2A1N_MOUSE	2.04	137.35	266	284.755	1	1.07	266	284.755	1	1.07	-	-	8	5	1	TMT6plex	14135	Histone H2A type 1-N OS=Mus musculus GN=Hist1h2an PE=1 SV=1
898	4121	C0HKE3|H2A1D_MOUSE	2.04	137.35	266	284.755	1	1.07	266	284.755	1	1.07	-	-	8	5	1	TMT6plex	14135	Histone H2A type 1-D OS=Mus musculus GN=Hist1h2ad PE=1 SV=1
898	4122	Q8BFU2|H2A3_MOUSE	2.04	137.35	266	284.755	1	1.07	266	284.755	1	1.07	-	-	8	5	1	TMT6plex	14121	Histone H2A type 3 OS=Mus musculus GN=Hist3h2a PE=1 SV=3
898	4123	C0HKE6|H2A1I_MOUSE	2.04	137.35	266	284.755	1	1.07	266	284.755	1	1.07	-	-	8	5	1	TMT6plex	14135	Histone H2A type 1-I OS=Mus musculus GN=Hist1h2ai PE=1 SV=1
898	4124	C0HKE8|H2A1O_MOUSE	2.04	137.35	266	284.755	1	1.07	266	284.755	1	1.07	-	-	8	5	1	TMT6plex	14135	Histone H2A type 1-O OS=Mus musculus GN=Hist1h2ao PE=1 SV=1
898	4125	C0HKE1|H2A1B_MOUSE	2.04	137.35	266	284.755	1	1.07	266	284.755	1	1.07	-	-	8	5	1	TMT6plex	14135	Histone H2A type 1-B OS=Mus musculus GN=Hist1h2ab PE=1 SV=1
898	4126	C0HKE2|H2A1C_MOUSE	2.04	137.35	266	284.755	1	1.07	266	284.755	1	1.07	-	-	8	5	1	TMT6plex	14135	Histone H2A type 1-C OS=Mus musculus GN=Hist1h2ac PE=1 SV=1
898	4127	Q6GSS7|H2A2A_MOUSE	2.04	137.35	266	284.755	1	1.07	266	284.755	1	1.07	-	-	8	5	1	TMT6plex	14095	Histone H2A type 2-A OS=Mus musculus GN=Hist2h2aa1 PE=1 SV=3
898	4128	Q8CGP5|H2A1F_MOUSE	2.04	137.35	266	284.755	1	1.07	266	284.755	1	1.07	-	-	8	5	1	TMT6plex	14162	Histone H2A type 1-F OS=Mus musculus GN=Hist1h2af PE=1 SV=3
898	4129	C0HKE9|H2A1P_MOUSE	2.04	137.35	266	284.755	1	1.07	266	284.755	1	1.07	-	-	8	5	1	TMT6plex	14135	Histone H2A type 1-P OS=Mus musculus GN=Hist1h2ap PE=1 SV=1
809	2853	tr|G3X9Y9|G3X9Y9_MOUSE	7.4	137.18	897	1130	1	1.26	897	1130	1	1.26	-	-	1	10	2	TMT6plex	213412	Myosin Vb isoform CRA_a OS=Mus musculus GN=Myo5b PE=1 SV=1
1340	1861	Q8BVQ5|PPME1_MOUSE	0.76	137.18	1700	1640	1	0.96	1700	1640	1	0.96	-	-	15	5	5	Carbamidomethylation; TMT6plex	42256	Protein phosphatase methylesterase 1 OS=Mus musculus GN=Ppme1 PE=1 SV=5
868	2886	Q9D0M5|DYL2_MOUSE	1.89	137.14	44900	40800	1	0.91	44900	40800	1	0.91	-	-	33	7	2	Carbamidomethylation; TMT6plex	10350	Dynein light chain 2 cytoplasmic OS=Mus musculus GN=Dynll2 PE=1 SV=1
1743	5274	P50114|S100B_MOUSE	1.62	136.77	4740	4700	1	0.99	4740	4700	1	0.99	-	-	40	3	3	TMT6plex; Oxidation (M)	10728	Protein S100-B OS=Mus musculus GN=S100b PE=1 SV=2
2901	2882	Q9QXT0|CNPY2_MOUSE	1.89	136.64	304	343.856	1	1.13	304	343.856	1	1.13	-	-	9	1	1	TMT6plex	20767	Protein canopy homolog 2 OS=Mus musculus GN=Cnpy2 PE=1 SV=1
2901	2894	tr|A0A1W2P729|A0A1W2P729_MOUSE	1.89	136.64	304	343.856	1	1.13	304	343.856	1	1.13	-	-	12	1	1	TMT6plex	15316	Protein canopy homolog 2 (Fragment) OS=Mus musculus GN=Cnpy2 PE=1 SV=1
593	4026	tr|Q4VWZ5|Q4VWZ5_MOUSE	3.81	136.63	54200	45300	1	0.84	54200	45300	1	0.84	-	-	30	4	3	TMT6plex; Oxidation (M)	15229	Acyl-CoA-binding protein OS=Mus musculus GN=Dbi PE=1 SV=1
593	4063	P31786|ACBP_MOUSE	3.81	136.63	54200	45300	1	0.84	54200	45300	1	0.84	-	-	46	4	3	TMT6plex; Oxidation (M)	10000	Acyl-CoA-binding protein OS=Mus musculus GN=Dbi PE=1 SV=2
2706	2326	Q62446|FKBP3_MOUSE	1.2	136.57	2900	2740	1	0.94	2900	2740	1	0.94	-	-	26	6	5	TMT6plex	25148	Peptidyl-prolyl cis-trans isomerase FKBP3 OS=Mus musculus GN=Fkbp3 PE=1 SV=2
2610	2118	Q80X50|UBP2L_MOUSE	2.49	136.46	2620	2290	1	0.87	2620	2290	1	0.87	-	-	5	5	5	TMT6plex	116799	Ubiquitin-associated protein 2-like OS=Mus musculus GN=Ubap2l PE=1 SV=1
1406	2583	Q8C650|SEP10_MOUSE	8.81	136.41	777	431.014	1	0.55	777	431.014	1	0.55	-	-	6	5	2	TMT6plex	52422	Septin-10 OS=Mus musculus GN=Sept10 PE=1 SV=1
1406	2584	tr|A0A1W2P6J7|A0A1W2P6J7_MOUSE	8.81	136.41	777	431.014	1	0.55	777	431.014	1	0.55	-	-	6	5	2	TMT6plex	52436	Septin 10 OS=Mus musculus GN=Sept10 PE=1 SV=1
1406	2586	tr|A0A0R4J233|A0A0R4J233_MOUSE	8.81	136.41	777	431.014	1	0.55	777	431.014	1	0.55	-	-	7	5	2	TMT6plex	49829	Septin-10 OS=Mus musculus GN=Sept10 PE=1 SV=1
1892	2823	Q791T5|MTCH1_MOUSE	3.95	136.36	551	719.948	1	1.31	551	719.948	1	1.31	-	-	6	2	2	TMT6plex	41565	Mitochondrial carrier homolog 1 OS=Mus musculus GN=Mtch1 PE=1 SV=1
1745	2837	P61971|NTF2_MOUSE	3.16	136.34	4350	4780	1	1.1	4350	4780	1	1.1	-	-	75	6	6	Carbamidomethylation; TMT6plex	14478	Nuclear transport factor 2 OS=Mus musculus GN=Nutf2 PE=1 SV=1
2290	3249	Q9CWE0|MFR1L_MOUSE	0.57	136.26	995	930.082	1	0.93	995	930.082	1	0.93	-	-	6	2	1	TMT6plex	31726	Mitochondrial fission regulator 1-like OS=Mus musculus GN=Mtfr1l PE=1 SV=1
373	2833	Q6ZWR6|SYNE1_MOUSE	2.71	136.2	1380	1340	1	0.97	1380	1340	1	0.97	-	-	1	22	4	TMT6plex; Deamidation (NQ)	1009946	Nesprin-1 OS=Mus musculus GN=Syne1 PE=1 SV=2
373	2834	tr|A0A1L1STC6|A0A1L1STC6_MOUSE	2.71	136.2	1380	1340	1	0.97	1380	1340	1	0.97	-	-	1	22	4	TMT6plex; Deamidation (NQ)	1009943	Nesprin-1 OS=Mus musculus GN=Syne1 PE=1 SV=1
1978	2037	Q60865|CAPR1_MOUSE	4.42	135.84	3790	2790	1	0.74	3790	2790	1	0.74	-	-	9	7	7	Carbamidomethylation; TMT6plex	78169	Caprin-1 OS=Mus musculus GN=Caprin1 PE=1 SV=2
926	2856	P62774|MTPN_MOUSE	4.5	135.76	11300	9790	1	0.86	11300	9790	1	0.86	-	-	34	7	6	Carbamidomethylation; TMT6plex; Acetylation (Protein N-term); Deamidation (NQ)	12861	Myotrophin OS=Mus musculus GN=Mtpn PE=1 SV=2
1998	2575	O70310|NMT1_MOUSE	1.72	135.74	1590	1420	1	0.89	1590	1420	1	0.89	-	-	8	5	3	TMT6plex	56888	Glycylpeptide N-tetradecanoyltransferase 1 OS=Mus musculus GN=Nmt1 PE=1 SV=1
2408	3042	tr|E9Q4M4|E9Q4M4_MOUSE	3.41	135.73	4150	3490	1	0.84	4150	3490	1	0.84	-	-	18	5	5	TMT6plex	26388	MICOS complex subunit OS=Mus musculus GN=Chchd6 PE=1 SV=1
3143	2991	Q9D6J5|NDUB8_MOUSE	3.36	135.72	3240	3470	1	1.07	3240	3470	1	1.07	-	-	20	3	3	TMT6plex	21876	NADH dehydrogenase [ubiquinone] 1 beta subcomplex subunit 8 mitochondrial OS=Mus musculus GN=Ndufb8 PE=1 SV=1
1620	1753	O54988|SLK_MOUSE	4.03	135.71	1030	807.703	1	0.78	1030	807.703	1	0.78	-	-	2	4	2	TMT6plex	141457	STE20-like serine/threonine-protein kinase OS=Mus musculus GN=Slk PE=1 SV=2
2396	3029	Q9CRB6|TPPP3_MOUSE	3.78	135.68	2940	2900	1	0.99	2940	2900	1	0.99	-	-	28	4	4	Carbamidomethylation; TMT6plex	18965	Tubulin polymerization-promoting protein family member 3 OS=Mus musculus GN=Tppp3 PE=1 SV=1
2717	2637	O70503|DHB12_MOUSE	3.57	135.67	2100	1950	1	0.93	2100	1950	1	0.93	-	-	13	3	3	TMT6plex	34742	Very-long-chain 3-oxoacyl-CoA reductase OS=Mus musculus GN=Hsd17b12 PE=1 SV=1
2006	2189	Q8BTG7|NDRG4_MOUSE	2.99	135.66	2110	1930	1	0.91	2110	1930	1	0.91	-	-	7	3	2	TMT6plex	38509	Protein NDRG4 OS=Mus musculus GN=Ndrg4 PE=1 SV=1
1905	1758	Q8R4N0|CLYBL_MOUSE	1.25	135.58	2750	2600	1	0.94	2750	2600	1	0.94	-	-	10	4	4	Carbamidomethylation; TMT6plex	37549	Citrate lyase subunit beta-like protein mitochondrial OS=Mus musculus GN=Clybl PE=1 SV=2
1717	2846	P32037|GTR3_MOUSE	1.63	135.54	5040	4630	1	0.92	5040	4630	1	0.92	-	-	9	5	4	TMT6plex	53479	Solute carrier family 2 facilitated glucose transporter member 3 OS=Mus musculus GN=Slc2a3 PE=1 SV=1
803	2082	P11404|FABPH_MOUSE	4.37	135.53	39900	33200	1	0.83	39900	33200	1	0.83	-	-	43	7	6	TMT6plex; Oxidation (M); Deamidation (NQ)	14819	Fatty acid-binding protein heart OS=Mus musculus GN=Fabp3 PE=1 SV=5
699	2505	tr|A2CG35|A2CG35_MOUSE	2.98	135.53	706	668.608	1	0.95	706	668.608	1	0.95	-	-	7	5	2	TMT6plex	32238	Ras-related protein Rab-12 OS=Mus musculus GN=Rab12 PE=1 SV=1
1778	2443	Q8CGF6|WDR47_MOUSE	1.75	135.49	1220	1270	1	1.05	1220	1270	1	1.05	-	-	5	6	4	Carbamidomethylation; TMT6plex	102312	WD repeat-containing protein 47 OS=Mus musculus GN=Wdr47 PE=1 SV=2
2012	1973	O08529|CAN2_MOUSE	3.11	135.4	1790	1460	1	0.82	1790	1460	1	0.82	-	-	4	4	3	Carbamidomethylation; TMT6plex	79872	Calpain-2 catalytic subunit OS=Mus musculus GN=Capn2 PE=1 SV=4
1916	2670	tr|A0A4W9|A0A4W9_MOUSE	4	135.35	1620	1360	1	0.84	1620	1360	1	0.84	-	-	14	4	3	TMT6plex; Deamidation (NQ)	36118	Neuronal growth regulator 1 OS=Mus musculus GN=Negr1 PE=1 SV=1
1916	2671	tr|D3Z4T6|D3Z4T6_MOUSE	4	135.35	1620	1360	1	0.84	1620	1360	1	0.84	-	-	14	4	3	TMT6plex; Deamidation (NQ)	36208	Neuronal growth regulator 1 OS=Mus musculus GN=Negr1 PE=1 SV=1
1916	2672	Q80Z24|NEGR1_MOUSE	4	135.35	1620	1360	1	0.84	1620	1360	1	0.84	-	-	13	4	3	TMT6plex; Deamidation (NQ)	37900	Neuronal growth regulator 1 OS=Mus musculus GN=Negr1 PE=1 SV=1
1803	2876	Q8R326|PSPC1_MOUSE	4.75	135.26	1350	1020	1	0.76	1350	1020	1	0.76	-	-	8	4	3	TMT6plex	58758	Paraspeckle component 1 OS=Mus musculus GN=Pspc1 PE=1 SV=1
1530	3740	Q9CQ69|QCR8_MOUSE	4.72	135.25	9510	11000	1	1.16	9510	11000	1	1.16	-	-	45	5	5	TMT6plex	9768	Cytochrome b-c1 complex subunit 8 OS=Mus musculus GN=Uqcrq PE=1 SV=3
3362	2461	P24668|MPRD_MOUSE	4.01	135.21	1050	1010	1	0.96	1050	1010	1	0.96	-	-	8	2	2	TMT6plex	31172	Cation-dependent mannose-6-phosphate receptor OS=Mus musculus GN=M6pr PE=1 SV=1
2274	2768	A2RT62|FXL16_MOUSE	4.3	135.15	1520	1090	1	0.72	1520	1090	1	0.72	-	-	6	2	2	TMT6plex; Deamidation (NQ)	51878	F-box/LRR-repeat protein 16 OS=Mus musculus GN=Fbxl16 PE=1 SV=1
2750	2548	tr|Q3TL72|Q3TL72_MOUSE	3.2	135.11	241	282.965	1	1.17	241	282.965	1	1.17	-	-	2	1	1	TMT6plex	49957	NEDD8-activating enzyme E1 catalytic subunit OS=Mus musculus GN=Uba3 PE=1 SV=1
2750	2549	Q8C878|UBA3_MOUSE	3.2	135.11	241	282.965	1	1.17	241	282.965	1	1.17	-	-	2	1	1	TMT6plex	51737	NEDD8-activating enzyme E1 catalytic subunit OS=Mus musculus GN=Uba3 PE=1 SV=2
1625	1963	P27659|RL3_MOUSE	1.67	134.9	6110	5290	1	0.87	6110	5290	1	0.87	-	-	12	8	6	Carbamidomethylation; TMT6plex	46110	60S ribosomal protein L3 OS=Mus musculus GN=Rpl3 PE=1 SV=3
1334	2116	tr|D3Z041|D3Z041_MOUSE	4.24	134.89	1850	1520	1	0.82	1850	1520	1	0.82	-	-	5	6	3	TMT6plex	78035	Long-chain-fatty-acid--CoA ligase 1 OS=Mus musculus GN=Acsl1 PE=1 SV=1
1334	2117	P41216|ACSL1_MOUSE	4.24	134.89	1850	1520	1	0.82	1850	1520	1	0.82	-	-	5	6	3	TMT6plex	77952	Long-chain-fatty-acid--CoA ligase 1 OS=Mus musculus GN=Acsl1 PE=1 SV=2
1367	2304	tr|H3BKD4|H3BKD4_MOUSE	2.53	134.88	1140	1070	1	0.93	1140	1070	1	0.93	-	-	2	7	2	TMT6plex; Deamidation (NQ)	120100	Arf-GAP with SH3 domain ANK repeat and PH domain-containing protein 1 OS=Mus musculus GN=Asap1 PE=1 SV=1
1367	2307	tr|H3BKE6|H3BKE6_MOUSE	2.53	134.88	1140	1070	1	0.93	1140	1070	1	0.93	-	-	2	7	2	TMT6plex; Deamidation (NQ)	121275	Arf-GAP with SH3 domain ANK repeat and PH domain-containing protein 1 OS=Mus musculus GN=Asap1 PE=1 SV=1
1367	2310	tr|E9QMI7|E9QMI7_MOUSE	2.53	134.88	1140	1070	1	0.93	1140	1070	1	0.93	-	-	2	7	2	TMT6plex; Deamidation (NQ)	121644	Arf-GAP with SH3 domain ANK repeat and PH domain-containing protein 1 OS=Mus musculus GN=Asap1 PE=1 SV=2
1367	2312	tr|E9QMJ1|E9QMJ1_MOUSE	2.53	134.88	1140	1070	1	0.93	1140	1070	1	0.93	-	-	2	7	2	TMT6plex; Deamidation (NQ)	123534	Arf-GAP with SH3 domain ANK repeat and PH domain-containing protein 1 OS=Mus musculus GN=Asap1 PE=1 SV=1
1367	2313	tr|H3BL41|H3BL41_MOUSE	2.53	134.88	1140	1070	1	0.93	1140	1070	1	0.93	-	-	2	7	2	TMT6plex; Deamidation (NQ)	124709	Arf-GAP with SH3 domain ANK repeat and PH domain-containing protein 1 OS=Mus musculus GN=Asap1 PE=1 SV=1
1367	2315	tr|H3BJY2|H3BJY2_MOUSE	2.53	134.88	1140	1070	1	0.93	1140	1070	1	0.93	-	-	2	7	2	TMT6plex; Deamidation (NQ)	127022	Arf-GAP with SH3 domain ANK repeat and PH domain-containing protein 1 OS=Mus musculus GN=Asap1 PE=1 SV=1
1367	2316	tr|E9QN63|E9QN63_MOUSE	2.53	134.88	1140	1070	1	0.93	1140	1070	1	0.93	-	-	2	7	2	TMT6plex; Deamidation (NQ)	127390	Arf-GAP with SH3 domain ANK repeat and PH domain-containing protein 1 OS=Mus musculus GN=Asap1 PE=1 SV=2
1367	2317	Q9QWY8|ASAP1_MOUSE	2.53	134.88	1140	1070	1	0.93	1140	1070	1	0.93	-	-	2	7	2	TMT6plex; Deamidation (NQ)	127421	Arf-GAP with SH3 domain ANK repeat and PH domain-containing protein 1 OS=Mus musculus GN=Asap1 PE=1 SV=2
2903	2964	Q924M7|MPI_MOUSE	1.99	134.86	483	407.135	1	0.84	483	407.135	1	0.84	-	-	2	1	1	Carbamidomethylation; TMT6plex	46575	Mannose-6-phosphate isomerase OS=Mus musculus GN=Mpi PE=1 SV=1
1724	2750	Q9D1E6|TBCB_MOUSE	0.54	134.74	2420	2310	1	0.95	2420	2310	1	0.95	-	-	15	4	4	TMT6plex	27386	Tubulin-folding cofactor B OS=Mus musculus GN=Tbcb PE=1 SV=2
1134	3584	Q91WS0|CISD1_MOUSE	2.59	134.7	17600	18500	1	1.05	17600	18500	1	1.05	-	-	34	3	3	TMT6plex; Oxidation (M)	12097	CDGSH iron-sulfur domain-containing protein 1 OS=Mus musculus GN=Cisd1 PE=1 SV=1
1922	2243	Q8CHP8|PGP_MOUSE	1.37	134.53	2810	2790	1	0.99	2810	2790	1	0.99	-	-	10	3	3	TMT6plex	34541	Glycerol-3-phosphate phosphatase OS=Mus musculus GN=Pgp PE=1 SV=1
1202	2216	B9EJA2|CTTB2_MOUSE	0.23	134.51	1170	1160	1	0.99	1170	1160	1	0.99	-	-	1	4	1	TMT6plex; Deamidation (NQ)	178773	Cortactin-binding protein 2 OS=Mus musculus GN=Cttnbp2 PE=1 SV=2
1897	2318	Q91ZP9|NECA2_MOUSE	3.93	134.43	1810	1390	1	0.77	1810	1390	1	0.77	-	-	9	4	4	TMT6plex	43441	N-terminal EF-hand calcium-binding protein 2 OS=Mus musculus GN=Necab2 PE=1 SV=1
2100	2521	Q8BWG8|ARRB1_MOUSE	3.44	134.4	3200	2730	1	0.86	3200	2730	1	0.86	-	-	11	4	4	Carbamidomethylation; TMT6plex	46973	Beta-arrestin-1 OS=Mus musculus GN=Arrb1 PE=1 SV=1
2100	2522	tr|J3QNU6|J3QNU6_MOUSE	3.44	134.4	3200	2730	1	0.86	3200	2730	1	0.86	-	-	11	4	4	Carbamidomethylation; TMT6plex	47107	Beta-arrestin-1 OS=Mus musculus GN=Arrb1 PE=1 SV=1
1885	1946	P22315|HEMH_MOUSE	1.8	134.24	3190	3460	1	1.09	3190	3460	1	1.09	-	-	18	9	7	TMT6plex	47130	Ferrochelatase mitochondrial OS=Mus musculus GN=Fech PE=1 SV=2
1885	1947	tr|Q544X6|Q544X6_MOUSE	1.8	134.24	3190	3460	1	1.09	3190	3460	1	1.09	-	-	18	9	7	TMT6plex	47422	Ferrochelatase OS=Mus musculus GN=Fech PE=1 SV=1
1002	3218	Q3THW5|H2AV_MOUSE	4.84	133.95	2970	3280	1	1.1	2970	3280	1	1.1	-	-	19	6	2	TMT6plex	13509	Histone H2A.V OS=Mus musculus GN=H2afv PE=1 SV=3
1002	3219	P0C0S6|H2AZ_MOUSE	4.84	133.95	2970	3280	1	1.1	2970	3280	1	1.1	-	-	19	6	2	TMT6plex	13553	Histone H2A.Z OS=Mus musculus GN=H2afz PE=1 SV=2
2393	2419	Q9ESM3|HPLN2_MOUSE	14.94	133.91	4240	6570	1	1.55	4240	6570	1	1.55	-	-	18	6	6	Carbamidomethylation; TMT6plex	37925	Hyaluronan and proteoglycan link protein 2 OS=Mus musculus GN=Hapln2 PE=1 SV=1
587	2453	O08585|CLCA_MOUSE	4.64	133.82	36200	27800	1	0.77	36200	27800	1	0.77	-	-	21	10	8	TMT6plex; Deamidation (NQ)	25604	Clathrin light chain A OS=Mus musculus GN=Clta PE=1 SV=2
587	2454	tr|B1AWD8|B1AWD8_MOUSE	4.64	133.82	36200	27800	1	0.77	36200	27800	1	0.77	-	-	21	10	8	TMT6plex; Deamidation (NQ)	25661	Clathrin light chain OS=Mus musculus GN=Clta PE=1 SV=1
587	2455	tr|B1AWD9|B1AWD9_MOUSE	4.64	133.82	36200	27800	1	0.77	36200	27800	1	0.77	-	-	20	10	8	TMT6plex; Deamidation (NQ)	27062	Clathrin light chain OS=Mus musculus GN=Clta PE=1 SV=1
3007	3298	Q99L13|3HIDH_MOUSE	0.7	133.72	755	719.948	1	0.95	755	719.948	1	0.95	-	-	9	2	2	TMT6plex	35440	3-hydroxyisobutyrate dehydrogenase mitochondrial OS=Mus musculus GN=Hibadh PE=1 SV=1
1890	1829	P22892|AP1G1_MOUSE	2.79	133.69	2100	2020	1	0.96	2100	2020	1	0.96	-	-	4	4	3	Carbamidomethylation; TMT6plex	91350	AP-1 complex subunit gamma-1 OS=Mus musculus GN=Ap1g1 PE=1 SV=3
1890	1830	tr|Q8CBB7|Q8CBB7_MOUSE	2.79	133.69	2100	2020	1	0.96	2100	2020	1	0.96	-	-	4	4	3	Carbamidomethylation; TMT6plex	91722	AP-1 complex subunit gamma-1 OS=Mus musculus GN=Ap1g1 PE=1 SV=1
2762	5510	Q9CR51|VATG1_MOUSE	0.94	133.68	507	516.977	1	1.02	507	516.977	1	1.02	-	-	9	1	1	TMT6plex	13724	V-type proton ATPase subunit G 1 OS=Mus musculus GN=Atp6v1g1 PE=1 SV=3
2917	3573	tr|Q8K356|Q8K356_MOUSE	7.62	133.63	1840	1280	1	0.7	1840	1280	1	0.7	-	-	19	3	3	Carbamidomethylation; TMT6plex	17028	Lymphocyte antigen 6 complex locus H OS=Mus musculus GN=Ly6h PE=1 SV=1
2917	3617	Q9WUC3|LY6H_MOUSE	7.62	133.63	1840	1280	1	0.7	1840	1280	1	0.7	-	-	22	3	3	Carbamidomethylation; TMT6plex	14669	Lymphocyte antigen 6H OS=Mus musculus GN=Ly6h PE=1 SV=2
1654	2689	Q06138|CAB39_MOUSE	2.44	133.57	1520	1550	1	1.02	1520	1550	1	1.02	-	-	8	9	4	TMT6plex	39843	Calcium-binding protein 39 OS=Mus musculus GN=Cab39 PE=1 SV=2
1914	2079	O35864|CSN5_MOUSE	2.04	133.53	2830	2680	1	0.95	2830	2680	1	0.95	-	-	19	5	5	Carbamidomethylation; TMT6plex	37549	COP9 signalosome complex subunit 5 OS=Mus musculus GN=Cops5 PE=1 SV=3
1562	1931	tr|A2AI17|A2AI17_MOUSE	6.09	133.44	2360	1830	1	0.78	2360	1830	1	0.78	-	-	5	8	5	TMT6plex; Deamidation (NQ)	103587	Glutamate receptor ionotropic NMDA 1 OS=Mus musculus GN=Grin1 PE=1 SV=1
1562	1934	P35438|NMDZ1_MOUSE	6.09	133.44	2360	1830	1	0.78	2360	1830	1	0.78	-	-	5	8	5	TMT6plex; Deamidation (NQ)	105481	Glutamate receptor ionotropic NMDA 1 OS=Mus musculus GN=Grin1 PE=1 SV=1
1562	1935	tr|A2AI14|A2AI14_MOUSE	6.09	133.44	2360	1830	1	0.78	2360	1830	1	0.78	-	-	5	8	5	TMT6plex; Deamidation (NQ)	106123	Glutamate receptor ionotropic NMDA 1 OS=Mus musculus GN=Grin1 PE=1 SV=1
1562	1938	tr|A2AI21|A2AI21_MOUSE	6.09	133.44	2360	1830	1	0.78	2360	1830	1	0.78	-	-	5	8	5	TMT6plex; Deamidation (NQ)	108017	Glutamate receptor ionotropic NMDA 1 OS=Mus musculus GN=Grin1 PE=1 SV=1
3132	2677	P70297|STAM1_MOUSE	4.37	133.39	2270	1770	1	0.78	2270	1770	1	0.78	-	-	5	3	3	TMT6plex	59771	Signal transducing adapter molecule 1 OS=Mus musculus GN=Stam PE=1 SV=3
3132	2708	tr|Q3UGN9|Q3UGN9_MOUSE	4.37	133.39	2270	1770	1	0.78	2270	1770	1	0.78	-	-	6	3	3	TMT6plex	51145	Putative uncharacterized protein OS=Mus musculus GN=Stam PE=1 SV=1
1912	2803	O35344|IMA4_MOUSE	2.62	133.3	1320	1160	1	0.88	1320	1160	1	0.88	-	-	4	3	2	TMT6plex	57773	Importin subunit alpha-4 OS=Mus musculus GN=Kpna3 PE=1 SV=1
2251	4970	P28184|MT3_MOUSE	16.68	133.25	2170	1450	1	0.67	2170	1450	1	0.67	-	-	46	2	2	Carbamidomethylation; TMT6plex; Oxidation (M); Acetylation (Protein N-term)	7009	Metallothionein-3 OS=Mus musculus GN=Mt3 PE=1 SV=1
1958	2366	Q9EQQ9|OGA_MOUSE	0.76	133.23	346	383.256	1	1.11	346	383.256	1	1.11	-	-	1	2	1	Carbamidomethylation; TMT6plex	103162	Protein O-GlcNAcase OS=Mus musculus GN=Mgea5 PE=1 SV=2
2015	2784	P63276|RS17_MOUSE	4.46	133.22	916	1000	1	1.09	916	1000	1	1.09	-	-	14	3	2	TMT6plex	15524	40S ribosomal protein S17 OS=Mus musculus GN=Rps17 PE=1 SV=2
3141	2911	P28798|GRN_MOUSE	1.51	132.89	1190	1090	1	0.92	1190	1090	1	0.92	-	-	6	4	3	Carbamidomethylation; TMT6plex	63458	Granulins OS=Mus musculus GN=Grn PE=1 SV=2
3141	2913	tr|Q3U9N4|Q3U9N4_MOUSE	1.51	132.89	1190	1090	1	0.92	1190	1090	1	0.92	-	-	6	4	3	Carbamidomethylation; TMT6plex	65018	Granulins OS=Mus musculus GN=Grn PE=1 SV=1
2204	2891	Q9QZ23|NFU1_MOUSE	2.5	132.45	823	823.821	1	1	823	823.821	1	1	-	-	10	3	2	TMT6plex	28568	NFU1 iron-sulfur cluster scaffold homolog mitochondrial OS=Mus musculus GN=Nfu1 PE=1 SV=2
2204	2893	tr|A0A0N4SUH8|A0A0N4SUH8_MOUSE	2.5	132.45	823	823.821	1	1	823	823.821	1	1	-	-	10	3	2	TMT6plex	28655	NFU1 iron-sulfur cluster scaffold homolog mitochondrial OS=Mus musculus GN=Nfu1 PE=1 SV=1
1262	3033	E9PUL5|PRRT2_MOUSE	2.51	132.42	1310	1060	1	0.82	1310	1060	1	0.82	-	-	12	2	2	TMT6plex	35924	Proline-rich transmembrane protein 2 OS=Mus musculus GN=Prrt2 PE=1 SV=1
3565	2644	Q3TW96|UAP1L_MOUSE	1.67	132.4	380	310.425	1	0.82	380	310.425	1	0.82	-	-	2	1	1	TMT6plex	56614	UDP-N-acetylhexosamine pyrophosphorylase-like protein 1 OS=Mus musculus GN=Uap1l1 PE=1 SV=1
3334	2827	tr|A0A0U1RPU8|A0A0U1RPU8_MOUSE	3.29	132.33	3190	2580	1	0.81	3190	2580	1	0.81	-	-	12	4	4	TMT6plex	38906	Protein tweety homolog OS=Mus musculus GN=Ttyh1 PE=1 SV=1
3334	2832	Q9D3A9|TTYH1_MOUSE	3.29	132.33	3190	2580	1	0.81	3190	2580	1	0.81	-	-	9	4	4	TMT6plex	49032	Protein tweety homolog 1 OS=Mus musculus GN=Ttyh1 PE=1 SV=1
2522	2517	Q8CGA0|PPM1F_MOUSE	3.79	132.29	2030	1900	1	0.94	2030	1900	1	0.94	-	-	11	4	4	TMT6plex	49611	Protein phosphatase 1F OS=Mus musculus GN=Ppm1f PE=1 SV=1
1764	1882	tr|E9Q2X2|E9Q2X2_MOUSE	0.68	131.95	2290	2290	1	1	2290	2290	1	1	-	-	5	9	5	TMT6plex; Deamidation (NQ)	153617	Neurexin-3-beta OS=Mus musculus GN=Nrxn3 PE=1 SV=1
1992	1997	Q99KR7|PPIF_MOUSE	2.85	131.73	2980	2510	1	0.84	2980	2510	1	0.84	-	-	11	5	3	TMT6plex	21737	Peptidyl-prolyl cis-trans isomerase F mitochondrial OS=Mus musculus GN=Ppif PE=1 SV=1
2141	2286	P70195|PSB7_MOUSE	2.28	131.58	6740	6590	1	0.98	6740	6590	1	0.98	-	-	22	8	8	TMT6plex	29891	Proteasome subunit beta type-7 OS=Mus musculus GN=Psmb7 PE=1 SV=1
2995	3209	Q9ER00|STX12_MOUSE	5.38	131.5	960	678.16	1	0.71	960	678.16	1	0.71	-	-	9	3	2	Carbamidomethylation; TMT6plex	31195	Syntaxin-12 OS=Mus musculus GN=Stx12 PE=1 SV=1
1327	2094	Q6IRU2|TPM4_MOUSE	1.28	131.47	664	586.823	1	0.88	664	586.823	1	0.88	-	-	10	5	2	TMT6plex	28468	Tropomyosin alpha-4 chain OS=Mus musculus GN=Tpm4 PE=1 SV=3
1514	2159	Q7TT50|MRCKB_MOUSE	2.67	131.22	355	252.519	1	0.71	355	252.519	1	0.71	-	-	1	8	1	TMT6plex	194751	Serine/threonine-protein kinase MRCK beta OS=Mus musculus GN=Cdc42bpb PE=1 SV=2
1660	2736	P51859|HDGF_MOUSE	4.35	131.19	2330	1890	1	0.81	2330	1890	1	0.81	-	-	11	3	3	Carbamidomethylation; TMT6plex	26269	Hepatoma-derived growth factor OS=Mus musculus GN=Hdgf PE=1 SV=2
2122	2167	tr|A0A0R4J138|A0A0R4J138_MOUSE	1.78	131.04	3160	3210	1	1.01	3160	3210	1	1.01	-	-	7	4	4	TMT6plex	59705	Arylsulfatase B OS=Mus musculus GN=Arsb PE=1 SV=1
2122	2168	P50429|ARSB_MOUSE	1.78	131.04	3160	3210	1	1.01	3160	3210	1	1.01	-	-	7	4	4	TMT6plex	59647	Arylsulfatase B OS=Mus musculus GN=Arsb PE=1 SV=3
1383	1990	P08003|PDIA4_MOUSE	1.49	130.85	2950	2740	1	0.93	2950	2740	1	0.93	-	-	6	8	4	TMT6plex	71982	Protein disulfide-isomerase A4 OS=Mus musculus GN=Pdia4 PE=1 SV=3
1383	1991	tr|A0A0R4J0Z1|A0A0R4J0Z1_MOUSE	1.49	130.85	2950	2740	1	0.93	2950	2740	1	0.93	-	-	6	8	4	TMT6plex	72370	Protein disulfide-isomerase A4 OS=Mus musculus GN=Pdia4 PE=1 SV=1
1729	2111	Q5PR73|DIRA2_MOUSE	1.44	130.82	5830	5260	1	0.9	5830	5260	1	0.9	-	-	29	7	5	TMT6plex	22498	GTP-binding protein Di-Ras2 OS=Mus musculus GN=Diras2 PE=1 SV=1
1746	3612	P10922|H10_MOUSE	46.46	130.8	5500	3920	1	0.71	5500	3920	1	0.71	-	-	16	4	4	TMT6plex	20861	Histone H1.0 OS=Mus musculus GN=H1f0 PE=2 SV=4
2394	2631	Q9D1D4|TMEDA_MOUSE	2.29	130.72	2050	2460	1	1.2	2050	2460	1	1.2	-	-	17	4	3	TMT6plex	24911	Transmembrane emp24 domain-containing protein 10 OS=Mus musculus GN=Tmed10 PE=1 SV=1
3318	3546	P62075|TIM13_MOUSE	3.74	130.44	2330	2060	1	0.88	2330	2060	1	0.88	-	-	53	4	4	Carbamidomethylation; TMT6plex	10458	Mitochondrial import inner membrane translocase subunit Tim13 OS=Mus musculus GN=Timm13 PE=1 SV=1
2019	2169	O70251|EF1B_MOUSE	2.99	130.34	12900	10500	1	0.81	12900	10500	1	0.81	-	-	21	7	5	TMT6plex	24694	Elongation factor 1-beta OS=Mus musculus GN=Eef1b PE=1 SV=5
1854	2097	Q8BUK6|HOOK3_MOUSE	13.96	130.28	3840	3360	1	0.87	3840	3360	1	0.87	-	-	5	4	3	TMT6plex	83218	Protein Hook homolog 3 OS=Mus musculus GN=Hook3 PE=1 SV=2
2740	3558	tr|G3UW85|G3UW85_MOUSE	1.4	130.15	2130	1870	1	0.88	2130	1870	1	0.88	-	-	15	4	2	TMT6plex	14355	Enhancer of rudimentary homolog OS=Mus musculus GN=Erh PE=1 SV=1
2740	3583	P84089|ERH_MOUSE	1.4	130.15	2130	1870	1	0.88	2130	1870	1	0.88	-	-	17	4	2	TMT6plex	12259	Enhancer of rudimentary homolog OS=Mus musculus GN=Erh PE=1 SV=1
1832	2686	tr|F6YVP7|F6YVP7_MOUSE	5.96	130.15	2350	1610	1	0.69	2350	1610	1	0.69	-	-	19	3	3	TMT6plex	17672	Uncharacterized protein OS=Mus musculus GN=Gm10260 PE=3 SV=2
1832	2687	P62270|RS18_MOUSE	5.96	130.15	2350	1610	1	0.69	2350	1610	1	0.69	-	-	19	3	3	TMT6plex	17719	40S ribosomal protein S18 OS=Mus musculus GN=Rps18 PE=1 SV=3
1508	3819	O35143|ATIF1_MOUSE	5.55	130.06	24100	22200	1	0.92	24100	22200	1	0.92	-	-	27	5	5	TMT6plex	12159	ATPase inhibitor mitochondrial OS=Mus musculus GN=Atpif1 PE=1 SV=2
2915	2880	Q8K1Z0|COQ9_MOUSE	1.54	130.02	1640	1740	1	1.06	1640	1740	1	1.06	-	-	7	2	2	TMT6plex	35083	Ubiquinone biosynthesis protein COQ9 mitochondrial OS=Mus musculus GN=Coq9 PE=1 SV=1
3099	2854	Q8BH58|TIPRL_MOUSE	3.98	130	2150	2490	1	1.15	2150	2490	1	1.15	-	-	14	3	3	TMT6plex	31254	TIP41-like protein OS=Mus musculus GN=Tiprl PE=1 SV=1
1311	1751	tr|G3UXW9|G3UXW9_MOUSE	2.58	129.96	785	619.657	1	0.79	785	619.657	1	0.79	-	-	4	5	2	TMT6plex	58861	COP9 signalosome complex subunit 1 OS=Mus musculus GN=Gps1 PE=1 SV=1
2575	3757	P48024|EIF1_MOUSE	2.32	129.93	308	272.219	1	0.88	308	272.219	1	0.88	-	-	12	2	1	Carbamidomethylation; TMT6plex	12747	Eukaryotic translation initiation factor 1 OS=Mus musculus GN=Eif1 PE=1 SV=2
2452	2871	Q80YA9|CNKR2_MOUSE	2.86	129.91	304	211.925	1	0.7	304	211.925	1	0.7	-	-	1	4	1	TMT6plex	117396	Connector enhancer of kinase suppressor of ras 2 OS=Mus musculus GN=Cnksr2 PE=1 SV=1
1267	2338	Q99LP6|GRPE1_MOUSE	4.16	129.91	5040	3990	1	0.79	5040	3990	1	0.79	-	-	30	7	6	TMT6plex	24307	GrpE protein homolog 1 mitochondrial OS=Mus musculus GN=Grpel1 PE=1 SV=1
2092	2428	P47791|GSHR_MOUSE	1.43	129.89	1630	1560	1	0.96	1630	1560	1	0.96	-	-	6	4	3	Carbamidomethylation; TMT6plex	53663	Glutathione reductase mitochondrial OS=Mus musculus GN=Gsr PE=1 SV=3
822	3586	P26883|FKB1A_MOUSE	4.17	129.82	8350	6930	1	0.83	8350	6930	1	0.83	-	-	27	4	2	Carbamidomethylation; TMT6plex	11923	Peptidyl-prolyl cis-trans isomerase FKBP1A OS=Mus musculus GN=Fkbp1a PE=1 SV=2
2266	3012	tr|B1AS06|B1AS06_MOUSE	9.56	129.81	1410	982.018	1	0.7	1410	982.018	1	0.7	-	-	4	6	3	TMT6plex	104672	Disks large-associated protein 3 OS=Mus musculus GN=Dlgap3 PE=1 SV=1
2266	3013	Q6PFD5|DLGP3_MOUSE	9.56	129.81	1410	982.018	1	0.7	1410	982.018	1	0.7	-	-	4	6	3	TMT6plex	105873	Disks large-associated protein 3 OS=Mus musculus GN=Dlgap3 PE=1 SV=1
3121	3802	Q8K2C9|HACD3_MOUSE	2.72	129.79	1700	1420	1	0.83	1700	1420	1	0.83	-	-	12	4	4	TMT6plex	43131	Very-long-chain (3R)-3-hydroxyacyl-CoA dehydratase 3 OS=Mus musculus GN=Hacd3 PE=1 SV=2
3336	3105	Q9CXY6|ILF2_MOUSE	1.48	129.73	3280	2910	1	0.89	3280	2910	1	0.89	-	-	8	2	2	TMT6plex; Deamidation (NQ)	43062	Interleukin enhancer-binding factor 2 OS=Mus musculus GN=Ilf2 PE=1 SV=1
2184	2449	tr|D3Z5I6|D3Z5I6_MOUSE	7.09	129.64	342	166.555	1	0.49	342	166.555	1	0.49	-	-	1	4	1	TMT6plex	128023	IQ motif and SEC7 domain-containing protein 2 OS=Mus musculus GN=Iqsec2 PE=1 SV=1
2184	2458	Q5DU25|IQEC2_MOUSE	7.09	129.64	342	166.555	1	0.49	342	166.555	1	0.49	-	-	1	4	1	TMT6plex	161786	IQ motif and SEC7 domain-containing protein 2 OS=Mus musculus GN=Iqsec2 PE=1 SV=3
2184	2459	tr|A4GZ26|A4GZ26_MOUSE	7.09	129.64	342	166.555	1	0.49	342	166.555	1	0.49	-	-	1	4	1	TMT6plex	161771	ARF6 guanine nucleotide exchange factor IQArfGEF OS=Mus musculus GN=Iqsec2 PE=1 SV=1
2184	2460	tr|E9QAD8|E9QAD8_MOUSE	7.09	129.64	342	166.555	1	0.49	342	166.555	1	0.49	-	-	1	4	1	TMT6plex	162833	IQ motif and SEC7 domain-containing protein 2 OS=Mus musculus GN=Iqsec2 PE=1 SV=1
2512	2916	O88998|NOE1_MOUSE	1.04	129.63	2440	2520	1	1.03	2440	2520	1	1.03	-	-	7	5	3	TMT6plex	55398	Noelin OS=Mus musculus GN=Olfm1 PE=1 SV=1
2512	2917	tr|Q8R357|Q8R357_MOUSE	1.04	129.63	2440	2520	1	1.03	2440	2520	1	1.03	-	-	7	5	3	TMT6plex	55428	Noelin OS=Mus musculus GN=Olfm1 PE=1 SV=1
2059	3022	A2ALU4|SHRM2_MOUSE	1.1	129.53	304	355.795	1	1.17	304	355.795	1	1.17	-	-	1	2	1	TMT6plex	164703	Protein Shroom2 OS=Mus musculus GN=Shroom2 PE=1 SV=1
2059	3023	tr|A7TU71|A7TU71_MOUSE	1.1	129.53	304	355.795	1	1.17	304	355.795	1	1.17	-	-	1	2	1	TMT6plex	165263	Protein Shroom2 OS=Mus musculus GN=Shroom2 PE=1 SV=1
1220	2041	Q91XL9|OSBL1_MOUSE	2.32	129.16	3670	3050	1	0.83	3670	3050	1	0.83	-	-	6	6	5	Carbamidomethylation; TMT6plex	107795	Oxysterol-binding protein-related protein 1 OS=Mus musculus GN=Osbpl1a PE=1 SV=2
1699	2816	P35282|RAB21_MOUSE	5.42	129.06	1540	1390	1	0.9	1540	1390	1	0.9	-	-	19	6	3	Carbamidomethylation; TMT6plex	24106	Ras-related protein Rab-21 OS=Mus musculus GN=Rab21 PE=1 SV=4
493	3433	Q91ZU6|DYST_MOUSE	3.18	128.84	816	551.005	1	0.68	816	551.005	1	0.68	-	-	0	17	1	TMT6plex	834234	Dystonin OS=Mus musculus GN=Dst PE=1 SV=2
493	3435	tr|E9Q9X1|E9Q9X1_MOUSE	3.18	128.84	816	551.005	1	0.68	816	551.005	1	0.68	-	-	0	17	1	TMT6plex	835707	Dystonin OS=Mus musculus GN=Dst PE=1 SV=2
493	3450	tr|S4R1P5|S4R1P5_MOUSE	3.18	128.84	816	551.005	1	0.68	816	551.005	1	0.68	-	-	0	17	1	TMT6plex	870551	Dystonin OS=Mus musculus GN=Dst PE=1 SV=1
2142	2356	Q9CWK8|SNX2_MOUSE	4.98	128.55	945	844.118	1	0.89	945	844.118	1	0.89	-	-	5	7	2	TMT6plex	58471	Sorting nexin-2 OS=Mus musculus GN=Snx2 PE=1 SV=2
1464	3467	Q9D898|ARP5L_MOUSE	3.81	128.24	3960	4430	1	1.12	3960	4430	1	1.12	-	-	24	3	3	TMT6plex	16980	Actin-related protein 2/3 complex subunit 5-like protein OS=Mus musculus GN=Arpc5l PE=1 SV=1
1645	2558	P97765|WBP2_MOUSE	5.95	128.22	9610	8310	1	0.86	9610	8310	1	0.86	-	-	14	4	4	TMT6plex	28032	WW domain-binding protein 2 OS=Mus musculus GN=Wbp2 PE=1 SV=1
3065	2581	Q91YR1|TWF1_MOUSE	3.05	128.18	1190	906.203	1	0.76	1190	906.203	1	0.76	-	-	5	3	2	TMT6plex	40079	Twinfilin-1 OS=Mus musculus GN=Twf1 PE=1 SV=2
1413	4168	P29595|NEDD8_MOUSE	2.87	128.06	7660	6240	1	0.81	7660	6240	1	0.81	-	-	25	3	3	TMT6plex	8972	NEDD8 OS=Mus musculus GN=Nedd8 PE=1 SV=2
1225	2329	P39688|FYN_MOUSE	1.91	128.06	355	317.589	1	0.89	355	317.589	1	0.89	-	-	1	7	1	TMT6plex	60675	Tyrosine-protein kinase Fyn OS=Mus musculus GN=Fyn PE=1 SV=4
2143	2884	Q9R1P3|PSB2_MOUSE	2.75	128.01	3620	4210	1	1.16	3620	4210	1	1.16	-	-	20	5	4	Carbamidomethylation; TMT6plex	22906	Proteasome subunit beta type-2 OS=Mus musculus GN=Psmb2 PE=1 SV=1
1356	7274	P20065|TYB4_MOUSE	3.42	127.96	38300	37500	1	0.98	38300	37500	1	0.98	-	-	38	6	5	TMT6plex; Deamidation (NQ)	5679	Thymosin beta-4 OS=Mus musculus GN=Tmsb4x PE=1 SV=1
1736	2520	P62301|RS13_MOUSE	4.36	127.83	4480	3380	1	0.75	4480	3380	1	0.75	-	-	33	6	5	TMT6plex	17222	40S ribosomal protein S13 OS=Mus musculus GN=Rps13 PE=1 SV=2
2287	1929	Q8R2R9|AP3M2_MOUSE	2.33	127.82	1380	1120	1	0.81	1380	1120	1	0.81	-	-	4	5	2	TMT6plex	46916	AP-3 complex subunit mu-2 OS=Mus musculus GN=Ap3m2 PE=1 SV=1
2421	4616	P43024|CX6A1_MOUSE	1.36	127.81	1190	1340	1	1.13	1190	1340	1	1.13	-	-	26	1	1	TMT6plex; Deamidation (NQ)	12352	Cytochrome c oxidase subunit 6A1 mitochondrial OS=Mus musculus GN=Cox6a1 PE=1 SV=2
2421	4617	tr|Q9DCW5|Q9DCW5_MOUSE	1.36	127.81	1190	1340	1	1.13	1190	1340	1	1.13	-	-	26	1	1	TMT6plex; Deamidation (NQ)	12483	Cytochrome c oxidase subunit 6A mitochondrial OS=Mus musculus GN=Cox6a1 PE=1 SV=1
1969	2625	P80560|PTPR2_MOUSE	1.04	127.77	664	585.629	1	0.88	664	585.629	1	0.88	-	-	1	4	1	TMT6plex	111497	Receptor-type tyrosine-protein phosphatase N2 OS=Mus musculus GN=Ptprn2 PE=1 SV=2
1950	2628	O55106|STRN_MOUSE	2.71	127.69	1520	1380	1	0.91	1520	1380	1	0.91	-	-	3	6	3	TMT6plex	85966	Striatin OS=Mus musculus GN=Strn PE=1 SV=2
1795	2977	Q9CPW4|ARPC5_MOUSE	2.25	127.66	5260	5400	1	1.03	5260	5400	1	1.03	-	-	31	6	5	TMT6plex; Deamidation (NQ)	16288	Actin-related protein 2/3 complex subunit 5 OS=Mus musculus GN=Arpc5 PE=1 SV=3
1796	3161	Q9Z1J3|NFS1_MOUSE	2.6	127.56	1850	2010	1	1.08	1850	2010	1	1.08	-	-	8	7	4	TMT6plex	50570	Cysteine desulfurase mitochondrial OS=Mus musculus GN=Nfs1 PE=1 SV=3
3144	3256	tr|Q8CBG6|Q8CBG6_MOUSE	3.25	127.47	228	244.161	1	1.07	228	244.161	1	1.07	-	-	7	1	1	TMT6plex	22663	6-phosphogluconolactonase OS=Mus musculus GN=Pgls PE=1 SV=1
3144	3257	Q9CQ60|6PGL_MOUSE	3.25	127.47	228	244.161	1	1.07	228	244.161	1	1.07	-	-	6	1	1	TMT6plex	27254	6-phosphogluconolactonase OS=Mus musculus GN=Pgls PE=1 SV=1
2867	2718	P49443|PPM1A_MOUSE	2.01	127.3	1230	1050	1	0.86	1230	1050	1	0.86	-	-	6	5	2	Carbamidomethylation; TMT6plex	42433	Protein phosphatase 1A OS=Mus musculus GN=Ppm1a PE=1 SV=1
1505	2912	Q71M36|CSPG5_MOUSE	5.9	127.27	6490	5300	1	0.82	6490	5300	1	0.82	-	-	8	8	4	TMT6plex	60406	Chondroitin sulfate proteoglycan 5 OS=Mus musculus GN=Cspg5 PE=1 SV=2
2029	3085	Q9CR57|RL14_MOUSE	7.51	127.24	2040	1650	1	0.81	2040	1650	1	0.81	-	-	16	5	3	Carbamidomethylation; TMT6plex	23564	60S ribosomal protein L14 OS=Mus musculus GN=Rpl14 PE=1 SV=3
2553	2674	Q80U63|MFN2_MOUSE	0.88	127.21	1020	1080	1	1.06	1020	1080	1	1.06	-	-	3	4	3	TMT6plex	86188	Mitofusin-2 OS=Mus musculus GN=Mfn2 PE=1 SV=3
1676	2397	Q4KUS2|UN13A_MOUSE	1.69	127.13	291	282.965	1	0.97	291	282.965	1	0.97	-	-	0	5	1	TMT6plex	193781	Protein unc-13 homolog A OS=Mus musculus GN=Unc13a PE=1 SV=3
1676	2401	tr|H3BJZ7|H3BJZ7_MOUSE	1.69	127.13	291	282.965	1	0.97	291	282.965	1	0.97	-	-	0	5	1	TMT6plex	195826	Protein unc-13 homolog A OS=Mus musculus GN=Unc13a PE=1 SV=1
2298	2496	tr|A2AEX6|A2AEX6_MOUSE	1	127.07	2630	2490	1	0.95	2630	2490	1	0.95	-	-	16	5	4	Carbamidomethylation; TMT6plex	35081	Four and a half LIM domains protein 1 OS=Mus musculus GN=Fhl1 PE=1 SV=1
2144	3321	Q9QUR7|PIN1_MOUSE	5.41	126.94	1610	1210	1	0.75	1610	1210	1	0.75	-	-	13	2	2	TMT6plex; Deamidation (NQ)	18370	Peptidyl-prolyl cis-trans isomerase NIMA-interacting 1 OS=Mus musculus GN=Pin1 PE=1 SV=1
1411	2540	Q8BG51|MIRO1_MOUSE	1.67	126.91	1760	1600	1	0.91	1760	1600	1	0.91	-	-	9	9	5	Carbamidomethylation; TMT6plex	72242	Mitochondrial Rho GTPase 1 OS=Mus musculus GN=Rhot1 PE=1 SV=1
2132	1844	Q3TEA8|HP1B3_MOUSE	6.45	126.88	1970	1490	1	0.76	1970	1490	1	0.76	-	-	5	4	3	TMT6plex	60867	Heterochromatin protein 1-binding protein 3 OS=Mus musculus GN=Hp1bp3 PE=1 SV=1
2132	1845	tr|Z4YKB8|Z4YKB8_MOUSE	6.45	126.88	1970	1490	1	0.76	1970	1490	1	0.76	-	-	5	4	3	TMT6plex	60851	Heterochromatin protein 1-binding protein 3 OS=Mus musculus GN=Hp1bp3 PE=1 SV=1
3064	2483	P16014|SCG1_MOUSE	5.36	126.8	1090	759.348	1	0.7	1090	759.348	1	0.7	-	-	6	3	3	Carbamidomethylation; TMT6plex	77969	Secretogranin-1 OS=Mus musculus GN=Chgb PE=1 SV=2
2509	2017	Q9Z1F9|SAE2_MOUSE	2.45	126.58	1790	1480	1	0.83	1790	1480	1	0.83	-	-	6	5	5	TMT6plex	70569	SUMO-activating enzyme subunit 2 OS=Mus musculus GN=Uba2 PE=1 SV=1
2454	2774	Q9JKY5|HIP1R_MOUSE	2.49	126.44	1210	1120	1	0.92	1210	1120	1	0.92	-	-	4	5	3	TMT6plex	119426	Huntingtin-interacting protein 1-related protein OS=Mus musculus GN=Hip1r PE=1 SV=2
2889	2604	tr|D3Z0F5|D3Z0F5_MOUSE	2.66	126.12	2030	1780	1	0.88	2030	1780	1	0.88	-	-	13	5	3	Carbamidomethylation; TMT6plex	33592	COP9 signalosome complex subunit 6 OS=Mus musculus GN=Cops6 PE=1 SV=1
2889	2621	O88545|CSN6_MOUSE	2.66	126.12	2030	1780	1	0.88	2030	1780	1	0.88	-	-	12	5	3	Carbamidomethylation; TMT6plex	35880	COP9 signalosome complex subunit 6 OS=Mus musculus GN=Cops6 PE=1 SV=1
1647	2765	tr|Q78ZM0|Q78ZM0_MOUSE	0.64	125.96	2910	2720	1	0.94	2910	2720	1	0.94	-	-	10	6	2	TMT6plex	18762	Putative uncharacterized protein OS=Mus musculus GN=Snx3 PE=1 SV=1
2325	3391	tr|D3Z6B9|D3Z6B9_MOUSE	3.74	125.92	190	287.143	1	1.51	190	287.143	1	1.51	-	-	1	5	1	TMT6plex	88898	Mitochondrial 10-formyltetrahydrofolate dehydrogenase OS=Mus musculus GN=Aldh1l2 PE=1 SV=1
2325	3398	Q8K009|AL1L2_MOUSE	3.74	125.92	190	287.143	1	1.51	190	287.143	1	1.51	-	-	1	5	1	TMT6plex	101590	Mitochondrial 10-formyltetrahydrofolate dehydrogenase OS=Mus musculus GN=Aldh1l2 PE=1 SV=2
2705	2299	Q9R0X4|ACOT9_MOUSE	1.94	125.88	355	334.304	1	0.94	355	334.304	1	0.94	-	-	2	1	1	TMT6plex	50561	Acyl-coenzyme A thioesterase 9 mitochondrial OS=Mus musculus GN=Acot9 PE=1 SV=1
2395	3007	Q9WU28|PFD5_MOUSE	0.98	125.83	3200	3120	1	0.97	3200	3120	1	0.97	-	-	27	3	3	Carbamidomethylation; TMT6plex	17356	Prefoldin subunit 5 OS=Mus musculus GN=Pfdn5 PE=1 SV=1
1273	2003	Q922H2|PDK3_MOUSE	3.41	125.82	1580	1300	1	0.82	1580	1300	1	0.82	-	-	11	7	4	Carbamidomethylation; TMT6plex	47923	[Pyruvate dehydrogenase (acetyl-transferring)] kinase isozyme 3 mitochondrial OS=Mus musculus GN=Pdk3 PE=1 SV=1
2455	2895	Q9WTM5|RUVB2_MOUSE	0.83	125.81	757	734.275	1	0.97	757	734.275	1	0.97	-	-	5	3	2	Carbamidomethylation; TMT6plex; Deamidation (NQ)	51113	RuvB-like 2 OS=Mus musculus GN=Ruvbl2 PE=1 SV=3
2916	3144	O88851|RBBP9_MOUSE	0.98	125.58	1450	1580	1	1.09	1450	1580	1	1.09	-	-	23	3	3	TMT6plex; Deamidation (NQ)	20912	Putative hydrolase RBBP9 OS=Mus musculus GN=Rbbp9 PE=1 SV=2
2249	3748	P62267|RS23_MOUSE	8.13	125.56	3160	2190	1	0.69	3160	2190	1	0.69	-	-	17	4	3	TMT6plex	15808	40S ribosomal protein S23 OS=Mus musculus GN=Rps23 PE=1 SV=3
1999	2634	Q9CZX8|RS19_MOUSE	4.91	125.49	5300	5010	1	0.95	5300	5010	1	0.95	-	-	26	5	5	TMT6plex	16085	40S ribosomal protein S19 OS=Mus musculus GN=Rps19 PE=1 SV=3
1999	2647	tr|D3YUG3|D3YUG3_MOUSE	4.91	125.49	5300	5010	1	0.95	5300	5010	1	0.95	-	-	27	5	5	TMT6plex	15363	40S ribosomal protein S19 (Fragment) OS=Mus musculus GN=Rps19 PE=1 SV=8
1999	2723	tr|D3YUT3|D3YUT3_MOUSE	4.91	125.49	5300	5010	1	0.95	5300	5010	1	0.95	-	-	28	5	5	TMT6plex	14896	40S ribosomal protein S19 (Fragment) OS=Mus musculus GN=Rps19 PE=1 SV=2
1999	2726	tr|D3Z5R8|D3Z5R8_MOUSE	4.91	125.49	5300	5010	1	0.95	5300	5010	1	0.95	-	-	21	5	5	TMT6plex	19374	40S ribosomal protein S19 (Fragment) OS=Mus musculus GN=Rps19 PE=1 SV=8
1999	2727	tr|D3Z722|D3Z722_MOUSE	4.91	125.49	5300	5010	1	0.95	5300	5010	1	0.95	-	-	17	5	5	TMT6plex	23104	40S ribosomal protein S19 OS=Mus musculus GN=Rps19 PE=1 SV=1
1529	2069	Q9JL62|GLTP_MOUSE	2.68	125.44	5430	6380	1	1.18	5430	6380	1	1.18	-	-	21	5	5	TMT6plex	23690	Glycolipid transfer protein OS=Mus musculus GN=Gltp PE=1 SV=3
1824	3385	Q80Y14|GLRX5_MOUSE	1.79	125.37	464	371.316	1	0.8	464	371.316	1	0.8	-	-	10	3	1	TMT6plex	16292	Glutaredoxin-related protein 5 mitochondrial OS=Mus musculus GN=Glrx5 PE=1 SV=2
1036	2143	tr|D3YZU5|D3YZU5_MOUSE	1.28	125.31	912	818.448	1	0.9	912	818.448	1	0.9	-	-	1	6	3	Carbamidomethylation; TMT6plex	225457	SH3 and multiple ankyrin repeat domains protein 1 OS=Mus musculus GN=Shank1 PE=1 SV=1
1036	2144	tr|D3YZU4|D3YZU4_MOUSE	1.28	125.31	912	818.448	1	0.9	912	818.448	1	0.9	-	-	1	6	3	Carbamidomethylation; TMT6plex	225347	SH3 and multiple ankyrin repeat domains protein 1 OS=Mus musculus GN=Shank1 PE=1 SV=1
1036	2145	D3YZU1|SHAN1_MOUSE	1.28	125.31	912	818.448	1	0.9	912	818.448	1	0.9	-	-	1	6	3	Carbamidomethylation; TMT6plex	226315	SH3 and multiple ankyrin repeat domains protein 1 OS=Mus musculus GN=Shank1 PE=1 SV=1
1536	2234	P62242|RS8_MOUSE	6.05	125.19	8260	5620	1	0.68	8260	5620	1	0.68	-	-	34	8	7	Carbamidomethylation; TMT6plex	24205	40S ribosomal protein S8 OS=Mus musculus GN=Rps8 PE=1 SV=2
1657	2269	tr|Q8JZZ5|Q8JZZ5_MOUSE	2.31	124.76	1390	1200	1	0.87	1390	1200	1	0.87	-	-	11	6	3	TMT6plex	31616	Phosphatidylinositol transfer protein beta isoform OS=Mus musculus GN=Pitpnb PE=1 SV=1
1657	2293	P53811|PIPNB_MOUSE	2.31	124.76	1390	1200	1	0.87	1390	1200	1	0.87	-	-	11	6	3	TMT6plex	31487	Phosphatidylinositol transfer protein beta isoform OS=Mus musculus GN=Pitpnb PE=1 SV=2
1177	3276	P62484|ABI2_MOUSE	2.89	124.71	544	443.55	1	0.82	544	443.55	1	0.82	-	-	2	5	1	TMT6plex	49387	Abl interactor 2 OS=Mus musculus GN=Abi2 PE=1 SV=1
1177	3277	tr|A0A087WPP8|A0A087WPP8_MOUSE	2.89	124.71	544	443.55	1	0.82	544	443.55	1	0.82	-	-	2	5	1	TMT6plex	52483	Abl interactor 2 OS=Mus musculus GN=Abi2 PE=1 SV=1
1177	3278	tr|Q6AXH6|Q6AXH6_MOUSE	2.89	124.71	544	443.55	1	0.82	544	443.55	1	0.82	-	-	2	5	1	TMT6plex	52840	Abi2 protein OS=Mus musculus GN=Abi2 PE=1 SV=1
1177	3279	tr|Q6AXD2|Q6AXD2_MOUSE	2.89	124.71	544	443.55	1	0.82	544	443.55	1	0.82	-	-	2	5	1	TMT6plex	52900	Abi2 protein OS=Mus musculus GN=Abi2 PE=1 SV=1
2759	2570	Q9DB60|PGFS_MOUSE	0.96	124.21	3400	3150	1	0.93	3400	3150	1	0.93	-	-	10	3	3	Carbamidomethylation; TMT6plex	21670	Prostamide/prostaglandin F synthase OS=Mus musculus GN=Fam213b PE=1 SV=1
1154	3164	tr|D3YYN8|D3YYN8_MOUSE	1.52	123.81	304	282.368	1	0.93	304	282.368	1	0.93	-	-	1	7	1	TMT6plex	192678	Serine/threonine-protein kinase MRCK alpha OS=Mus musculus GN=Cdc42bpa PE=1 SV=1
1154	3165	Q3UU96|MRCKA_MOUSE	1.52	123.81	304	282.368	1	0.93	304	282.368	1	0.93	-	-	1	7	1	TMT6plex	195535	Serine/threonine-protein kinase MRCK alpha OS=Mus musculus GN=Cdc42bpa PE=1 SV=2
1154	3166	tr|E9PVY0|E9PVY0_MOUSE	1.52	123.81	304	282.368	1	0.93	304	282.368	1	0.93	-	-	1	7	1	TMT6plex	196919	Serine/threonine-protein kinase MRCK alpha OS=Mus musculus GN=Cdc42bpa PE=1 SV=1
1154	3167	tr|A0A1D5RLQ9|A0A1D5RLQ9_MOUSE	1.52	123.81	304	282.368	1	0.93	304	282.368	1	0.93	-	-	1	7	1	TMT6plex	198589	Serine/threonine-protein kinase MRCK alpha OS=Mus musculus GN=Cdc42bpa PE=1 SV=1
2001	3049	Q9JHW2|NIT2_MOUSE	2.18	123.8	380	300.277	1	0.79	380	300.277	1	0.79	-	-	3	4	1	TMT6plex	30502	Omega-amidase NIT2 OS=Mus musculus GN=Nit2 PE=1 SV=1
1616	3000	tr|H3BIW6|H3BIW6_MOUSE	1.87	123.67	380	489.517	1	1.29	380	489.517	1	1.29	-	-	1	5	1	TMT6plex; Deamidation (NQ)	125778	Phosphoinositide phospholipase C OS=Mus musculus GN=Plch2 PE=1 SV=1
1616	3006	tr|F7C3A0|F7C3A0_MOUSE	1.87	123.67	380	489.517	1	1.29	380	489.517	1	1.29	-	-	1	5	1	TMT6plex; Deamidation (NQ)	136293	Phosphoinositide phospholipase C OS=Mus musculus GN=Plch2 PE=1 SV=2
1923	3599	Q9CR61|NDUB7_MOUSE	4.01	123.66	3110	3410	1	1.1	3110	3410	1	1.1	-	-	26	4	4	Carbamidomethylation; TMT6plex	16331	NADH dehydrogenase [ubiquinone] 1 beta subcomplex subunit 7 OS=Mus musculus GN=Ndufb7 PE=1 SV=3
2388	2482	tr|Q3KQM4|Q3KQM4_MOUSE	2.88	123.45	3380	2730	1	0.81	3380	2730	1	0.81	-	-	20	6	5	TMT6plex	33902	Splicing factor U2AF 65 kDa subunit OS=Mus musculus GN=U2af2 PE=1 SV=1
2388	2506	tr|Q80XR5|Q80XR5_MOUSE	2.88	123.45	3380	2730	1	0.81	3380	2730	1	0.81	-	-	13	6	5	TMT6plex	53121	Splicing factor U2AF 65 kDa subunit OS=Mus musculus GN=U2af2 PE=1 SV=1
2388	2507	P26369|U2AF2_MOUSE	2.88	123.45	3380	2730	1	0.81	3380	2730	1	0.81	-	-	13	6	5	TMT6plex	53517	Splicing factor U2AF 65 kDa subunit OS=Mus musculus GN=U2af2 PE=1 SV=3
2205	3200	tr|F6VQH5|F6VQH5_MOUSE	2.22	123.41	443	330.722	1	0.75	443	330.722	1	0.75	-	-	2	4	1	TMT6plex	35654	Heterogeneous nuclear ribonucleoprotein D-like (Fragment) OS=Mus musculus GN=Hnrnpdl PE=1 SV=1
2205	3203	Q9Z130|HNRDL_MOUSE	2.22	123.41	443	330.722	1	0.75	443	330.722	1	0.75	-	-	3	4	1	TMT6plex	33559	Heterogeneous nuclear ribonucleoprotein D-like OS=Mus musculus GN=Hnrnpdl PE=1 SV=1
2205	3207	tr|D3YTQ3|D3YTQ3_MOUSE	2.22	123.41	443	330.722	1	0.75	443	330.722	1	0.75	-	-	2	4	1	TMT6plex	46270	Heterogeneous nuclear ribonucleoprotein D-like OS=Mus musculus GN=Hnrnpdl PE=1 SV=1
2521	2508	tr|A0A0B4J1E7|A0A0B4J1E7_MOUSE	2.4	123.39	355	260.28	1	0.73	355	260.28	1	0.73	-	-	2	2	1	TMT6plex	68031	Importin subunit alpha-3 OS=Mus musculus GN=Kpna4 PE=1 SV=1
2521	2510	O35343|IMA3_MOUSE	2.4	123.39	355	260.28	1	0.73	355	260.28	1	0.73	-	-	3	2	1	TMT6plex	57923	Importin subunit alpha-3 OS=Mus musculus GN=Kpna4 PE=1 SV=1
1634	2989	Q6KAR6|EXOC3_MOUSE	3.15	123.24	317	290.725	1	0.92	317	290.725	1	0.92	-	-	1	3	1	TMT6plex	86455	Exocyst complex component 3 OS=Mus musculus GN=Exoc3 PE=1 SV=2
2262	3770	tr|D3Z0L4|D3Z0L4_MOUSE	1.58	123.12	253	304.456	1	1.2	253	304.456	1	1.2	-	-	4	5	1	TMT6plex	22452	MICOS complex subunit (Fragment) OS=Mus musculus GN=Chchd3 PE=1 SV=1
2355	1922	Q5U3K5|RABL6_MOUSE	3.1	122.91	1410	1350	1	0.96	1410	1350	1	0.96	-	-	3	2	2	Carbamidomethylation; TMT6plex	79831	Rab-like protein 6 OS=Mus musculus GN=Rabl6 PE=1 SV=2
4167	3733	Q9D6S7|RRFM_MOUSE	2.55	122.36	317	228.043	1	0.72	317	228.043	1	0.72	-	-	5	1	1	TMT6plex	29051	Ribosome-recycling factor mitochondrial OS=Mus musculus GN=Mrrf PE=1 SV=1
3115	3119	Q9DBS2|TPRGL_MOUSE	1.82	122.32	266	340.274	1	1.28	266	340.274	1	1.28	-	-	5	4	1	Carbamidomethylation; TMT6plex	29814	Tumor protein p63-regulated gene 1-like protein OS=Mus musculus GN=Tprg1l PE=1 SV=1
2661	2980	Q6ZWX6|IF2A_MOUSE	1.98	122.21	817	888.294	1	1.09	817	888.294	1	1.09	-	-	5	2	2	TMT6plex	36108	Eukaryotic translation initiation factor 2 subunit 1 OS=Mus musculus GN=Eif2s1 PE=1 SV=3
2138	3436	Q9CQ54|NDUC2_MOUSE	2.33	122.19	8760	9070	1	1.04	8760	9070	1	1.04	-	-	32	4	4	TMT6plex	14164	NADH dehydrogenase [ubiquinone] 1 subunit C2 OS=Mus musculus GN=Ndufc2 PE=1 SV=1
3359	3662	P70202|LXN_MOUSE	2.18	122.08	3270	2970	1	0.91	3270	2970	1	0.91	-	-	9	2	2	TMT6plex	25492	Latexin OS=Mus musculus GN=Lxn PE=1 SV=2
2555	3736	Q9DAK9|PHP14_MOUSE	1.59	121.96	2720	2530	1	0.93	2720	2530	1	0.93	-	-	21	4	3	Carbamidomethylation; TMT6plex	13997	14 kDa phosphohistidine phosphatase OS=Mus musculus GN=Phpt1 PE=1 SV=1
2350	3250	tr|Q8BH40|Q8BH40_MOUSE	0.97	121.74	1700	1700	1	1	1700	1700	1	1	-	-	10	2	2	TMT6plex	29737	Putative uncharacterized protein OS=Mus musculus GN=Stx7 PE=1 SV=1
2350	3251	O70439|STX7_MOUSE	0.97	121.74	1700	1700	1	1	1700	1700	1	1	-	-	10	2	2	TMT6plex	29821	Syntaxin-7 OS=Mus musculus GN=Stx7 PE=1 SV=3
2761	4079	O55100|SNG1_MOUSE	4.11	121.7	3640	2860	1	0.79	3640	2860	1	0.79	-	-	15	4	4	TMT6plex; Oxidation (M); Acetylation (Protein N-term)	25653	Synaptogyrin-1 OS=Mus musculus GN=Syngr1 PE=1 SV=2
1719	4653	Q91VW3|SH3L3_MOUSE	2.5	121.4	3400	3080	1	0.91	3400	3080	1	0.91	-	-	31	3	2	TMT6plex	10477	SH3 domain-binding glutamic acid-rich-like protein 3 OS=Mus musculus GN=Sh3bgrl3 PE=1 SV=1
1479	2557	tr|E9Q616|E9Q616_MOUSE	2.65	121.34	2550	2190	1	0.86	2550	2190	1	0.86	-	-	1	9	4	TMT6plex	604264	AHNAK nucleoprotein (desmoyokin) OS=Mus musculus GN=Ahnak PE=1 SV=1
3103	3372	tr|J3QP56|J3QP56_MOUSE	2.74	121.22	228	297.889	1	1.31	228	297.889	1	1.31	-	-	5	1	1	TMT6plex	23726	Acyl-protein thioesterase 1 OS=Mus musculus GN=Lypla1 PE=1 SV=1
3103	3373	P97823|LYPA1_MOUSE	2.74	121.22	228	297.889	1	1.31	228	297.889	1	1.31	-	-	5	1	1	TMT6plex	24688	Acyl-protein thioesterase 1 OS=Mus musculus GN=Lypla1 PE=1 SV=1
2554	3031	P97384|ANX11_MOUSE	3.63	121.19	1000	962.915	1	0.96	1000	962.915	1	0.96	-	-	6	4	3	Carbamidomethylation; TMT6plex	54079	Annexin A11 OS=Mus musculus GN=Anxa11 PE=1 SV=2
2242	2149	P54923|ADPRH_MOUSE	3.08	121.15	1110	1010	1	0.91	1110	1010	1	0.91	-	-	8	3	3	Carbamidomethylation; TMT6plex	40068	[Protein ADP-ribosylarginine] hydrolase OS=Mus musculus GN=Adprh PE=1 SV=1
2468	2531	Q9R1R2|TRIM3_MOUSE	0.17	121	709	698.457	1	0.99	709	698.457	1	0.99	-	-	3	3	2	TMT6plex	80775	Tripartite motif-containing protein 3 OS=Mus musculus GN=Trim3 PE=1 SV=1
2085	3293	tr|Q8BKP1|Q8BKP1_MOUSE	2.64	120.91	2190	1990	1	0.91	2190	1990	1	0.91	-	-	15	3	3	TMT6plex; Deamidation (NQ)	21706	Putative uncharacterized protein OS=Mus musculus GN=Tpd52l2 PE=1 SV=1
2085	3294	tr|F6VQ81|F6VQ81_MOUSE	2.64	120.91	2190	1990	1	0.91	2190	1990	1	0.91	-	-	19	3	3	TMT6plex; Deamidation (NQ)	17738	Tumor protein D54 (Fragment) OS=Mus musculus GN=Tpd52l2 PE=1 SV=1
2085	3296	tr|Q3TUJ9|Q3TUJ9_MOUSE	2.64	120.91	2190	1990	1	0.91	2190	1990	1	0.91	-	-	16	3	3	TMT6plex; Deamidation (NQ)	20130	Putative uncharacterized protein OS=Mus musculus GN=Tpd52l2 PE=1 SV=1
2085	3307	Q9CYZ2|TPD54_MOUSE	2.64	120.91	2190	1990	1	0.91	2190	1990	1	0.91	-	-	14	3	3	TMT6plex; Deamidation (NQ)	24043	Tumor protein D54 OS=Mus musculus GN=Tpd52l2 PE=1 SV=1
2085	3308	tr|A2AUD5|A2AUD5_MOUSE	2.64	120.91	2190	1990	1	0.91	2190	1990	1	0.91	-	-	13	3	3	TMT6plex; Deamidation (NQ)	25067	Tumor protein D54 OS=Mus musculus GN=Tpd52l2 PE=1 SV=1
2085	3310	tr|Q3TAI4|Q3TAI4_MOUSE	2.64	120.91	2190	1990	1	0.91	2190	1990	1	0.91	-	-	15	3	3	TMT6plex; Deamidation (NQ)	22466	Putative uncharacterized protein OS=Mus musculus GN=Tpd52l2 PE=1 SV=1
2085	3324	tr|V9GWU5|V9GWU5_MOUSE	2.64	120.91	2190	1990	1	0.91	2190	1990	1	0.91	-	-	18	3	3	TMT6plex; Deamidation (NQ)	18627	Tumor protein D54 (Fragment) OS=Mus musculus GN=Tpd52l2 PE=1 SV=8
2719	3236	P12815|PDCD6_MOUSE	0.76	120.87	1000	1050	1	1.05	1000	1050	1	1.05	-	-	9	3	2	TMT6plex	21867	Programmed cell death protein 6 OS=Mus musculus GN=Pdcd6 PE=1 SV=2
1917	2721	O08795|GLU2B_MOUSE	3.35	120.76	4280	3340	1	0.78	4280	3340	1	0.78	-	-	9	6	6	TMT6plex	58793	Glucosidase 2 subunit beta OS=Mus musculus GN=Prkcsh PE=1 SV=1
1951	3363	tr|Q5RKN9|Q5RKN9_MOUSE	2.93	120.73	1610	1260	1	0.79	1610	1260	1	0.79	-	-	7	5	2	TMT6plex	32954	Capping protein (Actin filament) muscle Z-line alpha 1 OS=Mus musculus GN=Capza1 PE=1 SV=1
1951	3366	P47753|CAZA1_MOUSE	2.93	120.73	1610	1260	1	0.79	1610	1260	1	0.79	-	-	7	5	2	TMT6plex	32940	F-actin-capping protein subunit alpha-1 OS=Mus musculus GN=Capza1 PE=1 SV=4
1744	2511	P62869|ELOB_MOUSE	2.56	120.73	3580	3300	1	0.92	3580	3300	1	0.92	-	-	23	4	3	TMT6plex	13170	Elongin-B OS=Mus musculus GN=Elob PE=1 SV=1
3335	2898	Q07417|ACADS_MOUSE	2.81	120.62	766	903.815	1	1.18	766	903.815	1	1.18	-	-	2	1	1	TMT6plex	44890	Short-chain specific acyl-CoA dehydrogenase mitochondrial OS=Mus musculus GN=Acads PE=1 SV=2
3553	3513	Q8VE47|UBA5_MOUSE	1.45	120.21	449	366.541	1	0.82	449	366.541	1	0.82	-	-	2	1	1	TMT6plex	44790	Ubiquitin-like modifier-activating enzyme 5 OS=Mus musculus GN=Uba5 PE=1 SV=2
1829	3248	Q9D2P8|MOBP_MOUSE	12.42	120.08	2780	3490	1	1.25	2780	3490	1	1.25	-	-	15	3	2	Carbamidomethylation; TMT6plex	19197	Myelin-associated oligodendrocyte basic protein OS=Mus musculus GN=Mobp PE=1 SV=1
1270	4011	Q9JKD3|SCAM5_MOUSE	2.23	119.98	12000	10500	1	0.87	12000	10500	1	0.87	-	-	9	3	2	TMT6plex; Deamidation (NQ)	26068	Secretory carrier-associated membrane protein 5 OS=Mus musculus GN=Scamp5 PE=1 SV=1
3089	3495	P21460|CYTC_MOUSE	0.68	119.9	1450	1480	1	1.02	1450	1480	1	1.02	-	-	20	2	2	TMT6plex	15531	Cystatin-C OS=Mus musculus GN=Cst3 PE=1 SV=2
1739	2434	Q11136|PEPD_MOUSE	2.35	119.7	1090	995.749	1	0.91	1090	995.749	1	0.91	-	-	5	5	3	TMT6plex	55029	Xaa-Pro dipeptidase OS=Mus musculus GN=Pepd PE=1 SV=3
1538	3787	Q60771|CLD11_MOUSE	19.1	119.61	10300	15000	1	1.46	10300	15000	1	1.46	-	-	10	2	2	TMT6plex	22114	Claudin-11 OS=Mus musculus GN=Cldn11 PE=1 SV=1
2097	3292	Q03157|APLP1_MOUSE	2.99	119.53	380	261.474	1	0.69	380	261.474	1	0.69	-	-	1	2	1	TMT6plex	72751	Amyloid-like protein 1 OS=Mus musculus GN=Aplp1 PE=1 SV=1
1651	2364	tr|Q80YP4|Q80YP4_MOUSE	4.29	119.46	1770	1630	1	0.92	1770	1630	1	0.92	-	-	8	7	5	TMT6plex	68995	Guanylate cyclase soluble subunit beta-1 OS=Mus musculus GN=Gucy1b3 PE=1 SV=1
1651	2365	O54865|GCYB1_MOUSE	4.29	119.46	1770	1630	1	0.92	1770	1630	1	0.92	-	-	8	7	5	TMT6plex	70598	Guanylate cyclase soluble subunit beta-1 OS=Mus musculus GN=Gucy1b3 PE=1 SV=1
3882	4077	Q9CQZ1|HSBP1_MOUSE	0.85	119.26	355	333.11	1	0.94	355	333.11	1	0.94	-	-	14	1	1	TMT6plex	8611	Heat shock factor-binding protein 1 OS=Mus musculus GN=Hsbp1 PE=1 SV=1
1588	2126	tr|A2BI12|A2BI12_MOUSE	3.72	119.2	4580	4230	1	0.92	4580	4230	1	0.92	-	-	15	4	4	TMT6plex	36968	PC4 and SFRS1-interacting protein OS=Mus musculus GN=Psip1 PE=1 SV=1
1588	2150	Q99JF8|PSIP1_MOUSE	3.72	119.2	4580	4230	1	0.92	4580	4230	1	0.92	-	-	9	4	4	TMT6plex	59697	PC4 and SFRS1-interacting protein OS=Mus musculus GN=Psip1 PE=1 SV=1
1836	3699	tr|A0A0R4J1D0|A0A0R4J1D0_MOUSE	2.11	119.02	215	231.028	1	1.07	215	231.028	1	1.07	-	-	3	4	1	TMT6plex	60908	Copine-2 OS=Mus musculus GN=Cpne2 PE=1 SV=1
2134	2333	tr|D3Z494|D3Z494_MOUSE	2.69	118.78	950	1120	1	1.18	950	1120	1	1.18	-	-	8	5	2	Carbamidomethylation; TMT6plex	32746	Aldo-keto reductase family 1 member B10 (aldose reductase) OS=Mus musculus GN=Akr1b10 PE=1 SV=1
2134	2334	tr|G5E895|G5E895_MOUSE	2.69	118.78	950	1120	1	1.18	950	1120	1	1.18	-	-	7	5	2	Carbamidomethylation; TMT6plex	35848	Aldo-keto reductase family 1 member B10 (aldose reductase) OS=Mus musculus GN=Akr1b10 PE=1 SV=1
1726	3380	Q8BR92|PALM2_MOUSE	3.2	118.66	1150	1080	1	0.94	1150	1080	1	0.94	-	-	5	4	2	TMT6plex	42095	Paralemmin-2 OS=Mus musculus GN=Palm2 PE=1 SV=1
2341	2432	F8VPU2|FARP1_MOUSE	2.19	118.66	367	306.843	1	0.84	367	306.843	1	0.84	-	-	1	2	1	TMT6plex	118875	FERM RhoGEF and pleckstrin domain-containing protein 1 OS=Mus musculus GN=Farp1 PE=1 SV=1
1908	3068	O35593|PSDE_MOUSE	2.38	118.61	1700	2030	1	1.19	1700	2030	1	1.19	-	-	18	5	4	TMT6plex	34577	26S proteasome non-ATPase regulatory subunit 14 OS=Mus musculus GN=Psmd14 PE=1 SV=2
2707	3079	P62918|RL8_MOUSE	10.35	118.45	3560	2320	1	0.65	3560	2320	1	0.65	-	-	19	5	5	TMT6plex	28025	60S ribosomal protein L8 OS=Mus musculus GN=Rpl8 PE=1 SV=2
3527	3367	P08414|KCC4_MOUSE	1.37	118.4	1640	1550	1	0.95	1640	1550	1	0.95	-	-	8	4	4	TMT6plex	52628	Calcium/calmodulin-dependent protein kinase type IV OS=Mus musculus GN=Camk4 PE=1 SV=2
3527	3368	tr|Q8BGR3|Q8BGR3_MOUSE	1.37	118.4	1640	1550	1	0.95	1640	1550	1	0.95	-	-	8	4	4	TMT6plex	52543	Calcium/calmodulin-dependent protein kinase IV OS=Mus musculus GN=Camk4 PE=1 SV=1
2869	3473	Q99KP3|CRYL1_MOUSE	2.43	118.38	975	893.667	1	0.92	975	893.667	1	0.92	-	-	11	6	3	Carbamidomethylation; TMT6plex	35209	Lambda-crystallin homolog OS=Mus musculus GN=Cryl1 PE=1 SV=3
4073	3734	P47199|QOR_MOUSE	3.61	118.38	610	439.371	1	0.72	610	439.371	1	0.72	-	-	5	1	1	TMT6plex	35269	Quinone oxidoreductase OS=Mus musculus GN=Cryz PE=1 SV=1
4073	3753	tr|A0A0A6YXR4|A0A0A6YXR4_MOUSE	3.61	118.38	610	439.371	1	0.72	610	439.371	1	0.72	-	-	5	1	1	TMT6plex	32079	Quinone oxidoreductase (Fragment) OS=Mus musculus GN=Cryz PE=1 SV=5
2026	2717	Q9Z0Y1|DCTN3_MOUSE	1.36	118.35	3040	2960	1	0.97	3040	2960	1	0.97	-	-	23	6	5	TMT6plex	20978	Dynactin subunit 3 OS=Mus musculus GN=Dctn3 PE=1 SV=2
2108	3999	tr|D3YTU0|D3YTU0_MOUSE	1.51	118.32	2380	2080	1	0.87	2380	2080	1	0.87	-	-	19	3	2	TMT6plex	18735	Vesicle-associated membrane protein 1 OS=Mus musculus GN=Vamp1 PE=1 SV=1
2108	4066	tr|A0A0N4SUV3|A0A0N4SUV3_MOUSE	1.51	118.32	2380	2080	1	0.87	2380	2080	1	0.87	-	-	28	3	2	TMT6plex	12547	Vesicle-associated membrane protein 1 (Fragment) OS=Mus musculus GN=Vamp1 PE=1 SV=1
2108	4067	Q62442|VAMP1_MOUSE	1.51	118.32	2380	2080	1	0.87	2380	2080	1	0.87	-	-	28	3	2	TMT6plex	12890	Vesicle-associated membrane protein 1 OS=Mus musculus GN=Vamp1 PE=1 SV=1
2258	2413	P46061|RAGP1_MOUSE	0.98	118.23	241	226.849	1	0.94	241	226.849	1	0.94	-	-	2	3	1	TMT6plex	63531	Ran GTPase-activating protein 1 OS=Mus musculus GN=Rangap1 PE=1 SV=2
1226	2374	tr|Q3V2H3|Q3V2H3_MOUSE	1.98	118.1	1630	1680	1	1.03	1630	1680	1	1.03	-	-	10	6	2	TMT6plex	19808	Putative uncharacterized protein OS=Mus musculus GN=Snx12 PE=1 SV=1
2243	2572	Q8C0T5|SI1L1_MOUSE	2.86	118.07	936	854.863	1	0.91	936	854.863	1	0.91	-	-	1	3	2	TMT6plex	197030	Signal-induced proliferation-associated 1-like protein 1 OS=Mus musculus GN=Sipa1l1 PE=1 SV=2
1591	4259	P03911|NU4M_MOUSE	5.95	118.06	536	284.755	1	0.53	536	284.755	1	0.53	-	-	2	3	1	TMT6plex	51882	NADH-ubiquinone oxidoreductase chain 4 OS=Mus musculus GN=Mtnd4 PE=1 SV=1
2025	2046	tr|Q3TGU7|Q3TGU7_MOUSE	1.57	117.98	2070	1810	1	0.87	2070	1810	1	0.87	-	-	9	5	4	TMT6plex	43699	Proliferation-associated 2G4 OS=Mus musculus GN=Pa2g4 PE=1 SV=1
2025	2047	P50580|PA2G4_MOUSE	1.57	117.98	2070	1810	1	0.87	2070	1810	1	0.87	-	-	9	5	4	TMT6plex	43699	Proliferation-associated protein 2G4 OS=Mus musculus GN=Pa2g4 PE=1 SV=3
3147	3705	O35127|C10_MOUSE	1.98	117.93	727	919.336	1	1.26	727	919.336	1	1.26	-	-	12	1	1	TMT6plex	13194	Protein C10 OS=Mus musculus GN=Grcc10 PE=1 SV=1
2282	3624	tr|E9Q827|E9Q827_MOUSE	1.83	117.88	371	395.195	1	1.07	371	395.195	1	1.07	-	-	10	3	1	TMT6plex	16086	cAMP-regulated phosphoprotein 19 OS=Mus musculus GN=Arpp19 PE=1 SV=1
2282	3644	P56212|ARP19_MOUSE	1.83	117.88	371	395.195	1	1.07	371	395.195	1	1.07	-	-	13	3	1	TMT6plex	12293	cAMP-regulated phosphoprotein 19 OS=Mus musculus GN=Arpp19 PE=1 SV=2
1381	2425	O35857|TIM44_MOUSE	3.8	117.87	5270	4460	1	0.85	5270	4460	1	0.85	-	-	6	7	3	TMT6plex; Deamidation (NQ)	51091	Mitochondrial import inner membrane translocase subunit TIM44 OS=Mus musculus GN=Timm44 PE=1 SV=2
2583	3878	P08030|APT_MOUSE	1.47	117.6	266	327.14	1	1.23	266	327.14	1	1.23	-	-	7	2	1	TMT6plex	19724	Adenine phosphoribosyltransferase OS=Mus musculus GN=Aprt PE=1 SV=2
2510	2497	P51660|DHB4_MOUSE	0.63	117.57	637	682.936	1	1.07	637	682.936	1	1.07	-	-	3	2	2	TMT6plex	79482	Peroxisomal multifunctional enzyme type 2 OS=Mus musculus GN=Hsd17b4 PE=1 SV=3
2751	3401	P51880|FABP7_MOUSE	9.59	117.51	3660	2080	1	0.57	3660	2080	1	0.57	-	-	23	2	2	TMT6plex	14893	Fatty acid-binding protein brain OS=Mus musculus GN=Fabp7 PE=1 SV=2
2751	3444	tr|E9Q0H6|E9Q0H6_MOUSE	9.59	117.51	3660	2080	1	0.57	3660	2080	1	0.57	-	-	16	2	2	TMT6plex	20616	Fatty acid-binding protein brain OS=Mus musculus GN=Fabp7 PE=1 SV=1
1637	2382	tr|A2AKD7|A2AKD7_MOUSE	1.95	117.24	1570	1690	1	1.08	1570	1690	1	1.08	-	-	4	5	3	TMT6plex	53283	Alpha-1-syntrophin OS=Mus musculus GN=Snta1 PE=1 SV=1
3100	2979	P59017|B2L13_MOUSE	0.75	117.24	1190	1180	1	0.99	1190	1180	1	0.99	-	-	5	2	2	TMT6plex	46719	Bcl-2-like protein 13 OS=Mus musculus GN=Bcl2l13 PE=1 SV=2
2020	2553	Q8R3P0|ACY2_MOUSE	1.24	116.92	2330	2440	1	1.04	2330	2440	1	1.04	-	-	14	3	3	Carbamidomethylation; TMT6plex	35345	Aspartoacylase OS=Mus musculus GN=Aspa PE=1 SV=2
1786	2448	Q99JI4|PSMD6_MOUSE	3.77	116.89	1480	1450	1	0.98	1480	1450	1	0.98	-	-	9	5	3	TMT6plex; Deamidation (NQ)	45536	26S proteasome non-ATPase regulatory subunit 6 OS=Mus musculus GN=Psmd6 PE=1 SV=1
2591	3406	P62331|ARF6_MOUSE	2	116.6	2700	2260	1	0.84	2700	2260	1	0.84	-	-	14	3	2	TMT6plex	20082	ADP-ribosylation factor 6 OS=Mus musculus GN=Arf6 PE=1 SV=2
2528	3454	Q9CQH3|NDUB5_MOUSE	6.87	116.54	7510	6810	1	0.91	7510	6810	1	0.91	-	-	21	5	4	TMT6plex	21710	NADH dehydrogenase [ubiquinone] 1 beta subcomplex subunit 5 mitochondrial OS=Mus musculus GN=Ndufb5 PE=1 SV=1
2126	3172	Q3UUG6|TBC24_MOUSE	3.04	116.52	2580	2080	1	0.81	2580	2080	1	0.81	-	-	7	6	4	Carbamidomethylation; TMT6plex	63236	TBC1 domain family member 24 OS=Mus musculus GN=Tbc1d24 PE=1 SV=2
2907	3261	Q9CPR4|RL17_MOUSE	6.7	116.11	4240	3150	1	0.74	4240	3150	1	0.74	-	-	27	4	4	TMT6plex; Deamidation (NQ)	21423	60S ribosomal protein L17 OS=Mus musculus GN=Rpl17 PE=1 SV=3
2907	3262	tr|Q6ZWZ7|Q6ZWZ7_MOUSE	6.7	116.11	4240	3150	1	0.74	4240	3150	1	0.74	-	-	27	4	4	TMT6plex; Deamidation (NQ)	21397	60S ribosomal protein L17 OS=Mus musculus GN=Rpl17 PE=1 SV=1
1483	3671	F6ZDS4|TPR_MOUSE	1.51	116.01	329	266.249	1	0.81	329	266.249	1	0.81	-	-	0	4	1	TMT6plex; Deamidation (NQ)	273988	Nucleoprotein TPR OS=Mus musculus GN=Tpr PE=1 SV=1
2382	2838	Q9CY27|TECR_MOUSE	0.34	115.83	1620	1630	1	1.01	1620	1630	1	1.01	-	-	4	2	1	TMT6plex	36090	Very-long-chain enoyl-CoA reductase OS=Mus musculus GN=Tecr PE=1 SV=1
2902	2899	tr|Q99NF7|Q99NF7_MOUSE	0.69	115.77	438	399.971	1	0.91	438	399.971	1	0.91	-	-	3	4	1	TMT6plex	52111	Ppm1b protein OS=Mus musculus GN=Ppm1b PE=1 SV=1
1527	3455	O09111|NDUBB_MOUSE	3.8	115.74	5540	6230	1	1.12	5540	6230	1	1.12	-	-	23	3	3	TMT6plex; Deamidation (NQ)	17444	NADH dehydrogenase [ubiquinone] 1 beta subcomplex subunit 11 mitochondrial OS=Mus musculus GN=Ndufb11 PE=1 SV=2
2419	3954	tr|A0A0G2JEZ7|A0A0G2JEZ7_MOUSE	3.08	115.66	4570	4620	1	1.01	4570	4620	1	1.01	-	-	19	2	2	Carbamidomethylation; TMT6plex	16639	Tetraspanin OS=Mus musculus GN=Tspan2 PE=1 SV=1
2419	3960	tr|Q9D1X8|Q9D1X8_MOUSE	3.08	115.66	4570	4620	1	1.01	4570	4620	1	1.01	-	-	13	2	2	Carbamidomethylation; TMT6plex	23448	Tetraspanin OS=Mus musculus GN=Tspan2 PE=1 SV=1
2419	3961	Q922J6|TSN2_MOUSE	3.08	115.66	4570	4620	1	1.01	4570	4620	1	1.01	-	-	13	2	2	Carbamidomethylation; TMT6plex	24182	Tetraspanin-2 OS=Mus musculus GN=Tspan2 PE=1 SV=1
2419	4101	tr|A0A0G2JDX4|A0A0G2JDX4_MOUSE	3.08	115.66	4570	4620	1	1.01	4570	4620	1	1.01	-	-	33	2	2	Carbamidomethylation; TMT6plex	9522	Tetraspanin-2 (Fragment) OS=Mus musculus GN=Tspan2 PE=1 SV=1
2137	2915	tr|A0A0A0MQ90|A0A0A0MQ90_MOUSE	1.28	115.62	3940	3870	1	0.98	3940	3870	1	0.98	-	-	22	5	4	TMT6plex	17744	Protein S100-A13 OS=Mus musculus GN=S100a13 PE=1 SV=1
1718	3791	Q91VZ6|SMAP1_MOUSE	0.54	115.49	2000	1910	1	0.96	2000	1910	1	0.96	-	-	2	3	1	TMT6plex	47660	Stromal membrane-associated protein 1 OS=Mus musculus GN=Smap1 PE=1 SV=1
1148	3616	E9Q8I9|FRY_MOUSE	2.72	115.41	582	522.35	1	0.9	582	522.35	1	0.9	-	-	1	9	2	TMT6plex; Oxidation (M)	339093	Protein furry homolog OS=Mus musculus GN=Fry PE=1 SV=1
234	5531	A2ASS6|TITIN_MOUSE	1.76	115.23	241	211.925	1	0.88	241	211.925	1	0.88	-	-	0	35	1	TMT6plex	3906375	Titin OS=Mus musculus GN=Ttn PE=1 SV=1
2000	2650	P14131|RS16_MOUSE	4.19	115.21	3280	2950	1	0.9	3280	2950	1	0.9	-	-	39	6	6	TMT6plex; Deamidation (NQ)	16445	40S ribosomal protein S16 OS=Mus musculus GN=Rps16 PE=1 SV=4
1901	2588	P60840|ENSA_MOUSE	8.54	115.18	7000	6100	1	0.87	7000	6100	1	0.87	-	-	21	5	4	TMT6plex	13335	Alpha-endosulfine OS=Mus musculus GN=Ensa PE=1 SV=1
2400	2444	Q61282|PGCA_MOUSE	3.53	115.14	342	478.771	1	1.4	342	478.771	1	1.4	-	-	1	2	1	Carbamidomethylation; TMT6plex	221939	Aggrecan core protein OS=Mus musculus GN=Acan PE=1 SV=2
3087	2937	tr|A2AKH7|A2AKH7_MOUSE	3.11	114.9	1650	1500	1	0.91	1650	1500	1	0.91	-	-	13	3	3	TMT6plex	24132	Leucine-rich repeat-containing protein 57 (Fragment) OS=Mus musculus GN=Lrrc57 PE=1 SV=8
3087	2940	Q9D1G5|LRC57_MOUSE	3.11	114.9	1650	1500	1	0.91	1650	1500	1	0.91	-	-	12	3	3	TMT6plex	26760	Leucine-rich repeat-containing protein 57 OS=Mus musculus GN=Lrrc57 PE=1 SV=1
3087	2941	tr|Q8JZX5|Q8JZX5_MOUSE	3.11	114.9	1650	1500	1	0.91	1650	1500	1	0.91	-	-	12	3	3	TMT6plex	26726	Leucine rich repeat containing 57 OS=Mus musculus GN=Lrrc57 PE=1 SV=1
3146	3618	Q8BP67|RL24_MOUSE	4.76	114.53	1510	1090	1	0.72	1510	1090	1	0.72	-	-	20	3	3	Carbamidomethylation; TMT6plex	17779	60S ribosomal protein L24 OS=Mus musculus GN=Rpl24 PE=1 SV=2
2737	2859	O70194|EIF3D_MOUSE	2.69	114.23	2070	1610	1	0.78	2070	1610	1	0.78	-	-	3	3	2	TMT6plex; Deamidation (NQ)	63989	Eukaryotic translation initiation factor 3 subunit D OS=Mus musculus GN=Eif3d PE=1 SV=2
2206	3216	Q9WUA6|AKT3_MOUSE	3.48	114.23	215	328.334	1	1.53	215	328.334	1	1.53	-	-	3	3	1	TMT6plex	55714	RAC-gamma serine/threonine-protein kinase OS=Mus musculus GN=Akt3 PE=1 SV=1
2544	2879	Q99LB2|DHRS4_MOUSE	4.71	114.08	1470	1260	1	0.86	1470	1260	1	0.86	-	-	15	4	3	Carbamidomethylation; TMT6plex	29885	Dehydrogenase/reductase SDR family member 4 OS=Mus musculus GN=Dhrs4 PE=1 SV=3
2402	2807	O55234|PSB5_MOUSE	2.5	113.99	1200	1110	1	0.92	1200	1110	1	0.92	-	-	8	4	2	TMT6plex	28532	Proteasome subunit beta type-5 OS=Mus musculus GN=Psmb5 PE=1 SV=3
2581	3688	Q8VCD6|REEP2_MOUSE	1.56	113.91	241	286.546	1	1.19	241	286.546	1	1.19	-	-	6	1	1	TMT6plex	28437	Receptor expression-enhancing protein 2 OS=Mus musculus GN=Reep2 PE=1 SV=2
2345	4838	tr|Q8R3V2|Q8R3V2_MOUSE	5.53	113.83	524	392.807	1	0.75	524	392.807	1	0.75	-	-	6	2	1	Carbamidomethylation; TMT6plex	31098	Aminoacyl tRNA synthase complex-interacting multifunctional protein 2 OS=Mus musculus GN=Aimp2 PE=1 SV=1
2345	4841	Q8R010|AIMP2_MOUSE	5.53	113.83	524	392.807	1	0.75	524	392.807	1	0.75	-	-	5	2	1	Carbamidomethylation; TMT6plex	35378	Aminoacyl tRNA synthase complex-interacting multifunctional protein 2 OS=Mus musculus GN=Aimp2 PE=1 SV=2
2670	2828	tr|J3QK20|J3QK20_MOUSE	2.2	113.82	738	553.393	1	0.75	738	553.393	1	0.75	-	-	2	4	1	TMT6plex	57850	Voltage-dependent L-type calcium channel subunit beta-4 OS=Mus musculus GN=Cacnb4 PE=1 SV=1
2670	2829	Q8R0S4|CACB4_MOUSE	2.2	113.82	738	553.393	1	0.75	738	553.393	1	0.75	-	-	2	4	1	TMT6plex	57950	Voltage-dependent L-type calcium channel subunit beta-4 OS=Mus musculus GN=Cacnb4 PE=1 SV=2
1921	3272	Q9JIW9|RALB_MOUSE	1.91	113.8	406	520.559	1	1.28	406	520.559	1	1.28	-	-	4	4	1	TMT6plex	23349	Ras-related protein Ral-B OS=Mus musculus GN=Ralb PE=1 SV=1
1871	2585	tr|Z4YJR7|Z4YJR7_MOUSE	3.26	113.59	634	644.729	1	1.02	634	644.729	1	1.02	-	-	2	4	2	TMT6plex	121432	Sorbin and SH3 domain-containing protein 2 OS=Mus musculus GN=Sorbs2 PE=1 SV=1
1871	2590	tr|A0A0R4J1T1|A0A0R4J1T1_MOUSE	3.26	113.59	634	644.729	1	1.02	634	644.729	1	1.02	-	-	2	4	2	TMT6plex	127731	Sorbin and SH3 domain-containing protein 2 (Fragment) OS=Mus musculus GN=Sorbs2 PE=1 SV=1
1871	2594	Q3UTJ2|SRBS2_MOUSE	3.26	113.59	634	644.729	1	1.02	634	644.729	1	1.02	-	-	2	4	2	TMT6plex	132349	Sorbin and SH3 domain-containing protein 2 OS=Mus musculus GN=Sorbs2 PE=1 SV=2
1871	2595	tr|B7ZWM6|B7ZWM6_MOUSE	3.26	113.59	634	644.729	1	1.02	634	644.729	1	1.02	-	-	2	4	2	TMT6plex	134243	Sorbin and SH3 domain-containing protein 2 OS=Mus musculus GN=Sorbs2 PE=1 SV=1
1871	2598	tr|B9EKP8|B9EKP8_MOUSE	3.26	113.59	634	644.729	1	1.02	634	644.729	1	1.02	-	-	2	4	2	TMT6plex	136197	Sorbin and SH3 domain-containing protein 2 OS=Mus musculus GN=Sorbs2 PE=1 SV=1
1646	2664	P67871|CSK2B_MOUSE	2.23	113.42	3170	2810	1	0.89	3170	2810	1	0.89	-	-	21	5	4	Carbamidomethylation; TMT6plex	24942	Casein kinase II subunit beta OS=Mus musculus GN=Csnk2b PE=1 SV=1
1681	3318	tr|F7CBP1|F7CBP1_MOUSE	7.52	113.07	5840	4120	1	0.71	5840	4120	1	0.71	-	-	2	6	2	TMT6plex; Deamidation (NQ)	97889	Eukaryotic translation initiation factor 4 gamma 2 OS=Mus musculus GN=Eif4g2 PE=1 SV=1
1681	3328	tr|G3XA17|G3XA17_MOUSE	7.52	113.07	5840	4120	1	0.71	5840	4120	1	0.71	-	-	2	6	2	TMT6plex; Deamidation (NQ)	102100	Eukaryotic translation initiation factor 4 gamma 2 OS=Mus musculus GN=Eif4g2 PE=1 SV=1
1681	3329	Q62448|IF4G2_MOUSE	7.52	113.07	5840	4120	1	0.71	5840	4120	1	0.71	-	-	2	6	2	TMT6plex; Deamidation (NQ)	102105	Eukaryotic translation initiation factor 4 gamma 2 OS=Mus musculus GN=Eif4g2 PE=1 SV=2
2689	3747	tr|G3X9Q2|G3X9Q2_MOUSE	1.99	112.92	3730	3390	1	0.91	3730	3390	1	0.91	-	-	30	3	2	Carbamidomethylation; TMT6plex	7611	Guanine nucleotide-binding protein subunit gamma OS=Mus musculus GN=Gng7 PE=1 SV=1
2689	3749	Q61016|GBG7_MOUSE	1.99	112.92	3730	3390	1	0.91	3730	3390	1	0.91	-	-	31	3	2	Carbamidomethylation; TMT6plex	7480	Guanine nucleotide-binding protein G(I)/G(S)/G(O) subunit gamma-7 OS=Mus musculus GN=Gng7 PE=1 SV=2
2565	3222	Q8BFP9|PDK1_MOUSE	3.13	112.46	573	767.706	1	1.34	573	767.706	1	1.34	-	-	5	4	2	Carbamidomethylation; TMT6plex	48995	[Pyruvate dehydrogenase (acetyl-transferring)] kinase isozyme 1 mitochondrial OS=Mus musculus GN=Pdk1 PE=1 SV=2
3584	3386	Q8BFQ8|GALD1_MOUSE	2.07	112.34	532	531.902	1	1	532	531.902	1	1	-	-	20	2	2	Carbamidomethylation; TMT6plex; Deamidation (NQ)	23277	Glutamine amidotransferase-like class 1 domain-containing protein 1 OS=Mus musculus GN=Gatd1 PE=1 SV=1
2129	4040	Q9CXW4|RL11_MOUSE	3.56	112.27	2880	2710	1	0.94	2880	2710	1	0.94	-	-	15	5	3	TMT6plex	20252	60S ribosomal protein L11 OS=Mus musculus GN=Rpl11 PE=1 SV=4
2129	4041	tr|E9PYL9|E9PYL9_MOUSE	3.56	112.27	2880	2710	1	0.94	2880	2710	1	0.94	-	-	15	5	3	TMT6plex	20266	Uncharacterized protein OS=Mus musculus GN=Gm10036 PE=3 SV=1
2318	3420	tr|E9Q9E1|E9Q9E1_MOUSE	3.18	112.05	937	819.045	1	0.87	937	819.045	1	0.87	-	-	1	3	2	TMT6plex	175330	Eukaryotic translation initiation factor 4 gamma 1 OS=Mus musculus GN=Eif4g1 PE=1 SV=1
2027	3112	P63325|RS10_MOUSE	5.1	111.9	2720	2070	1	0.76	2720	2070	1	0.76	-	-	11	3	2	TMT6plex; Oxidation (M)	18916	40S ribosomal protein S10 OS=Mus musculus GN=Rps10 PE=1 SV=1
2546	2957	Q99L27|GMPR2_MOUSE	3.34	111.85	608	551.005	1	0.91	608	551.005	1	0.91	-	-	7	6	2	Carbamidomethylation; TMT6plex	38019	GMP reductase 2 OS=Mus musculus GN=Gmpr2 PE=1 SV=2
2875	2525	Q8C3W1|CA198_MOUSE	4.02	111.8	1180	996.943	1	0.85	1180	996.943	1	0.85	-	-	10	2	2	TMT6plex	35316	Uncharacterized protein C1orf198 homolog OS=Mus musculus PE=1 SV=1
3097	2635	Q9QZD9|EIF3I_MOUSE	3.33	111.74	2310	1990	1	0.86	2310	1990	1	0.86	-	-	14	4	4	TMT6plex	36461	Eukaryotic translation initiation factor 3 subunit I OS=Mus musculus GN=Eif3i PE=1 SV=1
1492	3667	Q9ESE1|LRBA_MOUSE	1.84	111.72	592	508.62	1	0.86	592	508.62	1	0.86	-	-	0	6	1	TMT6plex; Oxidation (M)	317062	Lipopolysaccharide-responsive and beige-like anchor protein OS=Mus musculus GN=Lrba PE=1 SV=1
1694	3331	tr|B2RQC7|B2RQC7_MOUSE	8.89	111.32	266	305.053	1	1.15	266	305.053	1	1.15	-	-	1	4	1	TMT6plex	146697	DIP2 disco-interacting protein 2 homolog B (Drosophila) OS=Mus musculus GN=Dip2b PE=1 SV=1
1694	3332	tr|D3Z5G8|D3Z5G8_MOUSE	8.89	111.32	266	305.053	1	1.15	266	305.053	1	1.15	-	-	1	4	1	TMT6plex	146768	Disco-interacting protein 2 homolog B OS=Mus musculus GN=Dip2b PE=1 SV=1
1694	3347	Q3UH60|DIP2B_MOUSE	8.89	111.32	266	305.053	1	1.15	266	305.053	1	1.15	-	-	1	4	1	TMT6plex	171125	Disco-interacting protein 2 homolog B OS=Mus musculus GN=Dip2b PE=1 SV=1
3302	2484	Q9CTY5|MICU3_MOUSE	4.4	110.97	1030	792.181	1	0.77	1030	792.181	1	0.77	-	-	5	2	2	TMT6plex	59810	Calcium uptake protein 3 mitochondrial OS=Mus musculus GN=Micu3 PE=2 SV=2
2695	2462	tr|D3YTT4|D3YTT4_MOUSE	3.1	110.79	1860	1700	1	0.91	1860	1700	1	0.91	-	-	8	3	3	TMT6plex; Deamidation (NQ)	45076	Isobutyryl-CoA dehydrogenase mitochondrial OS=Mus musculus GN=Acad8 PE=1 SV=1
2695	2463	tr|A0A0R4J0P1|A0A0R4J0P1_MOUSE	3.1	110.79	1860	1700	1	0.91	1860	1700	1	0.91	-	-	8	3	3	TMT6plex; Deamidation (NQ)	45092	Acyl-Coenzyme A dehydrogenase family member 8 OS=Mus musculus GN=Acad8 PE=1 SV=1
2695	2469	Q9D7B6|ACAD8_MOUSE	3.1	110.79	1860	1700	1	0.91	1860	1700	1	0.91	-	-	8	3	3	TMT6plex; Deamidation (NQ)	45020	Isobutyryl-CoA dehydrogenase mitochondrial OS=Mus musculus GN=Acad8 PE=1 SV=2
2944	3050	Q9CQC9|SAR1B_MOUSE	2.57	110.75	380	377.286	1	0.99	380	377.286	1	0.99	-	-	6	4	1	TMT6plex	22382	GTP-binding protein SAR1b OS=Mus musculus GN=Sar1b PE=1 SV=1
2288	3062	P31230|AIMP1_MOUSE	2.3	110.47	1440	1380	1	0.96	1440	1380	1	0.96	-	-	12	4	3	Carbamidomethylation; TMT6plex	33997	Aminoacyl tRNA synthase complex-interacting multifunctional protein 1 OS=Mus musculus GN=Aimp1 PE=1 SV=2
2288	3064	tr|Q3UZG4|Q3UZG4_MOUSE	2.3	110.47	1440	1380	1	0.96	1440	1380	1	0.96	-	-	12	4	3	Carbamidomethylation; TMT6plex	35167	Aminoacyl tRNA synthase complex-interacting multifunctional protein 1 OS=Mus musculus GN=Aimp1 PE=1 SV=1
3446	4021	tr|Q45VK5|Q45VK5_MOUSE	2.83	110.09	355	340.274	1	0.96	355	340.274	1	0.96	-	-	2	2	1	TMT6plex	76348	Interleukin enhancer-binding factor 3 OS=Mus musculus GN=Ilf3 PE=1 SV=1
3446	4091	Q9Z1X4|ILF3_MOUSE	2.83	110.09	355	340.274	1	0.96	355	340.274	1	0.96	-	-	1	2	1	TMT6plex	96021	Interleukin enhancer-binding factor 3 OS=Mus musculus GN=Ilf3 PE=1 SV=2
3446	4107	tr|A0A1L1STE4|A0A1L1STE4_MOUSE	2.83	110.09	355	340.274	1	0.96	355	340.274	1	0.96	-	-	1	2	1	TMT6plex	97453	Interleukin enhancer-binding factor 3 OS=Mus musculus GN=Ilf3 PE=1 SV=1
3516	3008	Q922Q9|CHID1_MOUSE	0.8	110.02	519	503.844	1	0.97	519	503.844	1	0.97	-	-	4	1	1	TMT6plex	44906	Chitinase domain-containing protein 1 OS=Mus musculus GN=Chid1 PE=1 SV=1
3516	3009	tr|A0A0R4J242|A0A0R4J242_MOUSE	0.8	110.02	519	503.844	1	0.97	519	503.844	1	0.97	-	-	4	1	1	TMT6plex	45205	Chitinase domain-containing protein 1 OS=Mus musculus GN=Chid1 PE=1 SV=1
3516	3014	tr|A0A0R4J058|A0A0R4J058_MOUSE	0.8	110.02	519	503.844	1	0.97	519	503.844	1	0.97	-	-	5	1	1	TMT6plex	35540	Chitinase domain-containing protein 1 OS=Mus musculus GN=Chid1 PE=1 SV=1
4026	3730	P0C192|LRC4B_MOUSE	2.32	110	317	234.61	1	0.74	317	234.61	1	0.74	-	-	2	1	1	TMT6plex	76156	Leucine-rich repeat-containing protein 4B OS=Mus musculus GN=Lrrc4b PE=1 SV=1
3119	3379	Q99L45|IF2B_MOUSE	1.76	109.96	1410	1240	1	0.88	1410	1240	1	0.88	-	-	10	4	3	TMT6plex	38092	Eukaryotic translation initiation factor 2 subunit 2 OS=Mus musculus GN=Eif2s2 PE=1 SV=1
2687	2564	Q69ZK9|NLGN2_MOUSE	2.62	109.81	334	325.947	1	0.98	334	325.947	1	0.98	-	-	2	2	1	Carbamidomethylation; TMT6plex	90989	Neuroligin-2 OS=Mus musculus GN=Nlgn2 PE=1 SV=2
2281	3437	Q80T41|GABR2_MOUSE	2.24	109.29	253	319.977	1	1.26	253	319.977	1	1.26	-	-	1	3	1	TMT6plex	105666	Gamma-aminobutyric acid type B receptor subunit 2 OS=Mus musculus GN=Gabbr2 PE=1 SV=2
2008	3441	Q9CYR6|AGM1_MOUSE	1.82	109.22	727	726.514	1	1	727	726.514	1	1	-	-	4	4	2	Carbamidomethylation; TMT6plex	59453	Phosphoacetylglucosamine mutase OS=Mus musculus GN=Pgm3 PE=1 SV=1
3437	3668	tr|G3X920|G3X920_MOUSE	2.24	109.21	317	235.804	1	0.74	317	235.804	1	0.74	-	-	1	2	1	TMT6plex	75402	Armadillo repeat containing 8 isoform CRA_b OS=Mus musculus GN=Armc8 PE=1 SV=1
3437	3678	Q9DBR3|ARMC8_MOUSE	2.24	109.21	317	235.804	1	0.74	317	235.804	1	0.74	-	-	1	2	1	TMT6plex	75364	Armadillo repeat-containing protein 8 OS=Mus musculus GN=Armc8 PE=1 SV=2
3303	3370	P29699|FETUA_MOUSE	5.58	109.19	1340	976.049	1	0.73	1340	976.049	1	0.73	-	-	9	3	3	Carbamidomethylation; TMT6plex; Deamidation (NQ)	37326	Alpha-2-HS-glycoprotein OS=Mus musculus GN=Ahsg PE=1 SV=1
2404	3533	Q9D8S4|ORN_MOUSE	3.89	109.09	903	661.445	1	0.73	903	661.445	1	0.73	-	-	3	2	1	TMT6plex	26739	Oligoribonuclease mitochondrial OS=Mus musculus GN=Rexo2 PE=1 SV=2
3152	3439	P15327|PMGE_MOUSE	3.03	109.07	596	723.53	1	1.21	596	723.53	1	1.21	-	-	8	3	2	Carbamidomethylation; TMT6plex	29978	Bisphosphoglycerate mutase OS=Mus musculus GN=Bpgm PE=1 SV=2
2527	3404	Q8JZK9|HMCS1_MOUSE	4.18	108.96	937	990.973	1	1.06	937	990.973	1	1.06	-	-	4	3	2	TMT6plex	57569	Hydroxymethylglutaryl-CoA synthase cytoplasmic OS=Mus musculus GN=Hmgcs1 PE=1 SV=1
1195	5017	tr|E9Q2E4|E9Q2E4_MOUSE	4.7	108.8	444	535.484	1	1.21	444	535.484	1	1.21	-	-	1	10	2	TMT6plex	484134	Uncharacterized protein OS=Mus musculus GN=Hectd4 PE=1 SV=2
1190	5539	Q9D0J8|PTMS_MOUSE	4.94	108.64	13400	10600	1	0.79	13400	10600	1	0.79	-	-	23	3	3	TMT6plex	11430	Parathymosin OS=Mus musculus GN=Ptms PE=1 SV=3
3269	3531	tr|Q8C446|Q8C446_MOUSE	3.84	108.48	600	435.789	1	0.73	600	435.789	1	0.73	-	-	3	2	1	TMT6plex	54283	Gamma-aminobutyric acid (GABA-A) receptor subunit beta 3 isoform CRA_b OS=Mus musculus GN=Gabrb3 PE=1 SV=1
3269	3532	P63080|GBRB3_MOUSE	3.84	108.48	600	435.789	1	0.73	600	435.789	1	0.73	-	-	3	2	1	TMT6plex	54166	Gamma-aminobutyric acid receptor subunit beta-3 OS=Mus musculus GN=Gabrb3 PE=2 SV=1
3269	3534	tr|F6ZYH6|F6ZYH6_MOUSE	3.84	108.48	600	435.789	1	0.73	600	435.789	1	0.73	-	-	3	2	1	TMT6plex	56967	Gamma-aminobutyric acid receptor subunit beta-3 OS=Mus musculus GN=Gabrb3 PE=1 SV=1
2093	3803	P54822|PUR8_MOUSE	2.82	108.21	972	983.809	1	1.01	972	983.809	1	1.01	-	-	4	3	2	TMT6plex	54866	Adenylosuccinate lyase OS=Mus musculus GN=Adsl PE=1 SV=2
3874	3928	Q8BG18|NECA1_MOUSE	2.45	107.81	652	639.954	1	0.98	652	639.954	1	0.98	-	-	2	2	1	TMT6plex	40934	N-terminal EF-hand calcium-binding protein 1 OS=Mus musculus GN=Necab1 PE=1 SV=1
2906	3126	Q62376|RU17_MOUSE	2.01	107.64	701	632.79	1	0.9	701	632.79	1	0.9	-	-	5	4	2	TMT6plex	51992	U1 small nuclear ribonucleoprotein 70 kDa OS=Mus musculus GN=Snrnp70 PE=1 SV=2
1766	3775	Q68FL6|SYMC_MOUSE	5.21	107.44	1000	824.418	1	0.82	1000	824.418	1	0.82	-	-	4	6	3	TMT6plex	101431	Methionine--tRNA ligase cytoplasmic OS=Mus musculus GN=Mars PE=1 SV=1
1766	3777	tr|E9QB02|E9QB02_MOUSE	5.21	107.44	1000	824.418	1	0.82	1000	824.418	1	0.82	-	-	4	6	3	TMT6plex	102373	Methionine--tRNA ligase cytoplasmic OS=Mus musculus GN=Mars PE=1 SV=1
4183	4200	P61080|UB2D1_MOUSE	1.37	106.93	279	333.11	1	1.19	279	333.11	1	1.19	-	-	4	2	1	TMT6plex	16602	Ubiquitin-conjugating enzyme E2 D1 OS=Mus musculus GN=Ube2d1 PE=2 SV=1
2407	2869	Q3UGC7|EI3JA_MOUSE	1.78	106.76	1850	1850	1	1	1850	1850	1	1	-	-	11	3	3	Carbamidomethylation; TMT6plex	29344	Eukaryotic translation initiation factor 3 subunit J-A OS=Mus musculus GN=Eif3j1 PE=2 SV=1
2407	2870	Q66JS6|EI3JB_MOUSE	1.78	106.76	1850	1850	1	1	1850	1850	1	1	-	-	11	3	3	Carbamidomethylation; TMT6plex	29486	Eukaryotic translation initiation factor 3 subunit J-B OS=Mus musculus GN=Eif3j2 PE=1 SV=1
3090	3656	tr|A0A0N4SVS6|A0A0N4SVS6_MOUSE	1.74	106.75	266	251.922	1	0.95	266	251.922	1	0.95	-	-	5	1	1	Carbamidomethylation; TMT6plex	18799	Cellular nucleic acid-binding protein OS=Mus musculus GN=Cnbp PE=1 SV=1
3090	3657	P53996|CNBP_MOUSE	1.74	106.75	266	251.922	1	0.95	266	251.922	1	0.95	-	-	4	1	1	Carbamidomethylation; TMT6plex	19592	Cellular nucleic acid-binding protein OS=Mus musculus GN=Cnbp PE=1 SV=2
3333	2777	Q61187|TS101_MOUSE	5	106.63	1470	1180	1	0.8	1470	1180	1	0.8	-	-	8	4	3	TMT6plex	44124	Tumor susceptibility gene 101 protein OS=Mus musculus GN=Tsg101 PE=1 SV=2
2296	4103	tr|D3Z3I3|D3Z3I3_MOUSE	2.26	106.62	798	626.223	1	0.78	798	626.223	1	0.78	-	-	8	2	1	Carbamidomethylation; TMT6plex	14661	Nitrilase homolog 1 (Fragment) OS=Mus musculus GN=Nit1 PE=1 SV=1
2296	4104	tr|D3YY53|D3YY53_MOUSE	2.26	106.62	798	626.223	1	0.78	798	626.223	1	0.78	-	-	5	2	1	Carbamidomethylation; TMT6plex	26236	Nitrilase homolog 1 OS=Mus musculus GN=Nit1 PE=1 SV=1
2296	4105	Q8VDK1|NIT1_MOUSE	2.26	106.62	798	626.223	1	0.78	798	626.223	1	0.78	-	-	3	2	1	Carbamidomethylation; TMT6plex	35705	Nitrilase homolog 1 OS=Mus musculus GN=Nit1 PE=1 SV=2
3853	3005	tr|B1AT84|B1AT84_MOUSE	1.06	106.56	291	268.637	1	0.92	291	268.637	1	0.92	-	-	8	1	1	TMT6plex	19540	Phosphoribosyl pyrophosphate synthase-associated protein 1 (Fragment) OS=Mus musculus GN=Prpsap1 PE=1 SV=1
3030	3204	Q8BWT5|DIP2A_MOUSE	6.95	106.5	836	602.941	1	0.72	836	602.941	1	0.72	-	-	1	4	2	TMT6plex	165254	Disco-interacting protein 2 homolog A OS=Mus musculus GN=Dip2a PE=1 SV=3
3254	3051	tr|Q0VF62|Q0VF62_MOUSE	5.39	106.45	367	204.164	1	0.56	367	204.164	1	0.56	-	-	1	1	1	Carbamidomethylation; TMT6plex	99465	Bcas3 protein OS=Mus musculus GN=Bcas3 PE=1 SV=1
3254	3053	Q8CCN5|BCAS3_MOUSE	5.39	106.45	367	204.164	1	0.56	367	204.164	1	0.56	-	-	1	1	1	Carbamidomethylation; TMT6plex	101021	Breast carcinoma-amplified sequence 3 homolog OS=Mus musculus GN=Bcas3 PE=1 SV=2
3254	3054	tr|B1AR74|B1AR74_MOUSE	5.39	106.45	367	204.164	1	0.56	367	204.164	1	0.56	-	-	1	1	1	Carbamidomethylation; TMT6plex	102772	Breast carcinoma-amplified sequence 3 homolog OS=Mus musculus GN=Bcas3 PE=1 SV=1
3337	3214	O70591|PFD2_MOUSE	3.34	106.37	1490	1240	1	0.83	1490	1240	1	0.83	-	-	17	5	3	TMT6plex	16534	Prefoldin subunit 2 OS=Mus musculus GN=Pfdn2 PE=1 SV=2
1141	4257	P56135|ATPK_MOUSE	2.08	106.36	6530	7250	1	1.11	6530	7250	1	1.11	-	-	26	3	2	TMT6plex; Oxidation (M)	10344	ATP synthase subunit f mitochondrial OS=Mus musculus GN=Atp5j2 PE=1 SV=3
2801	3563	Q58A65|JIP4_MOUSE	2.97	106.35	992	685.323	1	0.69	992	685.323	1	0.69	-	-	1	3	1	TMT6plex	146219	C-Jun-amino-terminal kinase-interacting protein 4 OS=Mus musculus GN=Spag9 PE=1 SV=2
4513	4109	P12961|7B2_MOUSE	2.04	106.11	646	697.263	1	1.08	646	697.263	1	1.08	-	-	12	2	2	Carbamidomethylation; TMT6plex	23866	Neuroendocrine protein 7B2 OS=Mus musculus GN=Scg5 PE=1 SV=1
3529	3520	Q8R5J9|PRAF3_MOUSE	1.46	105.56	2840	2490	1	0.88	2840	2490	1	0.88	-	-	10	2	2	TMT6plex	21558	PRA1 family protein 3 OS=Mus musculus GN=Arl6ip5 PE=1 SV=2
2893	3359	Q6P2B1|TNPO3_MOUSE	1.96	105.55	659	564.138	1	0.86	659	564.138	1	0.86	-	-	1	2	1	Carbamidomethylation; TMT6plex	104170	Transportin-3 OS=Mus musculus GN=Tnpo3 PE=1 SV=1
3339	4048	O89023|TPP1_MOUSE	4.52	105.47	1820	2550	1	1.4	1820	2550	1	1.4	-	-	4	2	2	TMT6plex	61342	Tripeptidyl-peptidase 1 OS=Mus musculus GN=Tpp1 PE=1 SV=2
1924	2999	Q9JMG7|HDGR3_MOUSE	2.35	105.43	5350	4460	1	0.83	5350	4460	1	0.83	-	-	14	3	3	TMT6plex	22431	Hepatoma-derived growth factor-related protein 3 OS=Mus musculus GN=Hdgfl3 PE=1 SV=2
3091	4218	tr|Q3TMX0|Q3TMX0_MOUSE	1.09	105.29	595	665.026	1	1.12	595	665.026	1	1.12	-	-	6	4	2	TMT6plex	32251	MCG4375 isoform CRA_b OS=Mus musculus GN=Sdcbp PE=1 SV=1
3091	4219	O08992|SDCB1_MOUSE	1.09	105.29	595	665.026	1	1.12	595	665.026	1	1.12	-	-	6	4	2	TMT6plex	32379	Syntenin-1 OS=Mus musculus GN=Sdcbp PE=1 SV=1
3117	3221	Q8R2Y0|ABHD6_MOUSE	6.68	105.28	1090	715.172	1	0.66	1090	715.172	1	0.66	-	-	11	3	3	TMT6plex	38205	Monoacylglycerol lipase ABHD6 OS=Mus musculus GN=Abhd6 PE=1 SV=1
2009	3724	O89051|ITM2B_MOUSE	0.67	105.22	582	535.484	1	0.92	582	535.484	1	0.92	-	-	3	2	1	TMT6plex; Deamidation (NQ)	30260	Integral membrane protein 2B OS=Mus musculus GN=Itm2b PE=1 SV=1
2931	3968	Q9WVA2|TIM8A_MOUSE	1.56	105.21	1030	1020	1	0.99	1030	1020	1	0.99	-	-	23	3	2	Carbamidomethylation; TMT6plex	11042	Mitochondrial import inner membrane translocase subunit Tim8 A OS=Mus musculus GN=Timm8a1 PE=1 SV=1
2879	3342	P01869|IGH1M_MOUSE	8.07	105.2	1660	2180	1	1.31	1660	2180	1	1.31	-	-	8	4	3	Carbamidomethylation; TMT6plex	43387	Ig gamma-1 chain C region membrane-bound form OS=Mus musculus GN=Ighg1 PE=1 SV=2
2879	3343	tr|A0A0A6YWR2|A0A0A6YWR2_MOUSE	8.07	105.2	1660	2180	1	1.31	1660	2180	1	1.31	-	-	8	4	3	Carbamidomethylation; TMT6plex	43434	Ig gamma-1 chain C region secreted form (Fragment) OS=Mus musculus GN=Ighg1 PE=1 SV=1
1907	2978	Q9DC70|NDUS7_MOUSE	4.18	105.03	4030	3530	1	0.88	4030	3530	1	0.88	-	-	15	5	4	TMT6plex	24683	NADH dehydrogenase [ubiquinone] iron-sulfur protein 7 mitochondrial OS=Mus musculus GN=Ndufs7 PE=1 SV=1
2895	4244	Q9CQ92|FIS1_MOUSE	3.41	104.83	215	324.753	1	1.51	215	324.753	1	1.51	-	-	7	2	1	TMT6plex	17009	Mitochondrial fission 1 protein OS=Mus musculus GN=Fis1 PE=1 SV=1
3134	3675	tr|Q564G0|Q564G0_MOUSE	0.92	104.58	1210	1110	1	0.92	1210	1110	1	0.92	-	-	6	3	2	TMT6plex	24032	Guanylate kinase OS=Mus musculus GN=Guk1 PE=1 SV=1
3134	3682	tr|E9Q7K1|E9Q7K1_MOUSE	0.92	104.58	1210	1110	1	0.92	1210	1110	1	0.92	-	-	7	3	2	TMT6plex	22843	Guanylate kinase OS=Mus musculus GN=Guk1 PE=1 SV=1
3134	3689	Q64520|KGUA_MOUSE	0.92	104.58	1210	1110	1	0.92	1210	1110	1	0.92	-	-	7	3	2	TMT6plex	21918	Guanylate kinase OS=Mus musculus GN=Guk1 PE=1 SV=2
2529	3704	tr|E9PUA7|E9PUA7_MOUSE	4.2	104.46	2730	2690	1	0.99	2730	2690	1	0.99	-	-	24	5	4	TMT6plex	21134	Tumor protein D52 OS=Mus musculus GN=Tpd52 PE=1 SV=1
2890	2639	Q9JK42|PDK2_MOUSE	0.94	104.43	1330	1430	1	1.08	1330	1430	1	1.08	-	-	4	3	2	TMT6plex	46041	[Pyruvate dehydrogenase (acetyl-transferring)] kinase isozyme 2 mitochondrial OS=Mus musculus GN=Pdk2 PE=1 SV=2
2945	4085	tr|D3Z7I1|D3Z7I1_MOUSE	3.51	104.4	1830	1200	1	0.66	1830	1200	1	0.66	-	-	7	1	1	TMT6plex	14735	40S ribosomal protein S14 (Fragment) OS=Mus musculus GN=Rps14 PE=1 SV=1
2389	2565	Q8BJH1|ZC21A_MOUSE	1.89	104.27	1000	920.53	1	0.92	1000	920.53	1	0.92	-	-	5	3	2	TMT6plex	35152	Zinc finger C2HC domain-containing protein 1A OS=Mus musculus GN=Zc2hc1a PE=1 SV=1
3593	3694	tr|F6W5Q8|F6W5Q8_MOUSE	2.54	103.96	1180	1130	1	0.96	1180	1130	1	0.96	-	-	7	3	2	Carbamidomethylation; TMT6plex	27951	Vacuolar protein sorting-associated protein VTA1 homolog (Fragment) OS=Mus musculus GN=Vta1 PE=1 SV=8
2411	4330	P47955|RLA1_MOUSE	1.08	103.93	2180	2100	1	0.96	2180	2100	1	0.96	-	-	14	2	1	TMT6plex	11475	60S acidic ribosomal protein P1 OS=Mus musculus GN=Rplp1 PE=1 SV=1
2244	2818	P16388|KCNA1_MOUSE	2.28	103.89	614	576.675	1	0.94	614	576.675	1	0.94	-	-	2	2	1	TMT6plex	56409	Potassium voltage-gated channel subfamily A member 1 OS=Mus musculus GN=Kcna1 PE=1 SV=1
2268	3853	tr|G3X8R0|G3X8R0_MOUSE	3.12	103.76	2880	2580	1	0.9	2880	2580	1	0.9	-	-	11	3	2	TMT6plex	21447	Receptor expression-enhancing protein OS=Mus musculus GN=Reep5 PE=1 SV=1
3047	3175	Q8CHT0|AL4A1_MOUSE	1.86	103.52	456	533.096	1	1.17	456	533.096	1	1.17	-	-	5	2	2	TMT6plex	61841	Delta-1-pyrroline-5-carboxylate dehydrogenase mitochondrial OS=Mus musculus GN=Aldh4a1 PE=1 SV=3
1631	2996	Q9R226|KHDR3_MOUSE	6.77	103.39	852	519.365	1	0.61	852	519.365	1	0.61	-	-	6	6	2	TMT6plex	38808	KH domain-containing RNA-binding signal transduction-associated protein 3 OS=Mus musculus GN=Khdrbs3 PE=1 SV=1
[truncated: 457 more rows]

## Sheet: hippocampus-proteins-peptides
Protein Group	Protein ID	Protein Accession	Peptide	Used	Unique	-10lgP	Quality Score	Mass	ppm	m/z	RT	Fraction	Scan	Source File	#Spec	Intensity Young	Intensity Aged	Ratio Young	Ratio Aged	Intensity Young	Intensity Aged	Ratio Young	Ratio Aged	SD Young	SD Aged	Start	End	PTM	AScore
21	15	Q62261|SPTB2_MOUSE	R.Q(+229.16)NLLSQSHAYQQFLR.D	Y	Y	94.82	24.46	2061.1	-1.7	688.038	43.45	7	53838	CDC HF7 20180131.wiff	2	701	708.008	1.02	1.03	701	708.008	1	1.01	0	0.06	1162	1176	TMT6plex	Q1:TMT6plex:1000.00
21	15	Q62261|SPTB2_MOUSE	K.L(+229.16)ESEHPDQAQAILSR.L	Y	Y	94.54	20.47	1922.01	1.9	641.677	24.97	2	39547	CDC HF2 20180131.wiff	4	2750	2390	1.13	0.98	2750	2390	1	0.87	0	0.22	1022	1036	TMT6plex	L1:TMT6plex:1000.00
21	15	Q62261|SPTB2_MOUSE	K.H(+229.16)QILEQAVEDYAETVHQLSK(+229.16).T	Y	Y	86.44	24.03	2795.49	-16.8	699.867	66.76	5	70661	CDC HF5 20180131.wiff	5	3550	2920	1.15	0.95	3550	2920	1	0.82	0	0.21	1634	1653	TMT6plex	H1:TMT6plex:1000.00;K20:TMT6plex:1000.00
21	15	Q62261|SPTB2_MOUSE	K.S(+229.16)AASGIPYHSEVPVSLK(+229.16).E	Y	Y	84.79	25.34	2199.23	-17	734.072	33.51	5	48978	CDC HF5 20180131.wiff	12	16800	13600	1.1	0.89	16800	13600	1	0.81	0	0.25	2241	2257	TMT6plex	S1:TMT6plex:1000.00;K17:TMT6plex:1000.00
21	15	Q62261|SPTB2_MOUSE	K.S(+229.16)NAHYNLQNAFNLAEQHLGLTK(+229.16).L	Y	Y	84.78	22.49	2940.56	-0.3	736.147	60.27	7	64779	CDC HF7 20180131.wiff	3	1950	1700	1.06	0.93	1950	1700	1	0.87	0	0.13	228	249	TMT6plex	S1:TMT6plex:1000.00;K22:TMT6plex:1000.00
21	15	Q62261|SPTB2_MOUSE	R.A(+229.16)QTLPTSVVTITSESSPGK(+229.16).R	Y	Y	84.6	23.53	2360.32	-22.4	787.763	42.21	5	54652	CDC HF5 20180131.wiff	3	2310	2070	1.14	1.02	2310	2070	1	0.89	0	0.06	2325	2343	TMT6plex	A1:TMT6plex:1000.00;K19:TMT6plex:1000.00
21	15	Q62261|SPTB2_MOUSE	R.T(+229.16)LETPAAQMEGFLNR.K	Y	Y	84.05	21.85	1905.98	-12.9	636.326	57.91	5	64900	CDC HF5 20180131.wiff	1	367	309.231	1.1	0.93	367	309.231	1	0.84	-	-	2191	2205	TMT6plex	T1:TMT6plex:1000.00
21	15	Q62261|SPTB2_MOUSE	R.L(+229.16)VSQDNFGFDLPAVEAATK(+229.16).K	Y	Y	83.08	22.68	2479.34	-27.2	827.43	68.74	5	71942	CDC HF5 20180131.wiff	7	6440	5710	1.09	0.97	6440	5710	1	0.89	0	0.14	444	462	TMT6plex	L1:TMT6plex:1000.00;K19:TMT6plex:1000.00
21	15	Q62261|SPTB2_MOUSE	K.D(+229.16)ALLSALSIQNYHLEC(+57.02)NETK(+229.16).S	Y	Y	80.56	21.45	2776.45	6.2	695.123	59.29	5	65803	CDC HF5 20180131.wiff	4	2400	2100	1.11	0.97	2400	2100	1	0.88	0	0.13	949	968	TMT6plex; Carbamidomethylation	D1:TMT6plex:1000.00;C16:Carbamidomethylation:1000.00;K20:TMT6plex:1000.00
21	15	Q62261|SPTB2_MOUSE	R.M(+229.16)HTTFEHDIQALGTQVR.Q	Y	Y	80.39	20.93	2212.13	1.9	554.04	36.91	5	51194	CDC HF5 20180131.wiff	2	583	577.869	1.03	1.02	583	577.869	1	0.99	0	0.14	1845	1861	TMT6plex	M1:TMT6plex:1000.00
21	15	Q62261|SPTB2_MOUSE	K.E(+229.16)IEELQSQAQALSQEGK(+229.16).S	Y	Y	80.3	22.03	2345.25	-0.2	782.756	52.02	2	57059	CDC HF2 20180131.wiff	6	2480	2920	1.01	1.19	2480	2920	1	1.18	0	0.23	1435	1451	TMT6plex	E1:TMT6plex:1000.00;K17:TMT6plex:1000.00
21	15	Q62261|SPTB2_MOUSE	R.T(+229.16)QILAASYELHK(+229.16).F	Y	Y	79.8	22.33	1831.06	-0.4	611.361	35.78	5	50458	CDC HF5 20180131.wiff	6	6490	5580	1.09	0.94	6490	5580	1	0.86	0	0.15	1798	1809	TMT6plex	T1:TMT6plex:1000.00;K12:TMT6plex:1000.00
21	15	Q62261|SPTB2_MOUSE	K.I(+229.16)VSSNDVGHDEYSTQSLVK(+229.16).K	Y	Y	79.22	23.42	2535.32	3	846.117	33.36	3	45382	CDC HF3 20180131.wiff	4	2940	2560	1.06	0.92	2940	2560	1	0.87	0	0.26	766	784	TMT6plex	I1:TMT6plex:1000.00;K19:TMT6plex:1000.00
21	15	Q62261|SPTB2_MOUSE	K.V(+229.16)IESTQDLGNDLAGVMALQR.K	Y	Y	78.73	21.62	2358.24	0.1	787.088	69.3	4	68251	CDC HF4 20180131.wiff	2	570	694.875	0.97	1.19	570	694.875	1	1.22	0	0.21	977	996	TMT6plex	V1:TMT6plex:1000.00
21	15	Q62261|SPTB2_MOUSE	K.D(+229.16)DEEMNTWIQAISSAISSDK(+229.16).H	Y	Y	78.23	17.74	2697.32	-10.3	675.331	81.52	5	80203	CDC HF5 20180131.wiff	2	546	487.129	1.09	0.98	546	487.129	1	0.89	0	0.21	2290	2309	TMT6plex	D1:TMT6plex:1000.00;K20:TMT6plex:1000.00
21	15	Q62261|SPTB2_MOUSE	R.D(+229.16)ASVAEAWLLGQEPYLSSR.E	Y	Y	77.07	17.01	2320.19	2.4	774.406	69.87	4	68620	CDC HF4 20180131.wiff	2	716	701.442	1	0.98	716	701.442	1	0.98	0	0.09	2025	2043	TMT6plex	D1:TMT6plex:1000.00
21	15	Q62261|SPTB2_MOUSE	K.F(+229.16)ANSLVGVQQQLQAFNTYR.T	Y	Y	77.01	21.47	2412.28	-3.9	805.096	68.94	8	81147	CDC HF8 20180131.wiff	1	304	321.171	1.1	1.16	304	321.171	1	1.06	-	-	330	348	TMT6plex	F1:TMT6plex:1000.00
21	15	Q62261|SPTB2_MOUSE	R.D(+229.16)VSSVELLMNNHQGIK(+229.16).A	Y	Y	76.28	22.47	2241.22	4.2	561.314	45.56	5	56836	CDC HF5 20180131.wiff	10	10200	10200	0.97	0.97	10200	10200	1	1	0	0.18	1942	1957	TMT6plex	D1:TMT6plex:1000.00;K16:TMT6plex:1000.00
21	15	Q62261|SPTB2_MOUSE	K.H(+229.16)EAIETDIAAYEER.V	Y	Y	75.69	17.26	1874.92	0.8	625.981	32.36	1	44127	CDC HF1 20180131.wiff	3	1070	978.437	1.12	1.03	1070	978.437	1	0.92	0	0.17	464	477	TMT6plex	H1:TMT6plex:1000.00
21	15	Q62261|SPTB2_MOUSE	K.S(+229.16)ALPAQSAATLPAR.T	Y	Y	75.5	21.15	1581.9	5.5	528.312	21.63	5	41249	CDC HF5 20180131.wiff	5	4510	4360	1.07	1.03	4510	4360	1	0.97	0	0.18	2177	2190	TMT6plex	S1:TMT6plex:1000.00
21	15	Q62261|SPTB2_MOUSE	R.M(+229.16)PLATSTDHGHNLQTVQLLIK(+229.16).K	Y	Y	75.27	22.45	2774.55	-2	694.644	48.44	7	57094	CDC HF7 20180131.wiff	1	1150	883.518	1.14	0.87	1150	883.518	1	0.77	-	-	1505	1525	TMT6plex	M1:TMT6plex:1000.00;K21:TMT6plex:1000.00
21	15	Q62261|SPTB2_MOUSE	K.L(+229.16)LDPEDISVDHPDEK(+229.16).S	Y	Y	75.05	21.66	2179.14	0.5	727.388	43.98	2	51855	CDC HF2 20180131.wiff	5	2500	2250	1.1	0.99	2500	2250	1	0.9	0	0.09	250	264	TMT6plex	L1:TMT6plex:1000.00;K15:TMT6plex:1000.00
21	15	Q62261|SPTB2_MOUSE	R.F(+229.16)ESLEPEMNNQASR.V	Y	Y	74.86	17.46	1879.89	-0.3	627.638	38.1	2	48066	CDC HF2 20180131.wiff	1	241	282.965	0.98	1.15	241	282.965	1	1.17	-	-	891	904	TMT6plex	F1:TMT6plex:1000.00
21	15	Q62261|SPTB2_MOUSE	R.E(+229.16)VVAGSHELGQDYEHVTMLQER.F	Y	Y	74.7	20.87	2755.34	-0.6	689.843	35.85	2	46611	CDC HF2 20180131.wiff	2	1160	660.251	1.61	0.92	1160	660.251	1	0.57	0	0.5	1718	1739	TMT6plex	E1:TMT6plex:1000.00
21	15	Q62261|SPTB2_MOUSE	R.S(+229.16)QNIITDSSSLNAEAIR.Q	Y	Y	74.47	17.23	2047.07	1.8	683.367	37.11	3	47818	CDC HF3 20180131.wiff	3	1450	1050	1.34	0.98	1450	1050	1	0.73	0	0.1	1548	1564	TMT6plex	S1:TMT6plex:1000.00
21	15	Q62261|SPTB2_MOUSE	R.T(+229.16)QTAIASEDMPNTLTEAEK(+229.16).L	Y	Y	72.53	20.09	2507.28	-0.9	836.768	39.06	1	48477	CDC HF1 20180131.wiff	2	582	548.617	0.96	0.91	582	548.617	1	0.94	0	0.09	1081	1099	TMT6plex	T1:TMT6plex:1000.00;K19:TMT6plex:1000.00
21	15	Q62261|SPTB2_MOUSE	K.F(+229.16)ATDGEGYK(+229.16)PC(+57.02)DPQVIR.D	Y	Y	71.93	16.43	2410.24	0.1	603.566	33.42	4	44997	CDC HF4 20180131.wiff	8	4900	4520	1.05	0.97	4900	4520	1	0.92	0	0.3	594	610	TMT6plex; Carbamidomethylation	F1:TMT6plex:1000.00;K9:TMT6plex:1000.00;C11:Carbamidomethylation:1000.00
21	15	Q62261|SPTB2_MOUSE	R.S(+229.16)WHNVYC(+57.02)VINNQEMGFYK(+229.16).D	Y	Y	71.81	19.51	2746.34	0.2	687.592	56.69	7	62418	CDC HF7 20180131.wiff	2	608	503.844	1.07	0.89	608	503.844	1	0.83	0	0.36	2220	2237	TMT6plex; Carbamidomethylation	S1:TMT6plex:1000.00;C7:Carbamidomethylation:1000.00;K18:TMT6plex:1000.00
21	15	Q62261|SPTB2_MOUSE	R.D(+229.16)LMLWMEDVIR.Q	Y	Y	70.39	17.78	1648.85	-25.9	825.412	80.53	5	79567	CDC HF5 20180131.wiff	1	438	429.82	0.95	0.93	438	429.82	1	0.98	-	-	1922	1932	TMT6plex	D1:TMT6plex:1000.00
21	15	Q62261|SPTB2_MOUSE	R.L(+229.16)QALDTGWNELHK(+229.16).M	Y	Y	68.98	18.84	1982.1	-10.9	661.7	49.96	5	59698	CDC HF5 20180131.wiff	2	3340	3360	0.97	0.98	3340	3360	1	1.01	0	0.04	1144	1156	TMT6plex	L1:TMT6plex:1000.00;K13:TMT6plex:1000.00
21	15	Q62261|SPTB2_MOUSE	R.V(+229.16)DTVNNMADELINSGHSDAATIAEWK(+229.16).D	Y	Y	68.15	20.91	3258.62	-26.8	815.641	69.6	5	72500	CDC HF5 20180131.wiff	1	478	460.862	0.95	0.91	478	460.862	1	0.96	-	-	1755	1780	TMT6plex	V1:TMT6plex:1000.00;K26:TMT6plex:1000.00
21	15	Q62261|SPTB2_MOUSE	K.M(+229.16)WEVLESTTQTK(+229.16).A	Y	Y	67.39	19.98	1910.02	-11.4	637.674	59.9	5	66198	CDC HF5 20180131.wiff	3	1120	1060	1.03	0.98	1120	1060	1	0.95	0	0.23	1361	1372	TMT6plex	M1:TMT6plex:1000.00;K12:TMT6plex:1000.00
21	15	Q62261|SPTB2_MOUSE	K.E(+229.16)GEDMIAEEHFGSEK(+229.16).I	Y	Y	66.8	18.84	2165.04	-3	722.683	32.03	2	44137	CDC HF2 20180131.wiff	3	1520	1260	1.13	0.94	1520	1260	1	0.83	0	0.22	700	714	TMT6plex	E1:TMT6plex:1000.00;K15:TMT6plex:1000.00
21	15	Q62261|SPTB2_MOUSE	K.E(+229.16)AIC(+57.02)EVALDYK(+229.16).K	Y	Y	66.63	17.2	1767.95	-0.8	590.323	48.11	2	54535	CDC HF2 20180131.wiff	3	1630	1360	1.13	0.94	1630	1360	1	0.83	0	0.35	2258	2268	TMT6plex; Carbamidomethylation	E1:TMT6plex:1000.00;C4:Carbamidomethylation:1000.00;K11:TMT6plex:1000.00
21	15	Q62261|SPTB2_MOUSE	K.L(+229.16)EDLEVIQHR.F	Y	Y	65.69	18.82	1479.82	0.8	494.283	37.51	2	47681	CDC HF2 20180131.wiff	3	1860	1210	1.47	0.95	1860	1210	1	0.65	0	0.16	881	890	TMT6plex	L1:TMT6plex:1000.00
21	15	Q62261|SPTB2_MOUSE	R.L(+229.16)VSDGNINSDR.I	Y	Y	65.55	20.73	1417.74	0.9	709.876	17.85	2	34904	CDC HF2 20180131.wiff	5	2950	2770	1.12	1.05	2950	2770	1	0.94	0	0.16	1235	1245	TMT6plex	L1:TMT6plex:1000.00
21	15	Q62261|SPTB2_MOUSE	R.L(+229.16)SDGNEYLFQAK(+229.16).D	Y	Y	65.53	20.74	1841.99	-2.5	615.003	47.39	4	54080	CDC HF4 20180131.wiff	5	4300	4100	1.1	1.05	4300	4100	1	0.95	0	0.18	2278	2289	TMT6plex	L1:TMT6plex:1000.00;K12:TMT6plex:1000.00
21	15	Q62261|SPTB2_MOUSE	R.A(+229.16)LVADSHPESER.I	Y	Y	65.07	21.84	1538.79	2.4	513.938	8.98	1	28871	CDC HF1 20180131.wiff	2	1520	1520	1.07	1.07	1520	1520	1	1	0	0.16	1657	1668	TMT6plex	A1:TMT6plex:1000.00
21	15	Q62261|SPTB2_MOUSE	R.L(+229.16)VSQDNFGFDLPAVEAATK(+229.16)K(+229.16).H	Y	Y	65.06	19.29	2836.59	0.6	710.156	63.74	6	67971	CDC HF6 20180131.wiff	3	962	949.782	1.06	1.05	962	949.782	1	0.99	0	0.31	444	463	TMT6plex	L1:TMT6plex:1000.00;K19:TMT6plex:1000.00;K20:TMT6plex:1000.00
21	15	Q62261|SPTB2_MOUSE	K.H(+229.16)QAFMAELASNK(+229.16).E	Y	Y	64.96	19.51	1803.97	-1.8	602.33	31.38	6	46954	CDC HF6 20180131.wiff	1	592	452.505	1.23	0.94	592	452.505	1	0.76	-	-	1316	1327	TMT6plex	H1:TMT6plex:1000.00;K12:TMT6plex:1000.00
21	15	Q62261|SPTB2_MOUSE	K.F(+229.16)MELLEPLSER.K	Y	Y	64.04	20.8	1591.85	-2.6	796.929	71.95	4	69959	CDC HF4 20180131.wiff	2	701	688.905	0.99	0.97	701	688.905	1	0.98	0	0.09	1467	1477	TMT6plex	F1:TMT6plex:1000.00
21	15	Q62261|SPTB2_MOUSE	K.E(+229.16)GMQLISEK(+229.16)PETEAVVK(+229.16).E	Y	Y	63.86	21.08	2574.45	-1.1	644.62	41.45	4	50205	CDC HF4 20180131.wiff	6	3440	3510	0.99	1.01	3440	3510	1	1.02	0	0.42	1336	1352	TMT6plex	E1:TMT6plex:1000.00;K9:TMT6plex:1000.00;K17:TMT6plex:1000.00
21	15	Q62261|SPTB2_MOUSE	R.N(+229.16)DSFTAC(+57.02)IELGK(+229.16).S	Y	Y	63.6	19.75	1811.95	4.3	906.986	45.7	4	52979	CDC HF4 20180131.wiff	2	652	765.318	0.99	1.16	652	765.318	1	1.17	0	0.41	1964	1975	TMT6plex; Carbamidomethylation	N1:TMT6plex:1000.00;C7:Carbamidomethylation:1000.00;K12:TMT6plex:1000.00
21	15	Q62261|SPTB2_MOUSE	R.E(+229.16)LEAENYHDIK(+229.16).R	Y	Y	63.42	19.94	1817.96	-0.6	606.992	23.88	2	38834	CDC HF2 20180131.wiff	4	1930	1720	1.08	0.97	1930	1720	1	0.89	0	0.26	487	497	TMT6plex	E1:TMT6plex:1000.00;K11:TMT6plex:1000.00
21	15	Q62261|SPTB2_MOUSE	R.L(+229.16)TTLELLEVR.R	Y	Y	62.12	21.88	1414.86	-17.4	708.425	62.22	5	67718	CDC HF5 20180131.wiff	3	2440	2520	1.02	1.05	2440	2520	1	1.03	0	0.31	2079	2088	TMT6plex	L1:TMT6plex:1000.00
21	15	Q62261|SPTB2_MOUSE	K.Q(+229.16)LWGLLIEETEK(+229.16).R	Y	Y	61.93	17.17	1916.1	-11.3	639.701	73.71	5	75148	CDC HF5 20180131.wiff	1	736	438.177	1.51	0.9	736	438.177	1	0.6	-	-	1572	1583	TMT6plex	Q1:TMT6plex:1000.00;K12:TMT6plex:1000.00
21	15	Q62261|SPTB2_MOUSE	R.D(+229.16)GMAFNALIHK(+229.16).H	Y	Y	61.16	21.79	1673.93	-6.5	558.981	43.41	6	54755	CDC HF6 20180131.wiff	5	4050	4360	0.9	0.97	4050	4360	1	1.08	0	0.08	204	214	TMT6plex	D1:TMT6plex:1000.00;K11:TMT6plex:1000.00
21	15	Q62261|SPTB2_MOUSE	K.S(+229.16)LLDAC(+57.02)EGR.R	Y	Y	61.12	20.98	1248.63	-1.6	625.323	23.21	2	38399	CDC HF2 20180131.wiff	4	2960	2470	1.21	1.01	2960	2470	1	0.84	0	0.26	1895	1903	TMT6plex; Carbamidomethylation	S1:TMT6plex:1000.00;C6:Carbamidomethylation:1000.00
21	15	Q62261|SPTB2_MOUSE	K.F(+229.16)LQDC(+57.02)QELSLWINEK(+229.16).M	Y	Y	60.89	20.06	2380.25	-25.6	794.404	72.39	5	74290	CDC HF5 20180131.wiff	4	3740	3300	1.07	0.94	3740	3300	1	0.88	0	0.1	1280	1294	TMT6plex; Carbamidomethylation	F1:TMT6plex:1000.00;C5:Carbamidomethylation:1000.00;K15:TMT6plex:1000.00
21	15	Q62261|SPTB2_MOUSE	R.D(+229.16)LDDFQSWLSR.T	Y	Y	60.52	16.07	1609.79	0	805.904	66.4	4	66395	CDC HF4 20180131.wiff	1	266	275.204	1.06	1.1	266	275.204	1	1.03	-	-	1070	1080	TMT6plex	D1:TMT6plex:1000.00
21	15	Q62261|SPTB2_MOUSE	K.V(+229.16)LDNAIETEK(+229.16).M	Y	Y	60.33	19.77	1588.91	-0.4	795.461	34.95	2	46032	CDC HF2 20180131.wiff	8	4710	4100	1.09	0.95	4710	4100	1	0.87	0	0.24	293	302	TMT6plex	V1:TMT6plex:1000.00;K10:TMT6plex:1000.00
21	15	Q62261|SPTB2_MOUSE	K.Q(+229.16)ALQDTLALYK(+229.16).M	Y	Y	60.08	21.83	1721.01	-4.4	574.676	52.01	6	60339	CDC HF6 20180131.wiff	4	3960	3310	1.13	0.94	3960	3310	1	0.83	0	0.21	843	853	TMT6plex	Q1:TMT6plex:1000.00;K11:TMT6plex:1000.00
21	15	Q62261|SPTB2_MOUSE	K.Q(+229.16)LWGLLIEETEK(+229.16)R.H	Y	Y	59.32	16.67	2072.2	-18.9	691.729	68.49	5	71779	CDC HF5 20180131.wiff	3	1330	1320	0.93	0.93	1330	1320	1	1	0	0.1	1572	1584	TMT6plex	Q1:TMT6plex:1000.00;K12:TMT6plex:1000.00
21	15	Q62261|SPTB2_MOUSE	K.H(+229.16)LLGVEDLLQK(+229.16).H	Y	Y	58.95	20.83	1722.04	-7.7	575.018	51.75	5	60862	CDC HF5 20180131.wiff	2	1660	1560	1.06	1	1660	1560	1	0.94	0	0	559	569	TMT6plex	H1:TMT6plex:1000.00;K11:TMT6plex:1000.00
21	15	Q62261|SPTB2_MOUSE	K.E(+229.16)AIC(+57.02)EVALDYK(+229.16)K(+229.16).K	Y	Y	58.8	20.54	2125.21	-2.5	709.408	41.88	4	50494	CDC HF4 20180131.wiff	2	867	910.382	1.02	1.07	867	910.382	1	1.05	0	0.29	2258	2269	TMT6plex; Carbamidomethylation	E1:TMT6plex:1000.00;C4:Carbamidomethylation:1000.00;K11:TMT6plex:1000.00;K12:TMT6plex:1000.00
21	15	Q62261|SPTB2_MOUSE	R.E(+229.16)AASELLMR.L	Y	Y	58.7	20.09	1247.67	0.2	624.845	33.02	2	44780	CDC HF2 20180131.wiff	5	3410	3280	1.08	1.04	3410	3280	1	0.96	0	0.15	1262	1270	TMT6plex	E1:TMT6plex:1000.00
21	15	Q62261|SPTB2_MOUSE	R.L(+229.16)AEISDVWEEMK(+229.16).T	Y	Y	58.49	15.25	1907.01	-3.6	636.676	71.45	4	69632	CDC HF4 20180131.wiff	3	1470	1530	1.01	1.06	1470	1530	1	1.04	0	0.24	1037	1048	TMT6plex	L1:TMT6plex:1000.00;K12:TMT6plex:1000.00
21	15	Q62261|SPTB2_MOUSE	K.V(+229.16)SEEAESQQWDTSK(+229.16).G	Y	Y	55.83	14.81	2081.03	3.4	521.267	28.44	1	41578	CDC HF1 20180131.wiff	4	1310	1320	1.08	1.09	1310	1320	1	1.01	0	0.13	2109	2122	TMT6plex	V1:TMT6plex:1000.00;K14:TMT6plex:1000.00
21	15	Q62261|SPTB2_MOUSE	R.D(+229.16)QNTVETLQR.M	Y	Y	55.78	20.72	1431.75	1.6	716.885	12.71	1	31307	CDC HF1 20180131.wiff	3	2980	2390	1.14	0.92	2980	2390	1	0.8	0	0.22	1835	1844	TMT6plex	D1:TMT6plex:1000.00
21	15	Q62261|SPTB2_MOUSE	R.V(+229.16)AVVNQIAR.Q	Y	Y	55.64	18.25	1197.74	-1.3	599.876	25.33	7	41972	CDC HF7 20180131.wiff	5	6380	5830	1.06	0.97	6380	5830	1	0.91	0	0.21	905	913	TMT6plex	V1:TMT6plex:1000.00
21	15	Q62261|SPTB2_MOUSE	R.L(+229.16)ILEVHQFSR.D	Y	Y	55.41	14.53	1469.86	-2	490.958	40.63	6	52953	CDC HF6 20180131.wiff	6	2140	2230	1	1.05	2140	2230	1	1.04	0	0.21	2015	2024	TMT6plex	L1:TMT6plex:1000.00
21	15	Q62261|SPTB2_MOUSE	R.L(+229.16)EMNLGLQK(+229.16).I	Y	Y	55.38	19.92	1502.89	-4	752.449	47.57	6	57467	CDC HF6 20180131.wiff	5	3100	3180	0.97	0.99	3100	3180	1	1.02	0	0.04	524	532	TMT6plex	L1:TMT6plex:1000.00;K9:TMT6plex:1000.00
21	15	Q62261|SPTB2_MOUSE	K.I(+229.16)NAVVETGR.R	Y	Y	55.02	19	1186.69	-1.3	594.35	21.18	4	37039	CDC HF4 20180131.wiff	4	2420	2340	1.13	1.09	2420	2340	1	0.96	0	0.36	1225	1233	TMT6plex	I1:TMT6plex:1000.00
21	15	Q62261|SPTB2_MOUSE	K.M(+229.16)FSEADAC(+57.02)ELWIDEK(+229.16).E	Y	Y	54.83	18.71	2301.11	1.7	768.044	66.92	3	67162	CDC HF3 20180131.wiff	1	279	219.089	0.99	0.78	279	219.089	1	0.79	-	-	854	868	TMT6plex; Carbamidomethylation	M1:TMT6plex:1000.00;C8:Carbamidomethylation:1000.00;K15:TMT6plex:1000.00
21	15	Q62261|SPTB2_MOUSE	R.A(+229.16)FEDEMSGR.S	Y	Y	54.41	20.76	1269.59	0.9	635.801	24.07	1	38736	CDC HF1 20180131.wiff	5	3270	3580	0.96	1.05	3270	3580	1	1.09	0	0.19	682	690	TMT6plex	A1:TMT6plex:1000.00
21	15	Q62261|SPTB2_MOUSE	K.Q(+229.16)QMLENQMEVR.K	Y	Y	54.03	18.22	1633.81	4.1	817.917	26.64	3	41013	CDC HF3 20180131.wiff	1	215	288.934	0.86	1.16	215	288.934	1	1.34	-	-	1422	1432	TMT6plex	Q1:TMT6plex:1000.00
21	15	Q62261|SPTB2_MOUSE	R.E(+229.16)LEAENYHDIK(+229.16)R.I	Y	Y	54	19.81	1974.06	0.1	494.522	18.11	2	35068	CDC HF2 20180131.wiff	2	2560	2900	1.01	1.14	2560	2900	1	1.13	0	0.06	487	498	TMT6plex	E1:TMT6plex:1000.00;K11:TMT6plex:1000.00
21	15	Q62261|SPTB2_MOUSE	R.L(+229.16)QAAYAGDK(+229.16).A	Y	Y	52.94	20.29	1393.8	0.5	697.906	23.12	4	38313	CDC HF4 20180131.wiff	4	2860	2370	1.18	0.98	2860	2370	1	0.83	0	0.15	1870	1878	TMT6plex	L1:TMT6plex:1000.00;K9:TMT6plex:1000.00
21	15	Q62261|SPTB2_MOUSE	K.A(+229.16)K(+229.16)DEQSAVSMLK(+229.16).K	Y	Y	52.8	18.24	1993.15	11.1	499.3	28.35	5	45617	CDC HF5 20180131.wiff	3	1330	1540	0.51	0.59	1330	1540	1	1.16	0	0.27	1621	1632	TMT6plex	A1:TMT6plex:1000.00;K2:TMT6plex:1000.00;K12:TMT6plex:1000.00
21	15	Q62261|SPTB2_MOUSE	K.V(+229.16)LLLSQDYGK(+229.16).H	Y	Y	52.48	21.7	1592.95	-4.2	797.481	49.93	6	58989	CDC HF6 20180131.wiff	4	3730	3290	1.07	0.94	3730	3290	1	0.88	0	0.16	549	558	TMT6plex	V1:TMT6plex:1000.00;K10:TMT6plex:1000.00
21	15	Q62261|SPTB2_MOUSE	R.S(+229.16)GHFEQAIK(+229.16).E	Y	Y	52.16	20.01	1473.83	-2.4	492.284	15.9	4	33593	CDC HF4 20180131.wiff	6	5180	3600	1.18	0.82	5180	3600	1	0.69	0	0.15	691	699	TMT6plex	S1:TMT6plex:1000.00;K9:TMT6plex:1000.00
21	15	Q62261|SPTB2_MOUSE	R.V(+229.16)QAVVAVAR.E	Y	Y	51.87	20.06	1140.72	-5.9	571.363	25.18	7	41875	CDC HF7 20180131.wiff	7	5340	4560	1.03	0.88	5340	4560	1	0.85	0	0.16	478	486	TMT6plex	V1:TMT6plex:1000.00
[truncated: 15,221 more rows]

## Sheet: cortex-proteins
Protein Group	Protein ID	Accession	Significance	-10lgP	Intensity Young	Intensity Aged	Ratio Young	Ratio Aged	Intensity Young	Intensity Aged	Ratio Young	Ratio Aged	SD Young	SD Aged	Coverage (%)	#Peptides	#Unique	PTM	Avg. Mass	Description
[truncated: 2,931 more rows]

[truncated: 1 more sheets: cortex-proteins-peptides]
