# Supplementary material for: Proteomic Profile of Mouse Brain Aging Contributions to Mitochondrial Dysfunction, DNA Oxidative Damage, Loss of Neurotrophic Factor, and Synaptic and Ribosomal Proteins
Source: Oxid Med Cell Longev. 2020 Jun 9;2020:5408452. doi: 10.1155/2020/5408452 (PMC7301248; doi:10.1155/2020/5408452)
Supplement: Supplementary 2 — Supplementary Excel 2: all verification raw data of Western blot analysis. [file 5408452.f2.xls]

## Sheet: Sheet1
		hippocampus		cortex
		WB P value	Ratio	WB P value	Ratio
Fig 6	FIS1	0.0133	1.51	0.0174	0.83
	DRP1	0.0457	/	0.0447	/
	OPA1	0.8602	1.2	0.5163	0.97
	MFN1	0.6604	/	0.1286	/
	MFN2	0.62	1.06	0.3817	1.05
Fig 7	Complex I(NDUAA)	0.0215	1.18	0.8242	1.07
	Complex II(SDHB)	0.0286	1.07	0.349	1.06
	Complex III(UCRI)	0.017	1.03	0.7155	1.03
	Complex IV(COX5A)	/	1.16	0.6029	0.99
	Complex IV(COX5B)	0.0433	0.93	/	1
	Complex V(ATP5A)	0.0056	1.16	0.6487	1.18
	PGAM1	0.0261	1.01	/	0.99
	MPC2	/	/	0.0404	0.63
Fig 8	PRDX6	0.0108	1.24	0.0303	1.29
	CHOP	0.0426	/	0.0018	/
Fig 9	SYT1	0.7158	0.86	0.0529	0.88
	SYT12	0.3829	/	0.0258	0.65
	CPLX2	0.0001	0.81	0.0481	0.74
	SYN2	0.0532	1.12	0.2199	1.04
	synaptophysin	0.002	0.84	0.0467	0.9
	GLUR2	0.0406	1.15	0.0583	0.86
	PSD95	0.2117	/	0.05	/
	NMDAR2A	0.0067	0.95	0.9277	0.95
	NMDAR1	0.0014	0.78	0.9146	0.95
